# Supplementary material
Source: PubMed Central journal article supplement (PMC6982545)

## Table of Contents

|                                                                                                            |    |
|------------------------------------------------------------------------------------------------------------|----|
| Table S1. Initial screen of IMD-0354 analogues for colistin resistance suppression.....                    | 2  |
| Table S2. Activity of compounds identified in initial screen against colistin resistant isolate panel..... | 4  |
| Table S3. Dose response data for active analogues against KP B9.....                                       | 6  |
| Table S4. Dose response data for active analogues against AB 4106.....                                     | 10 |
| Dose response curves for cytotoxicity assay.....                                                           | 13 |
| Synthetic procedures and compound characterization.....                                                    | 14 |
| References.....                                                                                            | 29 |

**Table S1. Initial screen of IMD-0354 analogues for colistin resistance suppression**

| Compound        | KP B9          |                                                             | AB 4106        |                                                |
|-----------------|----------------|-------------------------------------------------------------|----------------|------------------------------------------------|
|                 | MIC ( $\mu$ M) | Colistin MIC ( $\mu$ g/mL)<br>(fold reduction) <sup>a</sup> | MIC ( $\mu$ M) | Colistin MIC ( $\mu$ g/mL) (fold<br>reduction) |
| -               |                | 512                                                         | -              | 2048                                           |
| <b>IMD-0354</b> | 50             | 0.5 (1024)                                                  | 50             | 2 (1024)                                       |
| <b>1</b>        | >200           | >64 ( $\leq$ 4)                                             | >200           | >64 ( $\leq$ 16)                               |
| <b>2</b>        | >200           | >64 ( $\leq$ 4)                                             | >200           | >64 ( $\leq$ 16)                               |
| <b>3</b>        | >200           | 0.5 (1024)                                                  | >200           | 4 (512)                                        |
| <b>4</b>        | >200           | >64 ( $\leq$ 4)                                             | >200           | >64 ( $\leq$ 16)                               |
| <b>5</b>        | 200            | 1 (512)                                                     | 100            | 4 (512)                                        |
| <b>6</b>        | >200           | 0.5 (1024)                                                  | >200           | 4 (512)                                        |
| <b>7</b>        | >200           | >64 ( $\leq$ 4)                                             | >200           | >64 ( $\leq$ 16)                               |
| <b>8</b>        | >200           | 0.5 (1024)                                                  | >200           | 2 (1024)                                       |
| <b>9</b>        | 25             | 0.25 (2048)                                                 | $\geq$ 100     | 2 (1024)                                       |
| <b>10</b>       | >200           | 0.5 (1024)                                                  | >200           | 0.5 (4096)                                     |
| <b>11</b>       | >200           | 16 (32)                                                     | >200           | 8 (256)                                        |
| <b>12</b>       | >200           | 0.5 (1024)                                                  | >200           | 4 (512)                                        |
| <b>13</b>       | >200           | 4 (128)                                                     | >200           | 4 (512)                                        |
| <b>14</b>       | 100            | 1 (512)                                                     | 100            | 4 (512)                                        |
| <b>15</b>       | >200           | 0.25 (2048)                                                 | >200           | 1 (2048)                                       |
| <b>16</b>       | 200            | 2 (256)                                                     | >200           | >64 ( $\leq$ 16)                               |
| <b>17</b>       | >200           | 0.5 (1024)                                                  | >200           | 2 (1024)                                       |
| <b>18</b>       | 50             | 0.5 (1024)                                                  | >200           | 2 (1024)                                       |
| <b>19</b>       | >200           | >64 ( $\leq$ 4)                                             | >200           | >64 ( $\leq$ 16)                               |
| <b>20</b>       | >200           | 1 (512)                                                     | >200           | 2 (1024)                                       |
| <b>21</b>       | 200            | 0.25 (2048)                                                 | >200           | 2 (1024)                                       |
| <b>22</b>       | >200           | 0.25 (2048)                                                 | >200           | 2 (1024)                                       |
| <b>23</b>       | >200           | 0.25 (2048)                                                 | >200           | 2 (1024)                                       |
| <b>24</b>       | >200           | 0.5 (1024)                                                  | $\geq$ 200     | 0.5 (4096)                                     |
| <b>25</b>       | 100            | 0.25 (2048)                                                 | 50             | 1 (2048)                                       |
| <b>26</b>       | >200           | 0.25 (2048)                                                 | >200           | 1 (2048)                                       |
| <b>27</b>       | $\geq$ 200     | 1 (512)                                                     | >200           | 8 (256)                                        |
| <b>28</b>       | >200           | 0.5 (1024)                                                  | >200           | 2 (1024)                                       |
| <b>29</b>       | >200           | 0.5 (1024)                                                  | >200           | 1 (2048)                                       |
| <b>30</b>       | >200           | 4 (128)                                                     | >200           | 64 (32)                                        |
| <b>31</b>       | >200           | 16 (32)                                                     | >200           | 64 (32)                                        |
| <b>32</b>       | >200           | 8 (64)                                                      | >200           | 64 (32)                                        |
| <b>33</b>       | >200           | 2 (256)                                                     | >200           | 16 (128)                                       |

|    |      |                  |      |                   |
|----|------|------------------|------|-------------------|
| 34 | >200 | >64 ( $\leq 4$ ) | >200 | >64 ( $\leq 16$ ) |
| 35 | >200 | 1 (512)          | >200 | 64 (32)           |
| 36 | >200 | >64 ( $\leq 4$ ) | >200 | >64 ( $\leq 16$ ) |
| 37 | >200 | 0.25 (2048)      | >200 | 1 (2048)          |
| 38 | >200 | >64 ( $\leq 4$ ) | >200 | >64 ( $\leq 16$ ) |
| 39 | >200 | 4 (128)          | >200 | 8 (256)           |
| 40 | >200 | 0.5 (1024)       | >200 | 2 (1024)          |
| 41 | >200 | 2 (256)          | >200 | 16 (128)          |
| 42 | 25   | 0.5 (1024)       | 200  | 8 (256)           |
| 43 | >200 | 0.125 (4096)     | >200 | 2 (1024)          |
| 44 | >200 | >64 ( $\leq 4$ ) | >200 | >64 ( $\leq 16$ ) |
| 45 | >200 | 0.5 (1024)       | >200 | 2 (1024)          |
| 46 | >200 | 0.25 (2048)      | >200 | 4 (512)           |
| 47 | >200 | 0.5 (1024)       | >200 | 2 (1024)          |
| 48 | >200 | 1 (512)          | >200 | 16 (128)          |
| 49 | >200 | 0.25 (2048)      | 200  | 1 (2048)          |
| 50 | >200 | 0.25             | >200 | 4 (512)           |
| 51 | >200 | 0.125            | >200 | 1 (2048)          |
| 52 | >200 | 0.5              | >200 | 1 (2048)          |
| 53 | >200 | 1                | >200 | 8 (256)           |
| 54 | 100  | 1                | 200  | 2 (1024)          |
| 55 | >200 | 0.5              | >200 | 1 (2048)          |
| 56 | >200 | 0.5              | >200 | 1 (2048)          |
| 57 | >200 | 1                | >200 | 8 (256)           |
| 58 | >200 | >64 ( $\leq 4$ ) | >200 | >64 ( $\leq 16$ ) |
| 59 | >200 | 32               | >200 | >64 ( $\leq 16$ ) |
| 60 | 50   | 0.5              | 50   | 1 (2048)          |
| 61 | >200 | >64 ( $\leq 4$ ) | >200 | >64 ( $\leq 16$ ) |
| 62 | 50   | 1                | 100  | 4 (512)           |

<sup>a</sup>All compounds tested at 5  $\mu$ M

Table S2. Activity of compounds identified in initial screen against colistin resistant isolate panel

| Compound | KP C3 | KP A5 | KP<br>F2210291 <sup>mcr-1</sup> | AB 3941 | AB 3942 | AB 4112 | AB 4119 | AB<br>17978 <sup>mcr-1</sup> |
|----------|-------|-------|---------------------------------|---------|---------|---------|---------|------------------------------|
| -        | 128   | 2048  | 16                              | 1024    | >2048   | 2048    | 1024    | 64                           |
| IMD-0354 | 0.5   | 8     | 0.5                             | 2       | 2       | 2       | 4       | 0.5                          |
| 3        | 4     | >64   | 1                               | 8       | 8       | 8       | 4       | 0.5                          |
| 5        | 2     | 4     | 0.5                             | 8       | 8       | 8       | 4       | N.T. <sup>b</sup>            |
| 6        | 1     | 2     | 0.5                             | 4       | 4       | 4       | 4       | 0.5                          |
| 8        | 1     | 4     | 1                               | 2       | 2       | 2       | 2       | 0.5                          |
| 9        | 1     | 1     | 0.5                             | 2       | 2       | 2       | 2       | 0.5                          |
| 10       | 0.5   | 2     | 0.5                             | 1       | 1       | 1       | 1       | 1                            |
| 12       | 2     | >64   | 0.5                             | 4       | 4       | 4       | 2       | 0.5                          |
| 13       | N.T.  | N.T.  | N.T.                            | 16      | 32      | 8       | 2       | 4                            |
| 14       | 2     | 4     | 1                               | 8       | 4       | 4       | 4       | 1                            |
| 15       | 0.5   | 4     | 0.25                            | 2       | 2       | 1       | 2       | 0.25                         |
| 17       | 1     | 4     | 0.25                            | 4       | 4       | 4       | 4       | 0.25                         |
| 18       | 1     | 2     | 0.5                             | 2       | 2       | 2       | 2       | 0.5                          |
| 20       | 0.5   | 1     | 0.5                             | 4       | 4       | 4       | 4       | 0.25                         |
| 21       | 0.25  | 0.5   | 0.5                             | 2       | 2       | 2       | 4       | 0.25                         |
| 22       | 0.5   | 0.5   | 0.25                            | 2       | 2       | 2       | 2       | 0.25                         |
| 23       | 0.5   | 0.5   | 0.125                           | 2       | 2       | 2       | 1       | 0.5                          |
| 24       | 0.5   | 4     | 0.25                            | 1       | 0.5     | 0.25    | 0.125   | 0.25                         |
| 25       | 0.5   | 4     | 0.5                             | 1       | 1       | 1       | 1       | 0.5                          |
| 26       | 0.5   | 1     | 0.5                             | 2       | 2       | 2       | 2       | 0.25                         |
| 27       | 2     | 8     | 0.5                             | N.T.    | N.T.    | N.T.    | N.T.    | N.T.                         |
| 28       | 0.5   | 2     | 0.25                            | 2       | 2       | 2       | 1       | 0.25                         |
| 29       | 1     | 1     | 0.25                            | 1       | 1       | 1       | 2       | 0.125                        |
| 35       | 2     | 8     | 1                               | N.T.    | N.T.    | N.T.    | N.T.    | N.T.                         |
| 37       | 0.25  | 0.5   | 0.25                            | 2       | 2       | 2       | 1       | 0.25                         |
| 40       | 0.5   | 2     | 0.5                             | 8       | 4       | 4       | 4       | 0.25                         |
| 42       | 0.5   | 2     | 0.25                            | N.T.    | N.T.    | N.T.    | N.T.    | N.T.                         |
| 43       | 0.25  | 1     | 0.25                            | 2       | 2       | 2       | 2       | 0.125                        |
| 45       | 0.25  | 0.5   | 0.5                             | 2       | 2       | 2       | 1       | 0.25                         |
| 46       | 0.5   | 1     | 0.25                            | 2       | 4       | 4       | 4       | 0.5                          |
| 47       | 0.25  | 1     | 0.25                            | 2       | 2       | 2       | 1       | 0.5                          |
| 48       | 2     | 8     | 0.5                             | N.T.    | N.T.    | N.T.    | N.T.    | N.T.                         |
| 49       | 0.5   | 4     | 0.25                            | 2       | 2       | 2       | 1       | 0.25                         |

|           |      |      |      |      |      |      |      |       |
|-----------|------|------|------|------|------|------|------|-------|
| <b>50</b> | 0.5  | 1    | 0.5  | 4    | 4    | 2    | 4    | 0.25  |
| <b>51</b> | 0.25 | 0.25 | 0.25 | 1    | 1    | 1    | 0.5  | 0.125 |
| <b>52</b> | 0.5  | 1    | 0.25 | 1    | 1    | 1    | 2    | 0.25  |
| <b>53</b> | 1    | 8    | 0.5  | N.T. | N.T. | N.T. | N.T. | N.T.  |
| <b>54</b> | 0.5  | 1    | 0.5  | 4    | 2    | 2    | 2    | 0.5   |
| <b>55</b> | 0.5  | 1    | 0.5  | 2    | 2    | 1    | 1    | 0.5   |
| <b>56</b> | 0.5  | 1    | 0.25 | 2    | 1    | 2    | 2    | 0.125 |
| <b>57</b> | 4    | 8    | 0.5  | N.T. | N.T. | N.T. | N.T. | N.T.  |
| <b>60</b> | 1    | 2    | 0.5  | 2    | 2    | 2    | 2    | 0.25  |
| <b>62</b> | 1    | 1    | 0.5  | 8    | 8    | 4    | 4    | 0.5   |

<sup>a</sup>All compounds tested at 5  $\mu$ M. <sup>b</sup>N.T. not tested

**Table S3. Dose response data for active analogues against KP B9**

| <b>Compound</b> | <b>Concentration (<math>\mu\text{M}</math>)</b> | <b>Colistin MIC (<math>\mu\text{g/mL}</math>) (fold reduction)</b> |
|-----------------|-------------------------------------------------|--------------------------------------------------------------------|
| <b>IMD-0354</b> | 5                                               | 0.5 (1024)                                                         |
|                 | 3                                               | 0.5 (1024)                                                         |
|                 | 1                                               | 4 (128)                                                            |
| <b>3</b>        | 5                                               | 0.5 (1024)                                                         |
|                 | 3                                               | 1 (512)                                                            |
|                 | 1                                               | >64 ( $\leq 4$ )                                                   |
| <b>5</b>        | 5                                               | 1 (512)                                                            |
|                 | 3                                               | 2 (256)                                                            |
|                 | 1                                               | 16 (32)                                                            |
| <b>6</b>        | 5                                               | 0.5 (1024)                                                         |
|                 | 3                                               | 0.5 (1024)                                                         |
|                 | 1                                               | 4 (128)                                                            |
| <b>8</b>        | 5                                               | 0.5 (1024)                                                         |
|                 | 3                                               | 1 (512)                                                            |
|                 | 1                                               | 8 (64)                                                             |
| <b>9</b>        | 5                                               | 0.25 (2048)                                                        |
|                 | 3                                               | 0.5 (1024)                                                         |
|                 | 1                                               | 2 (256)                                                            |
| <b>10</b>       | 5                                               | 0.5 (1024)                                                         |
|                 | 3                                               | 1 (512)                                                            |
|                 | 1                                               | 2 (256)                                                            |
| <b>12</b>       | 5                                               | 0.5 (1024)                                                         |
|                 | 3                                               | 1 (512)                                                            |
|                 | 1                                               | >64 ( $\leq 4$ )                                                   |
| <b>14</b>       | 5                                               | 1 (512)                                                            |
|                 | 3                                               | 2 (256)                                                            |
|                 | 1                                               | 16 (32)                                                            |
| <b>15</b>       | 5                                               | 0.25 (2048)                                                        |
|                 | 3                                               | 0.5 (1024)                                                         |
|                 | 1                                               | 1 (512)                                                            |
|                 | 0.5                                             | 4 (128)                                                            |
| <b>17</b>       | 5                                               | 0.5 (1024)                                                         |
|                 | 3                                               | 0.5 (1024)                                                         |
|                 | 1                                               | 2 (256)                                                            |
| <b>18</b>       | 5                                               | 0.5 (1024)                                                         |
|                 | 3                                               | 2 (256)                                                            |
|                 | 1                                               | 4 (128)                                                            |
| <b>20</b>       | 5                                               | 0.5 (1024)                                                         |
|                 | 3                                               | 0.5 (1024)                                                         |
|                 | 1                                               | 16 (32)                                                            |

|    |       |                  |
|----|-------|------------------|
| 21 | 5     | 0.25 (2048)      |
|    | 3     | 0.5 (1024)       |
|    | 1     | 1 (512)          |
| 22 | 5     | 0.25 (2048)      |
|    | 3     | 0.5 (1024)       |
|    | 1     | 0.5 (1024)       |
|    | 0.5   | 4 (128)          |
| 23 | 5     | 0.25 (2048)      |
|    | 3     | 0.5 (1024)       |
|    | 1     | 0.5 (1024)       |
|    | 0.5   | 1 (512)          |
|    | 0.25  | 4 (128)          |
| 24 | 5     | 0.5 (1024)       |
|    | 3     | 1 (512)          |
|    | 1     | 2 (256)          |
| 25 | 5     | 0.25 (2048)      |
|    | 3     | 1 (512)          |
|    | 1     | 1 (512)          |
|    | 0.5   | 16 (32)          |
| 26 | 5     | 0.25 (2048)      |
|    | 3     | 0.5 (1024)       |
|    | 1     | 0.5 (1024)       |
|    | 0.5   | 8 (64)           |
| 28 | 5     | 0.5 (1024)       |
|    | 3     | 0.5 (1024)       |
|    | 1     | 0.5 (1024)       |
|    | 0.5   | 4 (128)          |
| 29 | 5     | 0.5 (1024)       |
|    | 3     | 0.5 (1024)       |
|    | 1     | 0.5 (1024)       |
|    | 0.5   | 0.5 (1024)       |
|    | 0.25  | 1 (512)          |
|    | 0.125 | >64 ( $\leq 4$ ) |
| 35 | 5     | 1 (512)          |
|    | 3     | 2 (256)          |
|    | 1     | >64 ( $\leq 4$ ) |
| 37 | 5     | 0.25 (2048)      |
|    | 3     | 0.5 (1024)       |
|    | 1     | 0.5 (1024)       |
|    | 0.5   | 64 (32)          |
| 40 | 5     | 0.5 (1024)       |
|    | 3     | 1 (512)          |
|    | 1     | 16 (32)          |
| 42 | 5     | 0.5 (1024)       |

|    |      |                  |
|----|------|------------------|
|    | 3    | 0.5 (1024)       |
|    | 1    | >64              |
| 43 | 5    | 0.125 (4096)     |
|    | 3    | 1 (512)          |
|    | 1    | 2 (256)          |
| 45 | 5    | 0.5 (1024)       |
|    | 3    | 0.5 (1024)       |
|    | 1    | 4 (128)          |
| 46 | 5    | 0.25 (2048)      |
|    | 3    | 2 (256)          |
|    | 1    | 8 (64)           |
| 47 | 5    | 0.5 (1024)       |
|    | 3    | 1 (512)          |
|    | 1    | 2 (256)          |
| 48 | 5    | 1 (512)          |
|    | 3    | 2 (256)          |
|    | 1    | >64 ( $\leq 4$ ) |
| 49 | 5    | 0.25 (2048)      |
|    | 3    | 0.5 (1024)       |
|    | 1    | 1 (512)          |
|    | 0.5  | 4 (128)          |
| 50 | 5    | 0.25 (2048)      |
|    | 3    | 0.5 (1024)       |
|    | 1    | 2 (256)          |
| 51 | 5    | 0.125 (4096)     |
|    | 3    | 0.25 (2048)      |
|    | 1    | 0.5 (1024)       |
|    | 0.5  | 1 (512)          |
|    | 0.25 | 16 (32)          |
| 52 | 5    | 0.5 (1024)       |
|    | 3    | 0.5 (1024)       |
|    | 1    | 1 (512)          |
|    | 0.5  | 1 (512)          |
|    | 0.25 | 16 (32)          |
| 53 | 5    | 1 (512)          |
|    | 3    | 1 (512)          |
|    | 1    | >64 ( $\leq 4$ ) |
| 54 | 5    | 1 (512)          |
|    | 3    | 2 (256)          |
|    | 1    | 4 (128)          |
| 55 | 5    | 0.5 (1024)       |
|    | 3    | 2 (256)          |
|    | 1    | 2 (256)          |
| 56 | 5    | 0.5 (1024)       |



|    |   |                  |
|----|---|------------------|
|    | 3 | 0.5 (1024)       |
|    | 1 | 4 (128)          |
| 57 | 5 | 1 (512)          |
|    | 3 | 1 (512)          |
|    | 1 | >64 ( $\leq 4$ ) |
| 60 | 5 | 0.5 (1024)       |
|    | 3 | 0.5 (1024)       |
|    | 1 | 2 (256)          |
| 62 | 5 | 1 (512)          |
|    | 3 | 1 (512)          |
|    | 1 | 8 (64)           |

Table S4. Dose response data for active analogues against AB 4106

| Compound | Concentration ( $\mu\text{M}$ ) | Colistin MIC ( $\mu\text{g}/\text{mL}$ ) (fold reduction) |
|----------|---------------------------------|-----------------------------------------------------------|
| -        | -                               | 2048 $\mu\text{g}/\text{mL}$                              |
| IMD-0354 | 5                               | 2 (1024)                                                  |
|          | 3                               | 4 (512)                                                   |
|          | 1                               | 8 (256)                                                   |
| 3        | 5                               | 4 (512)                                                   |
|          | 3                               | 8 (256)                                                   |
|          | 1                               | >64 ( $\leq 16$ )                                         |
| 5        | 5                               | 4 (512)                                                   |
|          | 3                               | 8 (256)                                                   |
|          | 1                               | >64 ( $\leq 16$ )                                         |
| 6        | 5                               | 4 (512)                                                   |
|          | 3                               | 4 (512)                                                   |
| 8        | 5                               | 2 (1024)                                                  |
|          | 3                               | 2 (1024)                                                  |
|          | 1                               | 32 (64)                                                   |
| 9        | 5                               | 2 (1024)                                                  |
|          | 3                               | 2 (1024)                                                  |
|          | 1                               | 16 (128)                                                  |
| 10       | 5                               | 0.5 (4096)                                                |
|          | 3                               | 2 (1024)                                                  |
|          | 1                               | 16 (128)                                                  |
| 12       | 5                               | 4 (512)                                                   |
|          | 3                               | 8 (256)                                                   |
|          | 1                               | >64 ( $\leq 16$ )                                         |
| 13       | 5                               | 4 (512)                                                   |
|          | 3                               | 8 (256)                                                   |
|          | 1                               | 64 (32)                                                   |
| 14       | 5                               | 4 (512)                                                   |
|          | 3                               | 4 (512)                                                   |
|          | 1                               | 64 (32)                                                   |
| 15       | 5                               | 1 (2048)                                                  |
|          | 3                               | 4 (512)                                                   |
|          | 1                               | 16 (128)                                                  |
| 17       | 5                               | 2 (1024)                                                  |
|          | 3                               | 4 (512)                                                   |
|          | 1                               | 16 (128)                                                  |
| 18       | 5                               | 2 (1024)                                                  |
|          | 3                               | 2 (1024)                                                  |
|          | 1                               | 8 (256)                                                   |
| 20       | 5                               | 2 (1024)                                                  |
|          | 3                               | 4 (512)                                                   |

|    |   |            |
|----|---|------------|
|    | 1 | 128 (16)   |
| 21 | 5 | 2 (1024)   |
|    | 3 | 4 (512)    |
|    | 1 | 32 (64)    |
| 22 | 5 | 2 (1024)   |
|    | 3 | 2 (1024)   |
|    | 1 | 4 (512)    |
| 23 | 5 | 2 (1024)   |
|    | 3 | 2 (1024)   |
|    | 1 | 8 (256)    |
| 24 | 5 | 0.5 (4096) |
|    | 3 | 1 (2048)   |
|    | 1 | 4 (512)    |
| 25 | 5 | 1 (2048)   |
|    | 3 | 2 (1024)   |
|    | 1 | 4 (512)    |
| 26 | 5 | 1 (2048)   |
|    | 3 | 2 (1024)   |
|    | 1 | 16 (128)   |
| 28 | 5 | 2 (1024)   |
|    | 3 | 2 (1024)   |
|    | 1 | 8 (256)    |
| 29 | 5 | 1 (2048)   |
|    | 3 | 2 (1024)   |
|    | 1 | 4 (512)    |
| 37 | 5 | 1 (2048)   |
|    | 3 | 2 (1024)   |
|    | 1 | 16 (128)   |
| 40 | 5 | 2 (1024)   |
|    | 3 | 8 (256)    |
|    | 1 | >64 (≤16)  |
| 43 | 5 | 2 (1024)   |
|    | 3 | 4 (512)    |
|    | 1 | 16 (128)   |
| 45 | 5 | 2 (1024)   |
|    | 3 | 4 (512)    |
|    | 1 | 8 (256)    |
| 46 | 5 | 4 (512)    |
|    | 3 | 8 (256)    |
|    | 1 | 64 (32)    |
| 47 | 5 | 2 (1024)   |
|    | 3 | 2 (1024)   |
|    | 1 | 8 (256)    |
| 49 | 5 | 1 (2048)   |

|    |   |          |
|----|---|----------|
|    | 3 | 2 (1024) |
|    | 1 | 8 (256)  |
| 50 | 5 | 4 (512)  |
|    | 3 | 8 (256)  |
|    | 1 | 32 (64)  |
| 51 | 5 | 1 (2048) |
|    | 3 | 1 (2048) |
|    | 1 | 4 (512)  |
| 52 | 5 | 1 (2048) |
|    | 3 | 2 (1024) |
|    | 1 | 8 (256)  |
| 54 | 5 | 2 (1024) |
|    | 3 | 4 (512)  |
|    | 1 | 32 (64)  |
| 55 | 5 | 1 (2048) |
|    | 3 | 2 (1024) |
|    | 1 | 8 (256)  |
| 56 | 5 | 1 (2048) |
|    | 3 | 2 (1024) |
|    | 1 | 8 (256)  |
| 60 | 5 | 1 (2048) |
|    | 3 | 4 (512)  |
|    | 1 | 16 (128) |
| 62 | 5 | 4 (512)  |
|    | 3 | 8 (256)  |
|    | 1 | 64 (32)  |

Dose response curves for cytotoxicity assay

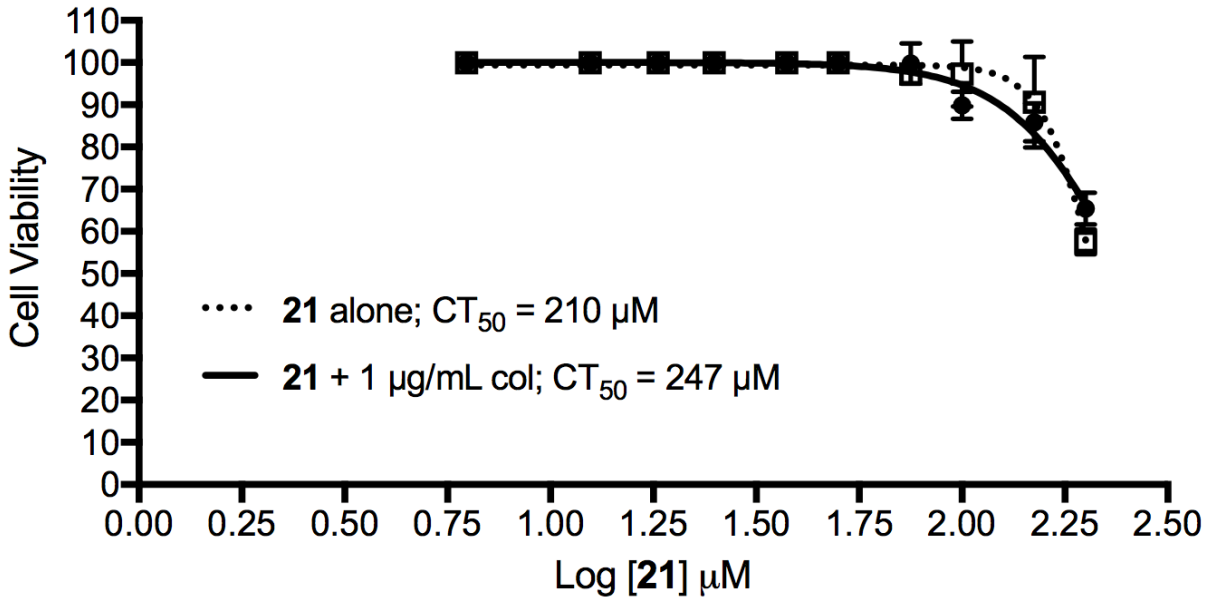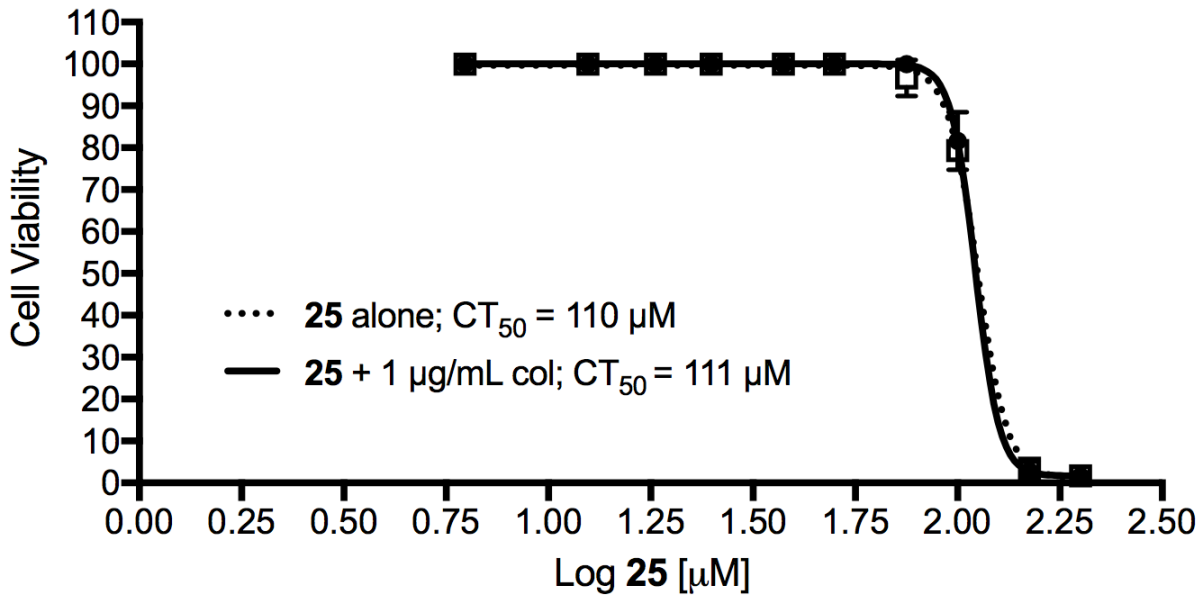

## Synthetic procedures and compound characterization

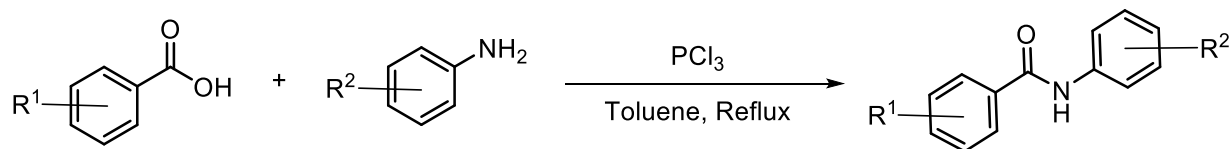

**General procedure for synthesis of N-aryl-2-hydroxybenzamide:** To a stirring solution of halogen substituted salicylic acid (100mg, 1 eq) was added to toluene under nitrogen atmosphere, then phosphorus trichloride (0.5 eq) was added dropwise and heated to reflux. Substituted Aniline (0.9 eq) was added in portion over 10 minutes and the reaction mixture was refluxed overnight. The reaction was cooled and checked for completion, ethyl acetate (100 mL) was added, taken in a separatory funnel and washed with 2N HCl (3x30 mL) followed by Brine (30 mL) and then Sodium bicarbonate (3x30 mL). The organic layer was washed with Brine (30 mL) and dried using anhydrous sodium sulfate, evaporated and purified via column using 1:2 to 1:1 DCM/Hexanes to obtain a white solid.

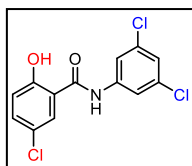

**5-chloro-N-(3,5-dichlorophenyl)-2-hydroxybenzamide (1):** The title compound was synthesized following the general procedure for synthesis of N-aryl-2-hydroxybenzamide to afford **1** as a white solid (78 mg, 45%). NMR spectra match those previously reported.<sup>1</sup>

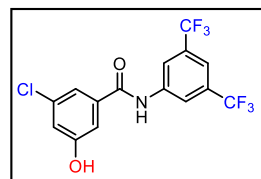

**N-(3,5-bis(trifluoromethyl)phenyl)-3-chloro-5-hydroxybenzamide (3):** The title compound was synthesized following the general procedure for synthesis of N-aryl-2-hydroxybenzamide to afford **3** as a white solid (52 mg, 39%). <sup>1</sup>H NMR (400 MHz, *d*<sub>3</sub>-Acetonitrile): 9.11 (s, 1H), 8.41 – 8.30 (m, 2H), 7.75 (s, 1H), 7.46 (t, *J* = 1.4, 0.7 Hz, 1H), 7.30 (t, *J* = 1.6 Hz, 1H), 7.08 (t, *J* = 2.0 Hz, 1H). <sup>13</sup>C NMR (100 MHz, *d*<sub>3</sub>-Acetonitrile): 164.5, 157.8, 140.1, 136.6, 134.3, 131.1 (q, *J* = 33.3 Hz), 123.1 (q, *J* = 271.8 Hz), 119.8, 119.8, 118.7, 118.5, 113.1. UV(λ<sub>max</sub> nm): 265; IR<sub>v</sub><sub>max</sub> (cm<sup>-1</sup>): 3324, 1654, 1573, 914; HRMS (ESI): calcd for C<sub>15</sub>H<sub>9</sub>ClF<sub>6</sub>NO<sub>2</sub> [M+H]<sup>+</sup>: 384.0221, found: 384.0213.

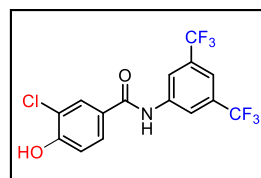

**N-(3,5-bis(trifluoromethyl)phenyl)-3-chloro-4-hydroxybenzamide(4):** The title compound was synthesized following the general procedure for synthesis of N-aryl-2-hydroxybenzamide to afford **4** as a white solid (76 mg, 14%). <sup>1</sup>H NMR (400 MHz, *d*<sub>6</sub>-DMSO): 11.11 (s, 1H), 10.66 (s, 1H), 8.50 (s, 2H), 8.09 (d, *J* = 2.3 Hz, 1H), 7.84 (dd, *J* = 8.6, 2.3 Hz, 1H), 7.80 (s, 1H), 7.11 (d, *J* = 8.5 Hz, 1H). <sup>13</sup>C NMR (100 MHz, *d*<sub>6</sub>-DMSO): 164.6, 156.8, 141.2, 130.7 (q, *J* = 32.7 Hz), 129.7, 128.6, 125.3, 123.4 (q, *J* = 272.8 Hz), 119.8 (d, *J* = 4.2 Hz), 119.7, 116.4, 116.2 (m). UV(λ<sub>max</sub> nm): 272; IR<sub>v</sub><sub>max</sub> (cm<sup>-1</sup>): 3174, 1643, 1118, 681; HRMS (ESI): calcd for C<sub>15</sub>H<sub>9</sub>ClF<sub>6</sub>NO<sub>2</sub>[M+H]<sup>+</sup>: 384.0221, found: 384.0194.

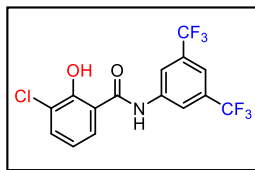

**N-(3,5-bis(trifluoromethyl)phenyl)-3-chloro-2-hydroxybenzamide (5):**

The title compound was synthesized following the general procedure for synthesis of N-aryl-2-hydroxybenzamides to afford **5** as a white solid (76 mg, 24%). <sup>1</sup>H NMR (400 MHz, *d*<sub>6</sub>-DMSO): 11.60 (s, 1H), 8.42 (s, 2H), 7.91 (dd, *J* = 8.0, 2.2 Hz, 1H), 7.84 (d, *J* = 6.4 Hz, 1H), 7.62 (dt, *J* = 8.2, 2.1 Hz, 1H), 6.93 (t, *J* = 7.9 Hz, 1H). <sup>13</sup>C NMR (100 MHz, *d*<sub>6</sub>-DMSO): 168.0, 156.3, 140.2, 134.1, 130.7 (q, *J* = 33.0 Hz), 127.3, 123.2 (q, *J* = 272.4 Hz), 122.0, 120.7, 118.5, 118.3, 117.4 – 116.5 (m). UV (λ<sub>max</sub> nm): 265; IR ν<sub>max</sub> (cm<sup>-1</sup>): 3302, 1651, 1544, 1230; HRMS (ESI): calcd for C<sub>15</sub>H<sub>9</sub>ClF<sub>6</sub>NO<sub>2</sub> [M+H]<sup>+</sup>: 384.0221, found: 384.0202.

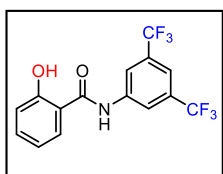

**N-(3,5-bis(trifluoromethyl)phenyl)-3-hydroxybenzamide (6):** The title compound was synthesized following the general procedure for synthesis of N-aryl-2-hydroxybenzamides to afford **6** as a white solid (76 mg, 34%). NMR spectra match those previously reported.<sup>1</sup>

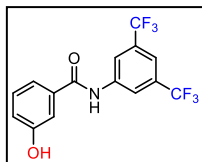

**N-(3,5-bis(trifluoromethyl)phenyl)-4-hydroxybenzamide (7):** The title compound was synthesized following the general procedure for synthesis of N-aryl-2-hydroxybenzamides to afford **7** as a white solid (34 mg, 23%). <sup>1</sup>H NMR (400 MHz, *d*<sub>6</sub>-DMSO): 10.76 (s, 1H), 9.86 (s, 1H), 8.53 (d, *J* = 1.8 Hz, 2H), 7.81 (s, 1H), 7.43 (dt, *J* = 7.6, 1.3 Hz, 1H), 7.40 – 7.33 (m, 2H), 7.03 (ddd, *J* = 7.9, 2.4, 1.1 Hz, 1H). <sup>13</sup>C NMR (100 MHz, *d*<sub>6</sub>-DMSO): 166.3, 157.5, 141.2, 135.3, 130.6 (q, *J* = 32.8 Hz), 129.7, 123.3 (d, *J* = 272.6 Hz), 119.8 (q, *J* = 3.4 Hz), 119.3, 118.3, 116.4 (q, *J* = 7.3 Hz), 114.6. UV (λ<sub>max</sub> nm): 274; IR ν<sub>max</sub> (cm<sup>-1</sup>): 3080, 1564, 1509, 1220; HRMS (ESI): calcd for C<sub>14</sub>H<sub>13</sub>ClNO<sub>3</sub> [M+H]<sup>+</sup>: 278.0578, found: 278.0596.

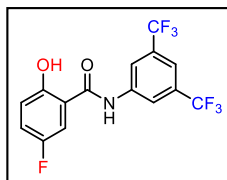

**N-(3,5-bis(trifluoromethyl)phenyl)-5-fluoro-2-hydroxybenzamide (8):** The title compound was synthesized following the general procedure for synthesis of N-aryl-2-hydroxybenzamides to afford **8** as a white solid (36 mg, 44%). <sup>1</sup>H NMR (400 MHz, *d*<sub>6</sub>-Acetone): 8.49 (s, 2H), 7.86 (dd, *J* = 9.5, 3.1 Hz, 1H), 7.82 (s, 1H), 7.33 (ddd, *J* = 9.2, 7.8, 3.1 Hz, 1H), 7.14 – 7.01 (m, 1H). <sup>13</sup>C NMR (100 MHz, *d*<sub>6</sub>-Acetone): 168.2, 157.8, 156.2 (d, *J* = 236.1 Hz), 141.0, 132.6 (q, *J* = 33.3 Hz), 125.7 (t, *J* = 272.7, 271.5 Hz), 122.8 (d, *J* = 23.6 Hz), 121.8 (d, *J* = 4.1 Hz), 120.3 (d, *J* = 7.7 Hz), 118.3 (p, *J* = 4.0 Hz), 116.8 (d, *J* = 6.8 Hz), 114.8 (d, *J* = 24.7 Hz). UV (λ<sub>max</sub> nm): 257; IR ν<sub>max</sub> (cm<sup>-1</sup>): 3252, 1648, 1544, 1110; HRMS (ESI): calcd for C<sub>15</sub>H<sub>9</sub>F<sub>7</sub>NO<sub>2</sub> [M+H]<sup>+</sup>: 368.0516, found: 368.0501.

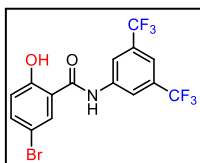

**N-(3,5-bis(trifluoromethyl)phenyl)-5-bromo-2-hydroxybenzamide (9):** The title compound was synthesized following the general procedure for synthesis of N-aryl-2-hydroxybenzamides to afford **9** as a white solid (56 mg, 26%). NMR spectra match those previously reported.<sup>2</sup>

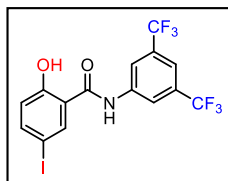

**N-(3,5-bis(trifluoromethyl)phenyl)-2-hydroxy-5-iodobenzamide (10):** The title compound was synthesized following the general procedure for synthesis of N-aryl-2-hydroxybenzamides to afford **10** as a white solid (53 mg, 13%). **<sup>1</sup>H NMR (400 MHz, *d*<sub>6</sub>-DMSO):** 11.46 (s, 1H), 10.59 (s, 1H), 8.08 (d, *J* = 2.3 Hz, 1H), 8.00 (d, *J* = 1.7 Hz, 2H), 7.71 (dd, *J* = 8.7, 2.3 Hz, 1H), 7.59 (t, *J* = 1.7 Hz, 1H), 6.83 (d, *J* = 8.6 Hz, 1H). **<sup>13</sup>C NMR (100 MHz, *d*<sub>6</sub>-DMSO):** 165.5, 157.3, 141.8, 140.3, 137.2, 130.7 (q, *J* = 32.8 Hz), 123.3 (q, *J* = 272.8 Hz), 121.2, 120.4 (q, *J* = 4.3 Hz), 119.8, 117.1 – 116.7 (m), 81.0. **UV**( $\lambda_{\max}$  nm): 264; **IR** $\nu_{\max}$  (cm<sup>-1</sup>): 3117, 1552, 1271, 1135; **HRMS (ESI):** calcd for C<sub>15</sub>H<sub>9</sub>F<sub>6</sub>INO<sub>2</sub> [M+H]<sup>+</sup>: 475.9577, found: 475.9554

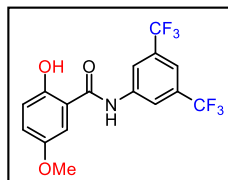

**N-(3,5-bis(trifluoromethyl)phenyl)-2-hydroxy-5-methoxybenzamide (11):** The title compound was synthesized following the general procedure for synthesis of N-aryl-2-hydroxybenzamides to afford **11** as a white solid (50 mg, 16%). **<sup>1</sup>H NMR (400 MHz, *d*<sub>6</sub>-DMSO):** 8.36 (s, 2H), 7.65 (s, 1H), 7.36 (d, *J* = 3.3 Hz, 1H), 6.89 (dd, *J* = 9.0, 3.3 Hz, 1H), 6.72 (d, *J* = 8.9 Hz, 1H), 3.69 (s, 3H). **<sup>13</sup>C NMR (100 MHz, *d*<sub>6</sub>-DMSO):** 167.3, 158.7, 149.1, 142.7, 130.6 (q, *J* = 32.6 Hz), 124.8 (q, *J* = 271.8 Hz), 121.1, 119.8, 119.7 (q, *J* = 5.1 Hz), 117.4, 114.7, 112.0, 55.5. **UV**( $\lambda_{\max}$  nm): 271; **IR** $\nu_{\max}$  (cm<sup>-1</sup>): 3256, 1662, 1551, 931; **HRMS (ESI):** calcd for C<sub>13</sub>H<sub>9</sub>BrF<sub>2</sub>NO<sub>2</sub> [M+H]<sup>+</sup>: 380.0716, found: 380.0710.

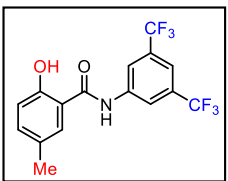

**N-(3,5-bis(trifluoromethyl)phenyl)-2-hydroxy-5-methylbenzamide (12):** The title compound was synthesized following the general procedure for synthesis of N-aryl-2-hydroxybenzamides to afford **12** as a white solid (66 mg, 11%). Spectral data was consistent with previous reports.<sup>2</sup>

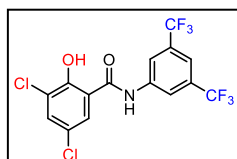

**N-(3,5-bis(trifluoromethyl)phenyl)-3,5-dichloro-2-hydroxybenzamide (14):** The title compound was synthesized following the general procedure for synthesis of N-aryl-2-hydroxybenzamides to afford **14** as a white solid (86 mg, 18%). **<sup>1</sup>H NMR (400 MHz, *d*<sub>6</sub>-DMSO):** 11.10 (s, 1H), 8.41 (t, *J* = 2.0 Hz, 2H), 8.01 (d, *J* = 2.5 Hz, 1H), 7.91 (s, 1H), 7.85 (d, *J* = 2.5 Hz, 1H). **<sup>13</sup>C NMR (100 MHz, *d*<sub>6</sub>-DMSO):** 166.6, 153.9, 139.8, 133.2, 130.7 (q, *J* = 32.9 Hz), 126.7, 123.2 (q, *J* = 272.8 Hz), 122.9, 122.6, 120.9 (q, *J* = 4.4 Hz), 119.7, 117.5 (q, *J* = 4.1 Hz). **UV**( $\lambda_{\max}$  nm): 264; **IR** $\nu_{\max}$  (cm<sup>-1</sup>): 3291, 1641, 1543, 1279, 1118; **HRMS (ESI):** calcd for C<sub>15</sub>H<sub>8</sub>Cl<sub>2</sub>F<sub>6</sub>NO<sub>2</sub> [M+H]<sup>+</sup>: 417.9831, found: 417.9837.

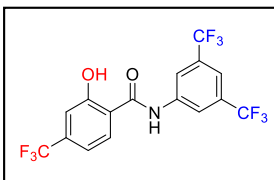

**N-(3,5-bis(trifluoromethyl)phenyl)-2-hydroxy-4-(trifluoromethyl)benzamide (15):** The title compound was synthesized following the general procedure for synthesis of N-aryl-2-hydroxybenzamides to afford **15** as a white solid (60 mg, 25%). **<sup>1</sup>H NMR (400 MHz, *d*<sub>6</sub>-DMSO):** 11.54 (s, 1H), 10.98 (s, 1H), 8.45 (s, 2H), 7.92 (d, *J* = 8.0 Hz, 1H), 7.85 (s, 1H), 7.31 (d, *J* = 7.9 Hz, 2H). **<sup>13</sup>C NMR (100 MHz, *d*<sub>6</sub>-DMSO):** 165.4, 156.8, 140.4, 132.7 (q, *J* = 31.7 Hz), 130.9, 130.8 (q, *J* = 32.8 Hz), 124.2, 123.6 (q, *J* = 272.8 Hz), 123.3 (q, *J* = 272.8 Hz), 120.0 (d, *J* = 4.3 Hz), 116.9 (m), 115.4 (q, *J* = 3.7 Hz), 113.4 (q, *J* = 4.0 Hz). **UV**( $\lambda_{\max}$  nm): 268; **IR** $\nu_{\max}$  (cm<sup>-1</sup>): 3221, 1645, 1129, 700; **HRMS (ESI):** calcd for C<sub>16</sub>H<sub>9</sub>F<sub>9</sub>NO<sub>2</sub> [M+H]<sup>+</sup>: 418.0484, found: 418.0506.



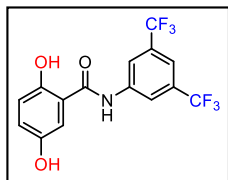

**N-(3,5-bis(trifluoromethyl)phenyl)-2,5-dihydroxybenzamide (16):**

The title compound was synthesized following the general procedure for synthesis of N-aryl-2-hydroxybenzamides to afford **16** as a white solid (70 mg, 26%). <sup>1</sup>H NMR (400 MHz, *d*<sub>6</sub>-DMSO): 11.04 (s, 1H), 8.41 (s, 1H), 7.82 (s, 1H), 7.17 (t, *J* = 8.2 Hz, 1H), 6.43 (d, *J* = 8.2 Hz, 2H). <sup>13</sup>C NMR (100 MHz, *d*<sub>6</sub>-DMSO): 167.8, 158.3, 140.3, 132.9, 130.8 (q, *J* = 32.8 Hz), 123.3 (q, *J* = 272.8 Hz), 120.4, 120.4, 116.8, (q, *J* = 4.2 Hz), 116.7, 107.5, 107.1. UV(λ<sub>max</sub> nm): 275; IR<sub>vmax</sub> (cm<sup>-1</sup>): 3325, 1644, 1445, 974. HRMS (ESI): calcd for C<sub>15</sub>H<sub>10</sub>F<sub>6</sub>NO<sub>3</sub> [M+H]<sup>+</sup>: 366.0559, found: 366.0541.

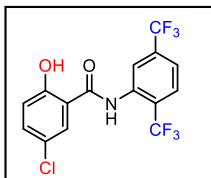

**N-(2,5-bis(trifluoromethyl)phenyl)-5-chloro-2-hydroxybenzamide (17):**

The title compound was synthesized following the general procedure for synthesis of N-aryl-2-hydroxybenzamides to afford **17** as a white solid (47 mg, 35%). <sup>1</sup>H NMR (400 MHz, *d*<sub>6</sub>-DMSO): 12.39 (s, 1H), 11.09 (s, 1H), 8.74 (d, *J* = 2.0 Hz, 1H), 8.02 (d, *J* = 8.3 Hz, 1H), 7.97 (d, *J* = 2.8 Hz, 1H), 7.75 (d, *J* = 8.2 Hz, 1H), 7.53 (dd, *J* = 8.8, 2.8 Hz, 1H), 7.07 (d, *J* = 8.8 Hz, 1H). <sup>13</sup>C NMR (100 MHz, *d*<sub>6</sub>-DMSO): 163.7, 156.0, 136.8, 134.3, 133.6 (q, *J* = 32.4 Hz), 130.4, 128.6–128.1 (m), 124.0, 123.7 (q, *J* = 273.1 Hz), 123.6 (q, *J* = 273.1 Hz), 122.1–121.7 (m), 119.5, 119.5. UV(λ<sub>max</sub> nm): 264; IR<sub>vmax</sub> (cm<sup>-1</sup>): 3291, 1640, 1542, 1120; HRMS (ESI): calcd for C<sub>15</sub>H<sub>9</sub>ClF<sub>6</sub>NO<sub>2</sub> [M+H]<sup>+</sup>: 384.0220, found: 384.0209.

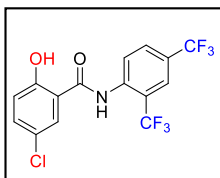

**N-(2,4-bis(trifluoromethyl)phenyl)-5-chloro-2-hydroxybenzamide (18):**

The title compound was synthesized following the general procedure for synthesis of N-aryl-2-hydroxybenzamides to afford **18** as a white solid (78 mg, 14%). <sup>1</sup>H NMR (400 MHz, *d*<sub>6</sub>-DMSO): 12.43 (s, 1H), 11.18 (s, 1H), 8.64 (d, *J* = 8.8 Hz, 1H), 8.14 (d, *J* = 8.8 Hz, 1H), 8.07 (s, 1H), 7.97 (d, *J* = 2.8 Hz, 1H), 7.54 (d, *J* = 8.7 Hz, 1H), 7.07 (d, *J* = 8.7 Hz, 1H). <sup>13</sup>C NMR (100 MHz, *d*<sub>6</sub>-DMSO): 162.9, 155.4, 139.2, 134.0, 130.6 (q, *J* = 3.7 Hz), 130.1, 125.1, 124.7 (q, *J* = 33.3 Hz), 123.7, 123.5 (m), 123.48 (q, *J* = 272.0 Hz), 123.15 (q, *J* = 273.4 Hz), 119.67 (q, *J* = 30.6 Hz), 119.21, 119.12. UV(λ<sub>max</sub> nm): 294; IR<sub>vmax</sub> (cm<sup>-1</sup>): 3221, 1645, 1118, 655; HRMS (ESI): calcd for C<sub>15</sub>H<sub>9</sub>ClF<sub>6</sub>NO<sub>2</sub> [M+H]<sup>+</sup>: 384.0221, found: 384.0249.

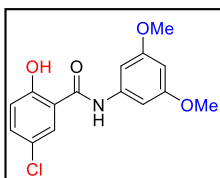

**5-chloro-N-(3,5-dimethoxyphenyl)-2-hydroxybenzamide (19):**

The title compound was synthesized following the general procedure for synthesis of N-aryl-2-hydroxybenzamides to afford **19** as a white solid (37 mg, 17%). <sup>1</sup>H NMR (400 MHz, *d*<sub>6</sub>-DMSO): 10.46 (s, 1H), 7.90 (d, *J* = 2.7 Hz, 1H), 7.45 (dd, *J* = 8.8, 2.7 Hz, 1H), 7.03–6.94 (m, 3H), 6.30 (t, *J* = 2.2 Hz, 1H), 3.74 (s, 6H). <sup>13</sup>C NMR (100 MHz, *d*<sub>6</sub>-DMSO): 164.9, 160.5, 157.0, 139.9, 133.0, 128.5, 122.5, 119.9, 119.2, 98.9, 96.3, 55.2. UV(λ<sub>max</sub> nm): 280; IR<sub>vmax</sub> (cm<sup>-1</sup>): 2939, 1601, 1153, 824; HRMS (ESI): calcd for C<sub>15</sub>H<sub>15</sub>ClNO<sub>4</sub> [M+H]<sup>+</sup>: 308.0684, found: 308.0691.

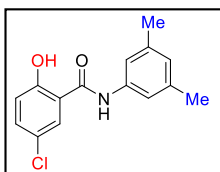

**5-chloro-N-(3,5-dimethylphenyl)-2-hydroxybenzamide (20):**

The title compound was synthesized following the general procedure for synthesis of N-aryl-2-hydroxybenzamides to afford **20** as a white solid (81 mg, 42%). Spectral data was consistent with previous reports.<sup>1</sup>

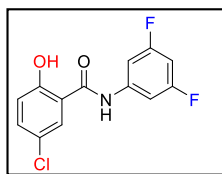

***N*-(3,5-difluorophenyl)-5-chloro-2-hydroxybenzamide (21):** The title compound was synthesized following the general procedure for synthesis of *N*-aryl-2-hydroxybenzamides to afford **21** as a white solid (138 mg, 70%). **<sup>1</sup>H NMR (400 MHz, *d*<sub>6</sub>-DMSO):** 11.45 (s, 1H), 10.61 (s, 1H), 7.81 (d, *J* = 2.7 Hz, 1H), 7.55 – 7.43 (m, 3H), 7.06 – 6.95 (m, 2H). **<sup>13</sup>C NMR (100 MHz, *d*<sub>6</sub>-DMSO):** 165.0, 162.4 (dd, *J* = 243.2, 15.3 Hz), 156.0, 140.8 (t, *J* = 13.8 Hz), 133.1, 128.7, 122.8, 120.6, 119.0, 103.3 (dd, *J* = 21.4, 9.4 Hz), 99.2 (t, *J* = 26.1 Hz). **UV**(λ<sub>max</sub> nm): 242; **IR**<sub>v<sub>max</sub></sub> (cm<sup>-1</sup>): 3100, 1613, 1118, 652; **HRMS (ESI):** calcd for C<sub>13</sub>H<sub>9</sub>ClF<sub>2</sub>NO<sub>2</sub> [M+H]<sup>+</sup>:284.0284, found: 284.0276.

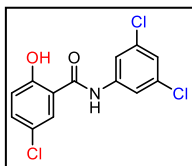

**5-chloro-*N*-(3,5-dichlorophenyl)-2-hydroxybenzamide (22):** The title compound was synthesized following the general procedure for synthesis of *N*-aryl-2-hydroxybenzamides to afford **22** as a white solid (56 mg, 28%). Spectral data was consistent with previous reports.<sup>2</sup>

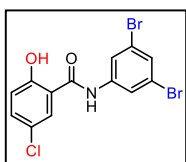

**5-chloro-*N*-(3,5-dibromophenyl)-2-hydroxybenzamide (23):** The title compound was synthesized following the general procedure for synthesis of *N*-aryl-2-hydroxybenzamides to afford **23** as a white solid (81 mg, 42%). Spectral data was consistent with previous reports. **<sup>1</sup>H NMR (400 MHz, *d*<sub>6</sub>-DMSO):** 11.41 (br s, 1H), 10.72 (br s, 1H), 7.92 – 10.68 (m, 3H), 7.46 (dd, *J* = 8.7, 2.8 Hz, 1H), 7.37 (d, *J* = 2.5 Hz, 1H), 7.02 (dd, *J* = 8.8, 3.3 Hz, 1H). **<sup>13</sup>C NMR (100 MHz, *d*<sub>6</sub>-DMSO):** 165.1, 156.4, 156.3, 140.9, 133.1, 128.6, 122.8, 122.3, 121.8, 119.0. **UV**(λ<sub>max</sub> nm): 266; **IR**<sub>v<sub>max</sub></sub> (cm<sup>-1</sup>): 3168, 1636, 1580, 1420; **HRMS (ESI):** calcd for C<sub>13</sub>H<sub>9</sub>Br<sub>2</sub>ClNO<sub>2</sub> [M-H]<sup>-</sup>:401.8537, found: 401.8529.

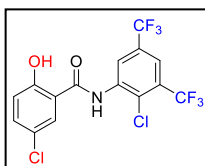

***N*-(2-chloro-3,5-bis(trifluoromethyl)phenyl)-5-chloro-2-hydroxybenzamide (24):** The title compound was following the general procedure for synthesis of *N*-aryl-2-hydroxybenzamides to afford **24** as a white solid (160 mg, 7%). **<sup>1</sup>H NMR (400 MHz, *d*<sub>6</sub>-DMSO):** 12.51 (s, 1H), 11.36 (s, 1H), 9.14 (d, *J* = 2.2 Hz, 1H), 7.98 (dd, *J* = 8.0, 2.5 Hz, 2H), 7.56 (dd, *J* = 8.8, 2.8 Hz, 1H), 7.11 (d, *J* = 8.8 Hz, 1H). **<sup>13</sup>C NMR (101 MHz, Methanol-*d*<sub>4</sub>)** δ 164.9, 156.5, 139.9, 135.1, 131.8, 130.9 (q, *J* = 34.0 Hz), 130.8 (q, *J* = 32.1 Hz), 129.9, 129.2, 126.4, 124.5 (q, *J* = 271.7 Hz), 123.7 (q, *J* = 273.0 Hz), 123.0 (q, *J* = 3.9 Hz), 120.69, 119.56. **UV**(λ<sub>max</sub> nm): 216; **IR**<sub>v<sub>max</sub></sub> (cm<sup>-1</sup>): 3297, 3183, 1642, 1132; **HRMS (ESI):** calcd for C<sub>15</sub>H<sub>8</sub>Cl<sub>2</sub>F<sub>6</sub>NO<sub>2</sub> [M+H]<sup>+</sup>: 417.9831, found: 417.9830.

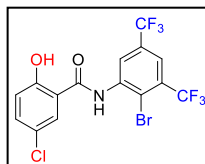

***N*-(2-bromo-3,5-bis(trifluoromethyl)phenyl)-5-chloro-2-hydroxybenzamide (25):** The title compound was synthesized following the general procedure for synthesis of *N*-aryl-2-hydroxybenzamides to afford **25** as a white solid (33 mg, 10%). **<sup>1</sup>H NMR (400 MHz, *d*<sub>6</sub>-DMSO):** 12.45 (s, 1H), 11.25 (s, 1H), 9.02 (d, *J* = 2.2 Hz, 1H), 7.95 (dd, *J* = 21.9, 2.5 Hz, 2H), 7.54 (dd, *J* = 8.8, 2.9 Hz, 1H), 7.11 (d, *J* = 8.8 Hz, 1H). **<sup>13</sup>C NMR (100 MHz, *d*<sub>6</sub>-DMSO):** 163.2, 155.6, 139.9, 134.0, 130.8 (q, *J* = 31.4 Hz), 130.0, 129.1 (q, *J* = 33.3 Hz), 123.7, 123.1 (q, *J* = 272.87 Hz), 122.9 (qz, *J* = 3.8 Hz), 122.3 (q, *J* = 274.15 Hz), 119.2 (q, *J* = 3.3 Hz), 116.4. **UV**(λ<sub>max</sub> nm):

270; IR<sub>v</sub>max (cm<sup>-1</sup>): 3240, 3191, 3117, 3094, 2461, 1672; HRMS (ESI): calcd for C<sub>15</sub>H<sub>8</sub>BrClF<sub>6</sub>NO<sub>2</sub> [M+H]<sup>+</sup>: 461.9326, found: 461.9307.

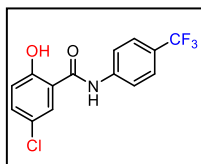

**5-chloro-2-hydroxy-N-(4-(trifluoromethyl)phenyl)benzamide (26):** The title compound was synthesized following the general procedure for synthesis of N-aryl-2-hydroxybenzamides to afford **26** as a white solid (81 mg, 40%). Spectral data was consistent with previous reports.<sup>3</sup>

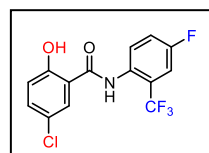

**5-chloro-N-(4-fluoro-2-(trifluoromethyl)phenyl)-2-hydroxybenzamide (27):** The title compound was synthesized following the general procedure for synthesis of N-aryl-2-hydroxybenzamides to afford **27** as a white solid (56 mg, 41%). <sup>1</sup>H NMR (400 MHz, *d*<sub>6</sub>-DMSO): 10.82 (s, 1H), 8.15 (dd, *J* = 9.0, 5.1 Hz, 1H), 7.96 (d, *J* = 2.8 Hz, 1H), 7.67 – 7.55 (m, 2H), 7.47 (dd, *J* = 8.8, 2.8 Hz, 1H), 7.04 (d, *J* = 8.8 Hz, 1H). <sup>13</sup>C NMR (100 MHz, *d*<sub>6</sub>-DMSO): 164.1, 159.01 (d, *J* = 244.7 Hz), 156.8, 134.0, 132.0, 130.0, 129.5 (d, *J* = 8.1 Hz), 123.5 (qd, *J* = 30.5, 8.1 Hz), 123.5, 123.3 (qd, *J* = 273.5, 2.6 Hz), 120.5 (d, *J* = 21.9 Hz), 119.6, 119.3, 114.0 (dq, *J* = 26.5, 5.0 Hz). UV(λ<sub>max</sub> nm): 264; IR<sub>v</sub>max (cm<sup>-1</sup>): 3292, 1638, 1542, 1278, 1114; HRMS (ESI): calcd for C<sub>14</sub>H<sub>9</sub>ClF<sub>4</sub>NO<sub>2</sub> [M+H]<sup>+</sup>: 334.0264, found: 334.0252.

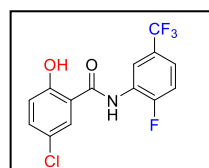

**N-(2-fluoro-5-(trifluoromethyl)phenyl)-5-chloro-2-hydroxybenzamide (28):** The title compound was synthesized following the general procedure for synthesis of N-aryl-2-hydroxybenzamides to afford **28** as a white solid (41 mg, 18%). <sup>1</sup>H NMR (400 MHz, *d*<sub>6</sub>-DMSO): 12.28 (s, 1H), 10.90 (d, *J* = 2.6 Hz, 1H), 8.70 (d, *J* = 7.0 Hz, 1H), 7.94 (d, *J* = 2.8 Hz, 1H), 7.58 (d, *J* = 7.8 Hz, 2H), 7.51 (dd, *J* = 8.7, 2.8 Hz, 1H), 7.06 (d, *J* = 8.8 Hz, 1H). <sup>13</sup>C NMR (100 MHz, *d*<sub>6</sub>-DMSO): 163.2, 155.5, 154.7 (d, *J* = 249.6 Hz), 133.7, 129.7, 127.2 (d, *J* = 11.5 Hz), 125.7 (d, *J* = 3.2 Hz), 125.4 (d, *J* = 3.5 Hz), 123.8 (q, *J* = 272.3 Hz), 123.6, 122.3 (q, *J* = 5.0 Hz), 119.5, 119.2, 116.6 (d, *J* = 20.9 Hz). UV(λ<sub>max</sub> nm): 216; IR<sub>v</sub>max (cm<sup>-1</sup>): 3270, 3075, 2920, 2850, 1670; HRMS (ESI): calcd for C<sub>14</sub>H<sub>9</sub>ClF<sub>4</sub>NO<sub>2</sub> [M+H]<sup>+</sup>: 334.0252, found: 334.0234.

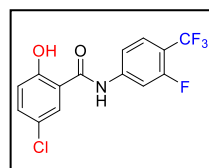

**5-chloro-N-(3-fluoro-4-(trifluoromethyl)phenyl)-2-hydroxybenzamide (29):** The title compound was synthesized following the general procedure for synthesis of N-aryl-2-hydroxybenzamides to afford **29** as a white solid (21 mg, 9%). <sup>1</sup>H NMR (400 MHz, *d*<sub>6</sub>-DMSO): 11.44 (s, 1H), 10.86 – 10.81 (m, 1H), 7.96 (d, *J* = 13.4 Hz, 1H), 7.79 (dd, *J* = 15.3, 5.8 Hz, 2H), 7.67 (d, *J* = 8.8 Hz, 1H), 7.48 (d, *J* = 8.8 Hz, 1H), 7.04 (d, *J* = 8.8 Hz, 1H). <sup>13</sup>C NMR (100 MHz, *d*<sub>6</sub>-DMSO): 165.1, 159.1 (d, *J* = 249.5 Hz), 155.9, 144.2 (d, *J* = 11.3 Hz), 133.1, 128.8, 127.9 (qd, *J* = 6.8, 4.5 Hz), 122.9, 122.8 (q, *J* = 271.0 Hz), 120.8, 119.0, 115.9 (d, *J* = 3.1 Hz), 111.3 (dd, *J* = 32.7, 12.5 Hz), 107.8 (d, *J* = 25.4 Hz). UV(λ<sub>max</sub> nm): 268; IR<sub>v</sub>max (cm<sup>-1</sup>): 2924, 1606, 1122, 695; HRMS (ESI): calcd for C<sub>14</sub>H<sub>9</sub>ClF<sub>4</sub>NO<sub>2</sub> [M+H]<sup>+</sup>: 334.0252, found: 334.0232.

**5-chloro-2-hydroxy-N-(4-methyl-3-(trifluoromethyl)phenyl)benzamide (30):** The title compound was synthesized following the general procedure for synthesis of N-aryl-2-hydroxybenzamides to afford **30** as a white solid (138 mg, 70%). <sup>1</sup>H NMR (400 MHz, *d*<sub>6</sub>-DMSO):

11.66 (s, 1H), 10.55 (s, 1H), 8.12 (d,  $J = 2.4$  Hz, 1H), 7.92 (d,  $J = 2.7$  Hz, 1H), 7.88 – 7.81 (m, 1H), 7.51 – 7.41 (m, 2H), 7.02 (d,  $J = 8.8$  Hz, 1H), 2.42 (s, 3H).  $^{13}\text{C}$  NMR (100 MHz,  $d_6$ -DMSO): 165.3, 156.8, 136.4, 133.2, 132.7, 131.4 (q,  $J = 1.6$  Hz), 128.4, 127.5 (q,  $J = 29.3$  Hz), 124.4 (q,  $J = 276.98$  Hz), 124.1, 122.8, 119.7, 119.1, 117.7 (q,  $J = 6.0$  Hz), 18.3 (q,  $J = 2.1$  Hz). UV( $\lambda_{\text{max}}$  nm): 248; IR $_{\text{vmax}}$  ( $\text{cm}^{-1}$ ): 3145, 1628, 1108, 819; HRMS (ESI): calcd for  $\text{C}_{15}\text{H}_{12}\text{ClF}_3\text{NO}_2$  [ $\text{M}+\text{H}$ ] $^+$ : 330.0503, found: 330.0504.

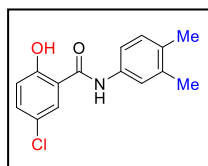

**5-chloro-*N*-(3,4-dimethylphenyl)-2-hydroxybenzamide (31):** The title compound was synthesized following the general procedure for synthesis of *N*-aryl-2-hydroxybenzamides to afford **31** as a white solid (49 mg, 26%).  $^1\text{H}$  NMR (400 MHz,  $d_6$ -DMSO): 12.00 (s, 1H), 10.29 (s, 1H), 7.99 (d,  $J = 2.7$  Hz, 1H), 7.54 – 7.35 (m, 3H), 7.12 (d,  $J = 8.1$  Hz, 1H), 7.01 (d,  $J = 8.8$  Hz, 1H), 2.22 (s, 3H), 2.20 (s, 3H).  $^{13}\text{C}$  NMR (100 MHz,  $d_6$ -DMSO): 165.0, 157.2, 136.5, 135.6, 133.1, 132.3, 129.7, 128.3, 122.7, 122.1, 119.2, 119.2, 118.4, 19.6, 18.9. UV( $\lambda_{\text{max}}$  nm): 248; IR $_{\text{vmax}}$  ( $\text{cm}^{-1}$ ): 3091, 1627, 1227, 677; HRMS (ESI): calcd for  $\text{C}_{15}\text{H}_{15}\text{ClNO}_2$  [ $\text{M}+\text{H}$ ] $^+$ : 276.0786, found: 276.0779.

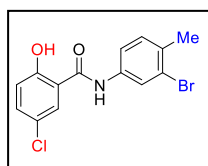

***N*-(3-bromo-4-methylphenyl)-5-chloro-2-hydroxybenzamide (32):** The title compound was synthesized following the general procedure for synthesis of *N*-aryl-2-hydroxybenzamides to afford **32** as a white solid (143 mg, 60%).  $^1\text{H}$  NMR (400 MHz,  $d_6$ -DMSO): 10.45 (s, 1H), 8.06 (d,  $J = 2.1$  Hz, 1H), 7.91 (d,  $J = 2.7$  Hz, 1H), 7.57 (dd,  $J = 8.3, 2.2$  Hz, 1H), 7.46 (dd,  $J = 8.8, 2.7$  Hz, 1H), 7.35 (d,  $J = 8.3$  Hz, 1H), 7.01 (d,  $J = 8.8$  Hz, 1H), 2.32 (s, 3H).  $^{13}\text{C}$  NMR (100 MHz,  $d_6$ -DMSO): 165.0, 156.8, 137.3, 133.1, 132.9, 131.0, 128.4, 123.8, 123.7, 122.7, 119.9, 119.7, 119.1, 21.8. UV( $\lambda_{\text{max}}$  nm): 270; IR $_{\text{vmax}}$  ( $\text{cm}^{-1}$ ): 2980, 1624, 1223, 678; HRMS (ESI): calcd for  $\text{C}_{14}\text{H}_{12}\text{BrClNO}_2$  [ $\text{M}+\text{H}$ ] $^+$ : 339.9734, found: 339.9717.

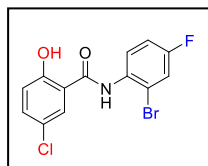

***N*-(2-bromo-4-fluorophenyl)-5-chloro-2-hydroxybenzamide (33):** The title compound was synthesized following the general procedure for synthesis of *N*-aryl-2-hydroxybenzamides to afford **33** as a white solid (83 mg, 35%).  $^1\text{H}$  NMR (400 MHz,  $d_6$ -DMSO): 12.25 (s, 1H), 10.70 (s, 1H), 8.23 (dd,  $J = 9.1, 5.8$  Hz, 1H), 7.99 (d,  $J = 2.7$  Hz, 1H), 7.72 (dd,  $J = 8.3, 2.9$  Hz, 1H), 7.51 (dd,  $J = 8.8, 2.8$  Hz, 1H), 7.34 (ddd,  $J = 9.1, 8.2, 2.9$  Hz, 1H), 7.07 (d,  $J = 8.8$  Hz, 1H).  $^{13}\text{C}$  NMR (100 MHz,  $d_6$ -DMSO): 163.3, 158.5 (d,  $J = 246.1$  Hz), 155.9, 133.6, 133.0 (d,  $J = 3.2$  Hz), 129.5, 125.5 (d,  $J = 8.4$  Hz), 123.4, 119.8, 119.5, 119.1 (d,  $J = 5.1$  Hz), 115.9 (d,  $J = 9.9$  Hz), 115.3 (d,  $J = 21.8$  Hz). UV( $\lambda_{\text{max}}$  nm): 232; IR $_{\text{vmax}}$  ( $\text{cm}^{-1}$ ): 3163, 1634, 829, 649; HRMS (ESI): calcd for  $\text{C}_{13}\text{H}_9\text{BrClFNO}_2$  [ $\text{M}+\text{H}$ ] $^+$ : 343.9484, found: 343.9460.

***N*-(2-bromo-6-fluorophenyl)-5-chloro-2-hydroxybenzamide (34):** The title compound was synthesized following the general procedure for synthesis of *N*-aryl-2-hydroxybenzamides to afford **34** as a white solid (31 mg, 6.2%).  $^1\text{H}$  NMR (400 MHz,  $d_6$ -DMSO): 12.00 (s, 1H), 10.36 (s, 1H), 8.03 (s, 1H), 7.61 (d,  $J = 7.6$  Hz, 1H), 7.54 (d,  $J = 8.5$  Hz, 1H), 7.39 (dq,  $J = 15.9, 7.9, 7.4$  Hz, 2H), 7.05 (d,  $J = 8.8$  Hz, 1H).  $^{13}\text{C}$  NMR (100 MHz,  $d_6$ -DMSO): 165.3, 158.3 (d,  $J = 251.1$  Hz), 157.6, 134.0, 130.0 (d,  $J = 8.8$  Hz), 128.5, 128.4 (d,  $J = 3.4$  Hz), 124.5 (d,  $J = 15.6$  Hz), 123.1, 122.9, 119.5, 117.4, 115.7 (d,  $J = 20.9$  Hz). UV( $\lambda_{\text{max}}$  nm): 238; IR $_{\text{vmax}}$  ( $\text{cm}^{-1}$ ): 3193, 1631, 1520, 787; HRMS (ESI): calcd for  $\text{C}_{13}\text{H}_9\text{BrClFNO}_2$  [ $\text{M}+\text{H}$ ] $^+$ : 343.9484, found: 343.9467

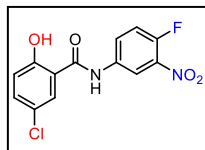

**5-chloro-N-(4-fluoro-3-nitrophenyl)-2-hydroxybenzamide (35):** The title compound was synthesized following the general procedure for synthesis of N-aryl-2-hydroxybenzamides to afford **33** as a white solid (67 mg, 45%). **<sup>1</sup>H NMR (400 MHz, *d*<sub>6</sub>-DMSO):** 11.51 (s, 1H), 10.76 (s, 1H), 8.66 (dd, *J* = 6.9, 2.7 Hz, 1H), 8.05 (dt, *J* = 9.2, 3.3 Hz, 1H), 7.87 (d, *J* = 2.7 Hz, 1H), 7.62 (dd, *J* = 11.2, 9.1 Hz, 1H), 7.48 (dd, *J* = 8.8, 2.7 Hz, 1H), 7.03 (d, *J* = 8.8 Hz, 1H). **<sup>13</sup>C NMR (100 MHz, *d*<sub>6</sub>-DMSO):** 165.2, 156.4, 150.9 (d, *J* = 259.3 Hz), 136.4 (d, *J* = 7.6 Hz), 135.0 (d, *J* = 3.4 Hz), 133.1, 128.5, 128.0 (d, *J* = 8.3 Hz), 122.7, 120.2, 119.1, 118.9 (d, *J* = 21.8 Hz), 117.1 (d, *J* = 3.0 Hz). **UV**( $\lambda_{\text{max}}$  nm): 254 ; **IR** $\nu_{\text{max}}$  (cm<sup>-1</sup>): 3291, 1620, 1334, 932; **HRMS (ESI):** calcd for C<sub>13</sub>H<sub>9</sub>ClFNO<sub>4</sub> [M+H]<sup>+</sup>: 311.0229, found: 311.0241.

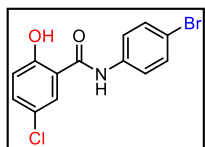

**N-(4-bromophenyl)-5-chloro-2-hydroxybenzamide (37):** The title compound was synthesized following the general procedure for synthesis of N-aryl-2-hydroxybenzamides to afford **37** as a white solid (71 mg, 52%). Spectral data was consistent with previous reports.<sup>4</sup>

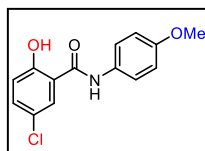

**5-chloro-2-hydroxy-N-(4-methoxyphenyl)benzamide (38):** The title compound was synthesized following the general procedure for synthesis of N-aryl-2-hydroxybenzamides to afford **38** as a white solid (81 mg, 42%). **<sup>1</sup>H NMR (400 MHz, *d*<sub>6</sub>-DMSO):** 12.03 (s, 1H), 10.33 (s, 1H), 7.99 (d, *J* = 2.7 Hz, 1H), 7.65 – 7.55 (m, 2H), 7.47 (dd, *J* = 8.8, 2.7 Hz, 1H), 7.00 (d, *J* = 8.8 Hz, 1H), 6.95 (d, *J* = 9.0 Hz, 2H), 3.75 (s, 3H). **<sup>13</sup>C NMR (100 MHz, *d*<sub>6</sub>-DMSO):** 165.1, 157.4, 156.1, 133.1, 130.8, 128.1, 122.7, 122.6, 119.2, 118.9, 113.9, 55.2. **UV**( $\lambda_{\text{max}}$  nm): 267; **IR** $\nu_{\text{max}}$  (cm<sup>-1</sup>): 3080, 1564, 1509, 1220; **HRMS (ESI):** calcd for C<sub>14</sub>H<sub>13</sub>ClNO<sub>3</sub> [M+H]<sup>+</sup>: 278.0578, found: 278.0578.

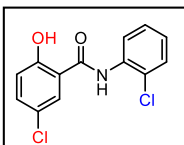

**5-chloro-N-(2-chlorophenyl)-2-hydroxybenzamide (39):**The title compound was synthesized) following the general procedure for synthesis of N-aryl-2-hydroxybenzamides to afford **39** as a white solid (110 mg, 56%). Spectral data was consistent with previous reports.<sup>3</sup>

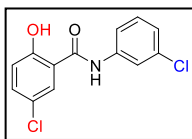

**5-chloro-N-(3-chlorophenyl)-2-hydroxybenzamide (40):**The title compound was synthesized following the general procedure for synthesis of N-aryl-2-hydroxybenzamides to afford **40** as a white solid (61 mg, 41%). Spectral data was consistent with previous reports.<sup>3</sup>

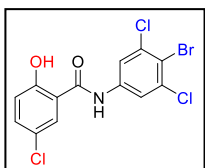

**N-(4-bromo-3,5-dichlorophenyl)-5-chloro-2-hydroxybenzamide (41):** The title compound was following the general procedure for synthesis of N-aryl-2-hydroxybenzamides to afford **41** as a white solid (53 mg, 19%). **<sup>1</sup>H NMR (400 MHz, *d*<sub>6</sub>-DMSO):** 11.43 (s, 1H), 10.60 (s, 1H), 8.03 (s, 2H), 7.81 (d, *J* = 2.7 Hz, 1H), 7.48 (dd, *J* = 8.8, 2.7 Hz, 1H), 7.03 (d, *J* = 8.8 Hz, 1H). **<sup>13</sup>C NMR (100 MHz, *d*<sub>6</sub>-DMSO):** 165.1, 156.0, 139.1, 135.1, 133.2, 128.7, 122.8, 120.5, 120.2, 119.0, 116.1. **UV**( $\lambda_{\text{max}}$  nm): 248; **IR** $\nu_{\text{max}}$  (cm<sup>-1</sup>): 3149, 1626, 1208, 655; **HRMS (ESI):** calcd for C<sub>13</sub>H<sub>8</sub>BrCl<sub>3</sub>NO<sub>2</sub> [M+H]<sup>+</sup>: 393.8799, found: 393.8808.



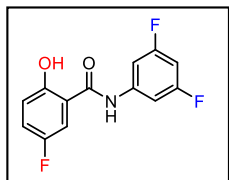

**N-(3,5-difluorophenyl)-5-fluoro-2-hydroxybenzamide (42):** The title compound was synthesized following the general procedure for synthesis of N-aryl-2-hydroxybenzamides to afford **42** as a white solid (53 mg, 29%). **<sup>1</sup>H NMR (400 MHz, *d*<sub>6</sub>-DMSO):** 11.30 (s, 1H), 10.62 (s, 1H), 7.62 (dd, *J* = 9.4, 3.2 Hz, 1H), 7.50 (ddd, *J* = 14.5, 9.5, 2.1 Hz, 2H), 7.31 (td, *J* = 8.5, 3.2 Hz, 1H), 7.02 (t, *J* = 4.7 Hz, 1H), 7.01 – 6.95 (m, 1H). **<sup>13</sup>C NMR (100 MHz, *d*<sub>6</sub>-DMSO):** 165.0 (d, *J* = 2.2 Hz), 162.4 (dd, *J* = 243.1, 15.2 Hz), 154.9 (d, *J* = 235.2 Hz), 153.5, 140.8 (t, *J* = 13.8 Hz), 120.5 (d, *J* = 23.2 Hz), 119.5 (d, *J* = 6.7 Hz), 118.5 (d, *J* = 7.5 Hz), 115.1 (d, *J* = 24.5 Hz), 103.3 (dd, *J* = 20.2, 8.0 Hz), 99.2 (t, *J* = 26.1 Hz). **UV**( $\lambda_{\max}$  nm): 267; **IR** $\nu_{\max}$  (cm<sup>-1</sup>): 3321, 1653, 1571, 971; **HRMS (ESI):** calcd for C<sub>13</sub>H<sub>9</sub>F<sub>3</sub>NO<sub>2</sub> [M+H]<sup>+</sup>: 268.0580, found: 268.0577.

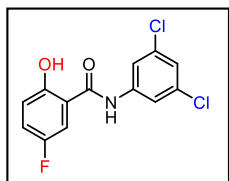

**N-(3,5-dichlorophenyl)-5-fluoro-2-hydroxybenzamide (43):** The title compound was synthesized following the general procedure for synthesis of N-aryl-2-hydroxybenzamides to afford **43** as a white solid (63 mg, 39%). **<sup>1</sup>H NMR (400 MHz, *d*<sub>6</sub>-DMSO):** 11.3 (s, 1H), 10.6 (s, 1H), 7.8 (d, *J* = 1.9 Hz, 2H), 7.6 (dd, *J* = 9.4, 3.2 Hz, 1H), 7.4 (t, *J* = 1.9 Hz, 1H), 7.3 (ddd, *J* = 9.0, 8.0, 3.2 Hz, 1H), 7.0 (dd, *J* = 9.0, 4.6 Hz, 1H). **<sup>13</sup>C NMR (100 MHz, *d*<sub>6</sub>-DMSO):** 165.5 (d, *J* = 2.2 Hz), 155.3 (d, *J* = 234.8 Hz), 154.2, 141.1, 134.5, 123.7, 121.0 (d, *J* = 23.3 Hz), 119.7 (d, *J* = 6.8 Hz), 119.0, 119.0 (d, *J* = 7.6 Hz), 115.5 (d, *J* = 24.5 Hz). **UV**( $\lambda_{\max}$  nm): 264; **IR** $\nu_{\max}$  (cm<sup>-1</sup>): 3232, 1648, 1547, 912; **HRMS (ESI):** calcd for C<sub>13</sub>H<sub>9</sub>Cl<sub>2</sub>FNO<sub>2</sub> [M+H]<sup>+</sup>: 299.9989, found: 299.9977.

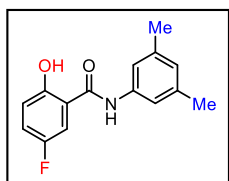

**N-(3,5-dimethylphenyl)-5-fluoro-2-hydroxybenzamide (44):** The title compound was synthesized following the general procedure for synthesis of N-aryl-2-hydroxybenzamides to afford **44** as a white solid (58 mg, 43%). **<sup>1</sup>H NMR (400 MHz, *d*<sub>6</sub>-DMSO):** 11.7 (s, 1H), 10.3 (s, 1H), 7.8 (dd, *J* = 9.8, 3.2 Hz, 1H), 7.3 (d, *J* = 1.4 Hz, 2H), 7.3 – 7.3 (m, 1H), 7.0 (dd, *J* = 9.0, 4.6 Hz, 1H), 6.8 (s, 1H), 2.3 (s, 6H). **<sup>13</sup>C NMR (100 MHz, *d*<sub>6</sub>-DMSO):** 165.3 (d, *J* = 2.5 Hz), 155.3 (d, *J* = 235.0 Hz), 154.9, 138.3 (d, *J* = 2.8 Hz), 126.3, 121.0, 120.8, 119.1 (d, *J* = 7.6 Hz), 119.0, 118.9 (d, *J* = 6.9 Hz), 115.2 (d, *J* = 24.4 Hz), 21.5. **UV**( $\lambda_{\max}$  nm): 271; **IR** $\nu_{\max}$  (cm<sup>-1</sup>): 3086, 1634, 1578, 912; **HRMS (ESI):** calcd for C<sub>15</sub>H<sub>15</sub>FNO<sub>2</sub> [M+H]<sup>+</sup>: 260.1081, found: 260.1064.

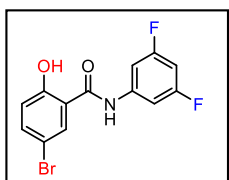

**5-bromo-N-(3,5-difluorophenyl)-2-hydroxybenzamide (45):** The title compound was synthesized following the general procedure for synthesis of N-aryl-2-hydroxybenzamides to afford **45** as a white solid (83 mg, 49%). **<sup>1</sup>H NMR (400 MHz, *d*<sub>6</sub>-DMSO):** 11.49 (s, 1H), 10.66 (s, 1H), 7.93 (d, *J* = 2.6 Hz, 1H), 7.58 (dd, *J* = 8.8, 2.6 Hz, 1H), 7.50 (qd, *J* = 6.7, 3.3 Hz, 2H), 7.08 – 6.93 (m, 2H). **<sup>13</sup>C NMR (100 MHz, *d*<sub>6</sub>-DMSO):** 164.8 (d, *J* = 13.0 Hz), 162.4 (dd, *J* = 243.1, 15.3 Hz), 156.5, 140.8 (d, *J* = 12.7 Hz), 135.8, 131.5, 121.1, 119.4, 110.1 (d, *J* = 2.8 Hz), 103.2 (dd, *J* = 29.3, 8.4 Hz), 99.2 (t, *J* = 26.1 Hz). **UV**( $\lambda_{\max}$  nm): 260; **IR** $\nu_{\max}$  (cm<sup>-1</sup>): 3192, 1644, 1552, 1117; **HRMS (ESI):** calcd for C<sub>13</sub>H<sub>9</sub>BrF<sub>2</sub>NO<sub>2</sub> [M+H]<sup>+</sup>: 327.9779, found: 327.9760.

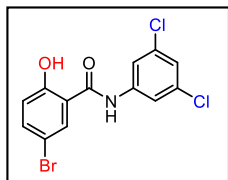

**5-bromo-N-(3,5-dichlorophenyl)-2-hydroxybenzamide (46):** The title compound was synthesized following the general procedure for synthesis of N-aryl-2-hydroxybenzamides to afford **46** as a white solid (53 mg, 43%). **<sup>1</sup>H NMR (400 MHz, *d*<sub>6</sub>-DMSO):** 11.48 (s, 1H), 10.67 (s, 1H), 7.93 (d, *J* = 2.6 Hz, 1H), 7.83 (d, *J* = 1.9 Hz, 2H), 7.57 (dd, *J* = 8.8, 2.6 Hz, 1H), 7.36 (t, *J* = 1.9 Hz, 1H), 6.96 (d, *J* = 8.8 Hz, 1H). **<sup>13</sup>C NMR (100 MHz, *d*<sub>6</sub>-DMSO):** 164.9, 156.6, 140.7, 140.5, 135.9, 134.1, 131.4, 123.3, 119.4, 118.6, 118.5, 110.1. **UV(λ<sub>max</sub> nm):** 263; **IR<sub>v</sub>max (cm<sup>-1</sup>):** 3131, 1621, 1476, 974; **HRMS (ESI):** calcd for C<sub>13</sub>H<sub>9</sub>BrCl<sub>2</sub>NO<sub>2</sub> [M+H]<sup>+</sup>: 359.9188, found: 359.9180.

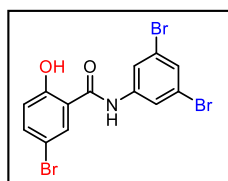

**5-bromo-N-(3,5-dibromophenyl)-2-hydroxybenzamide (47):** The title compound was synthesized following the general procedure for synthesis of N-aryl-2-hydroxybenzamides to afford **47** as a white solid (93 mg, 61%). **<sup>1</sup>H NMR (400 MHz, *d*<sub>6</sub>-DMSO):** 10.63 (s, 1H), 7.99 (d, *J* = 1.8 Hz, 2H), 7.95 (d, *J* = 2.5 Hz, 1H), 7.59 – 7.53 (m, 2H), 6.96 (d, *J* = 8.7 Hz, 1H). **<sup>13</sup>C NMR (100 MHz, *d*<sub>6</sub>-DMSO):** 165.0, 157.0, 141.0, 135.9, 131.4, 128.5, 122.3, 121.8, 120.6, 119.5, 110.0. **UV(λ<sub>max</sub> nm):** 273; **IR<sub>v</sub>max (cm<sup>-1</sup>):** 3275, 1644, 1542, 92; **HRMS (ESI):** calcd for C<sub>13</sub>H<sub>9</sub>Br<sub>3</sub>NO<sub>2</sub> [M+H]<sup>+</sup>: 447.8178, found: 447.8187.

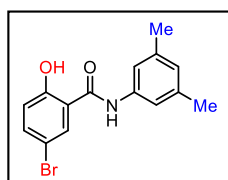

**5-bromo-N-(3,5-dimethylphenyl)-2-hydroxybenzamide (48):** The title compound was synthesized following the general procedure for synthesis of N-aryl-2-hydroxybenzamides to afford **48** as a white solid (51 mg, 34%). **<sup>1</sup>H NMR (400 MHz, *d*<sub>6</sub>-DMSO):** 12.0 (s, 1H), 10.3 (s, 1H), 8.1 (d, *J* = 2.5 Hz, 1H), 7.6 (dd, *J* = 8.7, 2.5 Hz, 1H), 7.3 (d, *J* = 1.7 Hz, 2H), 7.0 (d, *J* = 8.8 Hz, 1H), 6.8 (s, 1H), 2.3 (s, 6H). **<sup>13</sup>C NMR (100 MHz, *d*<sub>6</sub>-DMSO):** 165.2, 157.9, 138.3, 138.3, 136.3, 131.7, 126.3, 120.4, 120.0, 119.0, 110.5, 21.5. **UV(λ<sub>max</sub> nm):** 261; **IR<sub>v</sub>max (cm<sup>-1</sup>):** 3345, 1649, 1574, 1117. **HRMS (ESI):** calcd for C<sub>15</sub>H<sub>15</sub>BrNO<sub>2</sub> [M+H]<sup>+</sup>: 320.0281, found: 320.0260.

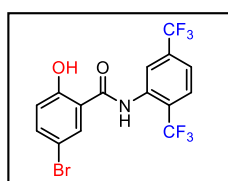

**5-bromo-N-(2,5-bis(trifluoromethyl)phenyl)-2-hydroxybenzamide (49):** The title compound was synthesized following the general procedure for synthesis of N-aryl-2-hydroxybenzamides to afford **49** as a white solid (53 mg, 29%). **<sup>1</sup>H NMR (400 MHz, *d*<sub>6</sub>-DMSO):** 11.19 (s, 1H), 8.74 (s, 1H), 8.10 (d, *J* = 2.7 Hz, 1H), 8.02 (d, *J* = 8.3 Hz, 1H), 7.75 (d, *J* = 8.7 Hz, 1H), 7.63 (dd, *J* = 8.8, 2.7 Hz, 1H), 7.02 (d, *J* = 8.7 Hz, 1H). **<sup>13</sup>C NMR (100 MHz, *d*<sub>6</sub>-DMSO):** 163.7, 156.0, 136.8, 134.3, 133.6 (q, *J* = 32.4 Hz), 130.4, 128.6 – 128.1 (m), 124.0, 123.7 (q, *J* = 273.1 Hz), 123.6 (q, *J* = 273.1 Hz), 122.1 – 121.7 (m), 119.5, 119.5. **UV(λ<sub>max</sub> nm):** 261; **IR<sub>v</sub>max (cm<sup>-1</sup>):** 3324, 1658, 1544, 970; **HRMS (ESI):** calcd for C<sub>15</sub>H<sub>9</sub>BrF<sub>6</sub>NO<sub>2</sub> [M+H]<sup>+</sup>: 427.9715, found: 427.9715.

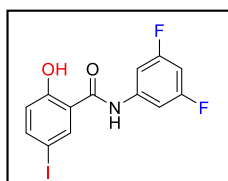

**N-(3,5-difluorophenyl)-2-hydroxy-5-iodobenzamide (50):** The title compound was synthesized following the general procedure for synthesis of N-aryl-2-hydroxybenzamides to afford **50** as a white solid (15 mg, 9%). **<sup>1</sup>H NMR (400 MHz, *d*<sub>6</sub>-DMSO):** 11.46 (s, 1H), 10.62 (s, 1H), 8.06 (d, *J* = 2.3 Hz, 1H), 7.71 (dd, *J* = 8.6, 2.3 Hz, 1H), 7.54 – 7.43 (m, 2H), 7.00 (dd, *J* = 10.6, 8.2 Hz, 1H), 6.84 (d, *J* = 8.6 Hz, 1H). **<sup>13</sup>C NMR (100 MHz, *d*<sub>6</sub>-DMSO):** 165.0, 162.5 (dd,

$J = 243.1, 15.2$  Hz), 157.1, 141.6, 140.9 (t,  $J = 13.9$  Hz), 137.3, 121.7, 119.8, 103.4 (dd,  $J = 19.3, 8.6$  Hz), 99.3 (t,  $J = 26.3$  Hz), 81.1. **UV** ( $\lambda_{\max}$  nm): 266; **IR** $\nu_{\max}$  ( $\text{cm}^{-1}$ ): 3088, 1616, 1121, 695; **HRMS (ESI)**: calcd for  $\text{C}_{13}\text{H}_9\text{F}_2\text{INO}_2$  [ $\text{M}+\text{H}$ ] $^+$ : 375.9641, found: 375.9616.

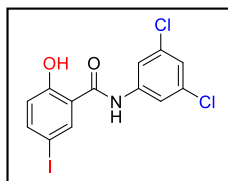

***N*-(3,5-dichlorophenyl)-2-hydroxy-5-iodobenzamide (51)**: The title compound was synthesized following the general procedure for synthesis of *N*-aryl-2-hydroxybenzamides to afford **51** as a white solid (200 mg, 13%).  **$^1\text{H}$  NMR (400 MHz,  $d_6$ -DMSO)**: 11.46 (s, 1H), 10.64 (s, 1H), 8.07 (d,  $J = 2.3$  Hz, 1H), 7.82 (d,  $J = 2.0$  Hz, 2H), 7.70 (dd,  $J = 8.6, 2.3$  Hz, 1H), 7.36 (d,  $J = 2.0$  Hz, 1H), 6.83 (d,  $J = 8.7$  Hz, 1H).  **$^{13}\text{C}$  NMR (100 MHz,  $d_6$ -DMSO)**: 165.1, 157.4, 141.6, 140.7, 137.2, 134.0, 123.2, 121.3, 119.8, 118.6, 80.8. **UV**( $\lambda_{\max}$  nm): 224; **IR** $\nu_{\max}$  ( $\text{cm}^{-1}$ ): 3310, 3075, 2920, 2850, 1628, 667; **HRMS (ESI)**: calcd for  $\text{C}_{13}\text{H}_9\text{Cl}_2\text{INO}_2$  [ $\text{M}+\text{H}$ ] $^+$ : 407.9050, found: 407.9024.

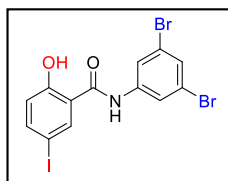

***N*-(3,5-dibromophenyl)-2-hydroxy-5-iodobenzamide (52)**: The title compound was synthesized following the general procedure for synthesis of *N*-aryl-2-hydroxybenzamides to afford **52** as a white solid (53 mg, 13%).  **$^1\text{H}$  NMR (400 MHz,  $d_6$ -DMSO)**: 11.46 (s, 1H), 10.59 (s, 1H), 8.08 (d,  $J = 2.3$  Hz, 1H), 8.00 (d,  $J = 1.7$  Hz, 2H), 7.71 (dd,  $J = 8.7, 2.3$  Hz, 1H), 7.59 (t,  $J = 1.7$  Hz, 1H), 6.83 (d,  $J = 8.6$  Hz, 1H).  **$^{13}\text{C}$  NMR (100 MHz,  $d_6$ -DMSO)**: 165.1, 158.6, 141.5, 141.2, 137.2, 128.4, 122.3, 121.7, 120.3, 79.9. **UV**( $\lambda_{\max}$  nm): 236; **IR** $\nu_{\max}$  ( $\text{cm}^{-1}$ ): 3079, 1636, 1109, 664; **HRMS (ESI)**: calcd for  $\text{C}_{13}\text{H}_9\text{Br}_2\text{INO}_2$  [ $\text{M}+\text{H}$ ] $^+$ : 495.8039, found: 495.8059.

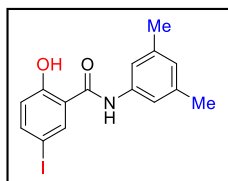

***N*-(3,5-dimethylphenyl)-2-hydroxy-5-iodobenzamide (53)**: The title compound was synthesized following the general procedure for synthesis of *N*-aryl-2-hydroxybenzamides to afford **53** as a white solid (67 mg, 40%).  **$^1\text{H}$  NMR (400 MHz,  $d_6$ -DMSO)**: 11.93 (s, 1H), 10.27 (s, 1H), 8.22 (d,  $J = 2.2$  Hz, 1H), 7.70 (dd,  $J = 8.6, 2.2$  Hz, 1H), 7.32 (s, 2H), 6.85 – 6.77 (m, 2H), 2.27 (s, 6H).  **$^{13}\text{C}$  NMR (100 MHz,  $d_6$ -DMSO)**: 164.9, 158.1, 141.6, 137.9, 137.8, 137.0, 125.9, 120.4, 120.0, 118.6, 81.0, 21.1. **UV**( $\lambda_{\max}$  nm): 238; **IR** $\nu_{\max}$  ( $\text{cm}^{-1}$ ): 2915, 1618, 1285, 836; **HRMS (ESI)**: calcd for  $\text{C}_{15}\text{H}_{15}\text{INO}_2$  [ $\text{M}+\text{H}$ ] $^+$ : 368.0142, found: 368.0121.

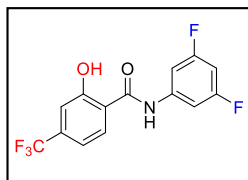

***N*-(3,5-difluorophenyl)-2-hydroxy-4-(trifluoromethyl)benzamide (54)**: The title compound was synthesized following the general procedure for synthesis of *N*-aryl-2-hydroxybenzamides to afford **54** as a white solid (191 mg, 50%).  **$^1\text{H}$  NMR (400 MHz,  $d_6$ -DMSO)**: 11.54 (s, 1H), 10.70 (s, 1H), 7.88 (d,  $J = 7.9$  Hz, 1H), 7.53 – 7.45 (m, 2H), 7.29 (d,  $J = 8.5$  Hz, 2H), 7.00 (tt,  $J = 9.4, 2.4$  Hz, 1H).  **$^{13}\text{C}$  NMR (100 MHz,  $d_6$ -DMSO)**: 164.9, 162.5 (dd,  $J = 243.2, 15.3$  Hz), 156.5, 141.0 (t,  $J = 13.7$  Hz), 132.5 (q,  $J = 31.8$  Hz), 130.8, 124.5, 123.6 (q,  $J = 272.7$  Hz), 115.5 (q,  $J = 3.8$  Hz), 113.3 (q,  $J = 3.9$  Hz), 103.0 (dd,  $J = 20.8, 8.9$  Hz), 99.2 (t,  $J = 26.2$  Hz). **UV**( $\lambda_{\max}$  nm): 268; **IR** $\nu_{\max}$  ( $\text{cm}^{-1}$ ): 3173, 1620, 1113, 841; **HRMS (ESI)**: calcd for  $\text{C}_{14}\text{H}_9\text{F}_5\text{NO}_2$  [ $\text{M}+\text{H}$ ] $^+$ : 318.0548, found: 318.0536.



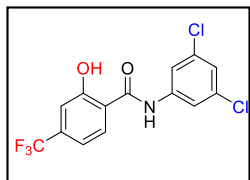

***N*-(3,5-dichlorophenyl)-2-hydroxy-4-(trifluoromethyl)benzamide (55):**

The title compound was synthesized following the general procedure for synthesis of *N*-aryl-2-hydroxybenzamides to afford **55** as a white solid (239 mg, 56%). **<sup>1</sup>H NMR (400 MHz, *d*<sub>6</sub>-DMSO):** 11.54 (s, 1H), 10.65 (s, 1H), 7.89 (d, *J* = 7.9 Hz, 1H), 7.84 (d, *J* = 1.9 Hz, 2H), 7.37 (t, *J* = 2.0 Hz, 1H), 7.29 (d, *J* = 8.7 Hz, 2H). **<sup>13</sup>C NMR (100 MHz, *d*<sub>6</sub>-DMSO):** 165.0, 156.6, 140.8, 134.1, 132.6 (q, *J* = 31.9 Hz), 130.8, 124.3, 123.6 (q, *J* = 272.8 Hz), 123.3, 118.3, 115.5 (q, *J* = 3.7 Hz), 113.3 (q, *J* = 4.0 Hz). **UV**(λ<sub>max</sub> nm): 270; **IR**<sub>vmax</sub> (cm<sup>-1</sup>): 3081, 1640, 1110, 664; **HRMS (ESI):** calcd for C<sub>14</sub>H<sub>9</sub>Cl<sub>2</sub>F<sub>3</sub>NO<sub>2</sub>[M+H]<sup>+</sup>: 349.9957, found: 349.9935.

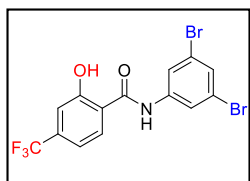

***N*-(3,5-dibromophenyl)-2-hydroxy-4-(trifluoromethyl)benzamide (56):**

The title compound was synthesized following the general procedure for synthesis of *N*-aryl-2-hydroxybenzamides to afford **56** as a white solid (37 mg, 14%). **<sup>1</sup>H NMR (400 MHz, *d*<sub>6</sub>-DMSO):** 11.53 (s, 1H), 10.66 (s, 1H), 8.01 (d, *J* = 1.8 Hz, 2H), 7.89 (d, *J* = 7.9 Hz, 1H), 7.59 (t, *J* = 1.7 Hz, 1H), 7.29 (d, *J* = 8.5 Hz, 2H). **<sup>13</sup>C NMR (100 MHz, *d*<sub>6</sub>-DMSO):** 165.0, 156.7, 141.2, 132.6 (q, *J* = 31.9 Hz), 130.8, 128.6, 124.4, 123.6 (q, *J* = 272.8 Hz), 122.4, 121.6, 115.5 (q, *J* = 4.0 Hz), 113.3 (q, *J* = 4.2 Hz). **UV**(λ<sub>max</sub> nm): 270; **IR**<sub>vmax</sub> (cm<sup>-1</sup>): 3161, 1642, 1112, 661; **HRMS (ESI):** calcd for C<sub>14</sub>H<sub>9</sub>Br<sub>2</sub>F<sub>3</sub>NO<sub>2</sub>[M+H]<sup>+</sup>: 437.8947, found: 437.8919.

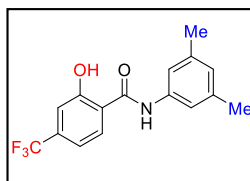

***N*-(3,5-dimethylphenyl)-2-hydroxy-4-(trifluoromethyl)benzamide (57):**

The title compound was synthesized following the general procedure for synthesis of *N*-aryl-2-hydroxybenzamides to afford **57** as a white solid (25 mg, 14%). **<sup>1</sup>H NMR (400 MHz, *d*<sub>6</sub>-DMSO):** 11.91 (s, 1H), 10.32 (s, 1H), 8.02 (d, *J* = 8.0 Hz, 1H), 7.34 (s, 2H), 7.29 (d, *J* = 9.3 Hz, 2H), 6.79 (s, 1H), 2.27 (s, 6H). **<sup>13</sup>C NMR (100 MHz, *d*<sub>6</sub>-DMSO):** 164.6, 157.4, 138.1, 137.9, 132.6 (q, *J* = 32.0 Hz), 130.7, 125.9, 123.6 (q, *J* = 272.8 Hz), 123.4, 118.3, 115.4 (q, *J* = 3.6 Hz), 113.6 (q, *J* = 3.8 Hz), 21.1. **UV**(λ<sub>max</sub> nm): 302; **IR**<sub>vmax</sub> (cm<sup>-1</sup>): 2588, 1620, 1119, 681; **HRMS (ESI):** calcd for C<sub>16</sub>H<sub>15</sub>F<sub>3</sub>NO<sub>2</sub> [M+H]<sup>+</sup>: 310.1049, found: 310.1046

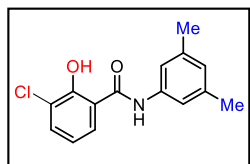

**3-chloro-*N*-(3,5-dimethylphenyl)-2-hydroxybenzamide(58):**

The title compound was synthesized following the general procedure for synthesis of *N*-aryl-2-hydroxybenzamides to afford **58** as a white solid (45 mg, 27%). **<sup>1</sup>H NMR (400 MHz, *d*<sub>6</sub>-DMSO):** 12.9 (s, 1H), 10.5 (s, 1H), 8.0 (dd, *J* = 8.1, 1.5 Hz, 1H), 7.7 (dd, *J* = 7.9, 1.4 Hz, 1H), 7.3 (s, 2H), 7.0 (t, *J* = 8.0 Hz, 1H), 6.8 (s, 1H), 2.3 (s, 6H). **<sup>13</sup>C NMR (100 MHz, *d*<sub>6</sub>-DMSO):** 167.8, 156.2, 137.8, 137.2, 134.0, 126.8, 126.4, 121.3, 119.6, 119.1, 117.2, 21.0. **UV**(λ<sub>max</sub> nm): 271; **IR**<sub>vmax</sub> (cm<sup>-1</sup>): 3380, 1614, 1549, 1117; **HRMS (ESI):** calcd for C<sub>15</sub>H<sub>15</sub>ClNO<sub>2</sub> [M+H]<sup>+</sup>: 276.0786, found: 276.0767.

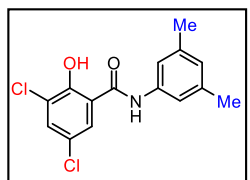

**3,5-dichloro-*N*-(3,5-dimethylphenyl)-2-hydroxybenzamide (59):**

The title compound was synthesized following the general procedure for synthesis of *N*-aryl-2-hydroxybenzamides to afford **59** as a white solid (65 mg, 44%). **<sup>1</sup>H NMR (400 MHz, *d*<sub>6</sub>-DMSO):** 12.9 (s, 1H), 10.7 (s, 1H), 8.1 (t, *J* = 2.9, 1.5 Hz, 1H), 7.8 (d, *J* = 2.6 Hz, 1H), 7.3 (s, 2H), 6.8 (s, 1H), 2.3 (s, 6H). **<sup>13</sup>C**

**NMR (100 MHz, *d*<sub>6</sub>-DMSO):** 166.4, 155.5, 137.8, 137.2, 133.0, 126.4, 122.7, 121.8, 119.3, 118.3, 118.2, 21.0. **UV**( $\lambda_{\text{max}}$  nm): 265; **IR** $\nu_{\text{max}}$  (cm<sup>-1</sup>): 3234, 1632, 1572, 1168. **HRMS (ESI):** calcd for C<sub>15</sub>H<sub>14</sub>Cl<sub>2</sub>NO<sub>2</sub> [M+H]<sup>+</sup>: 310.0396, found: 310.0385.

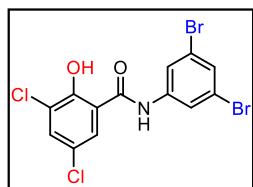

**3,5-dichloro-N-(3,5-dibromophenyl)-2-hydroxybenzamide (60):** The title compound was synthesized following the general procedure for synthesis of N-aryl-2-hydroxybenzamides to afford **60** as a white solid (25 mg, 19%). **<sup>1</sup>H NMR (400 MHz, *d*<sub>6</sub>-DMSO):** 14.75 (s, 1H), 7.92 (d, *J* = 1.7 Hz, 2H), 7.64 (d, *J* = 3.0 Hz, 1H), 7.44 (t, *J* = 1.7 Hz, 1H), 7.34 (d, *J* = 3.0 Hz, 1H). **<sup>13</sup>C NMR (100 MHz, *d*<sub>6</sub>-DMSO):** 166.3, 163.9, 143.0, 131.7, 127.5, 127.4, 126.1, 122.9, 121.3, 119.3, 113.3. **UV**( $\lambda_{\text{max}}$  nm): 278; **IR** $\nu_{\text{max}}$  (cm<sup>-1</sup>): 3293, 1640, 1579, 145; **HRMS (ESI):** calcd for C<sub>13</sub>H<sub>8</sub>Br<sub>2</sub>Cl<sub>2</sub>NO<sub>2</sub> [M+H]<sup>+</sup>: 437.8293, found: 437.8261.

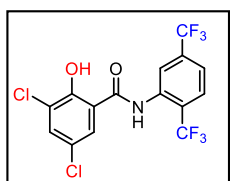

**N-(2,5-bis(trifluoromethyl)phenyl)-3,5-dichloro-2-hydroxybenzamide (61):** The title compound was synthesized following the general procedure for synthesis of N-aryl-2-hydroxybenzamides to afford **61** as a white solid (21 mg, 12%). **<sup>1</sup>H NMR (400 MHz, *d*<sub>3</sub>-Acetonitrile):** 9.0 (s, 1H), 7.8 (d, *J* = 8.3 Hz, 1H), 7.7 (d, *J* = 3.0 Hz, 1H), 7.5 – 7.4 (m, 1H), 7.3 (d, *J* = 3.0 Hz, 1H). **<sup>13</sup>C NMR (100 MHz, *d*<sub>3</sub>-Acetonitrile):** 167.6, 166.4, 140.3, 134.5, 134.2, 132.3, 128.7, 128.0 (q, *J* = 5.8 Hz), 127.2, 124.8 (q, *J* = 271.9 Hz), 124.6 (q, *J* = 271.9 Hz), 121.8 (q, *J* = 4.1 Hz), 119.9, 119.4 (q, *J* = 3.8 Hz), 113.3. **UV**( $\lambda_{\text{max}}$  nm): 273; **IR** $\nu_{\text{max}}$  (cm<sup>-1</sup>): 3291, 1640, 1542, 1120; **HRMS (ESI):** calcd for C<sub>15</sub>H<sub>7</sub>Cl<sub>2</sub>F<sub>6</sub>NO<sub>2</sub>Na [M+Na]<sup>+</sup>: 439.9650, found: 439.9659.

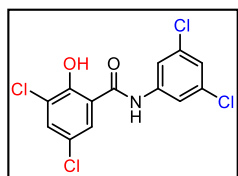

**3,5-dichloro-N-(3,5-dichlorophenyl)-2-hydroxybenzamide (62):** The title compound was synthesized following the general procedure for synthesis of N-aryl-2-hydroxybenzamides to afford **62** as a white solid (35 mg, 18%). **<sup>1</sup>H NMR (400 MHz, *d*<sub>4</sub>-CD<sub>3</sub>OD):** 7.76 (d, *J* = 3.0 Hz, 1H), 7.74 (t, *J* = 2.2 Hz, 2H), 7.32 (d, *J* = 2.9 Hz, 1H), 7.10 (t, *J* = 1.8 Hz, 1H). **<sup>13</sup>C NMR (100 MHz, *d*<sub>4</sub>-CD<sub>3</sub>OD):** 166.5, 163.6, 141.4, 134.8, 131.7, 131.5, 127.3, 126.9, 122.4, 118.0, 115.7. **UV**( $\lambda_{\text{max}}$  nm): 267; **IR** $\nu_{\text{max}}$  (cm<sup>-1</sup>): 3293, 1638, 1544, 1110; **HRMS (ESI):** calcd for C<sub>13</sub>H<sub>8</sub>Cl<sub>4</sub>NO<sub>2</sub> [M+H]<sup>+</sup>: 349.9304, found: 349.9283.

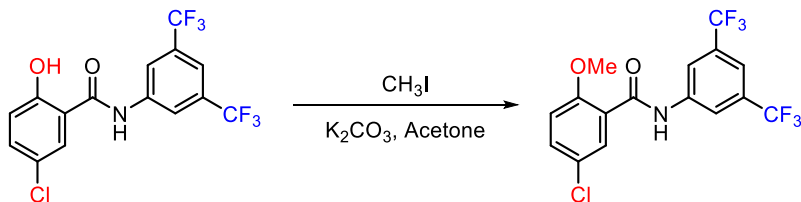

**N-(3,5-bis(trifluoromethyl)phenyl)-5-chloro-2-methoxybenzamide (2):** Potassium carbonate (27 mg, 0.20 mmol) was added to a stirring solution of **IMD 0354** (50 mg, 0.13 mmol) in 20 mL acetone. To the resulting mixture, iodomethane (28 mg, 0.20 mmol) was added at room temperature and stirred for 16 hours. The reaction contents were transferred to a separatory funnel containing saturated sodium chloride and extracted with ethyl acetate. The organic contents were combined, dried with sodium sulfate, and then purified via column using 1:3 to 1:1 DCM/Hexanes

to obtain a white solid (37 mg, 74%). **<sup>1</sup>H NMR (400 MHz, CDCl<sub>3</sub>):** 10.0 (s, 1H), 8.2 (d, *J* = 2.8 Hz, 1H), 8.1 (s, 2H), 7.6 (s, 1H), 7.5 (dd, *J* = 8.9, 2.8 Hz, 1H), 7.0 (d, *J* = 8.8 Hz, 1H), 4.1 (s, 3H). **<sup>13</sup>C NMR (100 MHz, CDCl<sub>3</sub>):** 162.3, 155.7, 139.4, 133.6, 132.3 (q, *J* = 33.4 Hz), 132.3, 127.5, 123.1 (q, *J* = 272.8 Hz), 122.0, 120.1 (d, *J* = 4.2 Hz), 117.6 (p, *J* = 3.9 Hz), 113.2, 56.9. **UV**(λ<sub>max</sub> nm): 281; **IR**v<sub>max</sub> (cm<sup>-1</sup>): 3314, 1665, 1470, 911; **HRMS (ESI):** calcd for C<sub>16</sub>H<sub>11</sub>ClF<sub>6</sub>NO<sub>2</sub> [M+H]<sup>+</sup>: 398.0377, found: 398.0361

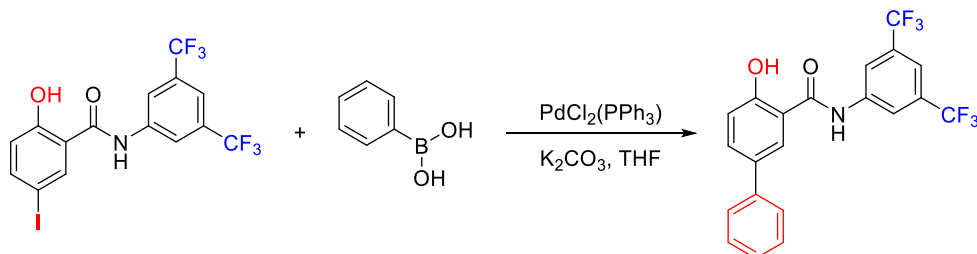

***N*-(3,5-bis(trifluoromethyl)phenyl)-4-hydroxy-[1,1'-biphenyl]-3-carboxamide (13):** To a flame dried round bottom flask compound **10** (300mg, 0.63 mmol), PdCl<sub>2</sub>(PPh<sub>3</sub>) (22 mg, 0.03 mmol), K<sub>2</sub>CO<sub>3</sub> (87 mg, 0.63 mmol), and phenyl boronic acid (154 mg, 1.26 mmol) were added. The flask was evacuated then placed under argon then dissolved in 20 mL of THF. Argon was subsequently bubbled through the solvent for 30 minutes then the reaction was heated to reflux and allowed to stir until for 48 hours. The reaction was cooled and checked for completion, ethyl acetate (100 mL) was added, taken in a separatory funnel and washed with Sodium bicarbonate (3x30 mL) followed by water (3x30 mL) and then brine (2x30 mL). The organic layer was then dried using anhydrous sodium sulfate, evaporated and purified via preparative scale TLC using 1:1 ethyl ether/Hexanes to obtain a white solid. **<sup>1</sup>H NMR (400 MHz, *d*<sub>6</sub>-DMSO):** 11.42 (s, 1H), 11.08 (s, 1H), 8.49 (s, 2H), 8.16 (d, *J* = 2.4 Hz, 1H), 7.86 (s, 1H), 7.78 (dd, *J* = 8.5, 2.4 Hz, 1H), 7.68 (d, *J* = 7.6 Hz, 2H), 7.48 (t, *J* = 7.6 Hz, 2H), 7.35 (t, *J* = 7.4 Hz, 1H), 7.10 (d, *J* = 8.5 Hz, 1H). **<sup>13</sup>C NMR (100 MHz, *d*<sub>6</sub>-DMSO):** 167.3, 159.6, 140.8, 139.5, 132.0, 130.7 (q, *J* = 32.9 Hz), 130.0, 128.9, 127.2, 126.8, 126.1, 123.3 (q, *J* = 272.8 Hz), 120.3, 118.5, 118.2, 116.4. **UV**(λ<sub>max</sub> nm): 204; **IR**v<sub>max</sub> (cm<sup>-1</sup>): 3252, 2926, 1642, 1128; **HRMS (ESI):** calcd for C<sub>21</sub>H<sub>14</sub>F<sub>6</sub>NO<sub>2</sub> [M+H]<sup>+</sup>: 426.0923, found: 426.0906.

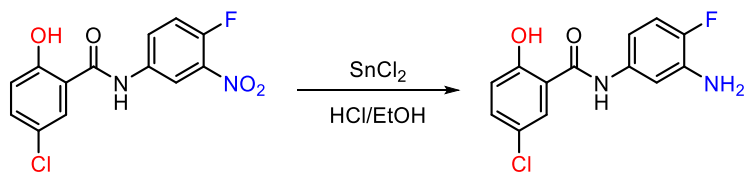

***N*-(3-amino-4-fluorophenyl)-5-chloro-2-hydroxybenzamide (36):** To the solution of 5-chloro-*N*-(4-fluoro-3-nitrophenyl)-2-hydroxybenzamide **35** (1 eq) in anhydrous ethanol (0.1 M), Tin (II) chloride (2 eq) was added. The reaction mixture was heated to 70 °C for 12 h, cooled, and concentrated under reduced pressure. The residue was taken in a mixture of 100 mL Ethyl acetate and 100 mL saturated sodium bicarbonate solution and the water layer was discarded. The organic layer was washed with brine, dried over anhydrous sodium sulfate, filtered, and concentrated under reduced pressure, and then purified via column using 10:1 DCM/methanol to obtain compound **36** as a white solid (112 mg, 71%). **<sup>1</sup>H NMR (400 MHz, *d*<sub>6</sub>-DMSO):** 11.94 (s, 1H), 10.22 (s, 1H), 7.95 (d, *J* = 2.7 Hz, 1H), 7.45 (dd, *J* = 8.8, 2.7 Hz, 1H), 7.20 (dd, *J* = 8.4, 2.6 Hz, 1H), 7.00 (d, *J* =

9.0 Hz, 1H), 6.97 – 6.91 (m, 1H), 6.77 (ddd,  $J = 8.7, 4.1, 2.6$  Hz, 1H), 5.24 (s, 2H).  **$^{13}\text{C}$  NMR (100 MHz,  $d_6$ -DMSO):** 165.2, 157.5, 148.0 (d,  $J = 234.7$  Hz), 136.9 (d,  $J = 13.7$  Hz), 134.8 (d,  $J = 2.3$  Hz), 133.4, 128.7, 123.1, 119.9, 119.6, 115.1 (d,  $J = 19.3$  Hz), 109.3 (d,  $J = 4.4$  Hz), 108.9 (d,  $J = 6.5$  Hz). **UV**( $\lambda_{\text{max}}$  nm): 274; **IR** $\nu_{\text{max}}$  ( $\text{cm}^{-1}$ ): 3351, 1651, 1128, 933; **HRMS (ESI):** calcd for  $\text{C}_{21}\text{H}_{14}\text{F}_6\text{NO}_2$   $[\text{M}+\text{H}]^+$ : 281.04876, found: 281.0488.

## References

- (1) Li, Y.-R.; Lin, C.-C.; Huang, C.-Y.; Wong, Y.-H.; Hsieh, C.-H.; Wu, H.-W.; Chen, J. J. W.; Wu, Y.-S. Study of the Inhibitory Effects on TNF- $\alpha$ -Induced NF-KB Activation of IMD0354 Analogs. *Chem. Biol. Drug Des.* **2017**, *90*, 1307–1311.
- (2) Lee, I.-Y.; Gruber, T. D.; Samuels, A.; Yun, M.; Nam, B.; Kang, M.; Crowley, K.; Winterroth, B.; Boshoff, H. I.; Barry, C. E. Structure–activity Relationships of Antitubercular Salicylanilides Consistent with Disruption of the Proton Gradient via Proton Shuttling. *Bioorg. Med. Chem.* **2013**, *21*, 114–126.
- (3) Mook, R. A.; Wang, J.; Ren, X.-R.; Chen, M.; Spasojevic, I.; Barak, L. S.; Lysterly, H. K.; Chen, W. Structure–activity Studies of Wnt/ $\beta$ -Catenin Inhibition in the Niclosamide Chemotype: Identification of Derivatives with Improved Drug Exposure. *Bioorg. Med. Chem.* **2015**, *23*, 5829–5838.
- (4) Paraskevopoulos, G.; Monteiro, S.; Vosátka, R.; Krátký, M.; Navrátilová, L.; Trejtnar, F.; Stolaříková, J.; Vinšová, J. Novel Salicylanilides from 4,5-Dihalogenated Salicylic Acids: Synthesis, Antimicrobial Activity and Cytotoxicity. *Bioorg. Med. Chem.* **2017**, *25*, 1524–1532.

Compound 2

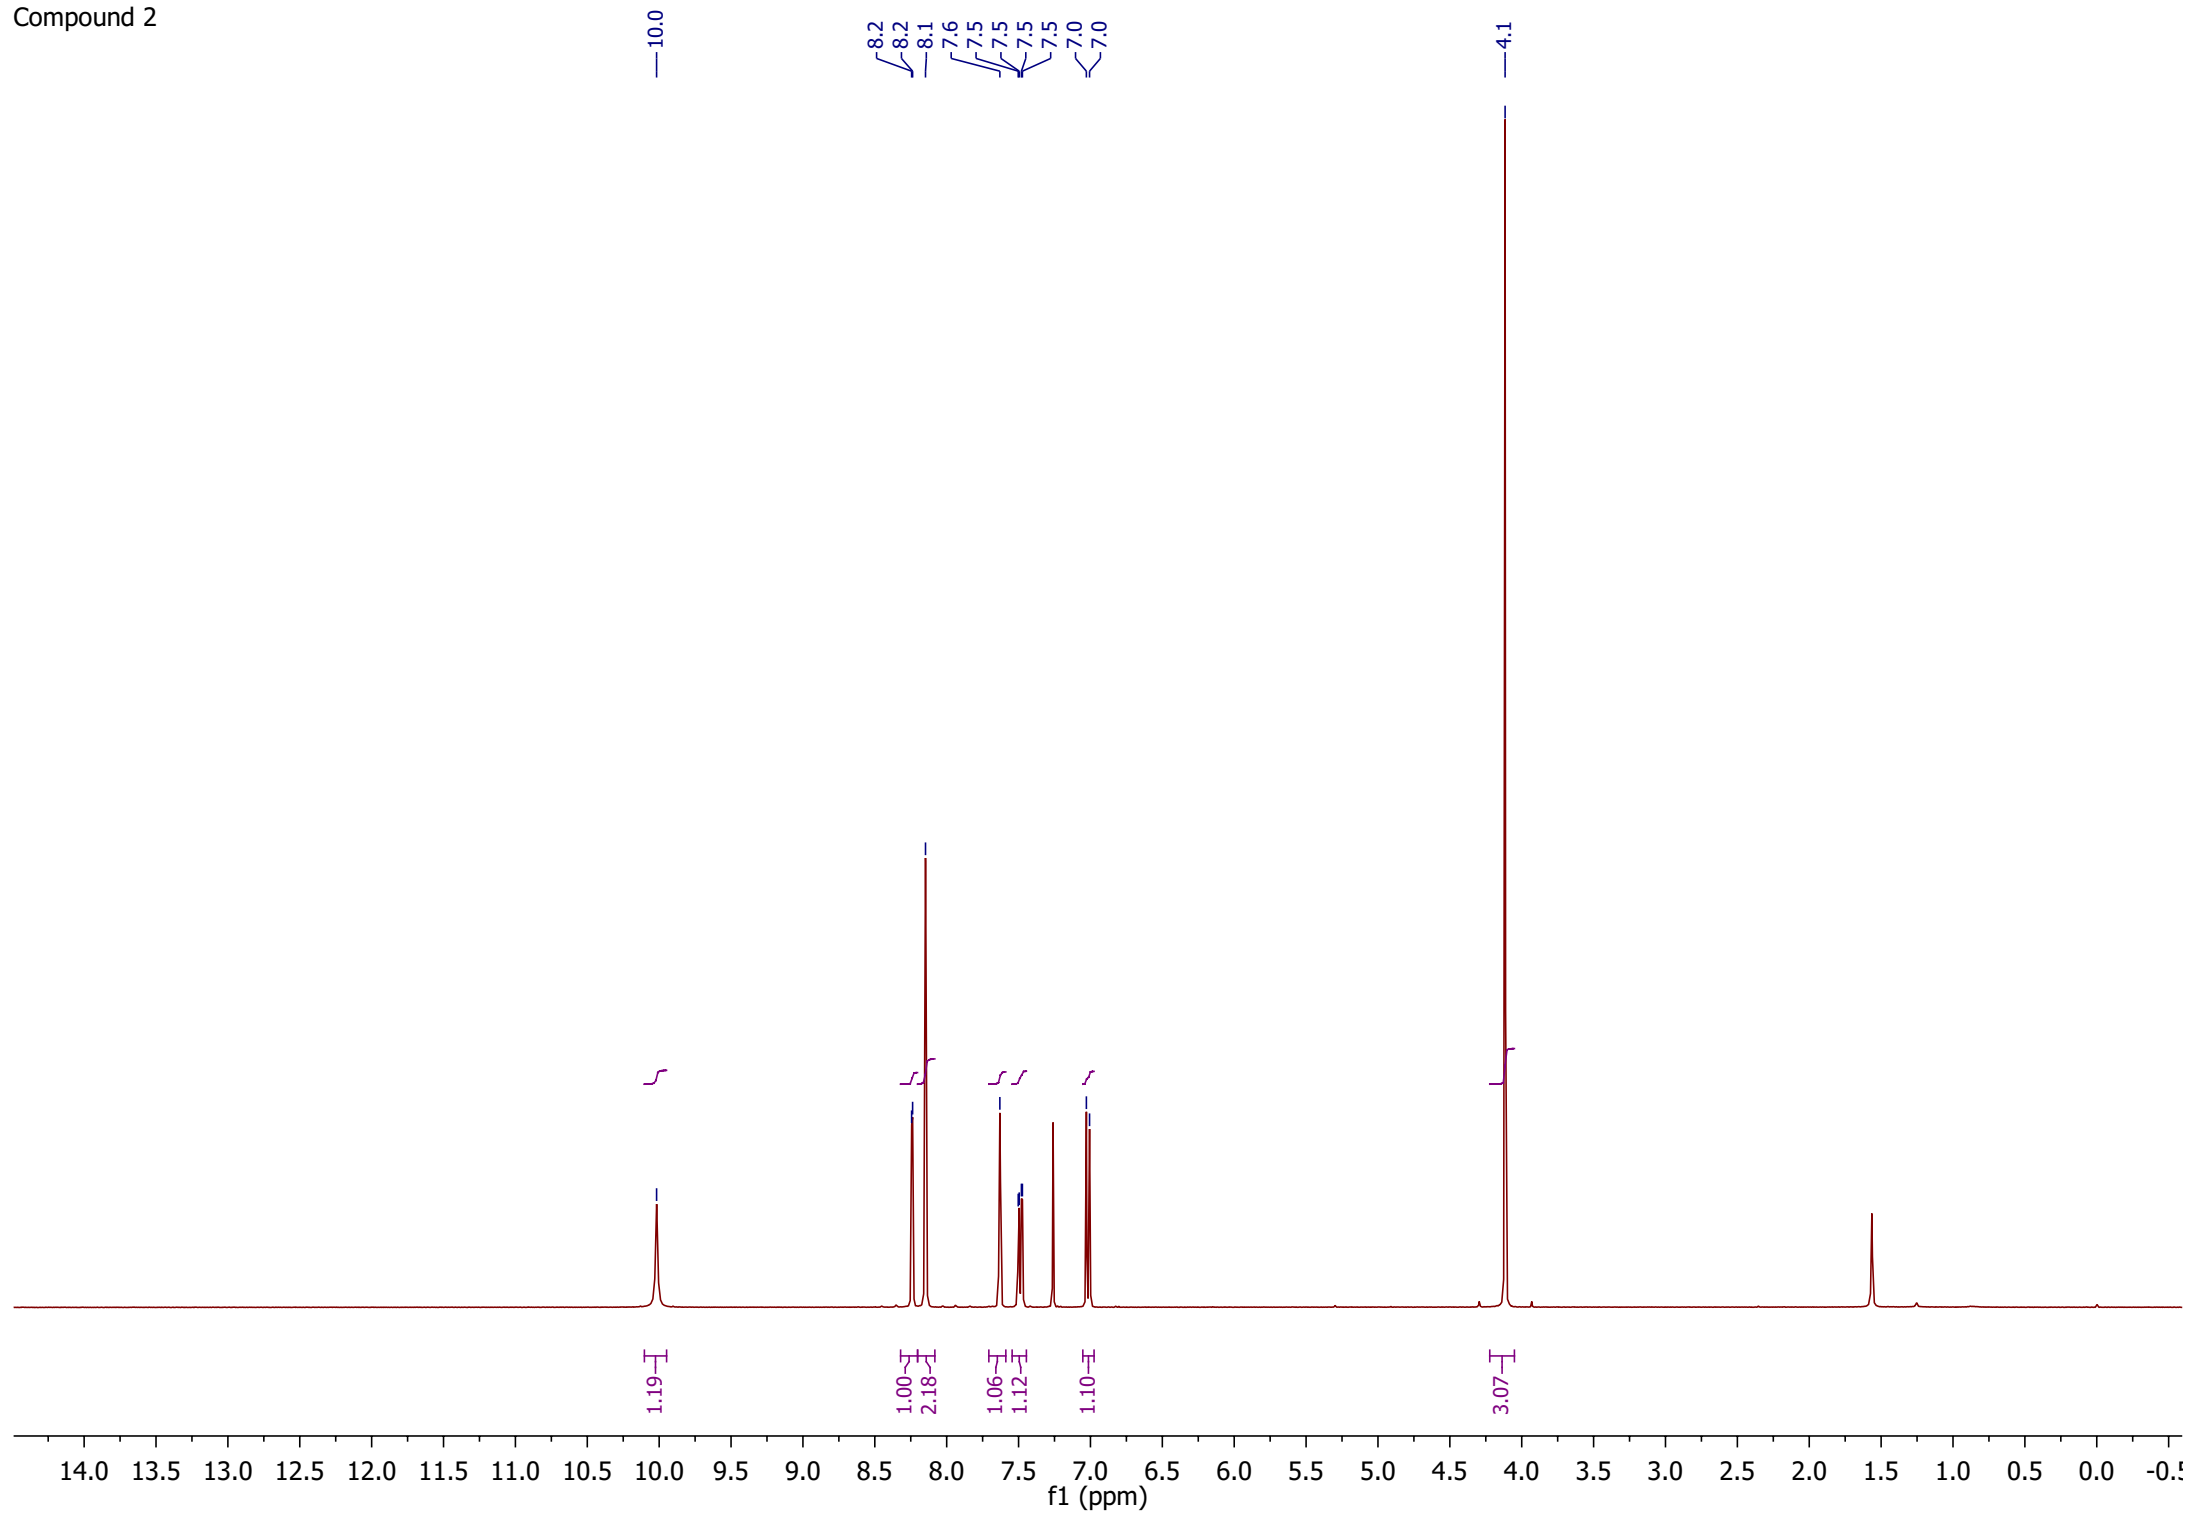

Compound 2

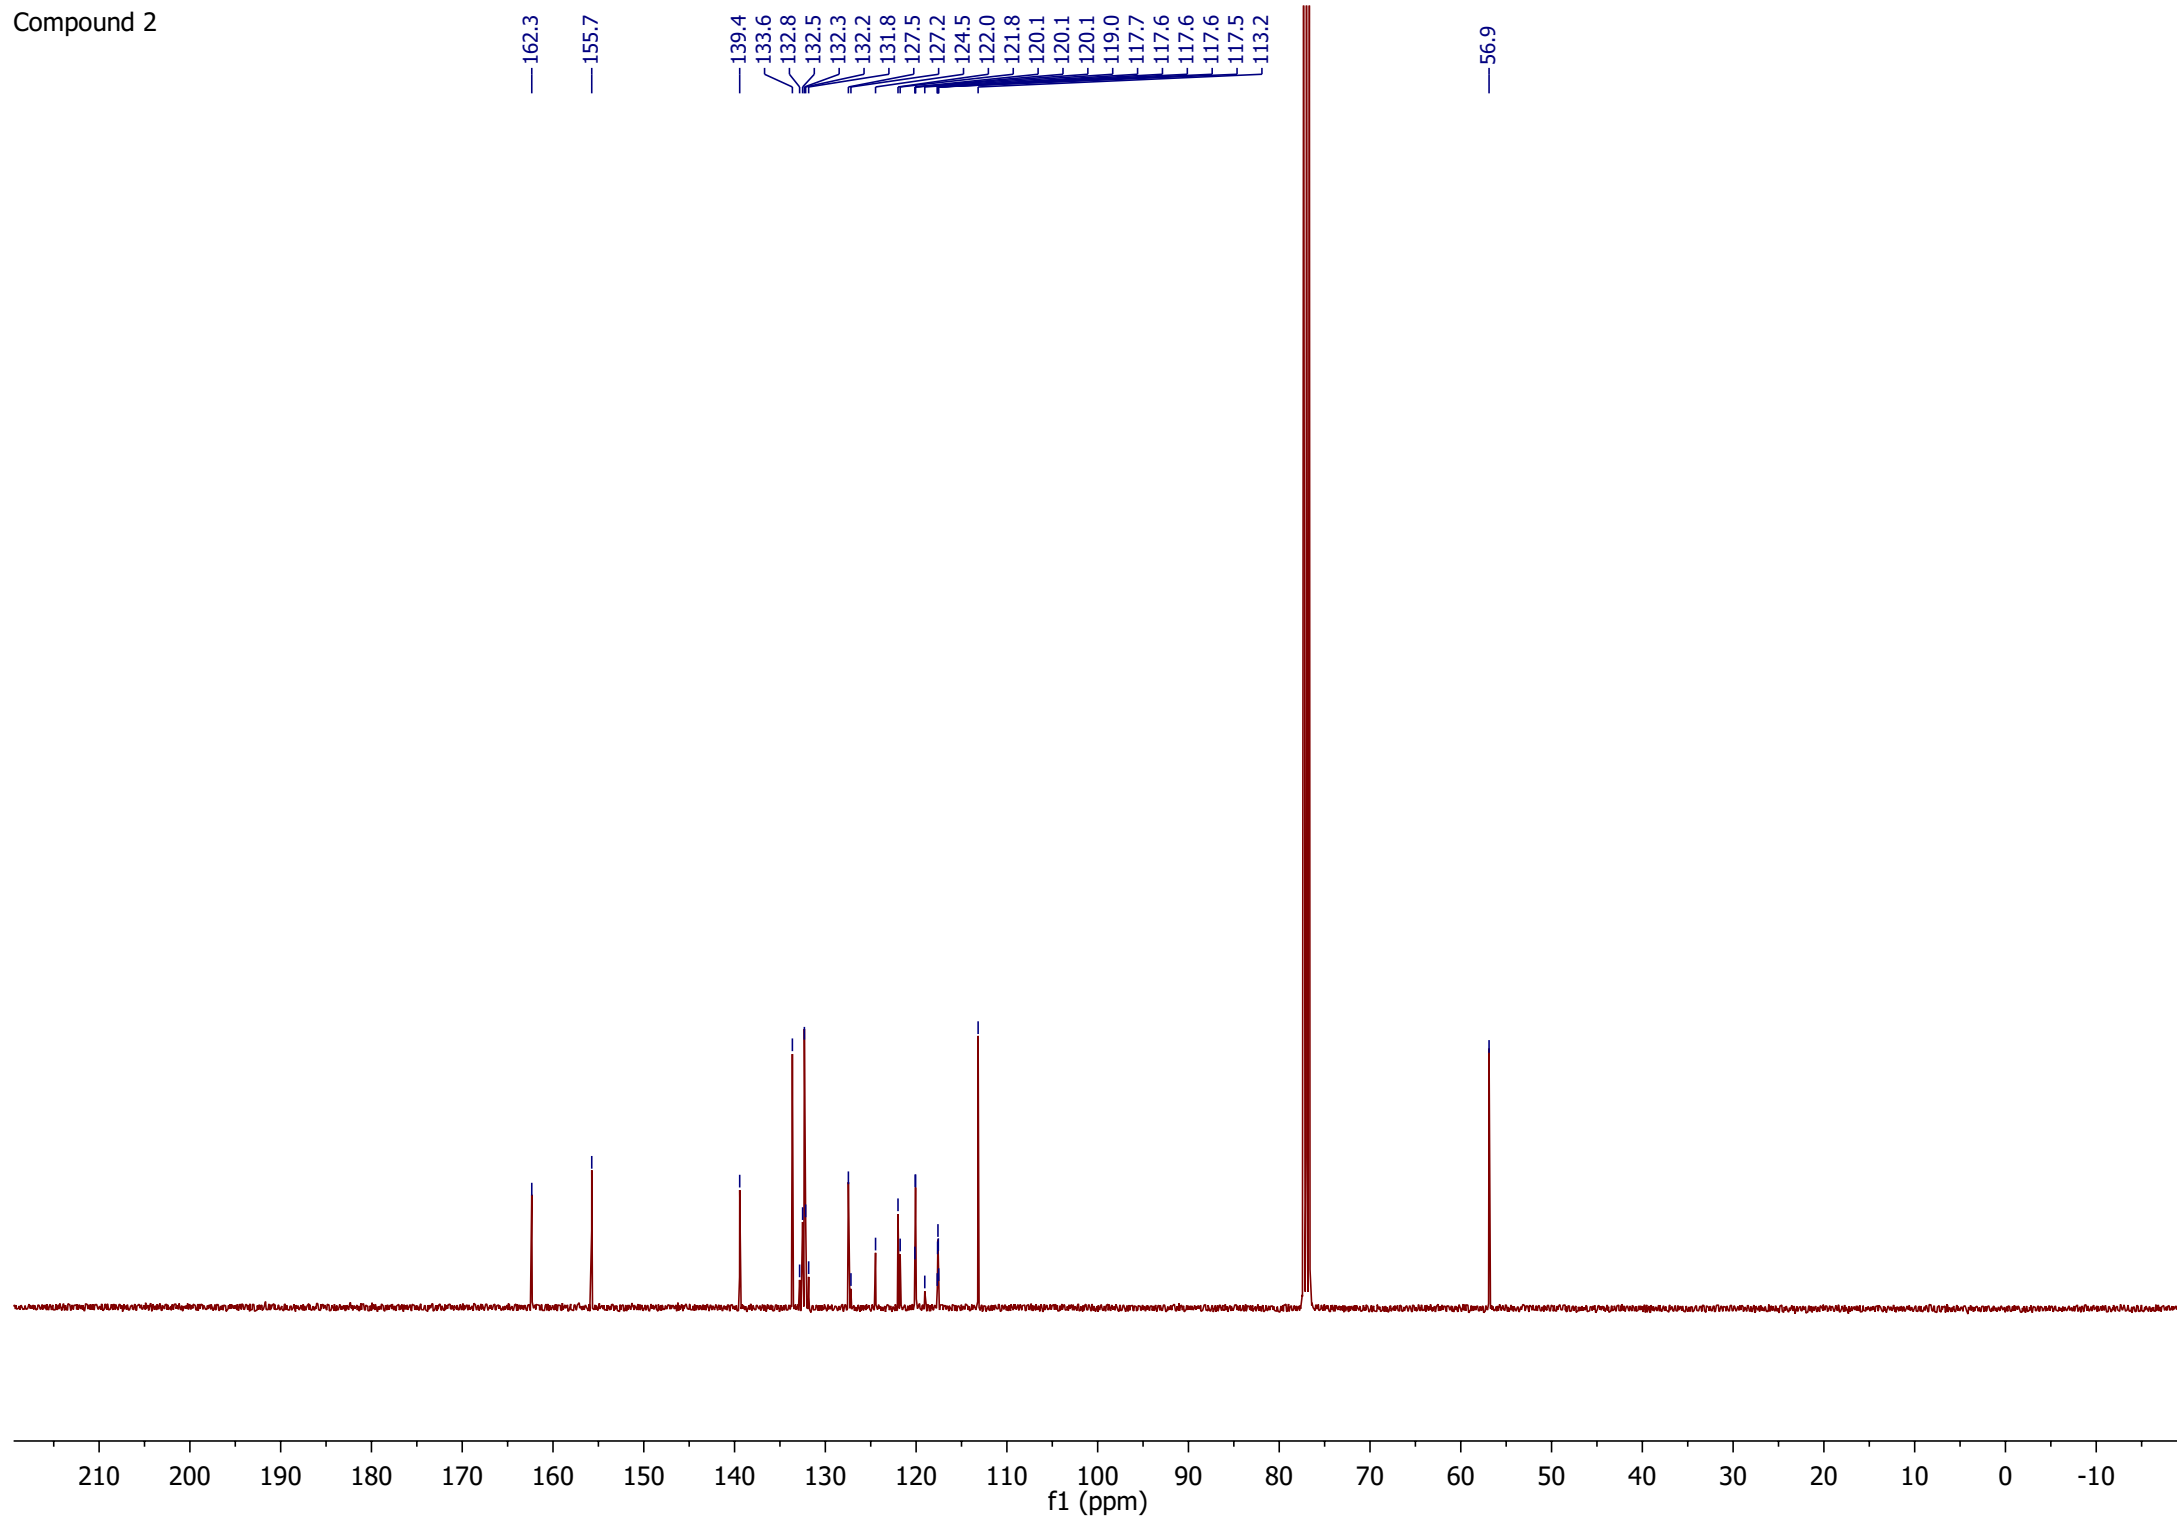

Compound 3

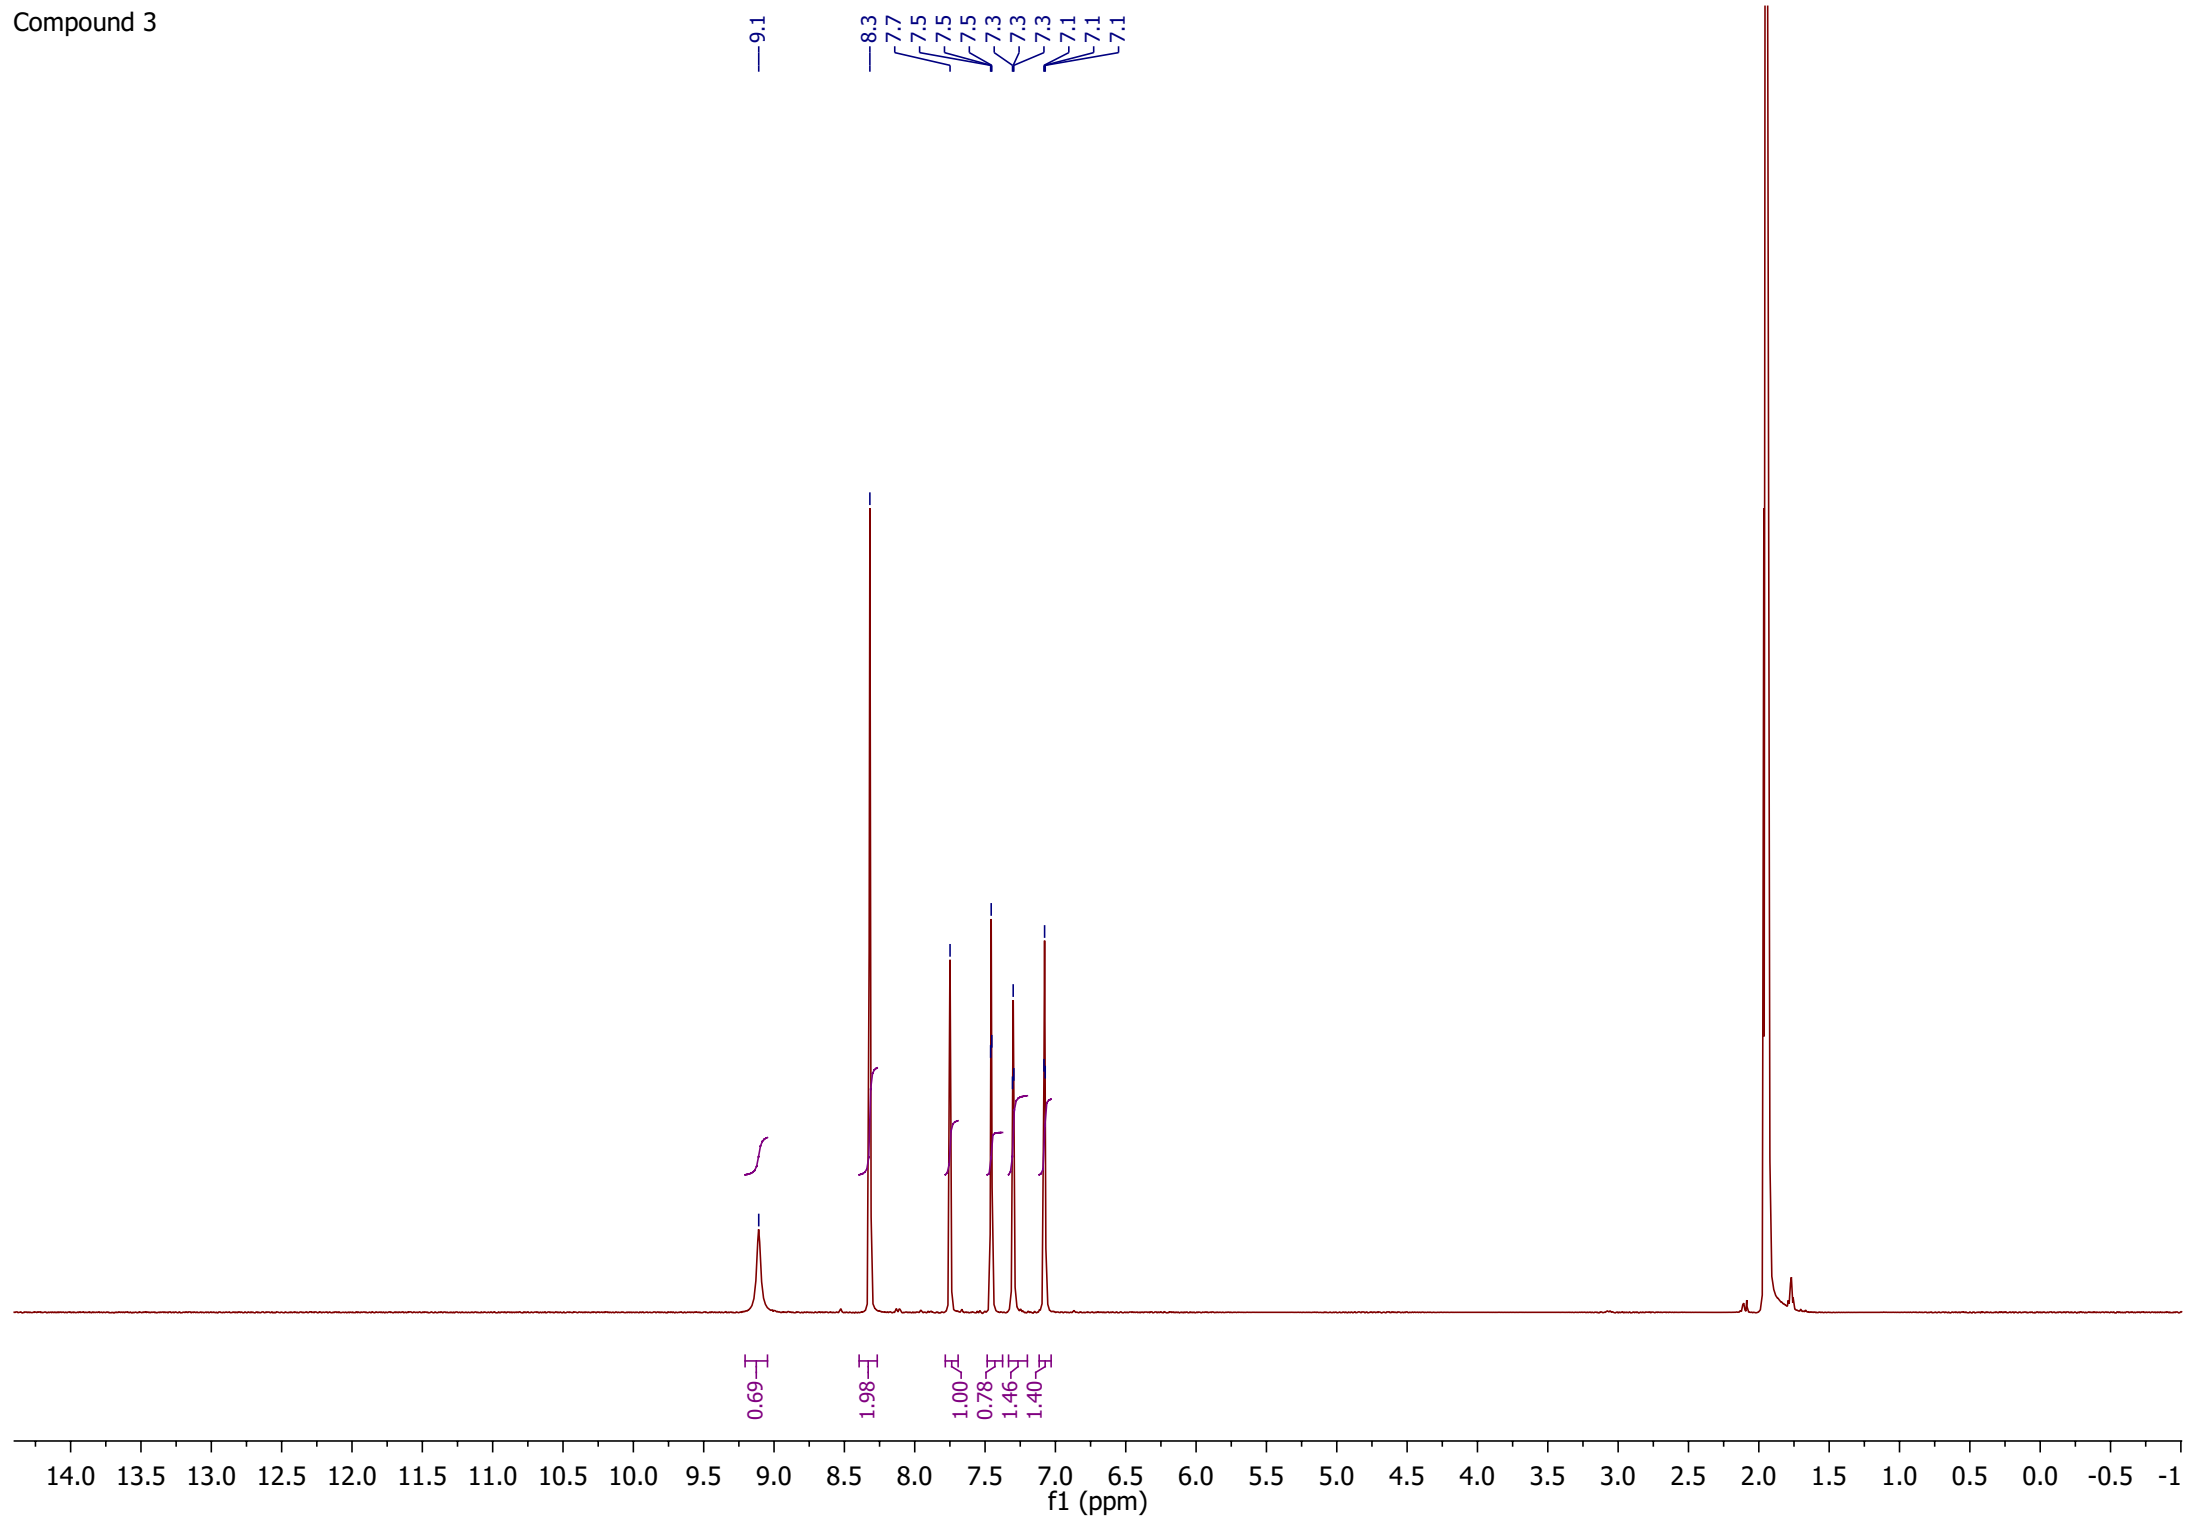



Compound 3

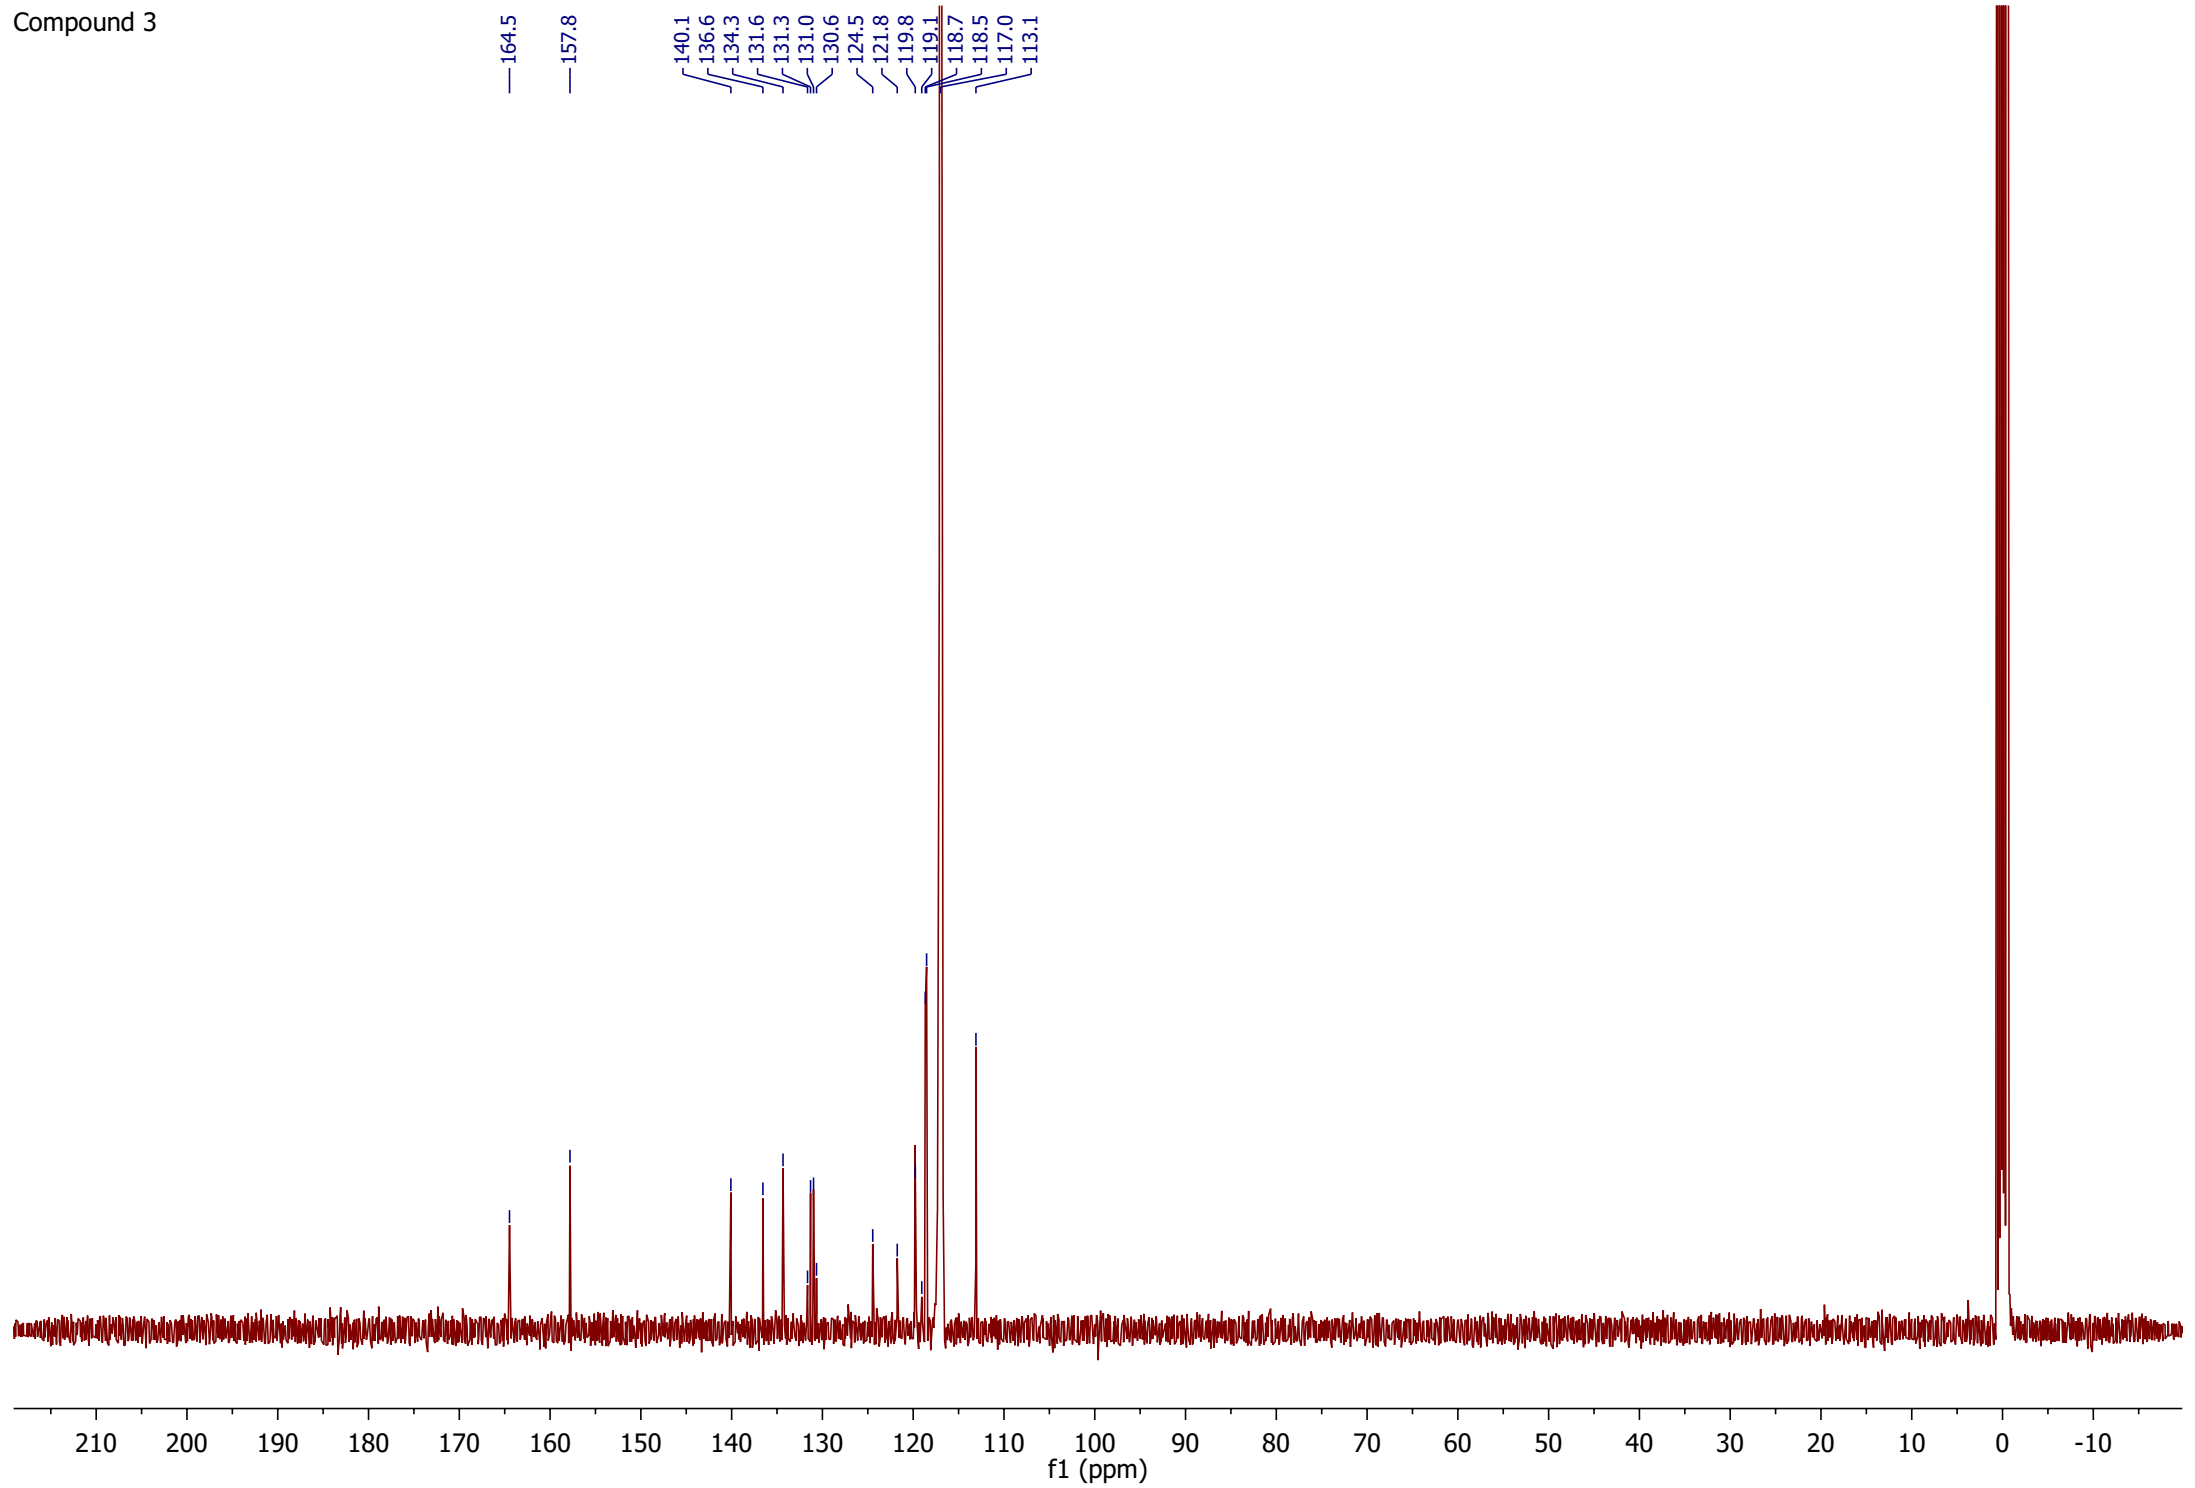

Compound 4

— 11.11

— 10.66

8.50  
8.50  
8.11  
8.10  
8.09  
8.07  
7.86  
7.85  
7.84  
7.83  
7.80  
7.12  
7.10

1.00

0.97

2.18

1.01

1.04

1.02

0.99

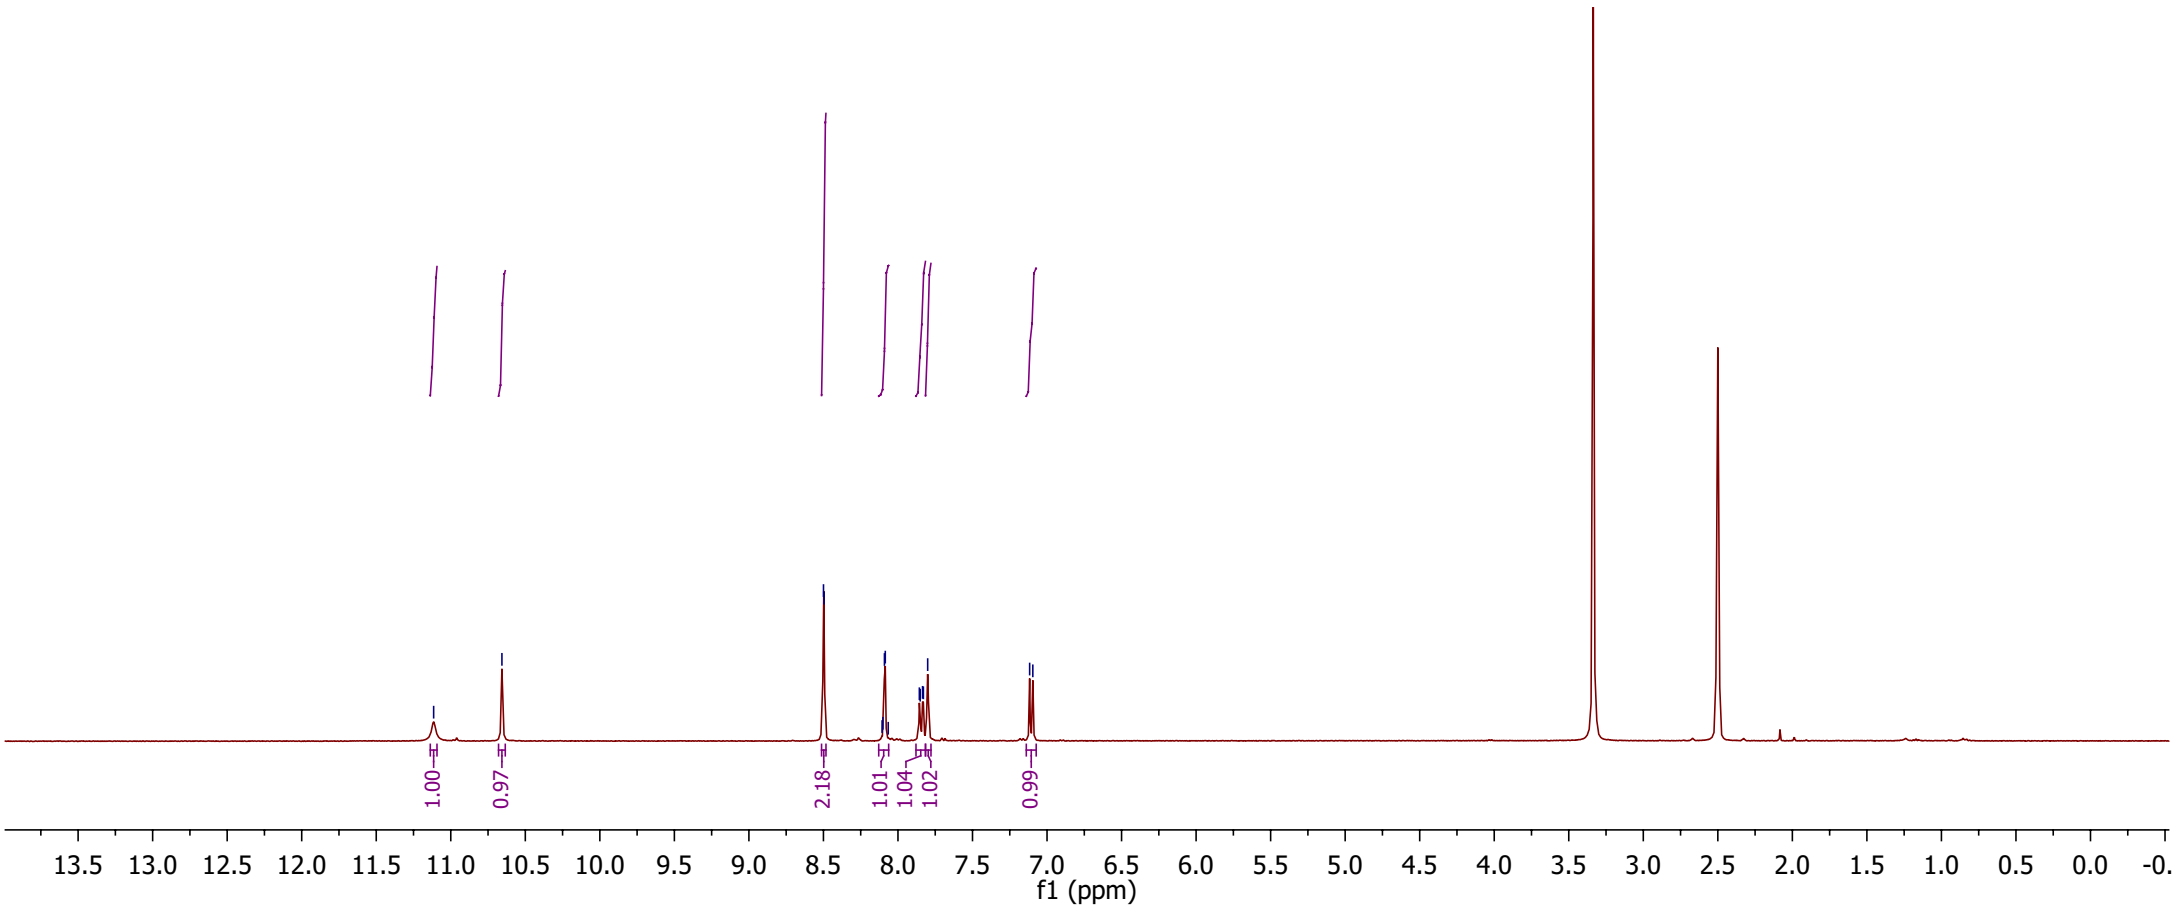

Compound 4

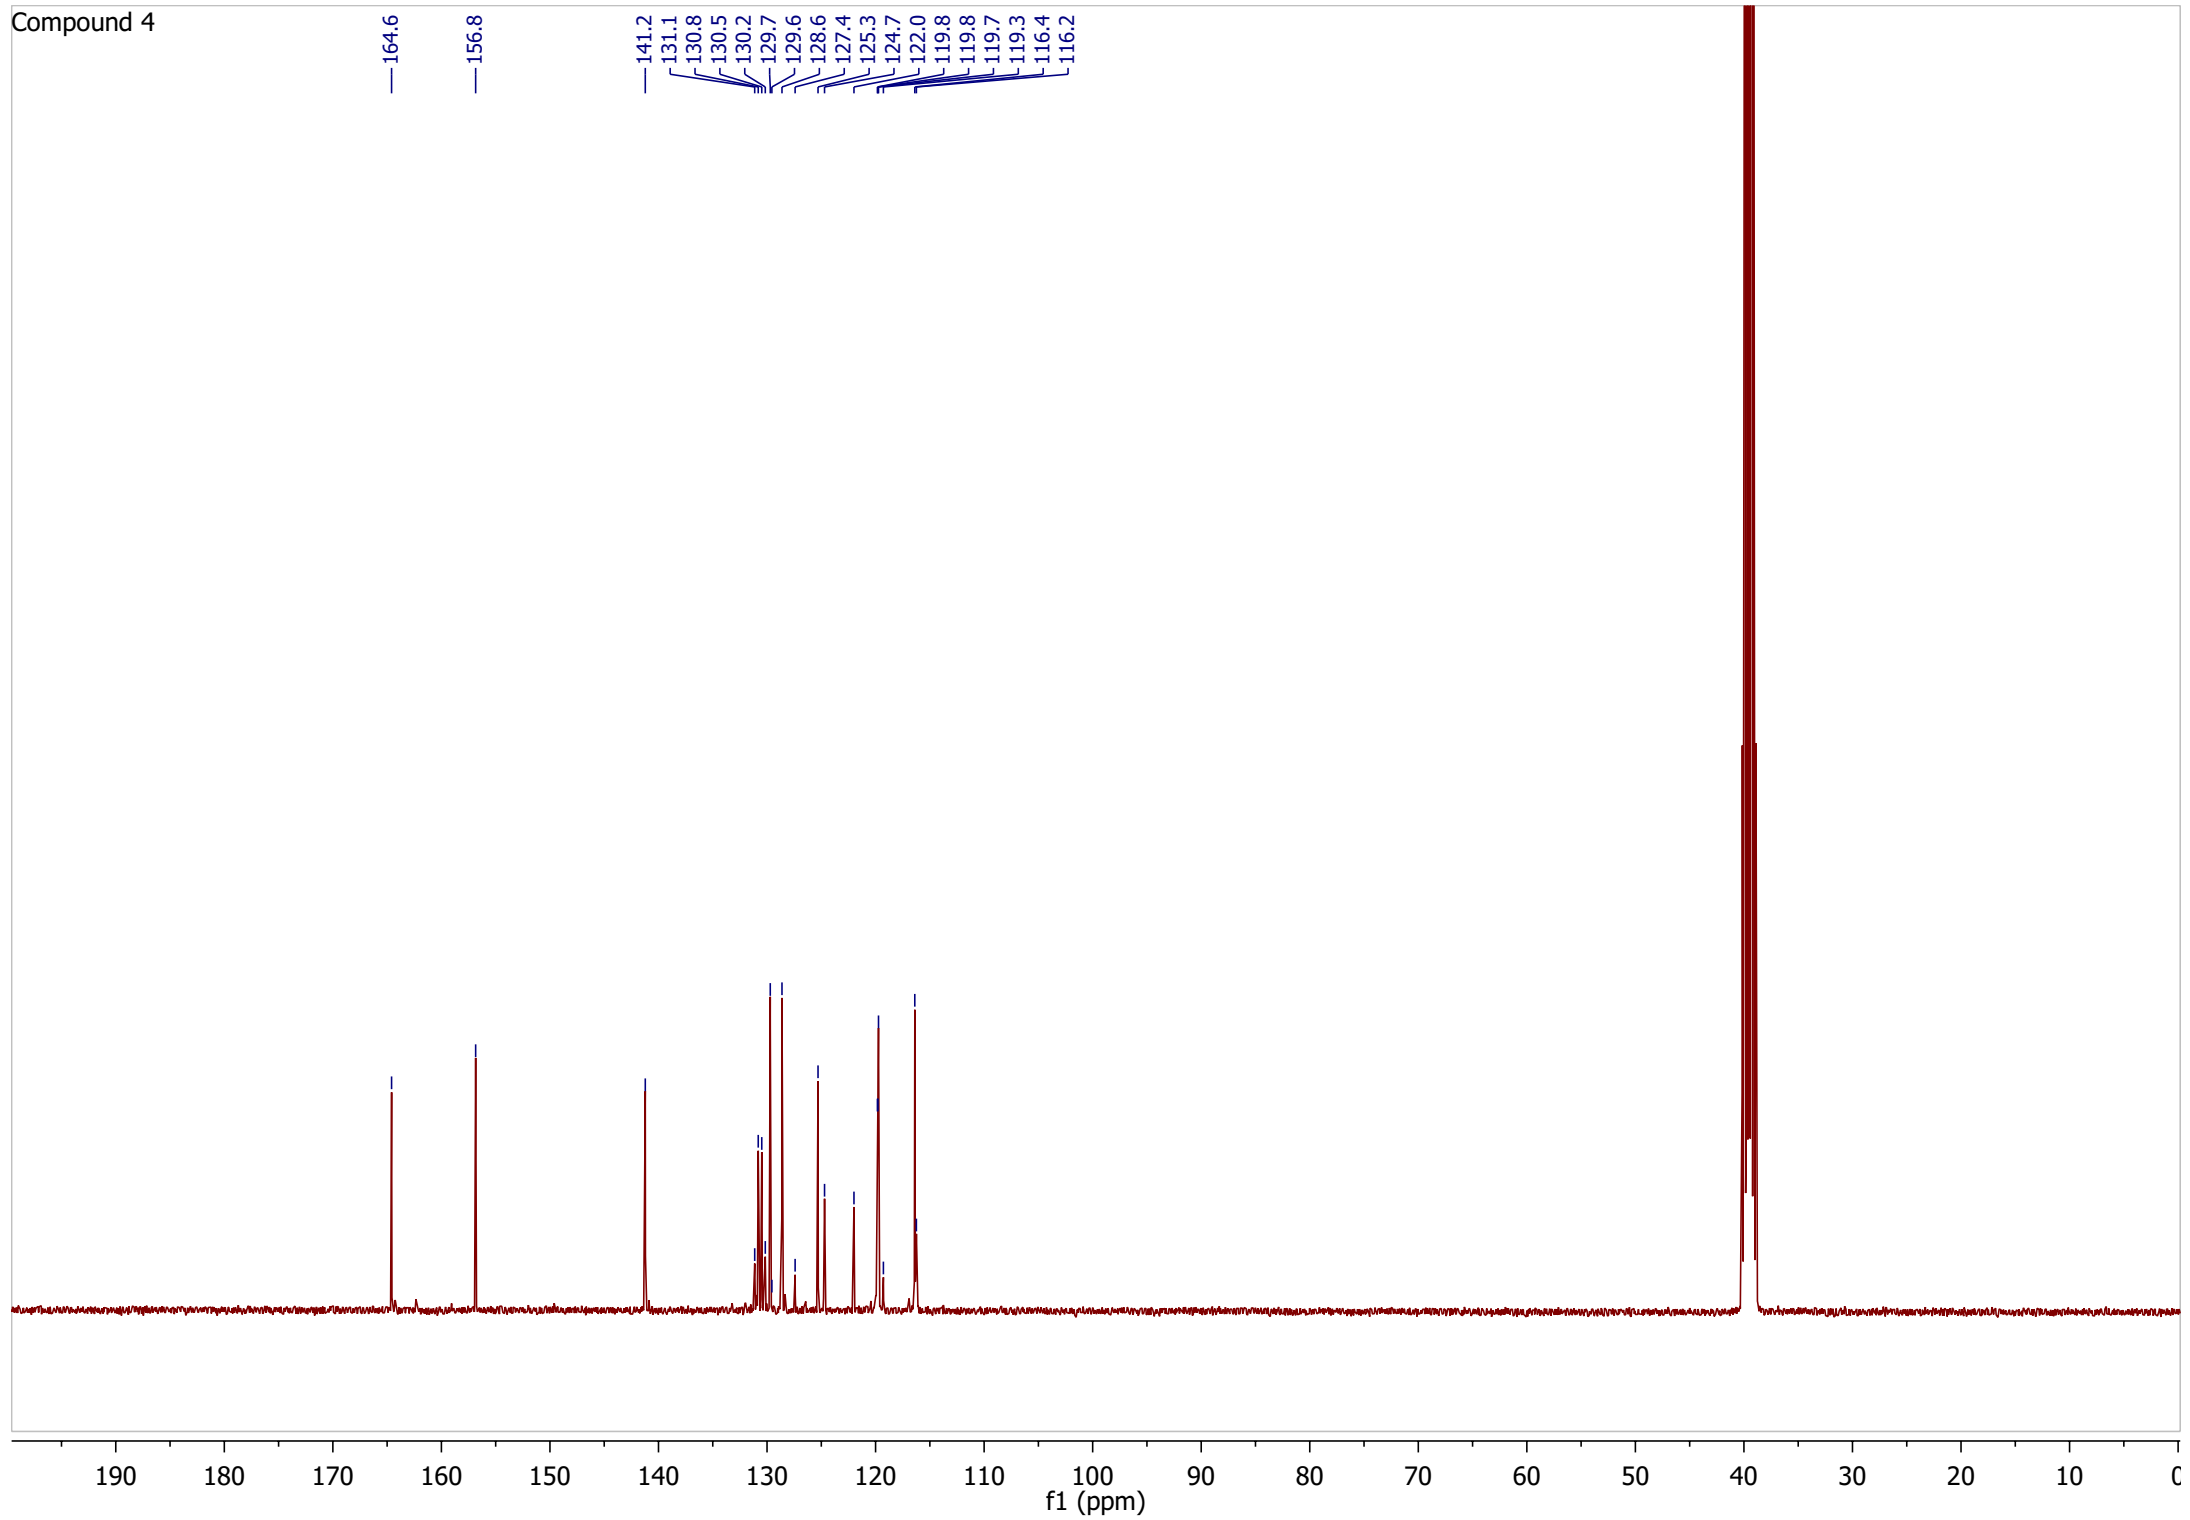

Compound 5

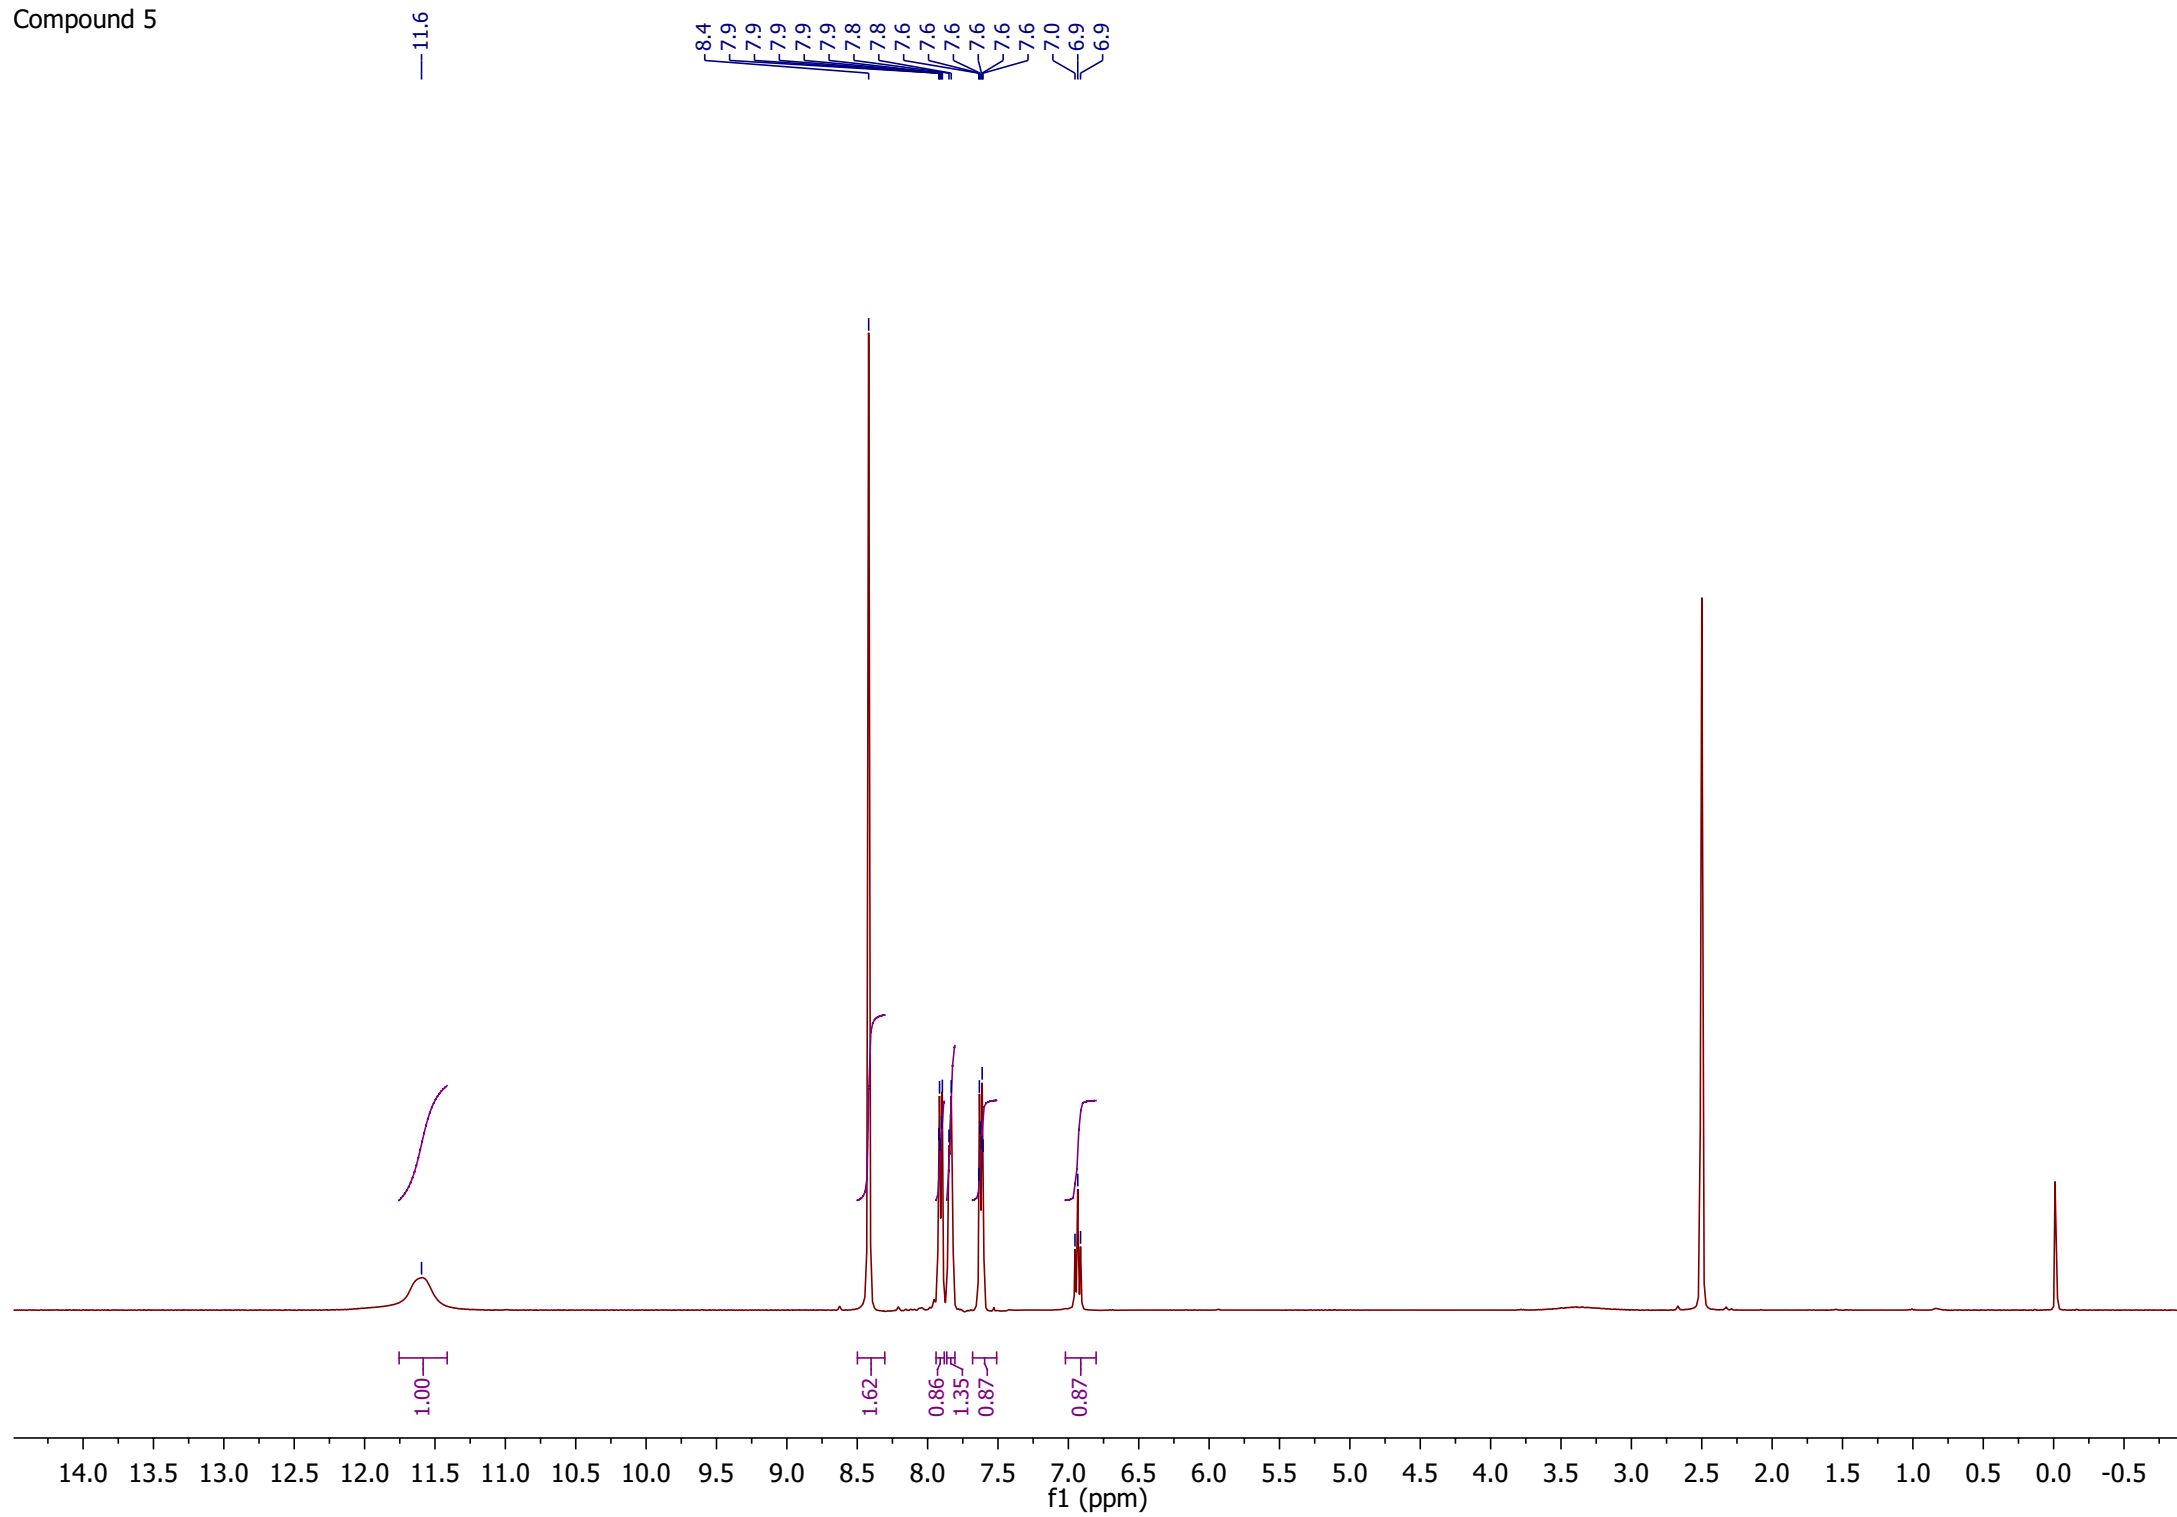

Compound 5

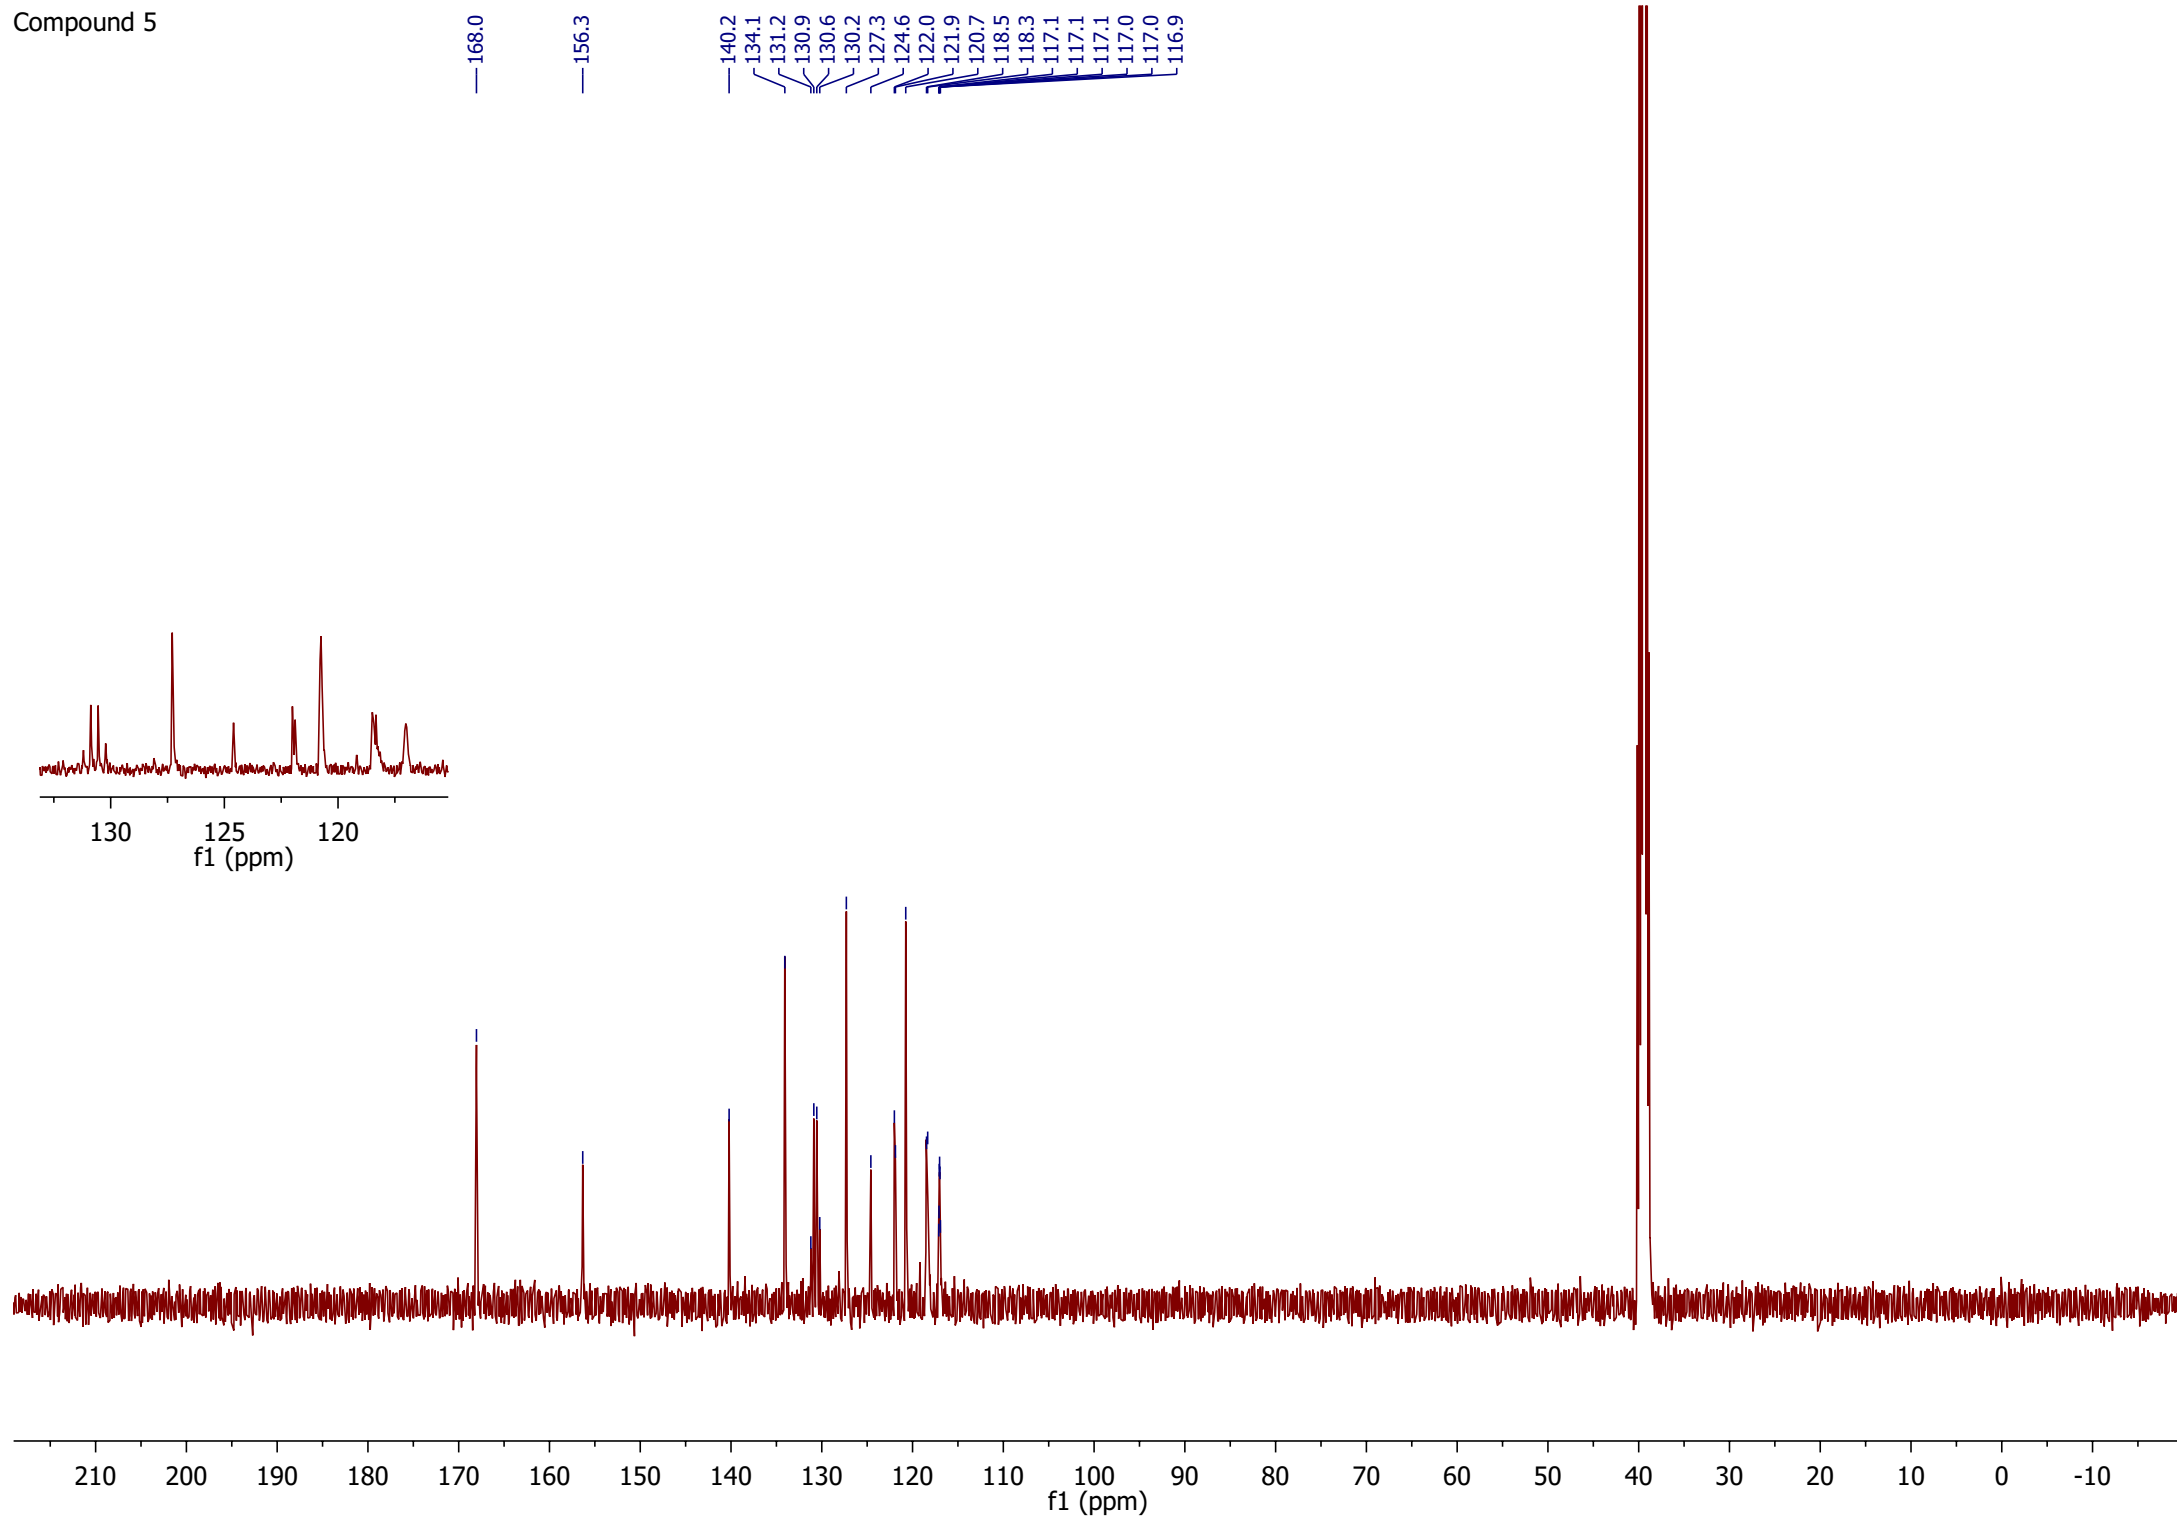



Compound 7

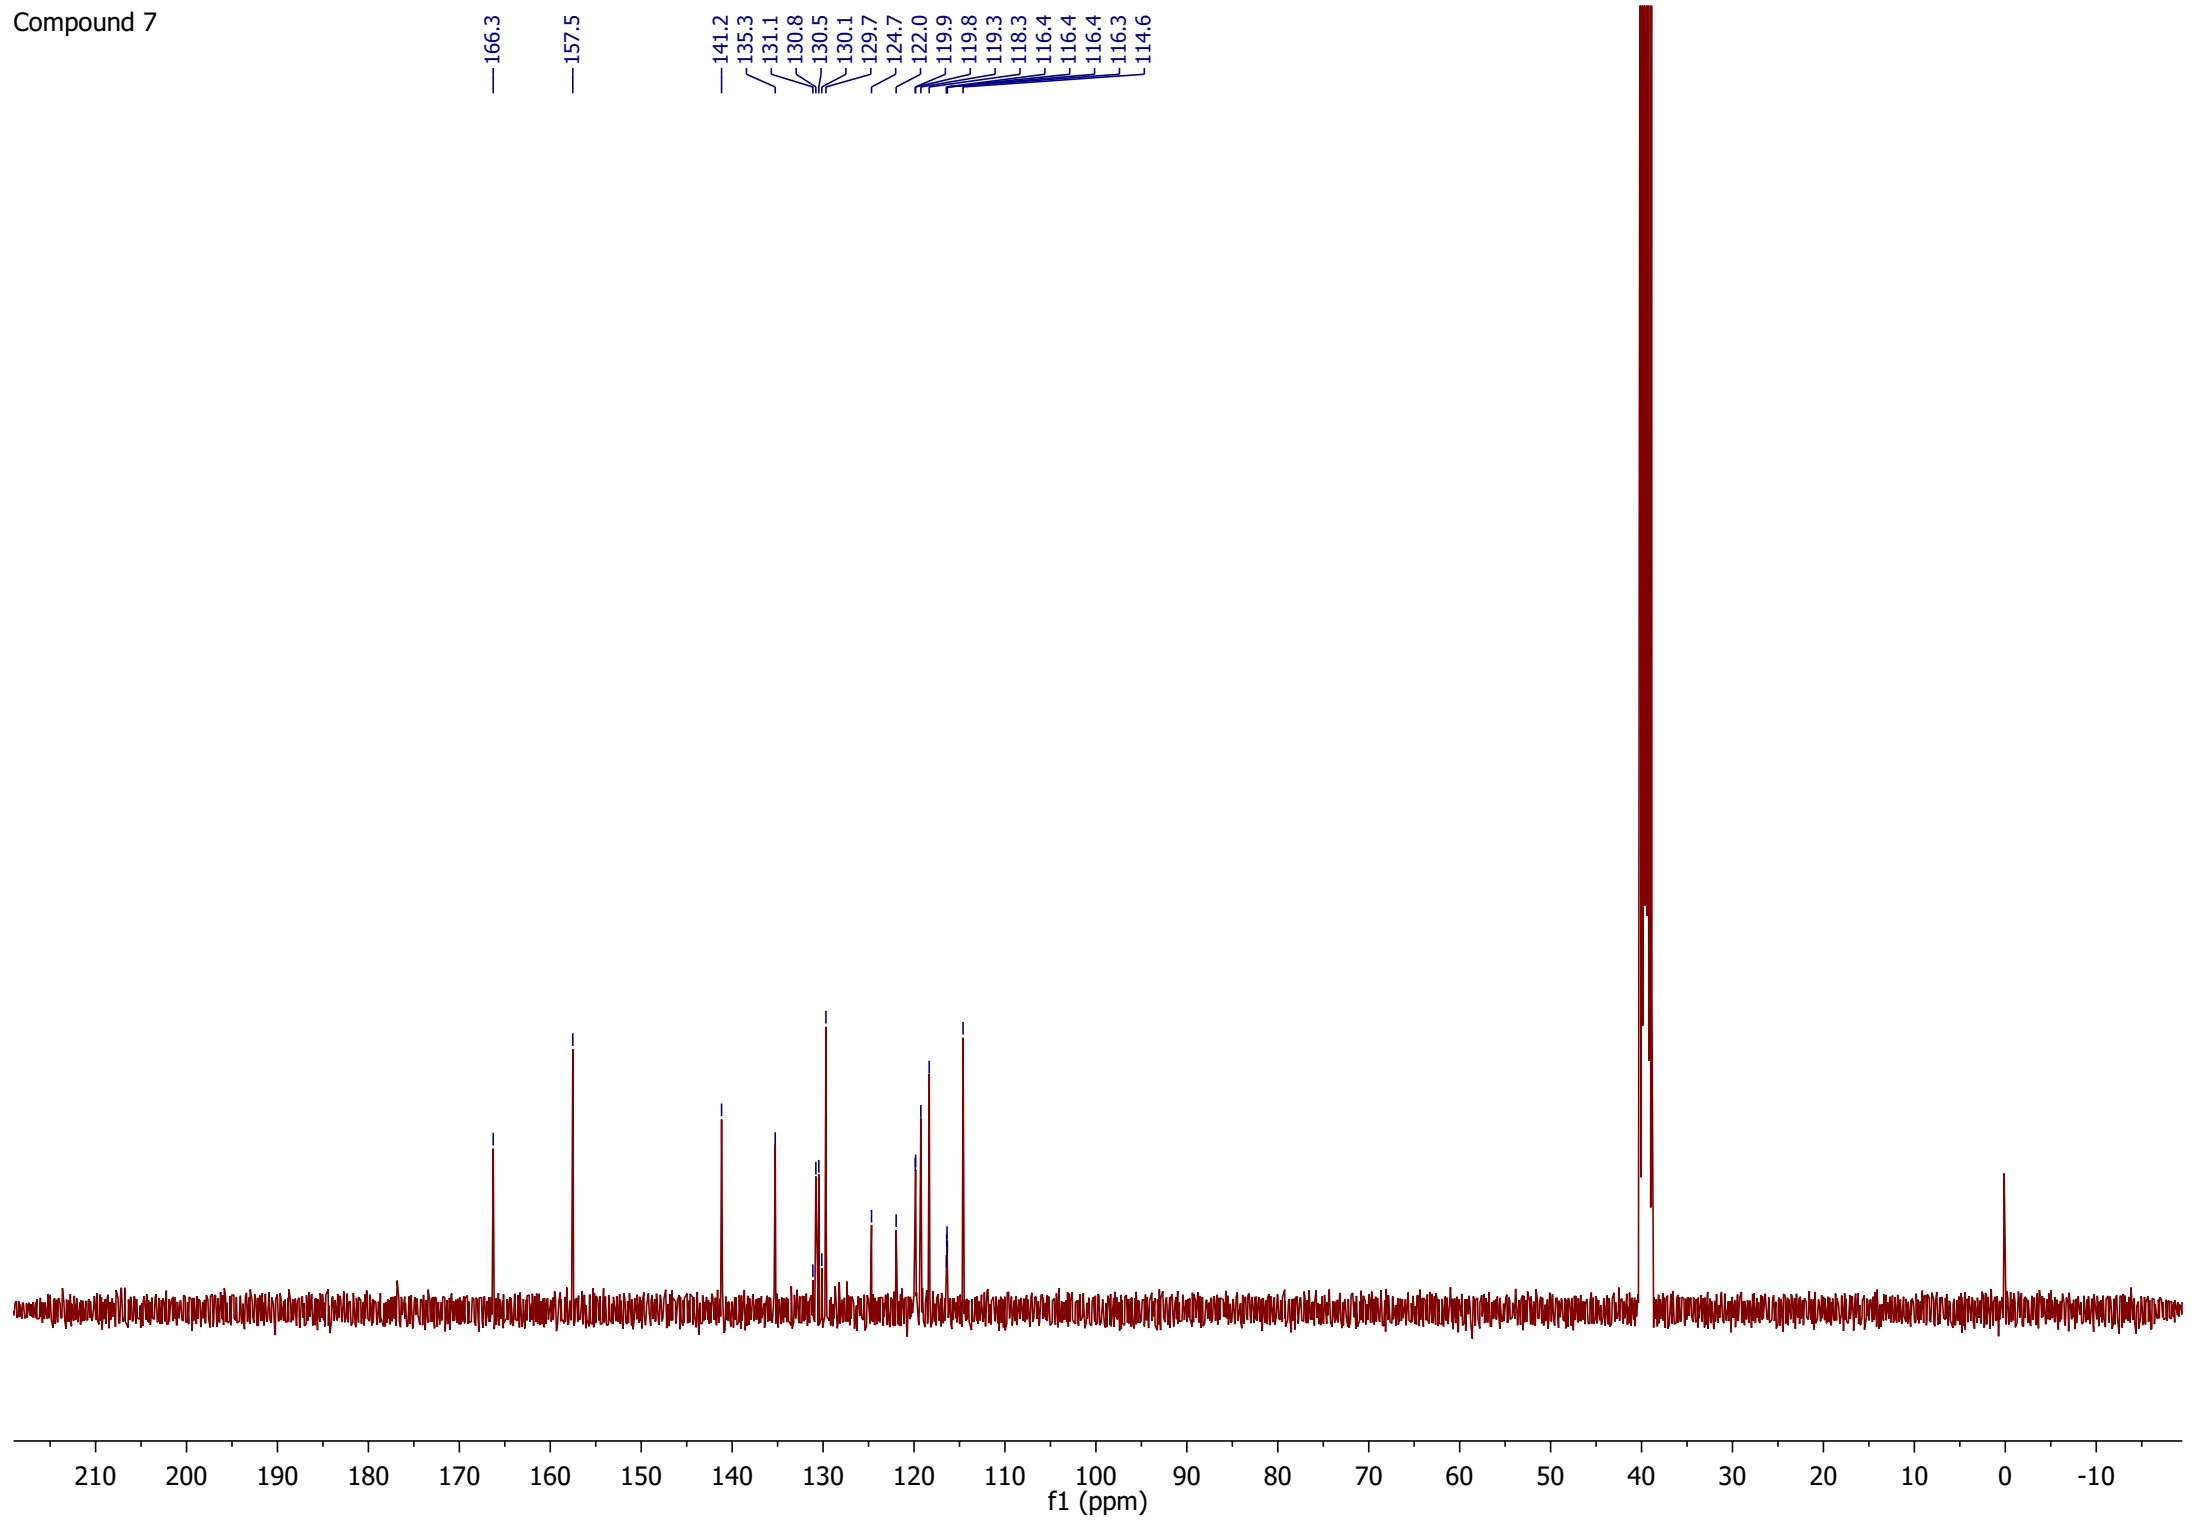

Compound 8

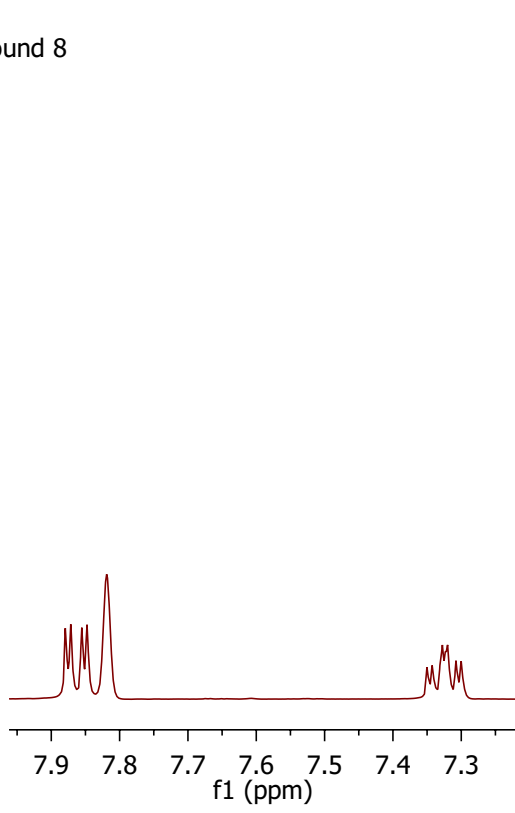

8.5  
7.9  
7.9  
7.8  
7.8  
7.4  
7.3  
7.3  
7.3  
7.3  
7.3  
7.1  
7.1  
7.1  
7.1  
7.1  
7.1  
7.0  
7.0  
7.0  
7.0

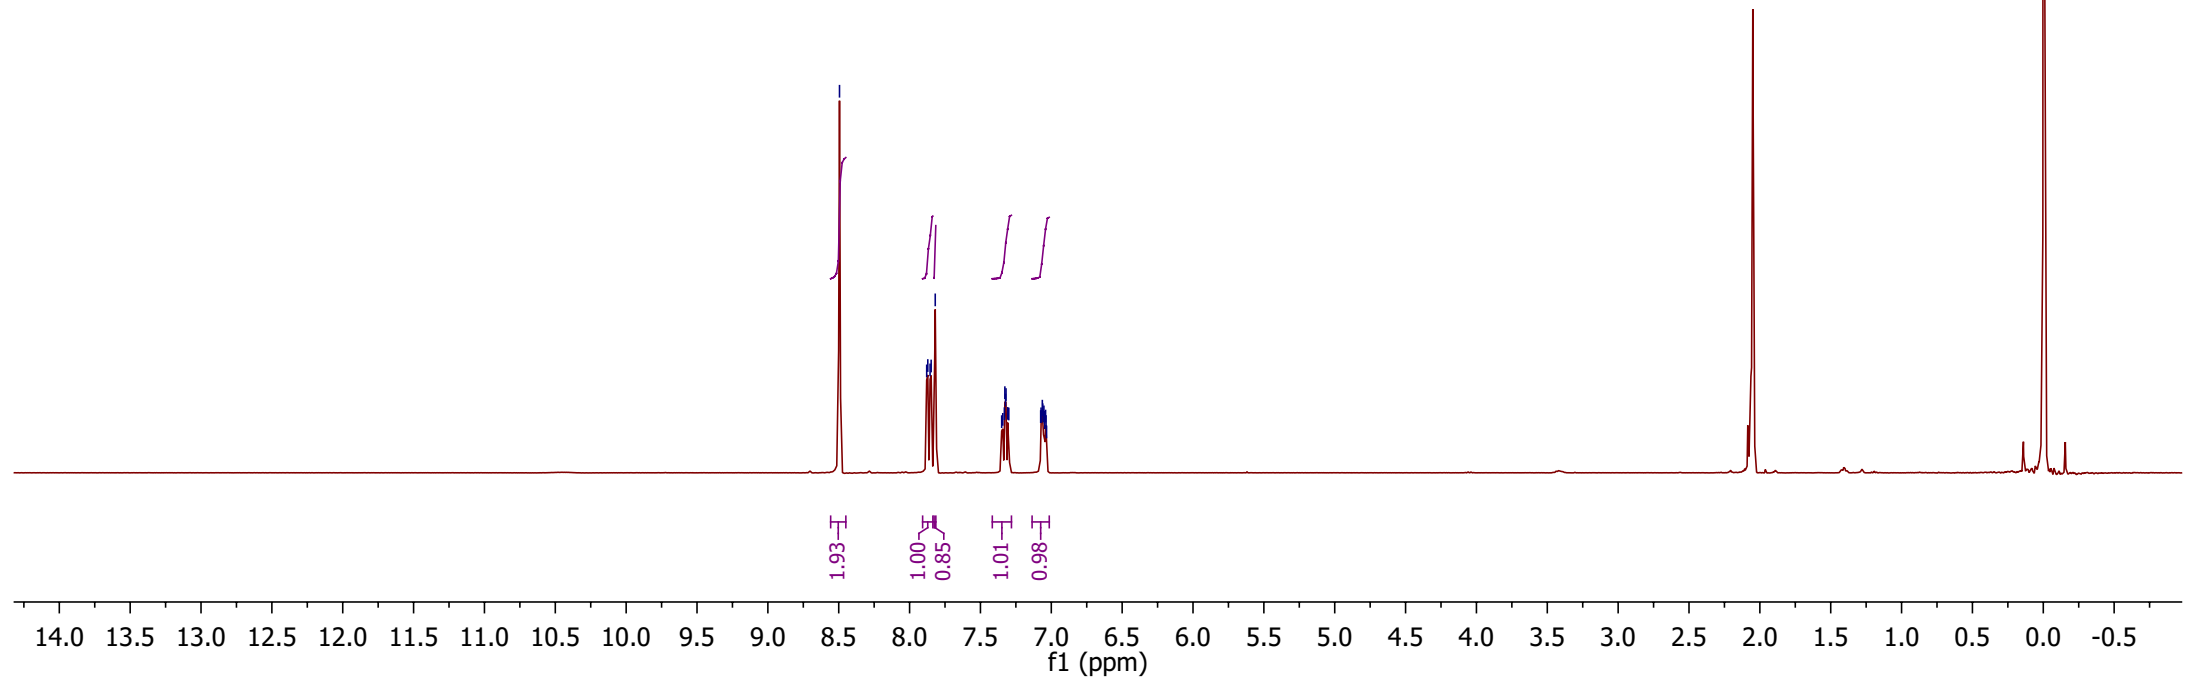



Compound 8

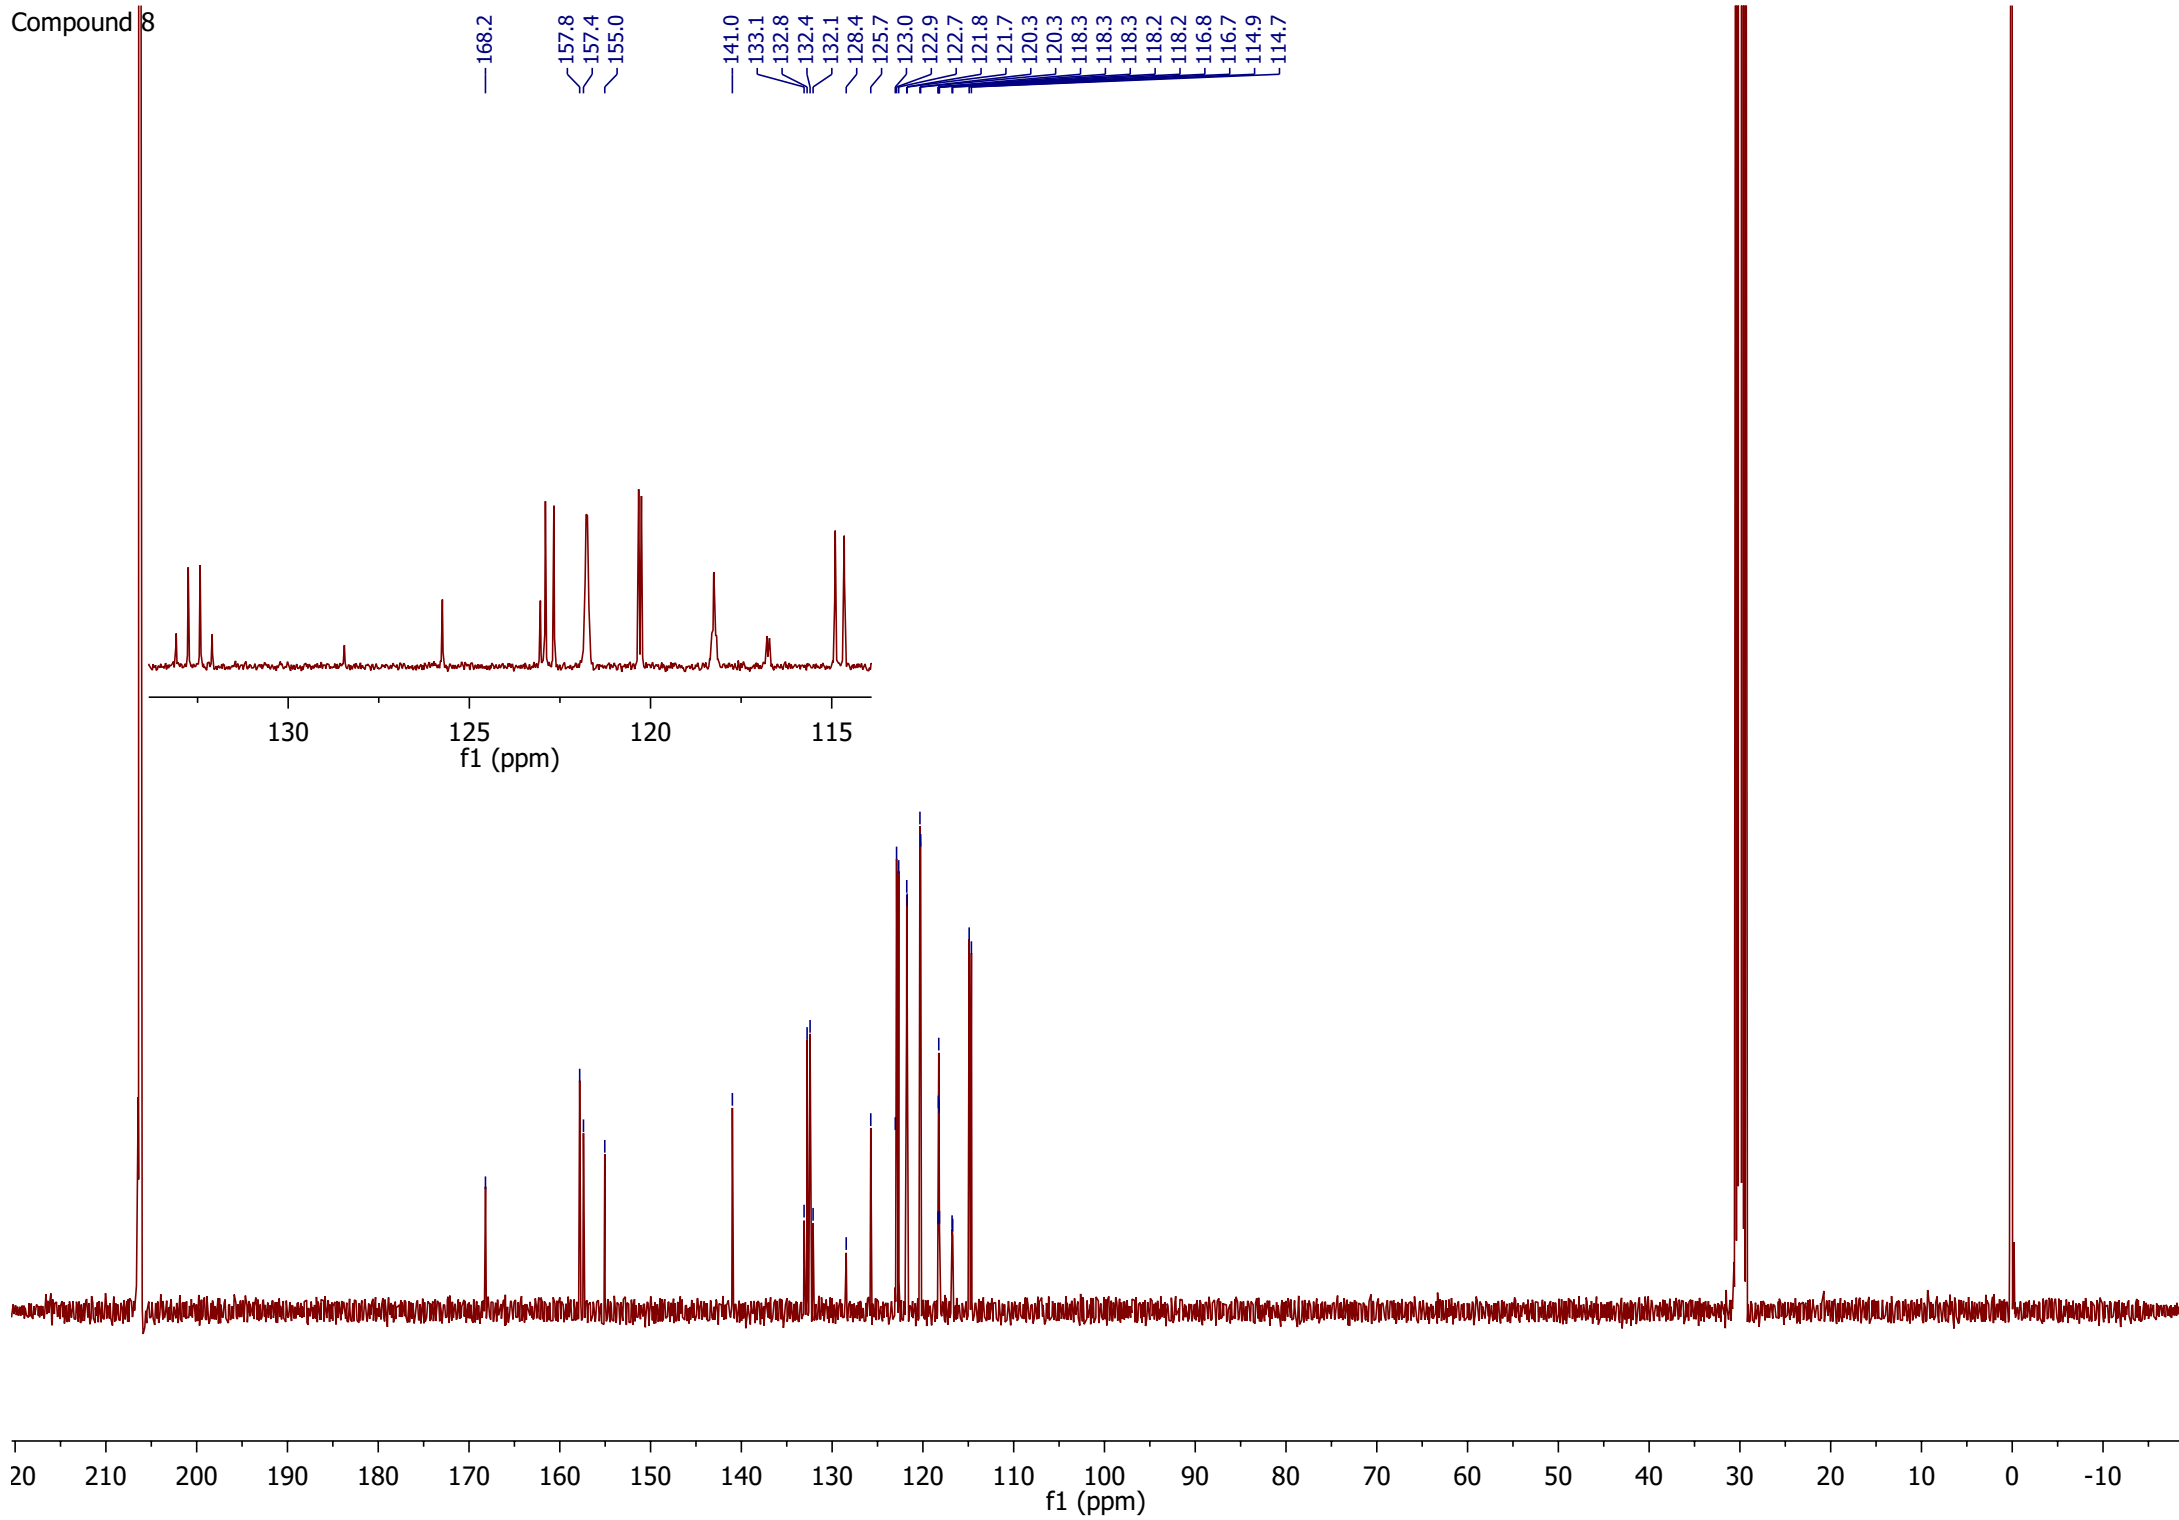

Compound 10

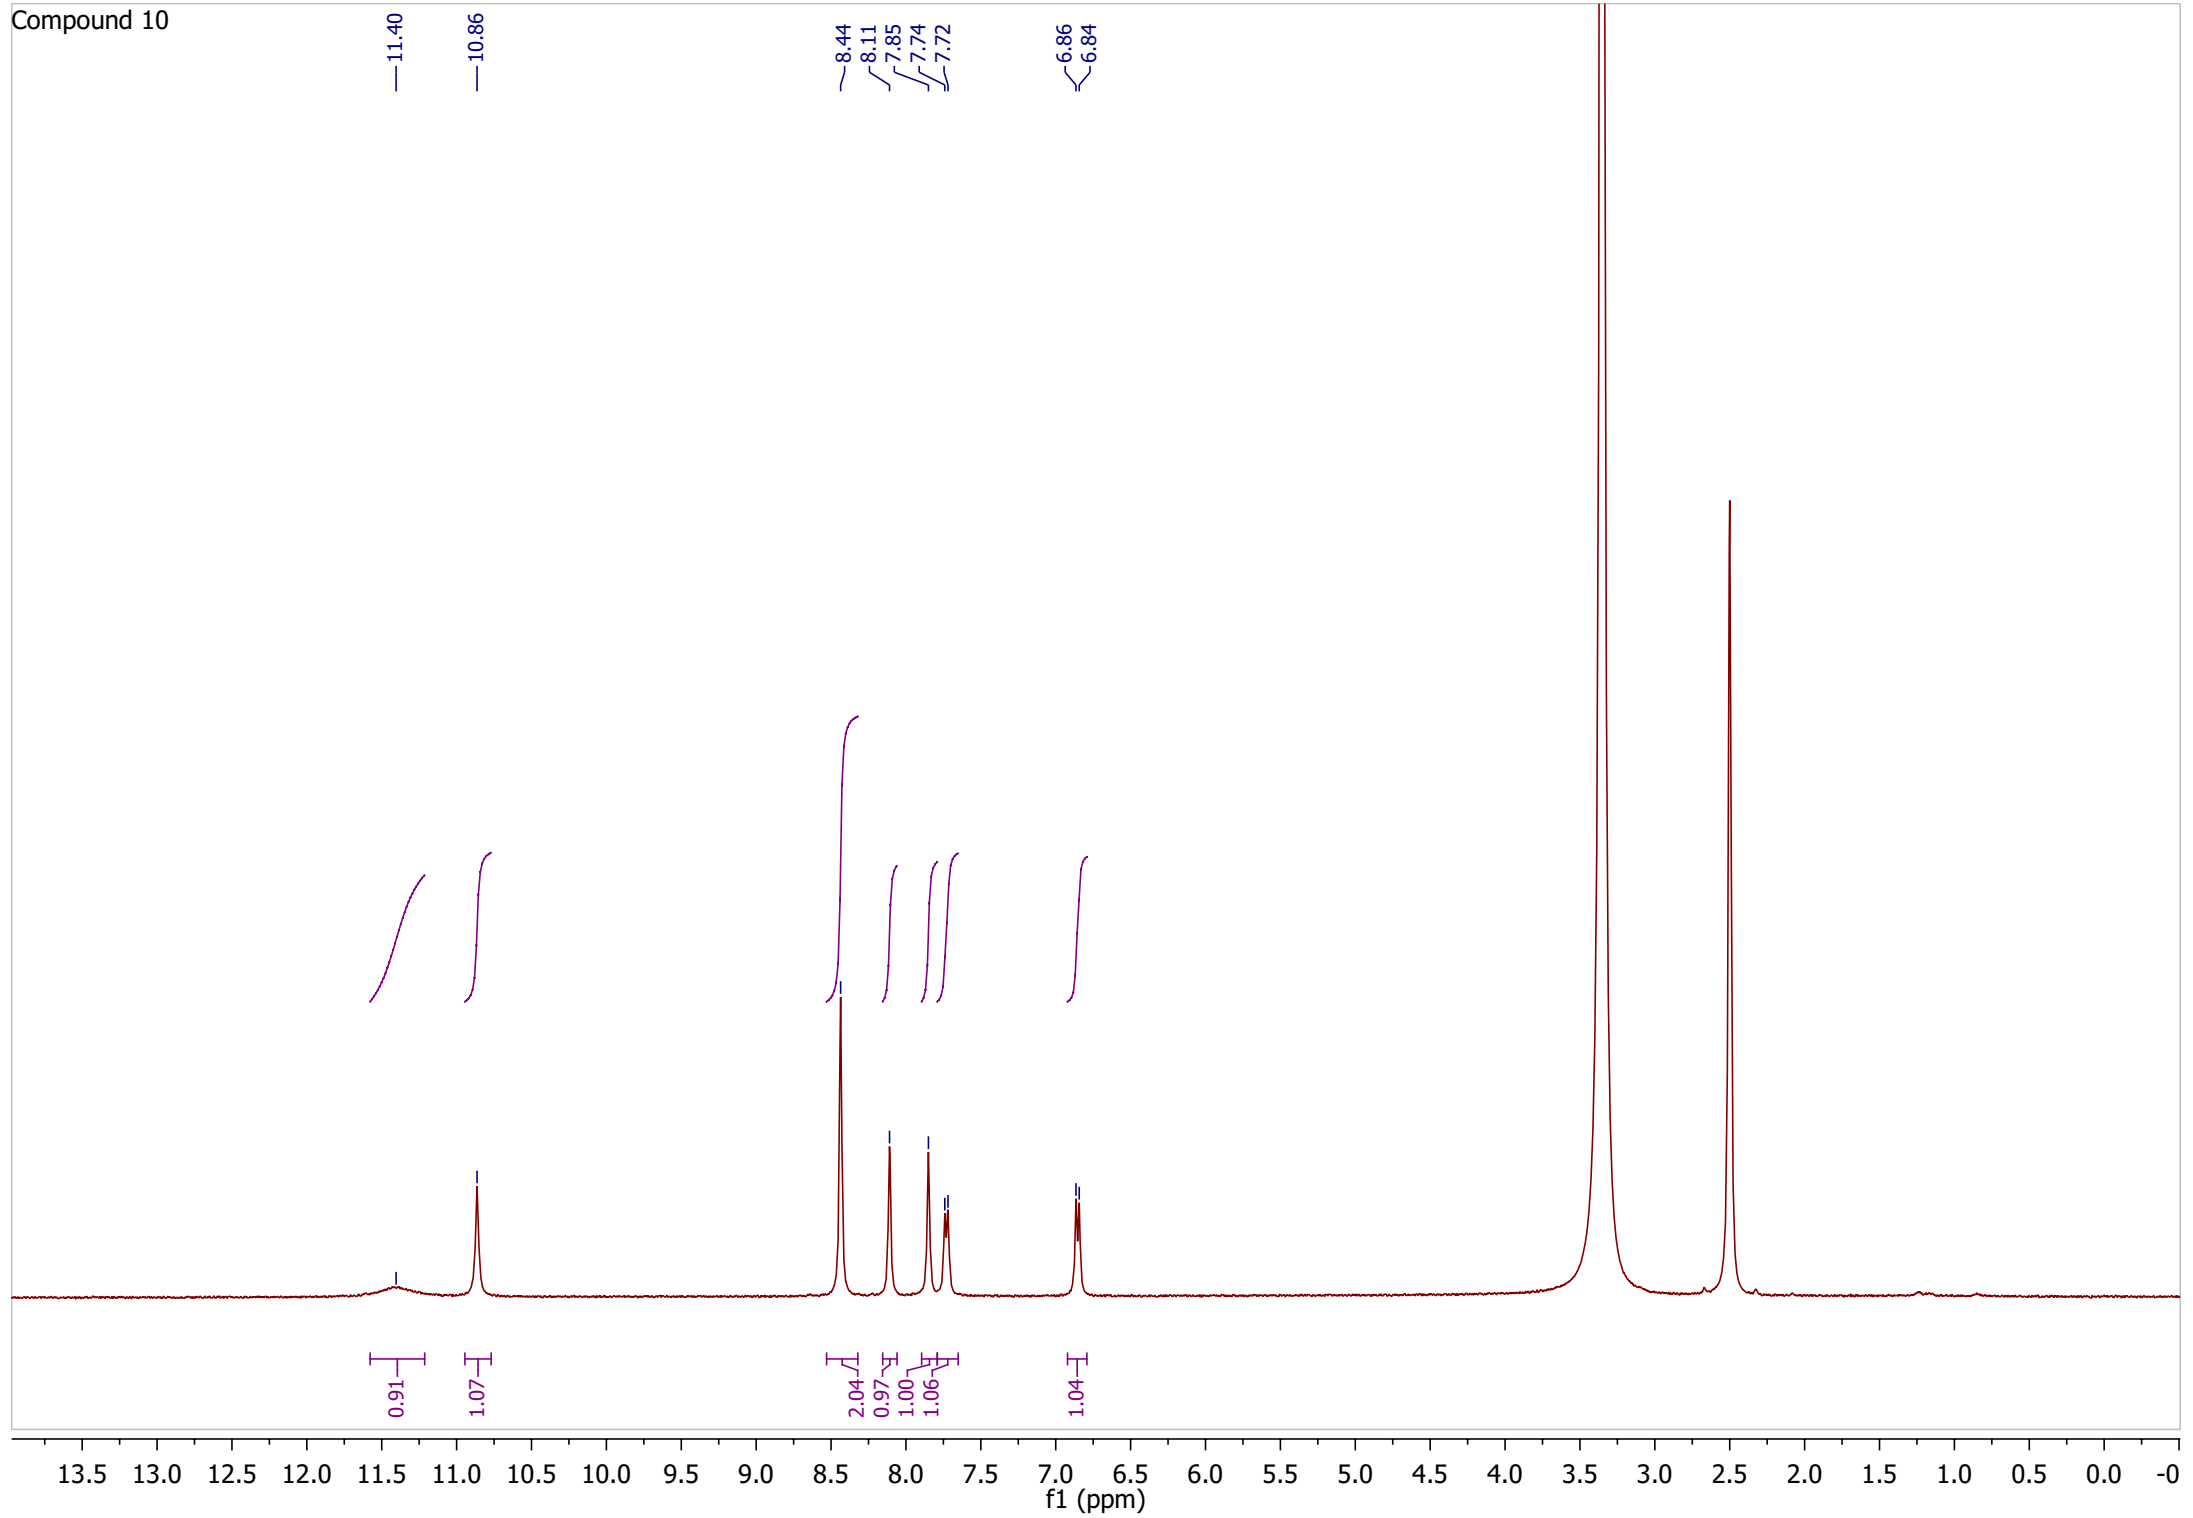

Compound 10

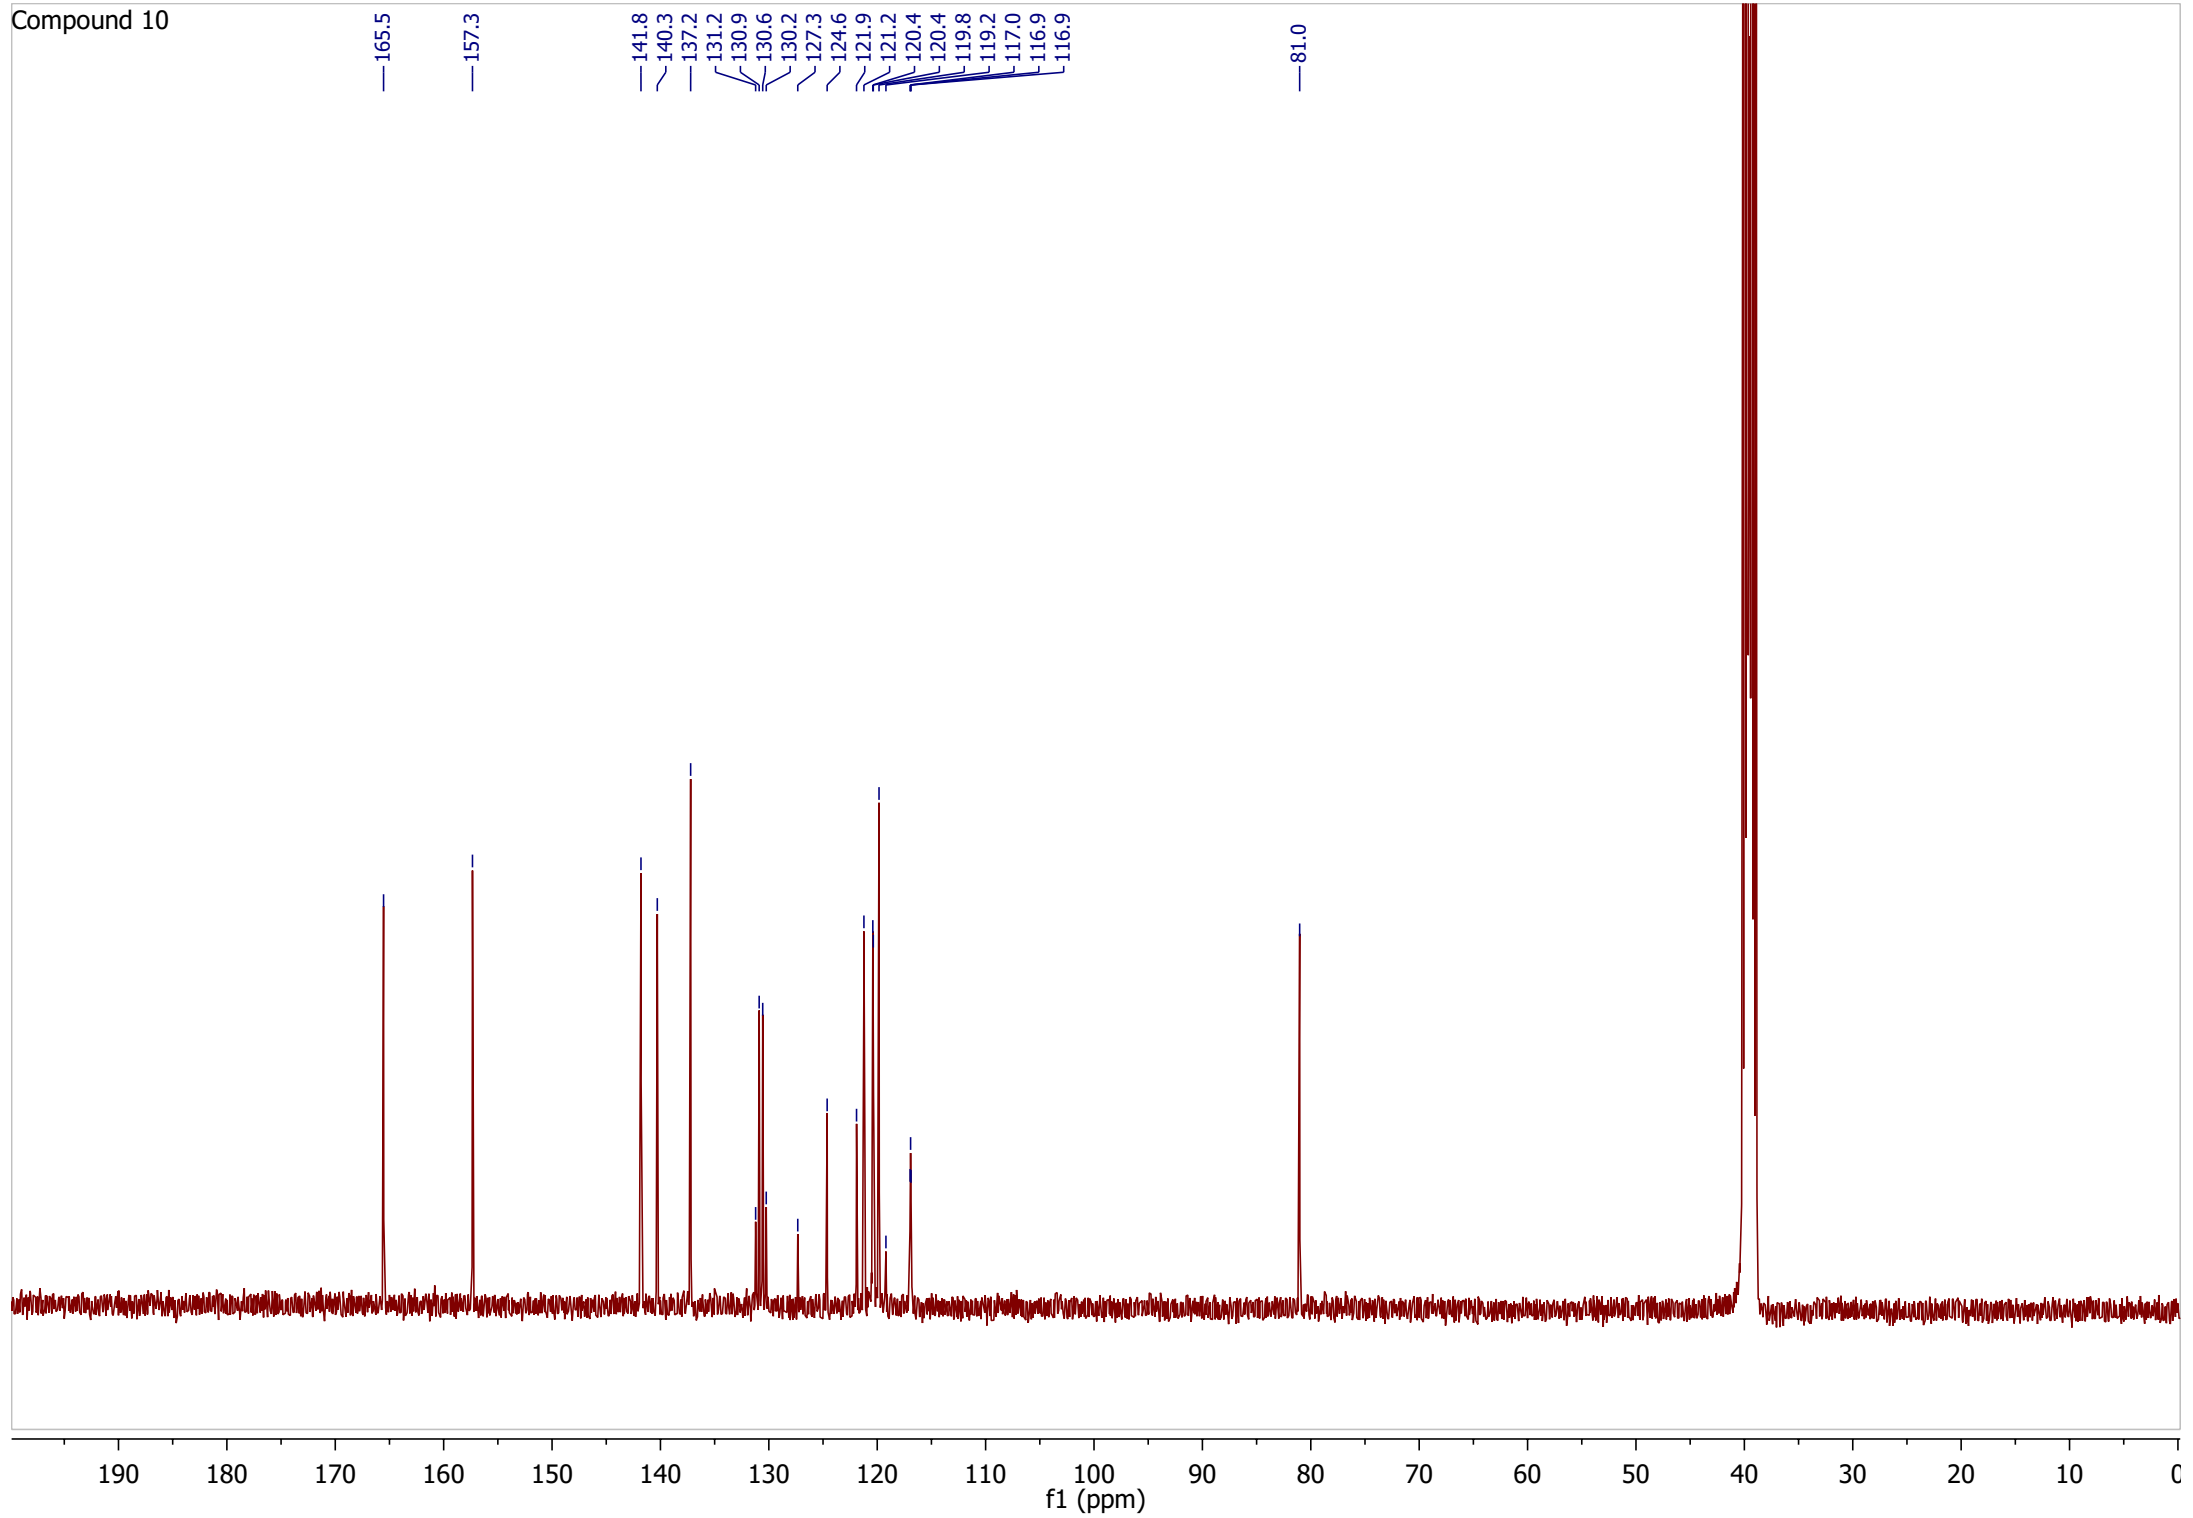

Compound 11

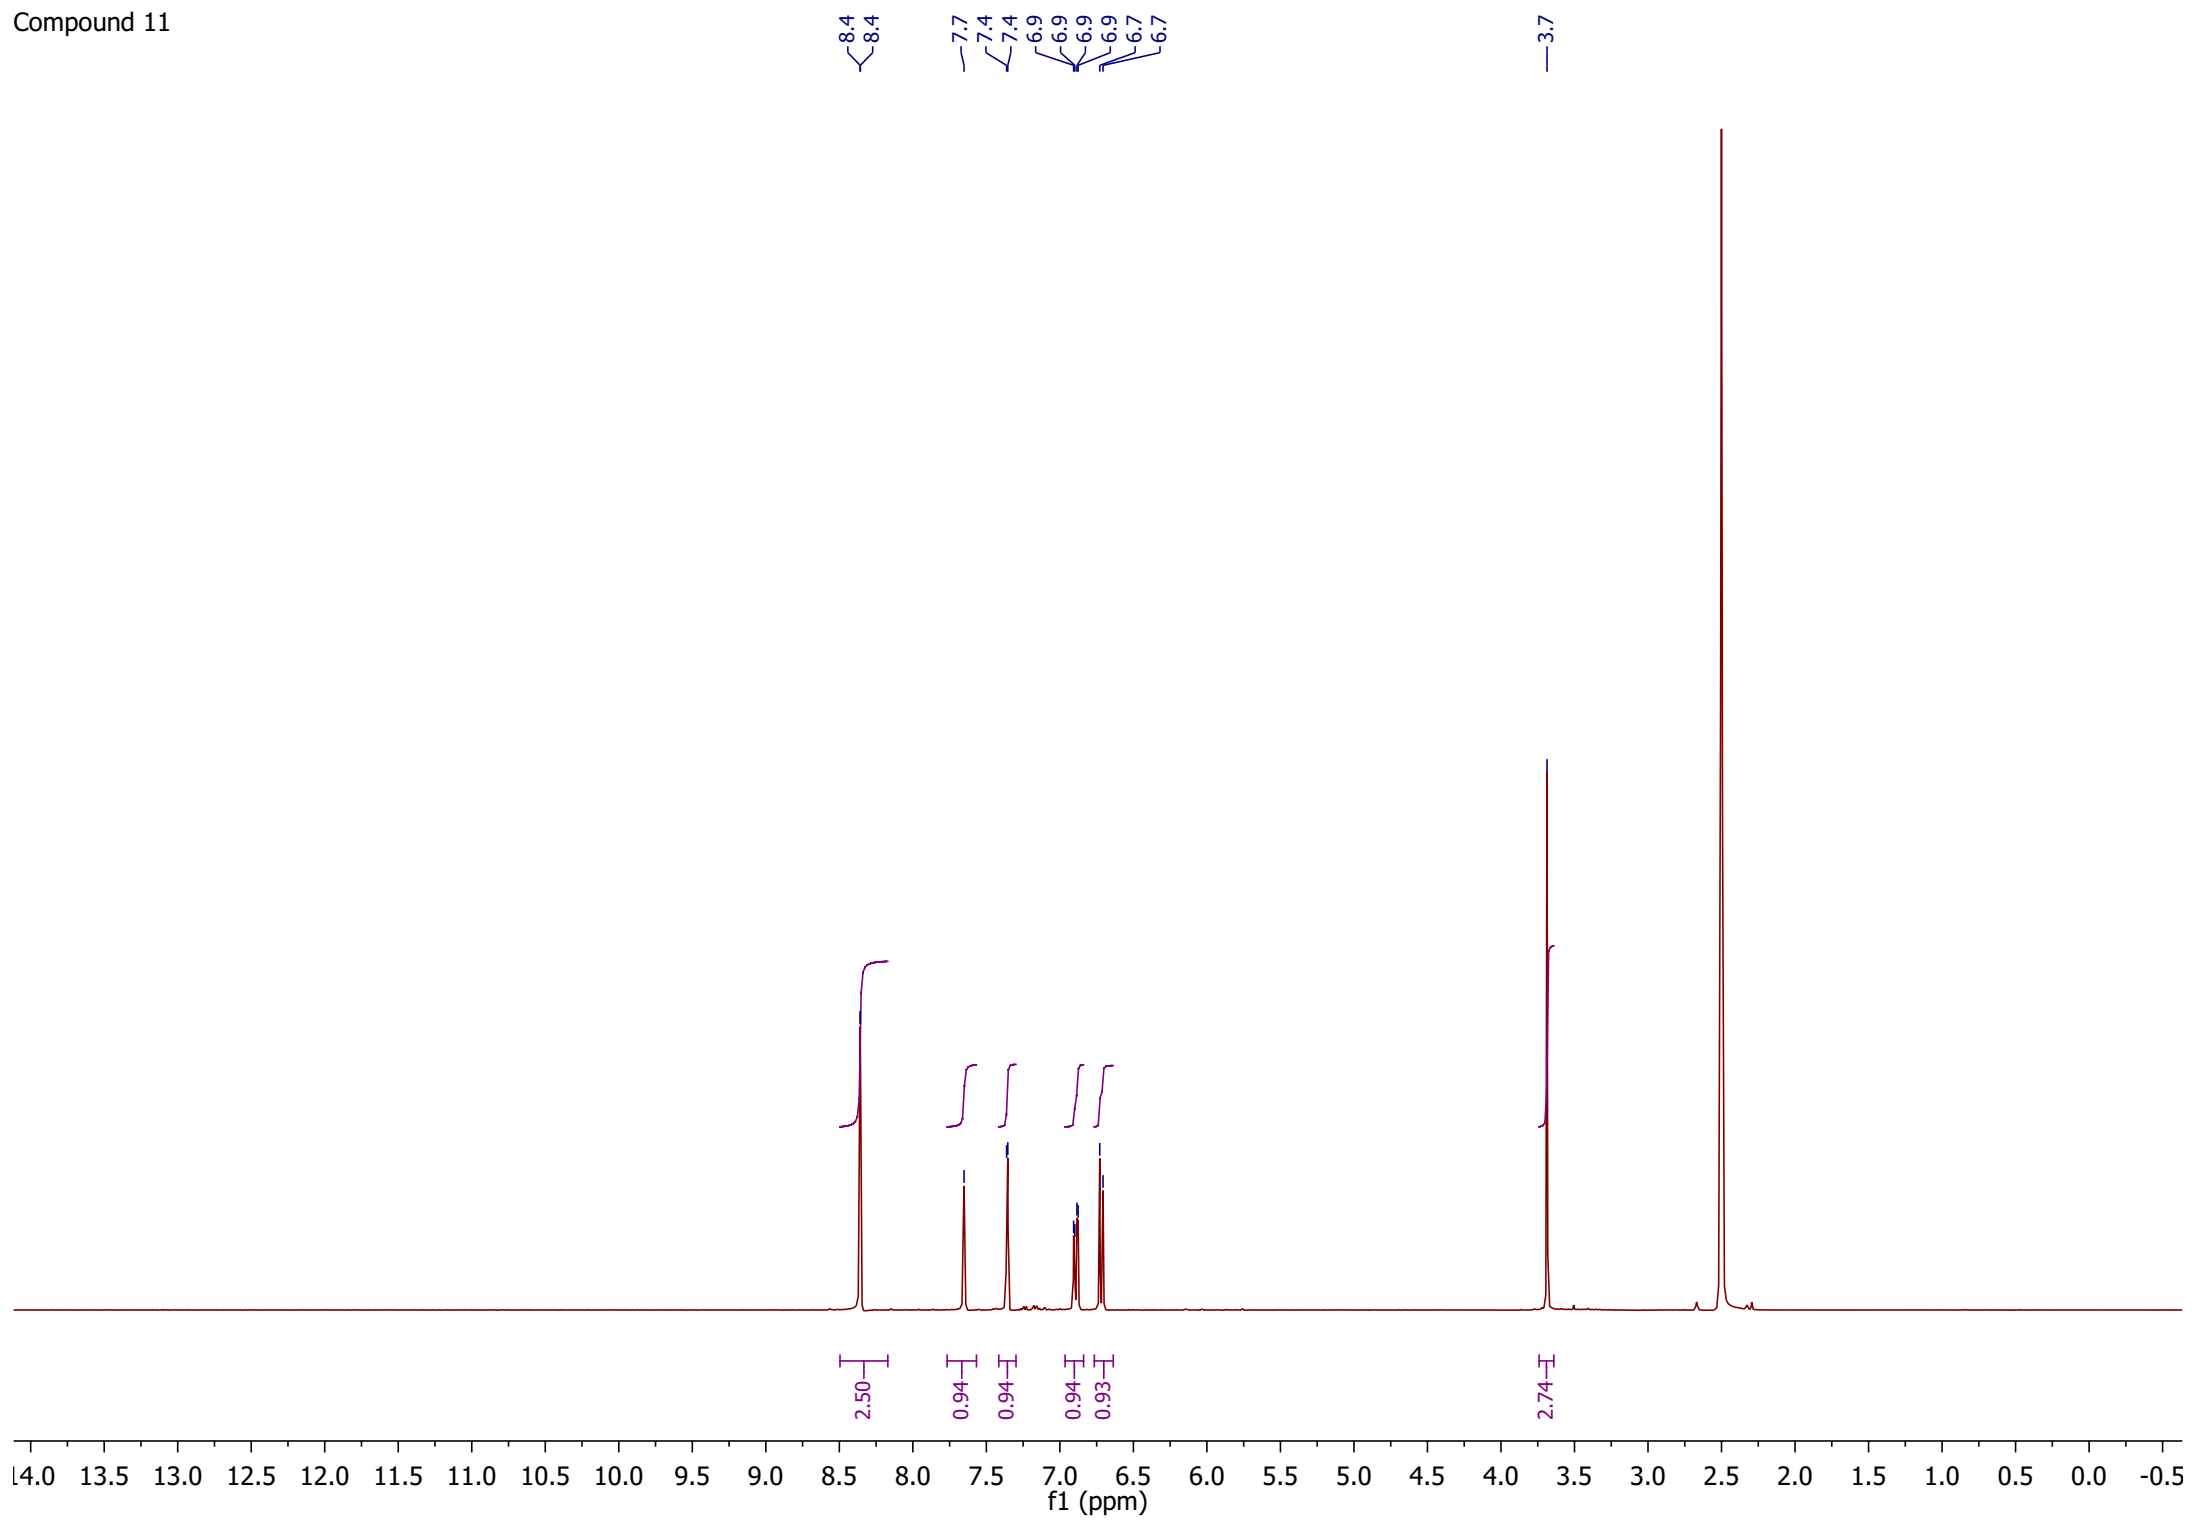

Compound 11

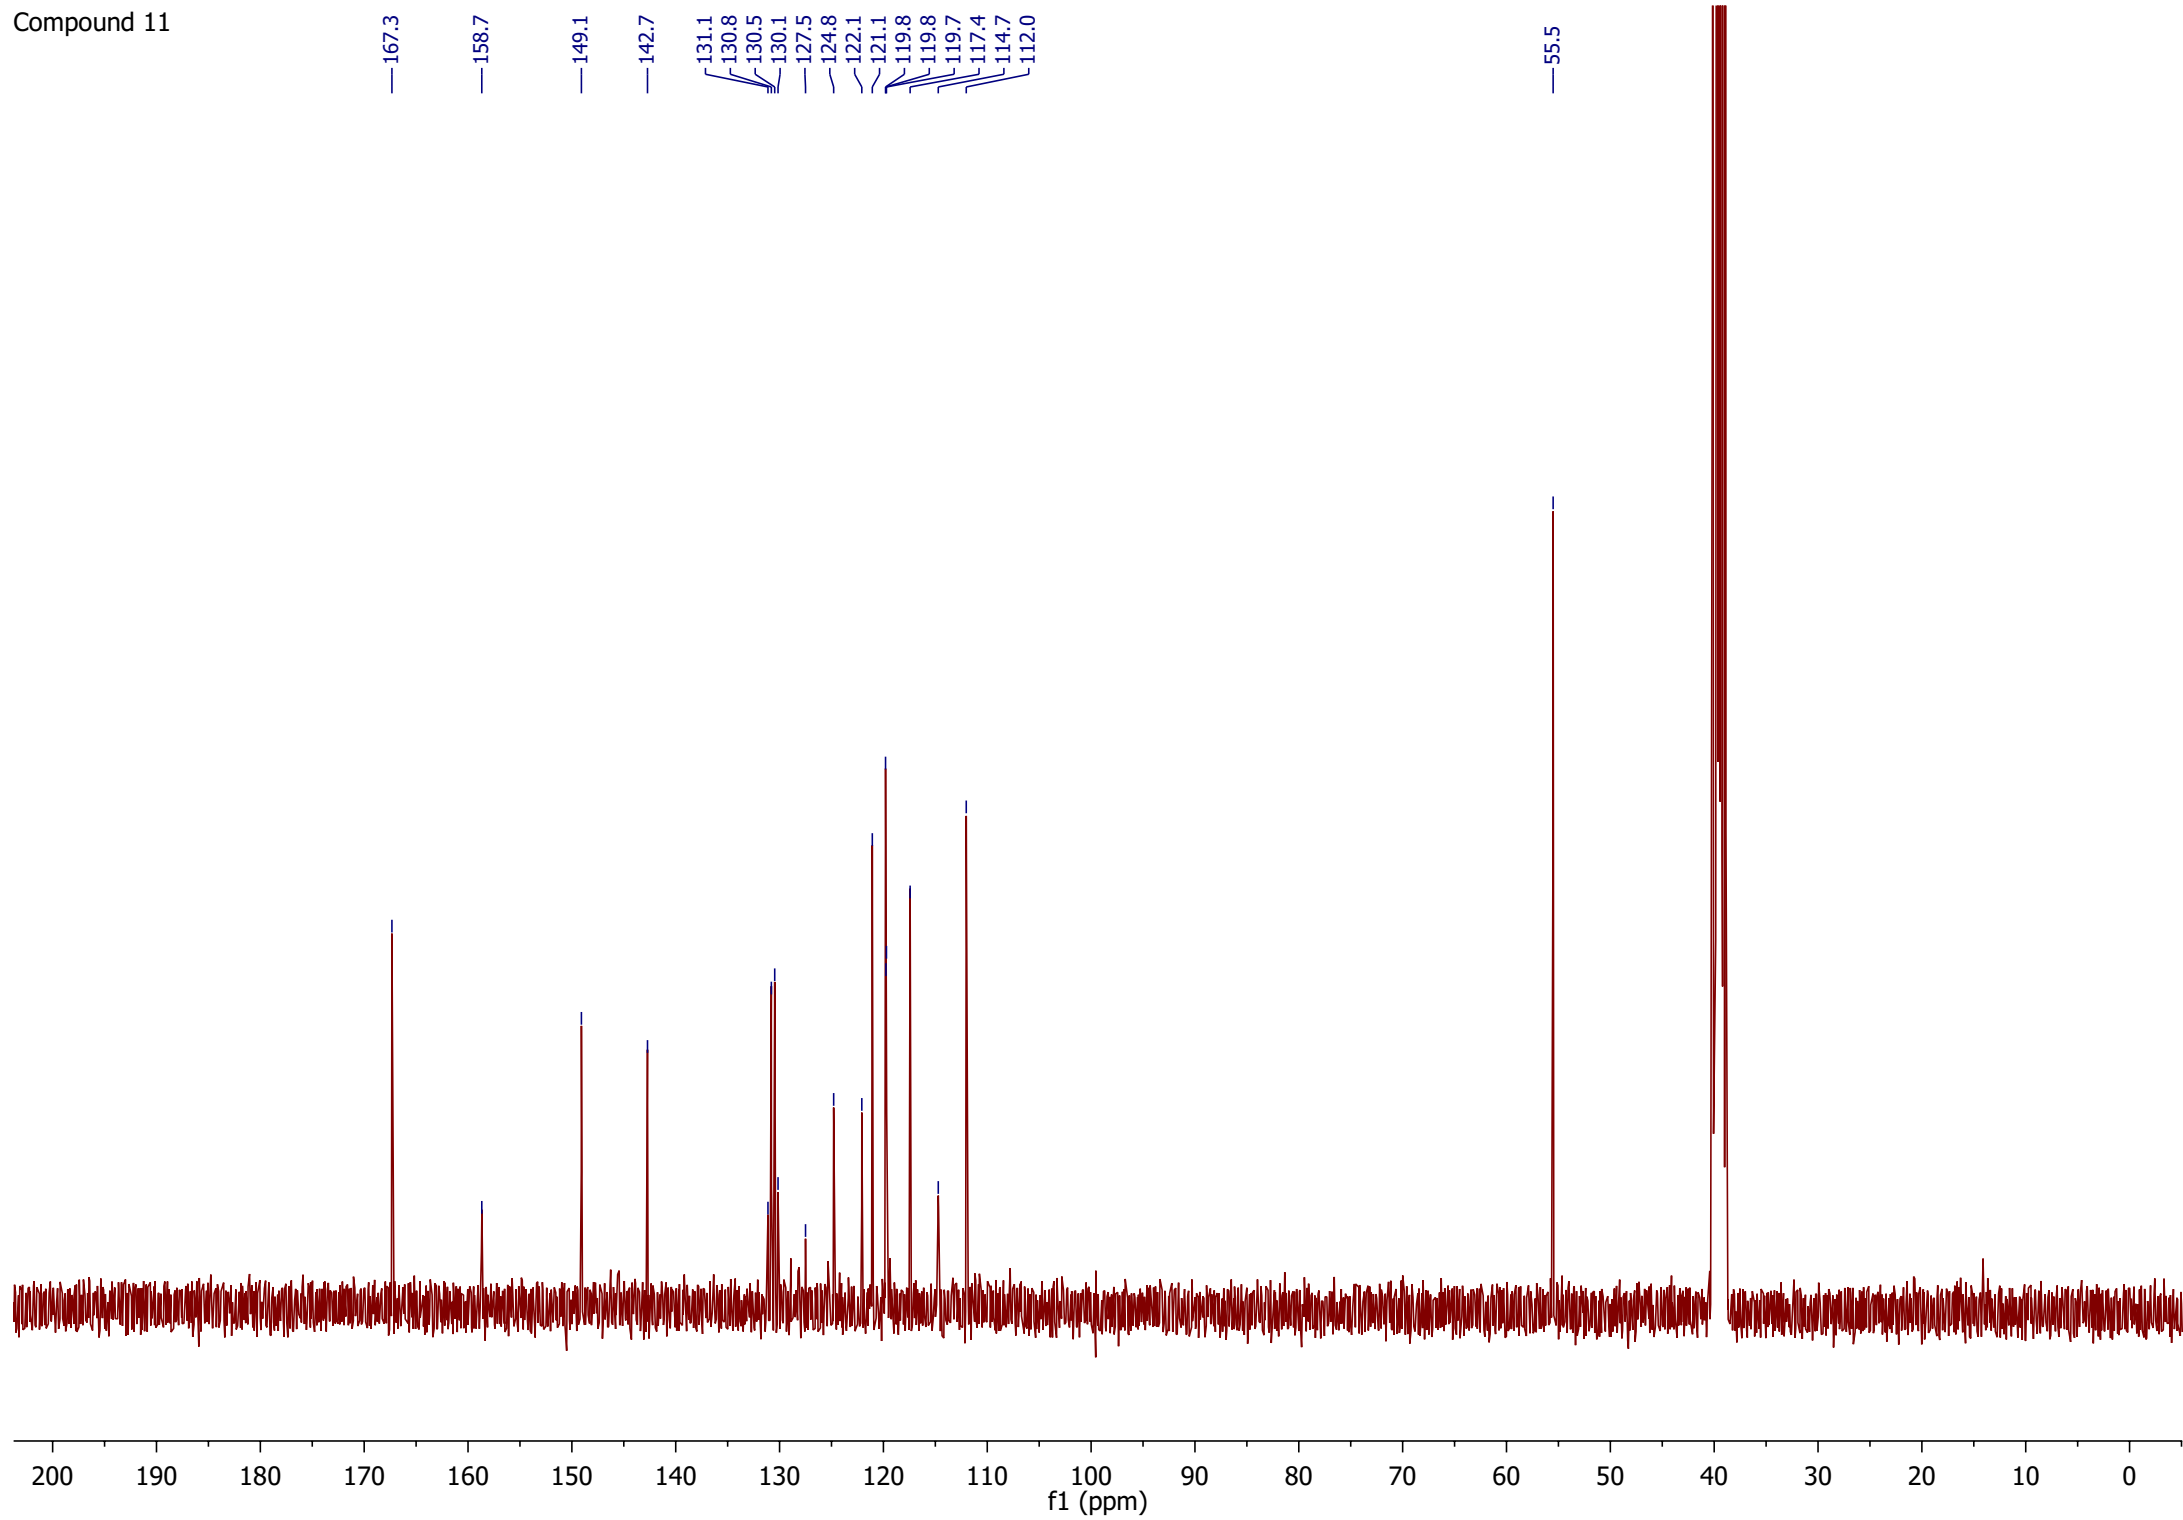

Compound 13

— 11.42  
— 11.08

8.49  
8.17  
8.16  
7.86  
7.80  
7.79  
7.78  
7.77  
7.69  
7.67  
7.49  
7.48  
7.46  
7.37  
7.35  
7.33  
7.11  
7.09

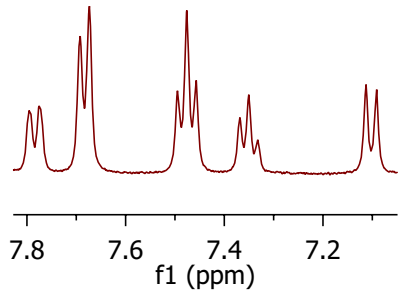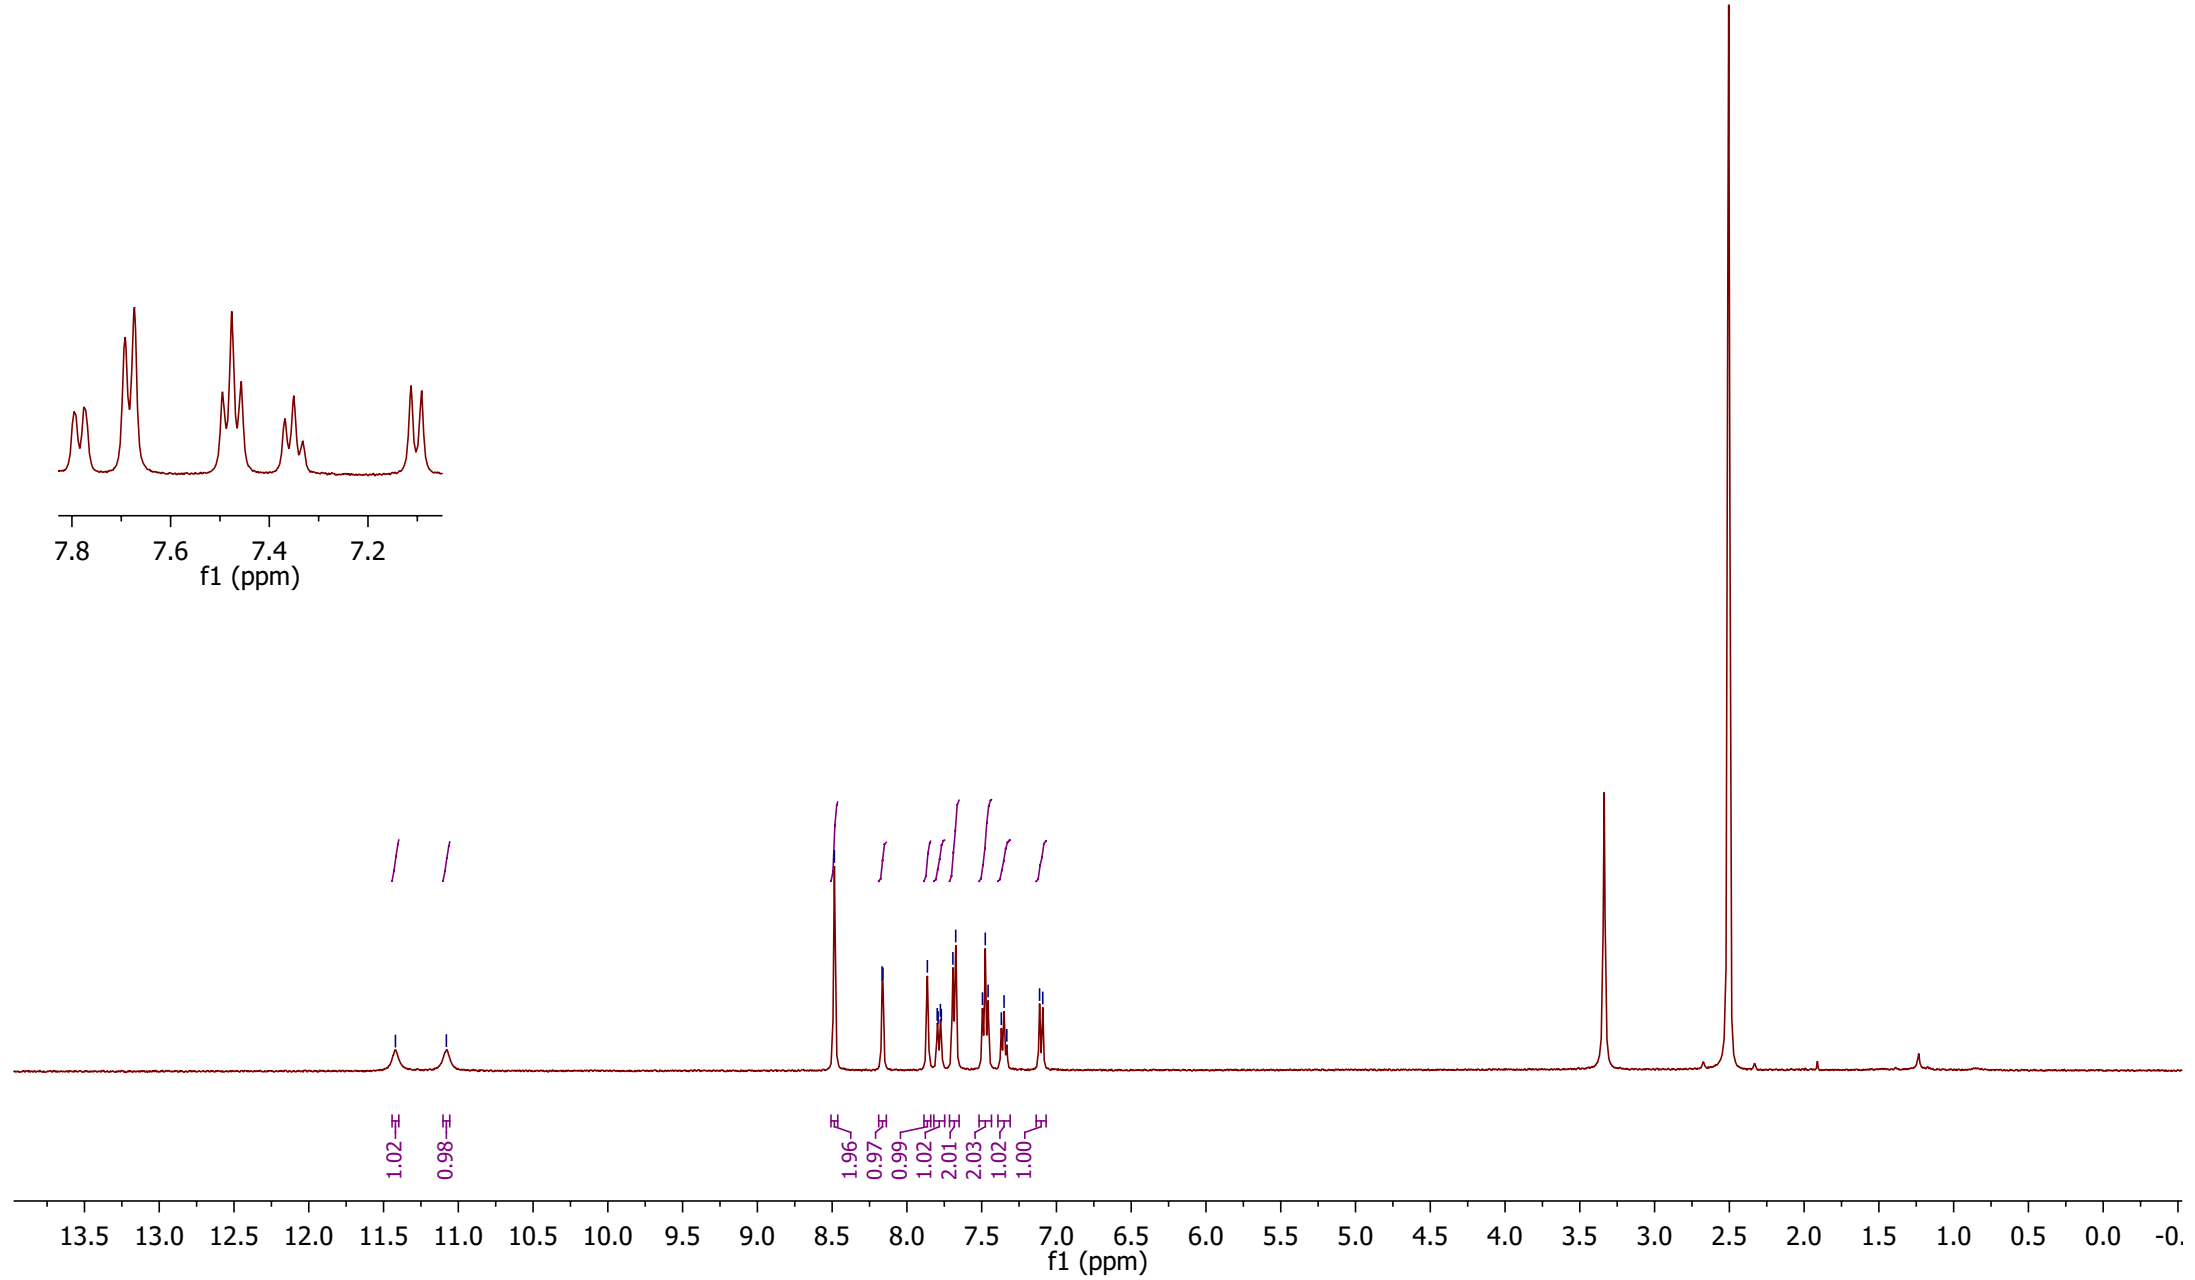

Compound 13

— 167.3

— 159.6

— 140.8  
— 139.5  
— 132.0  
— 130.9  
— 130.6  
— 130.0  
— 128.9  
— 127.2  
— 126.8  
— 126.1  
— 124.7  
— 121.9  
— 120.3  
— 118.5  
— 118.2  
— 116.4

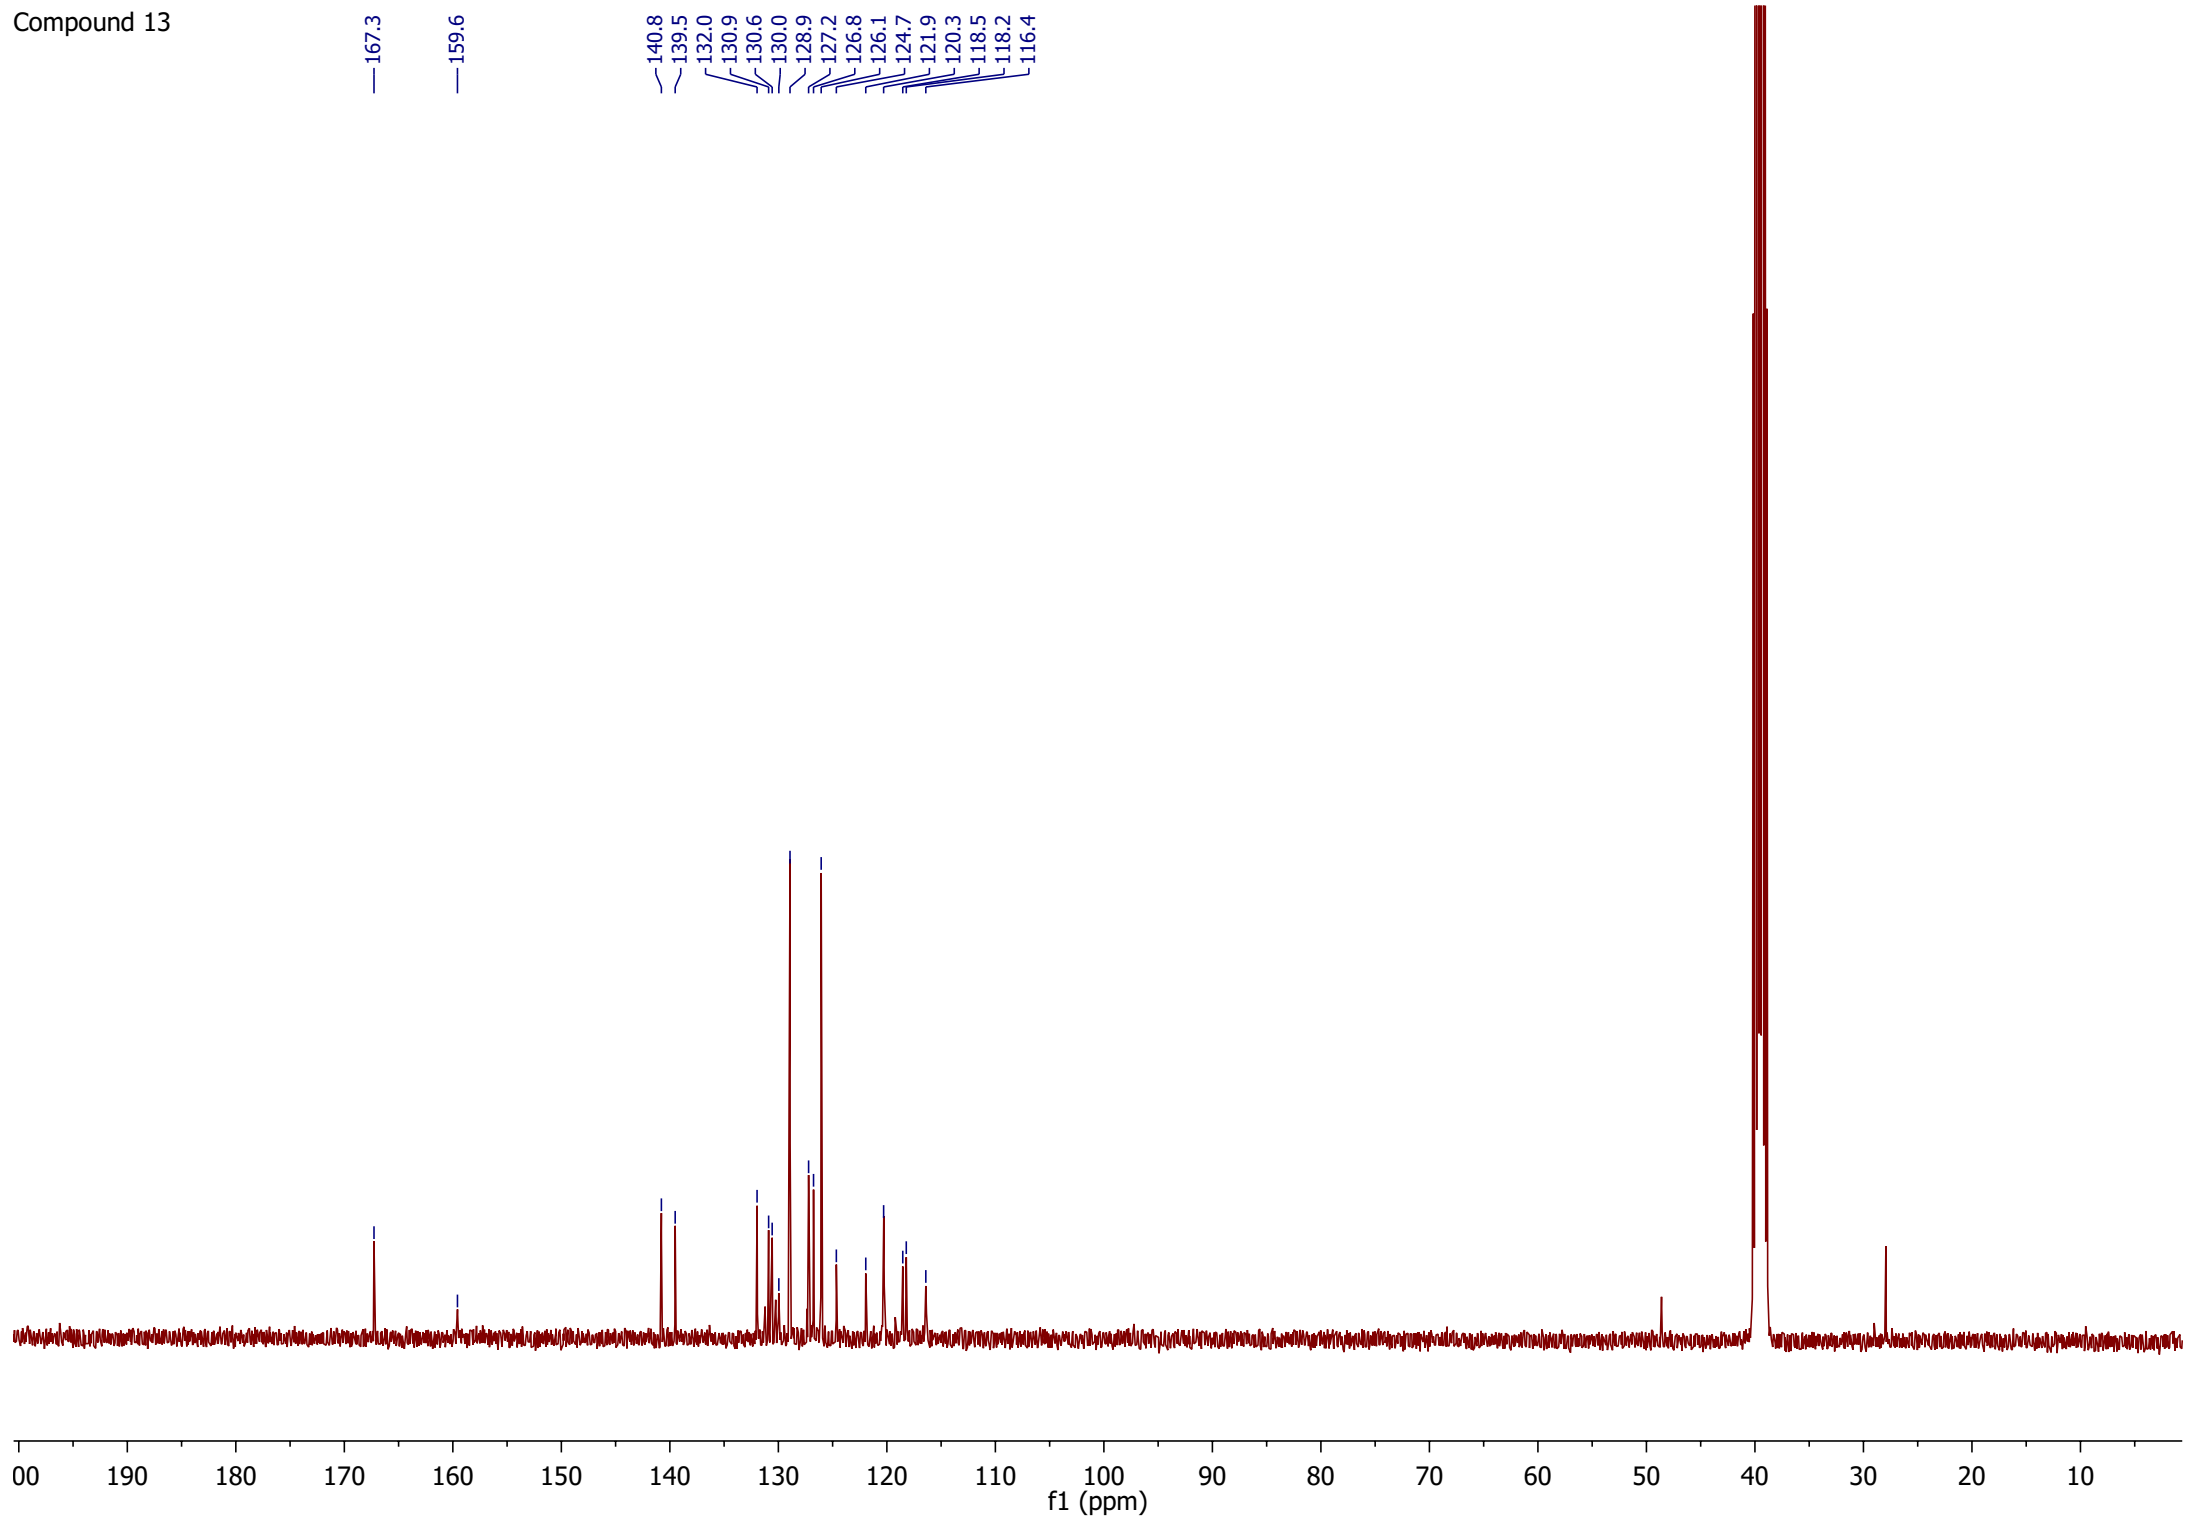

Compound 14

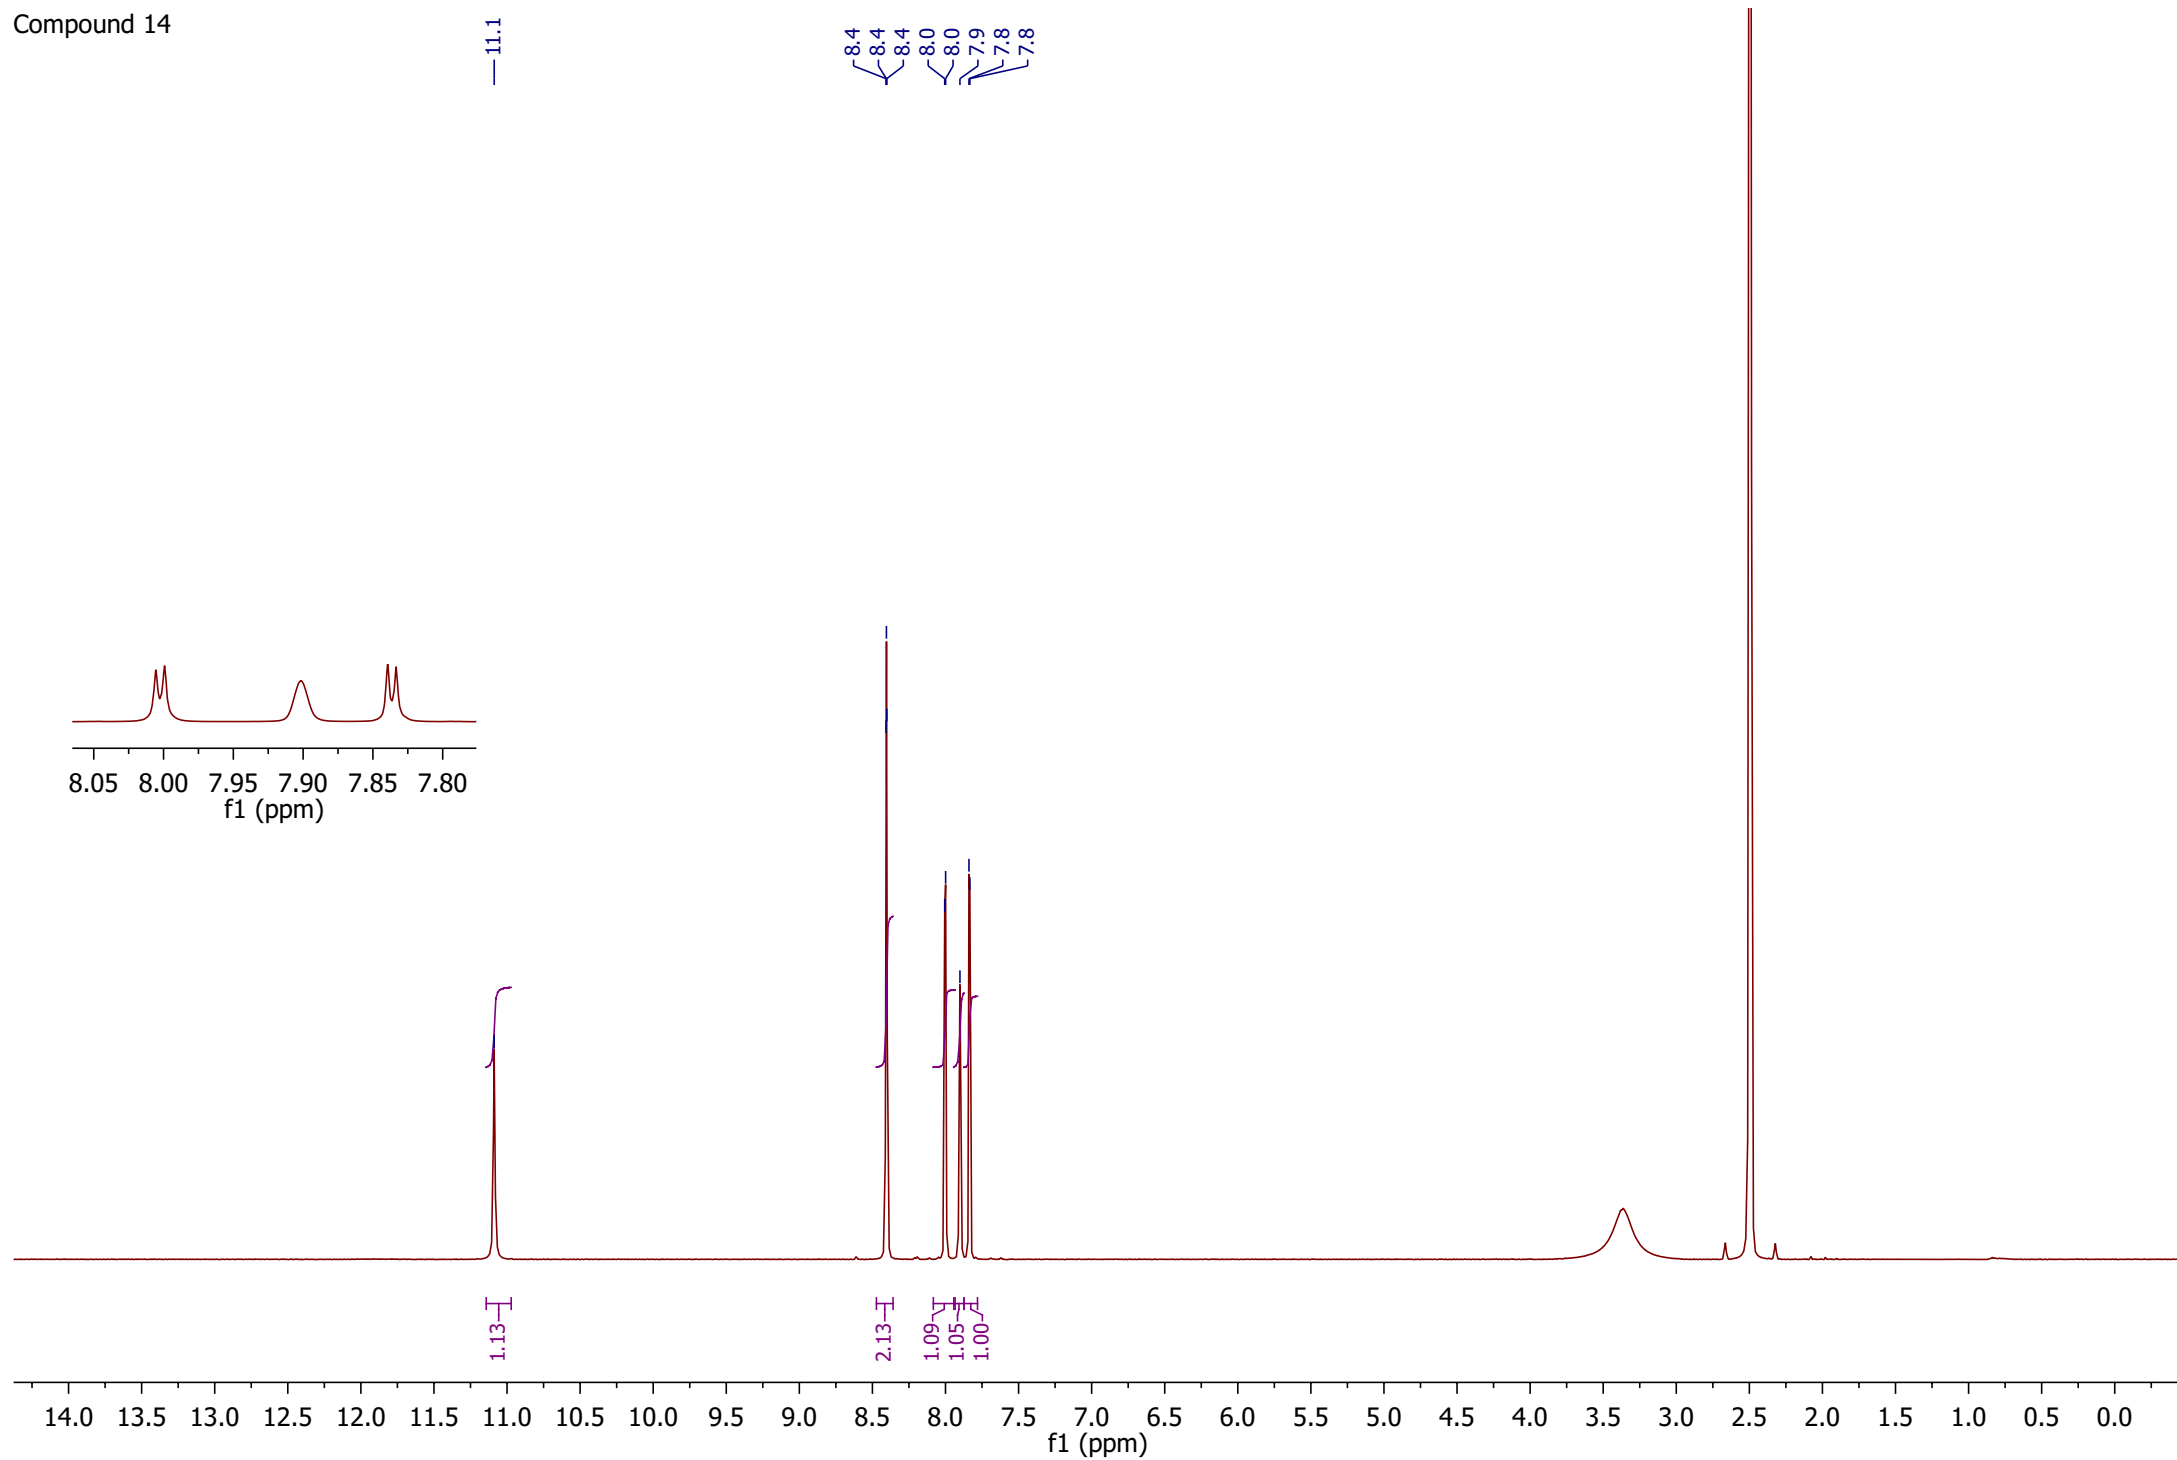



Compound 14

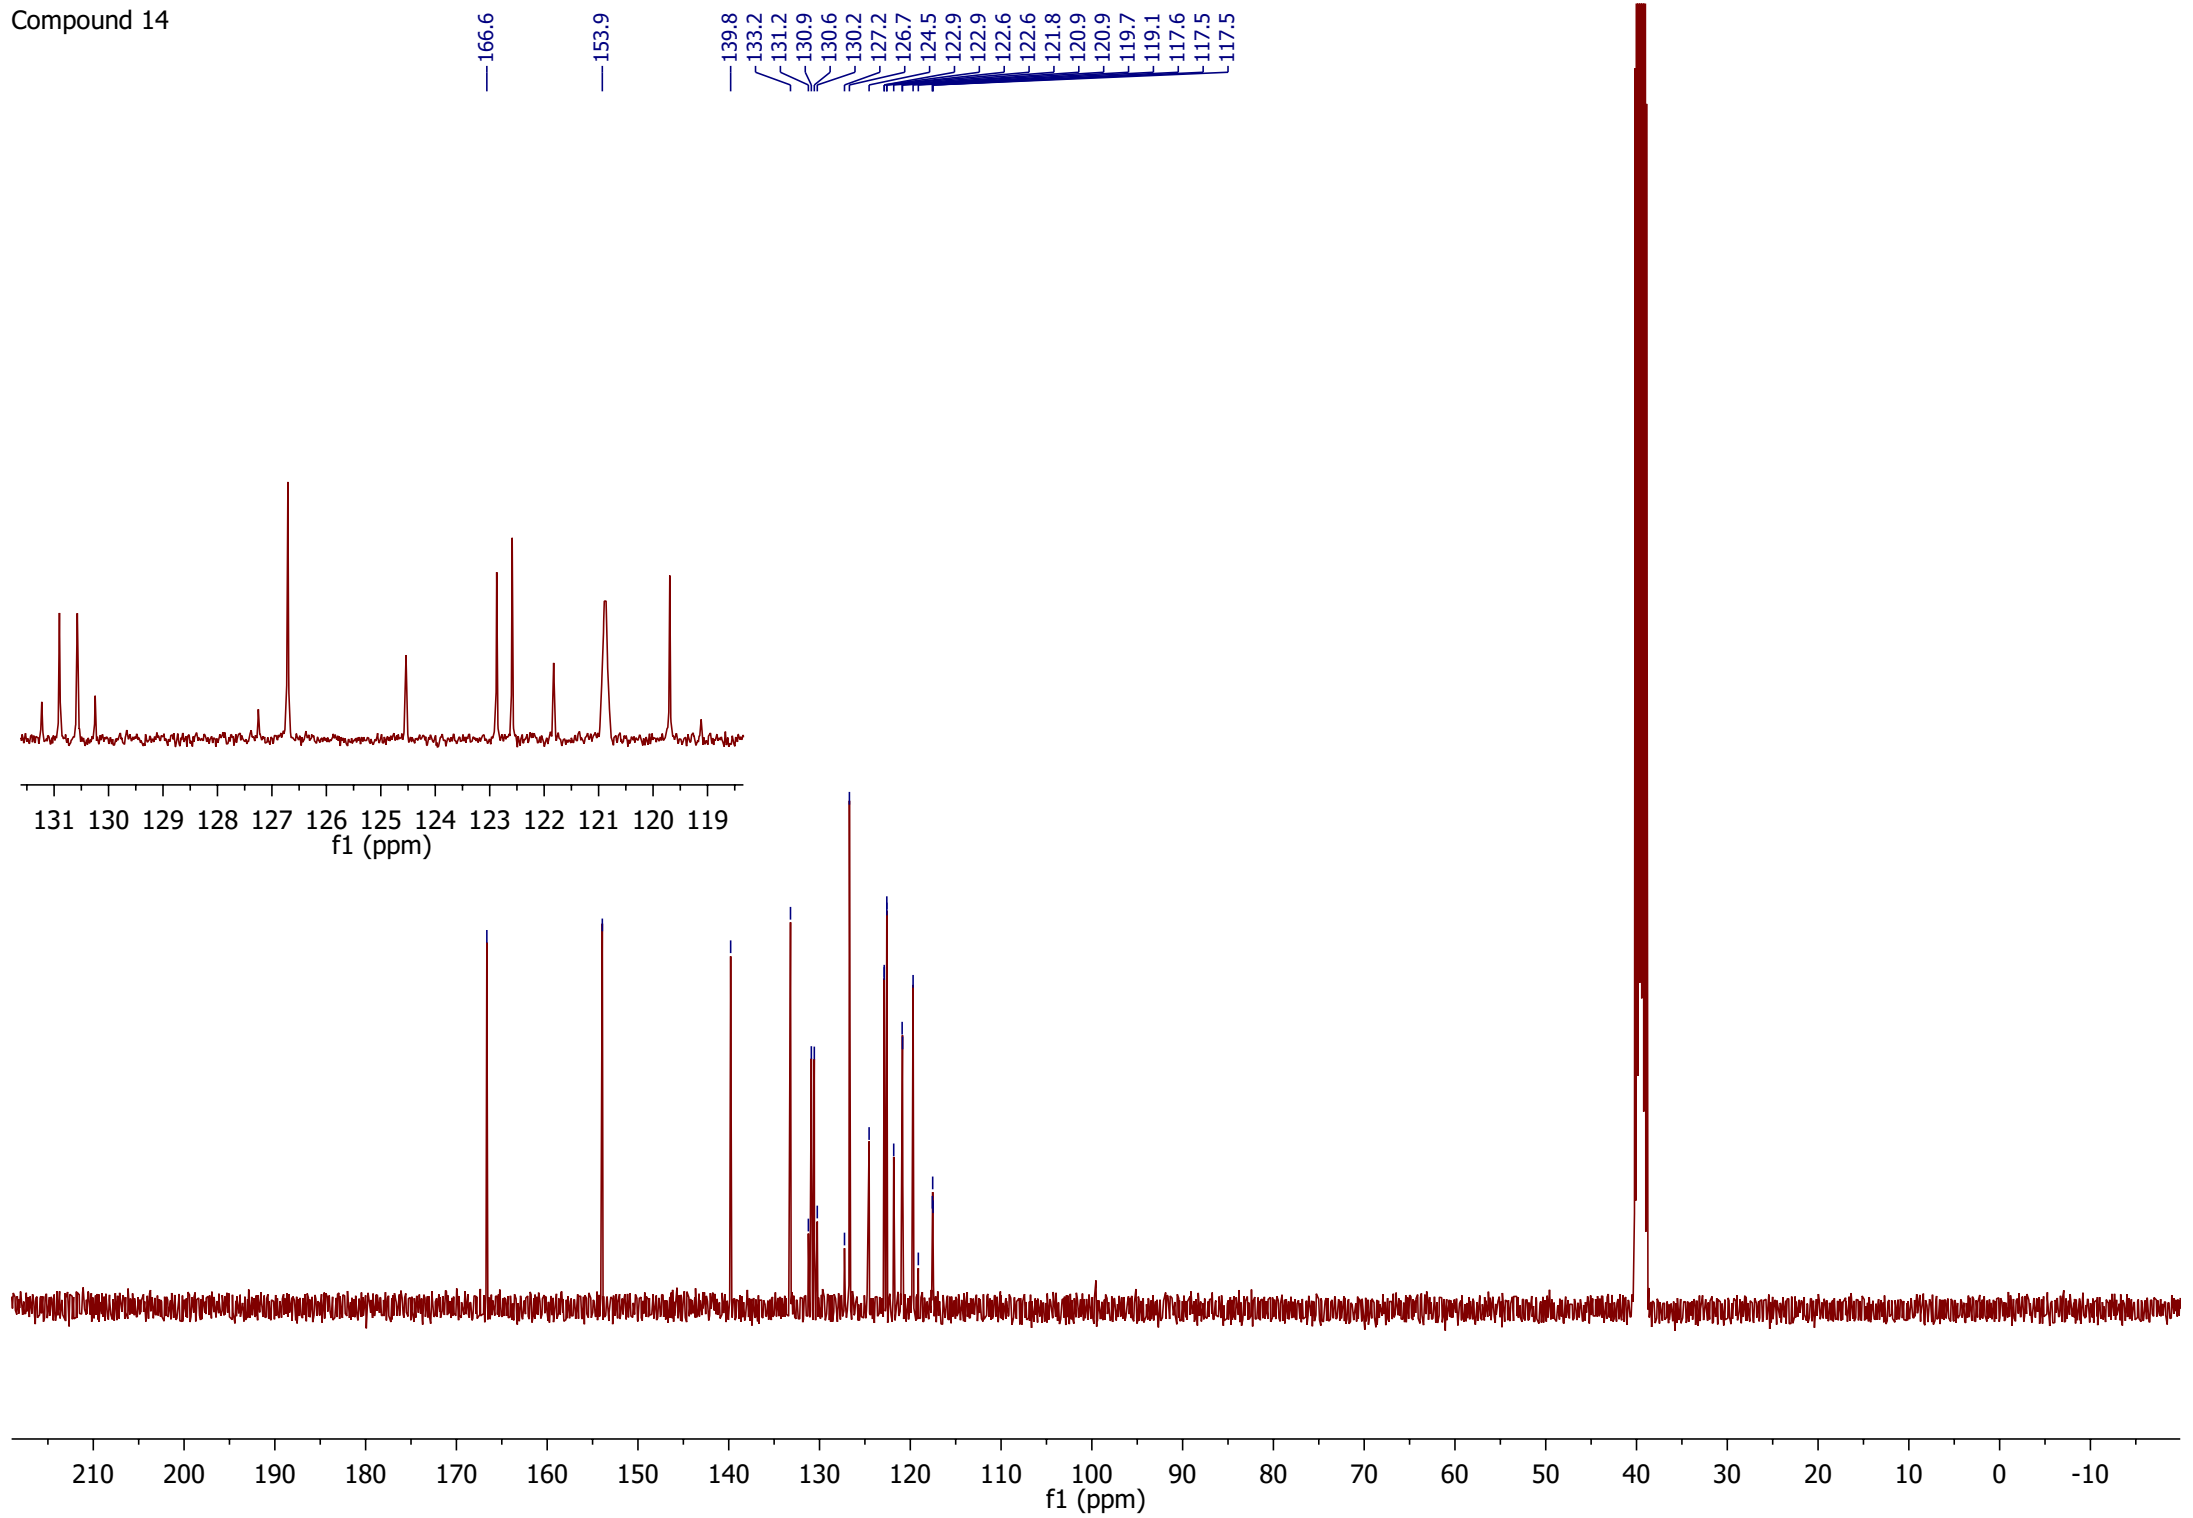

Compound 15

—11.54

—10.98

—8.45

7.93

7.91

7.85

7.32

7.32

7.30

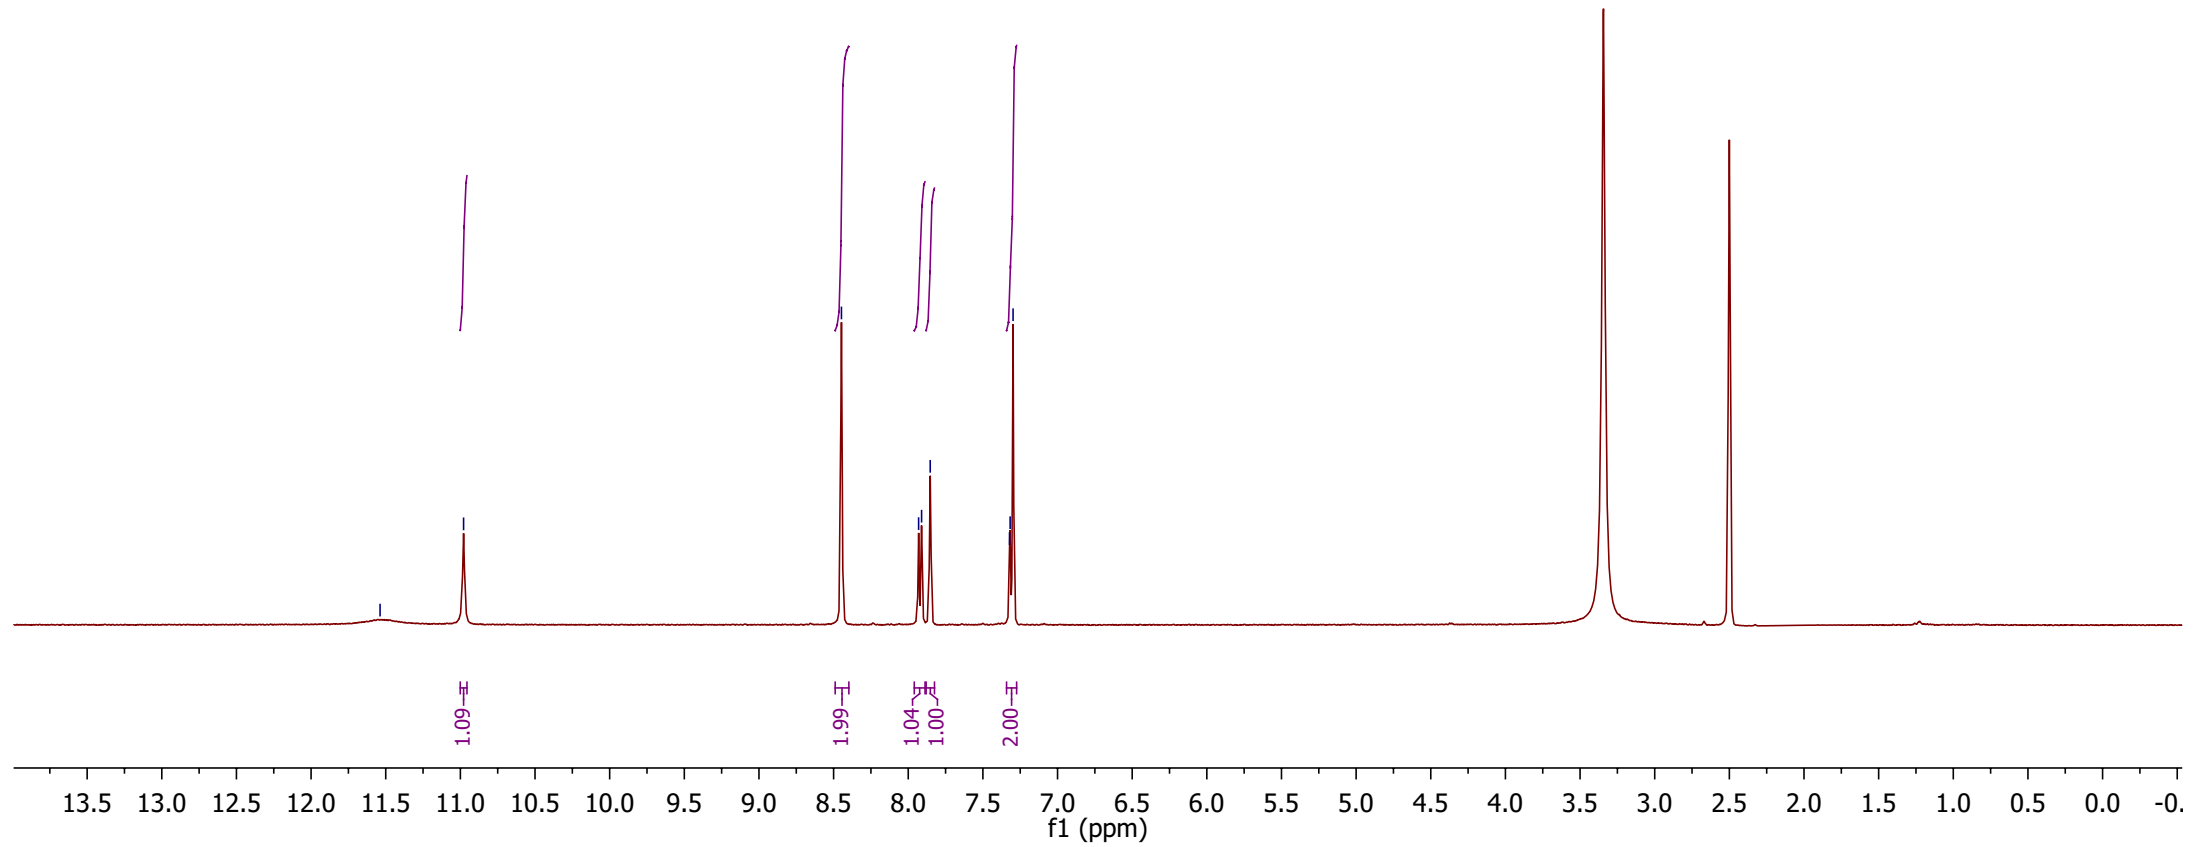

Compound 15

— 165.4

— 156.8

— 140.4

— 133.2

— 132.9

— 132.6

— 132.2

— 131.3

— 131.0

— 130.9

— 130.7

— 130.3

— 127.7

— 127.3

— 124.9

— 124.6

— 124.2

— 122.2

— 121.9

— 120.0

— 120.0

— 119.5

— 119.2

— 116.9

— 115.5

— 115.4

— 115.4

— 113.4

— 113.4

— 113.3

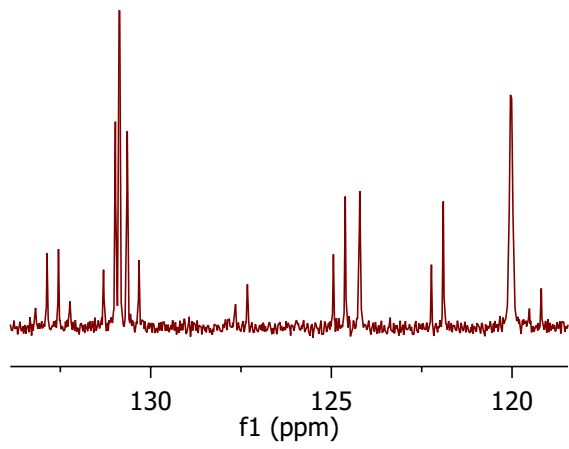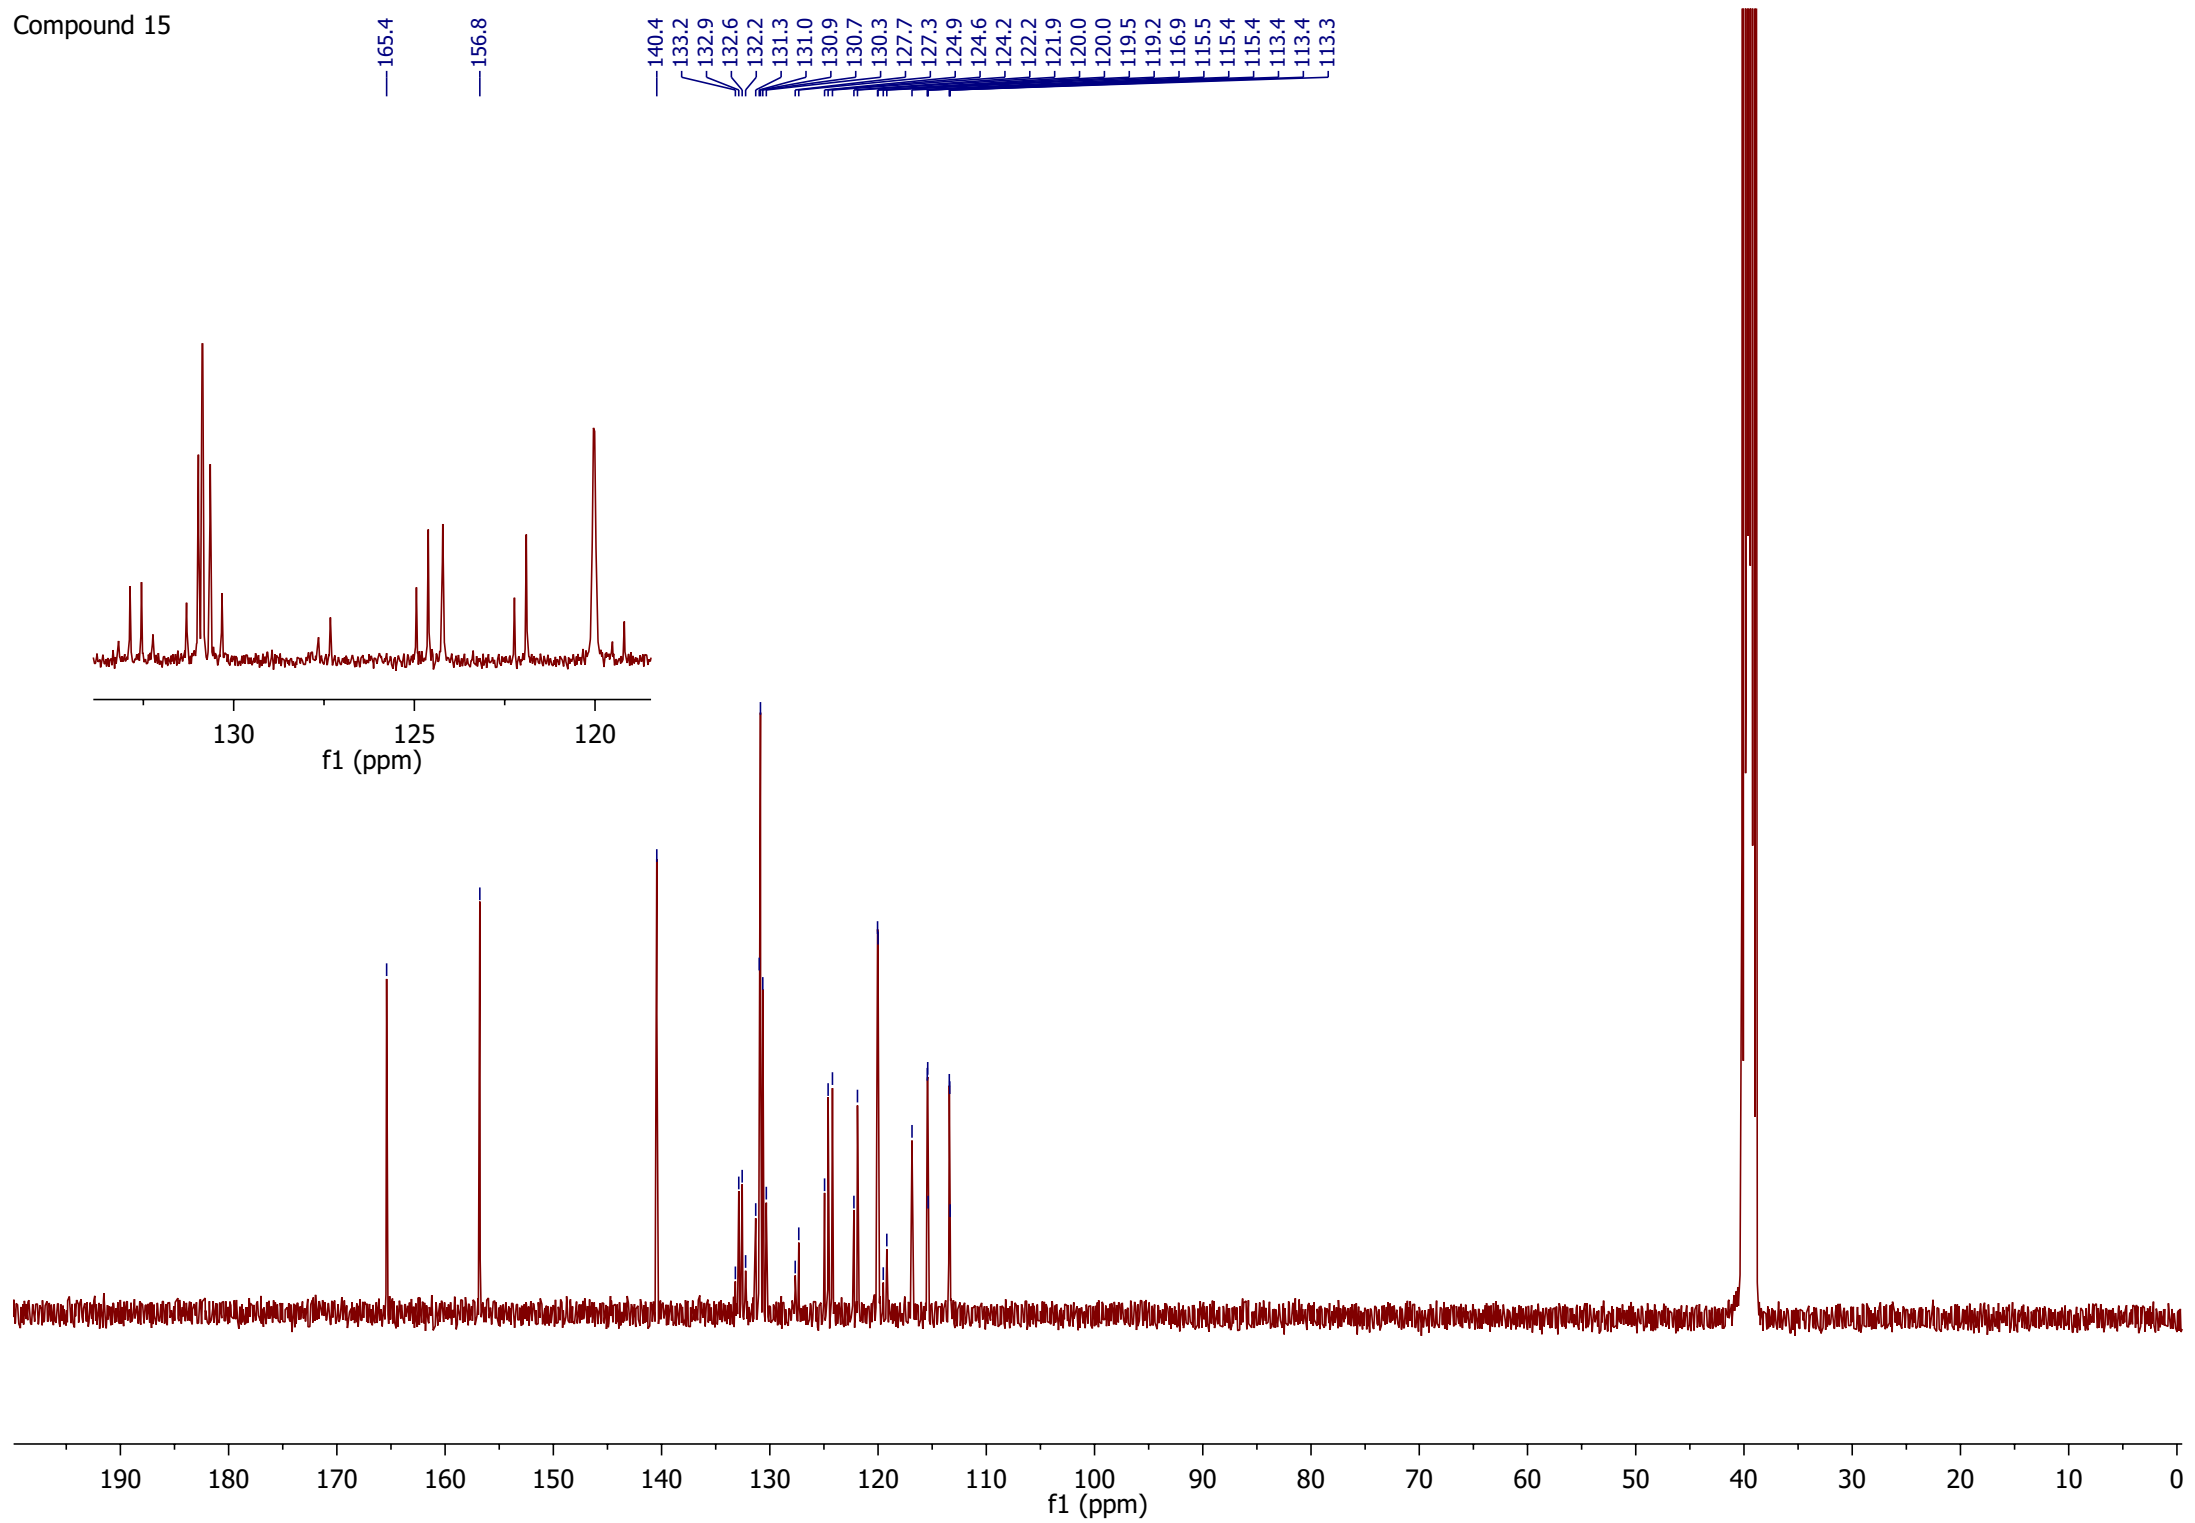

Compound 16

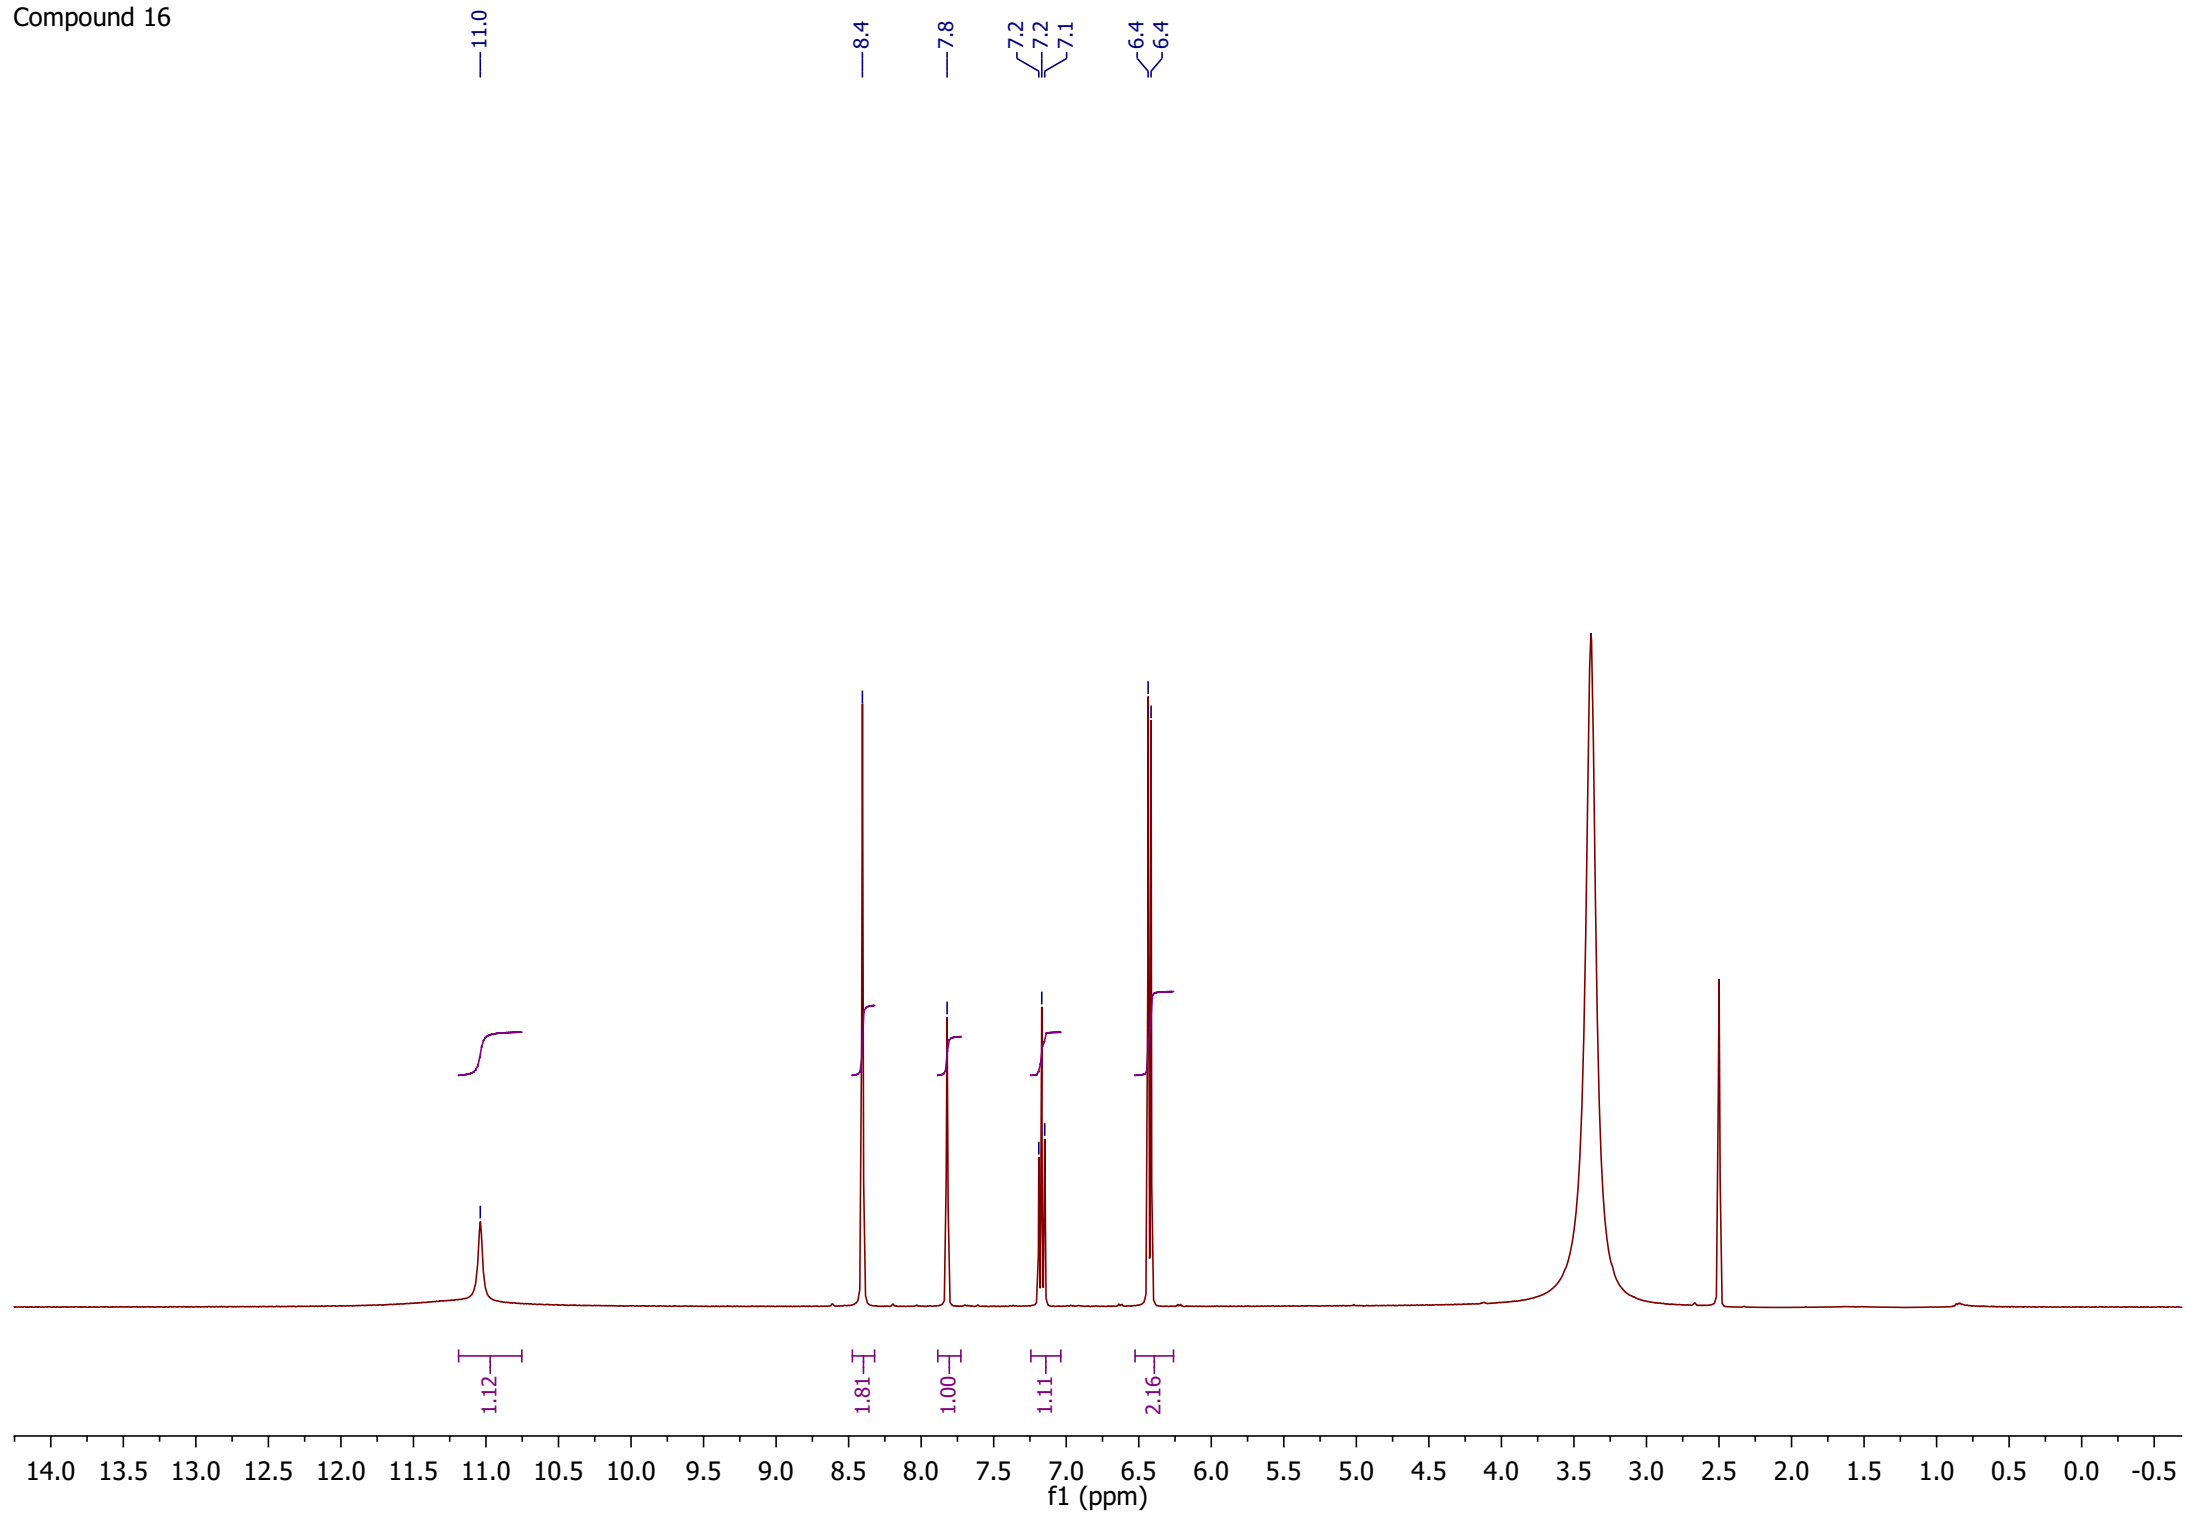

Compound 16

— 167.8

— 158.3

— 140.3

— 132.9

— 131.3

— 130.9

— 130.6

— 130.3

— 127.3

— 124.6

— 121.9

— 120.4

— 120.4

— 119.2

— 116.8

— 116.8

— 116.8

— 116.7

— 107.5

— 107.1

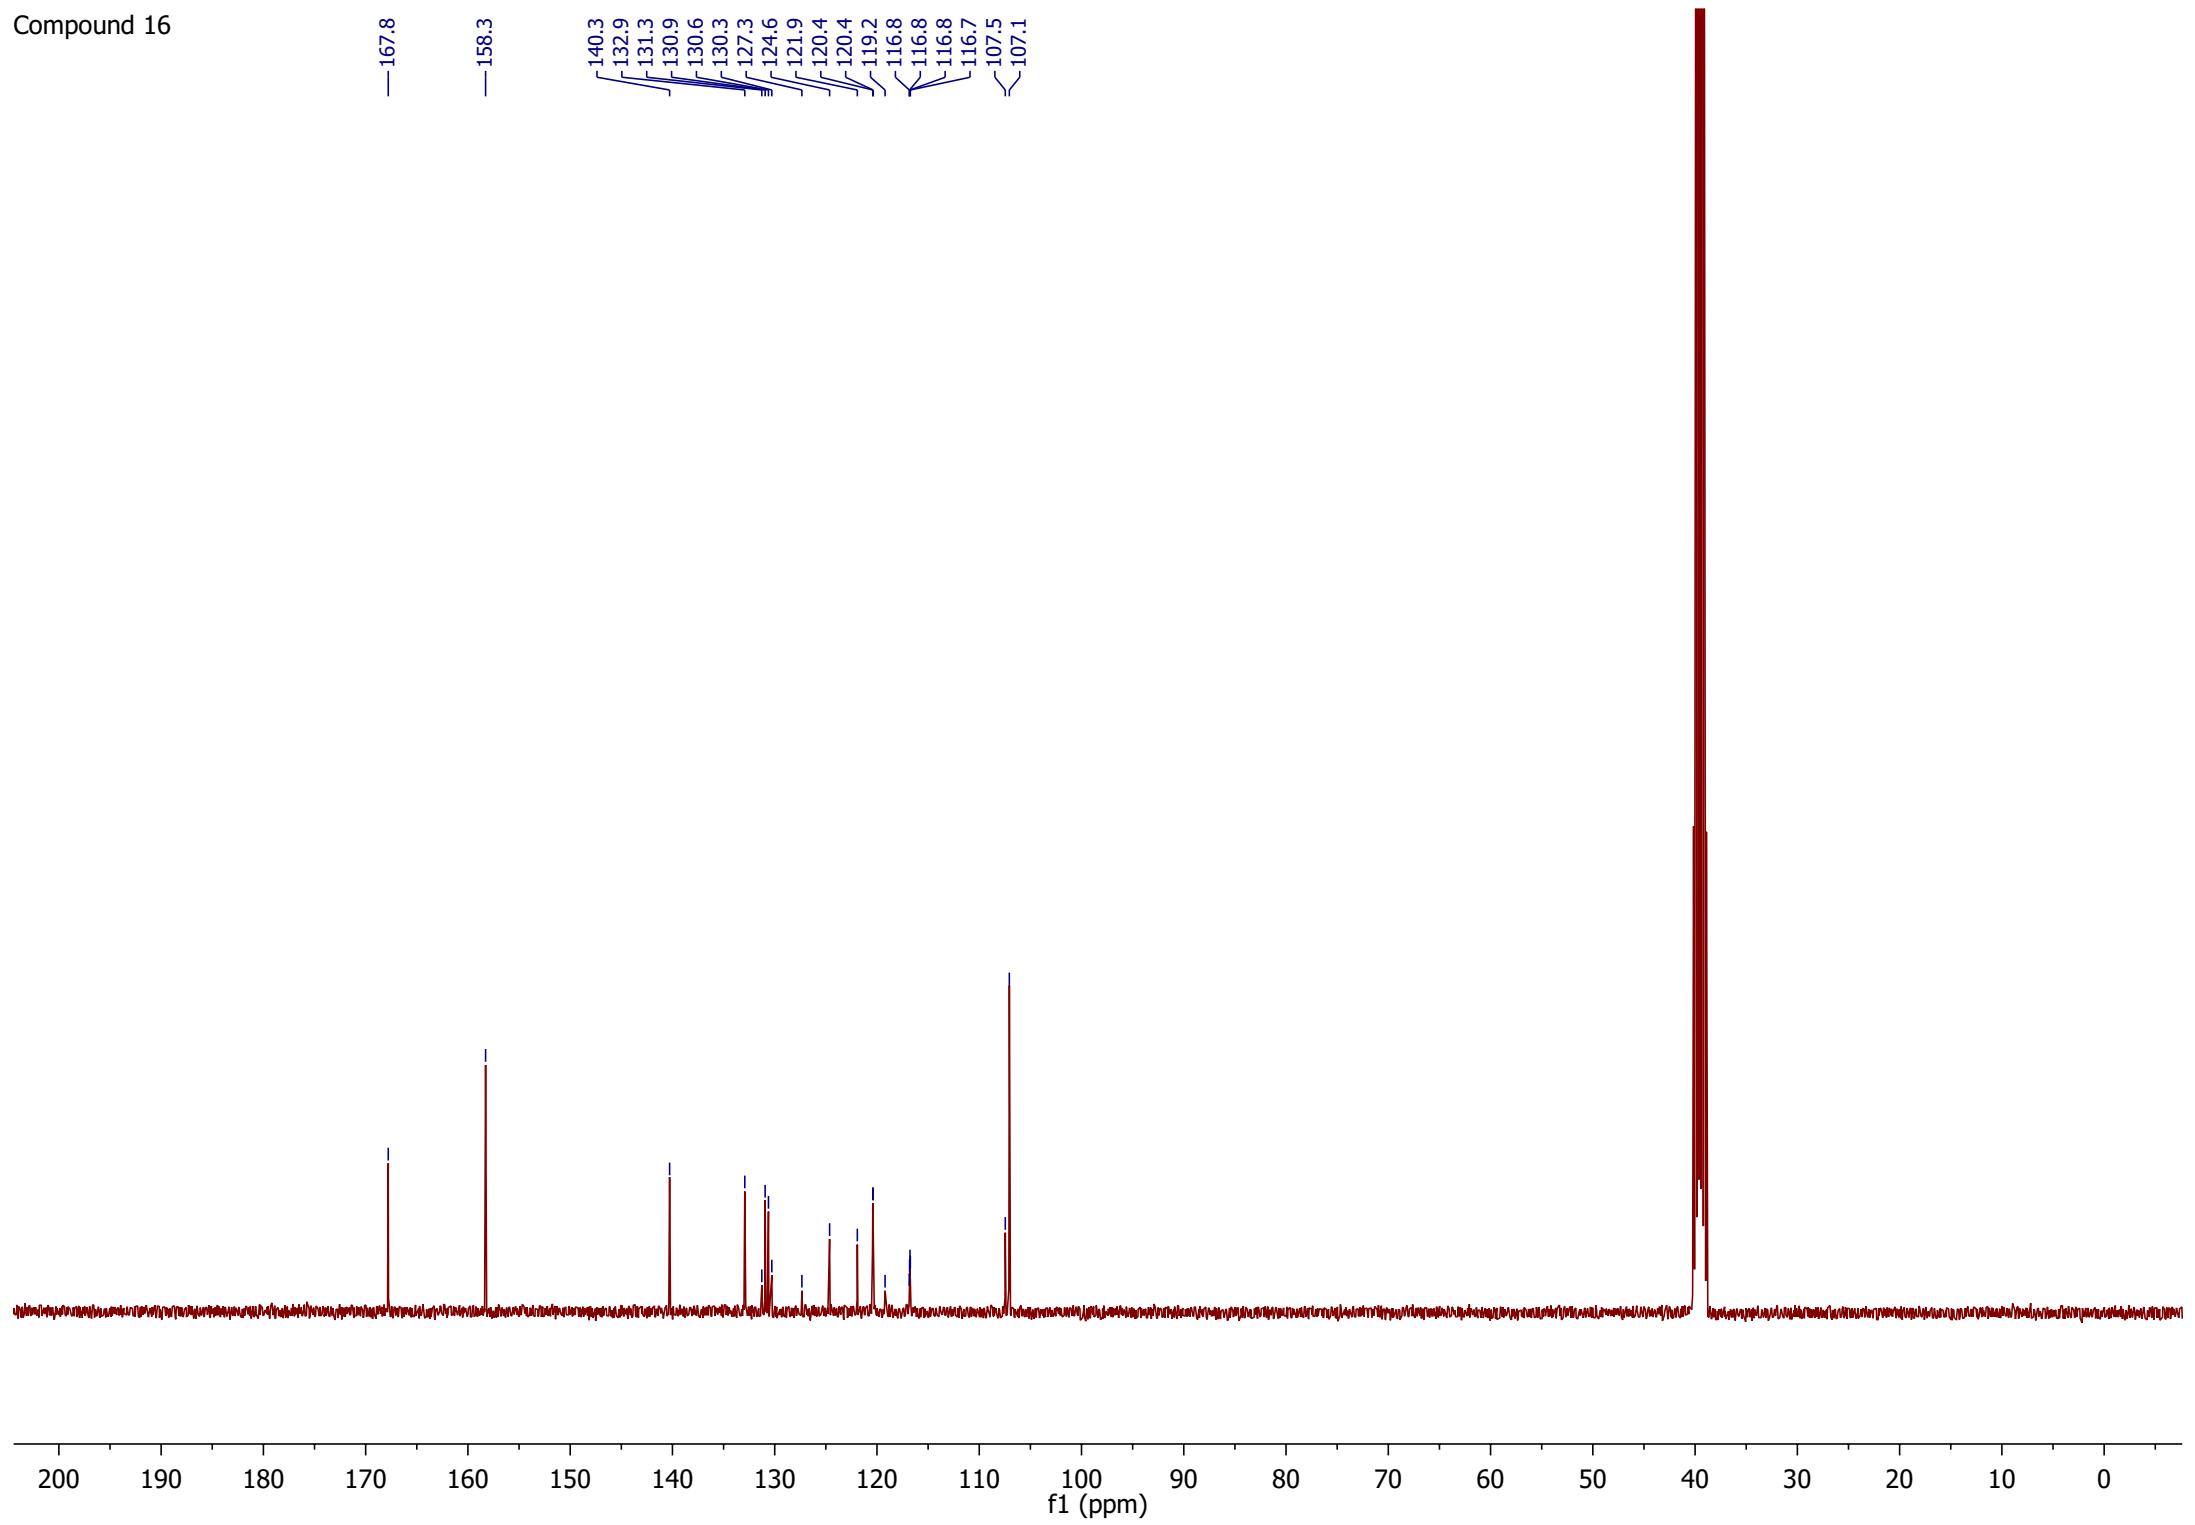

Compound 17

12.4

11.1  
11.1

8.7  
8.7  
8.0  
8.0  
8.0  
7.8  
7.7  
7.5  
7.5  
7.5  
7.1  
7.1

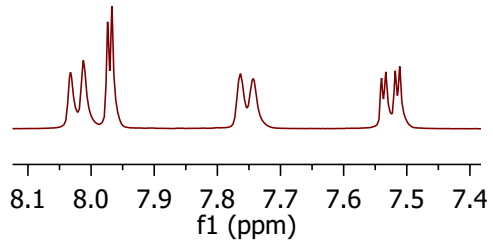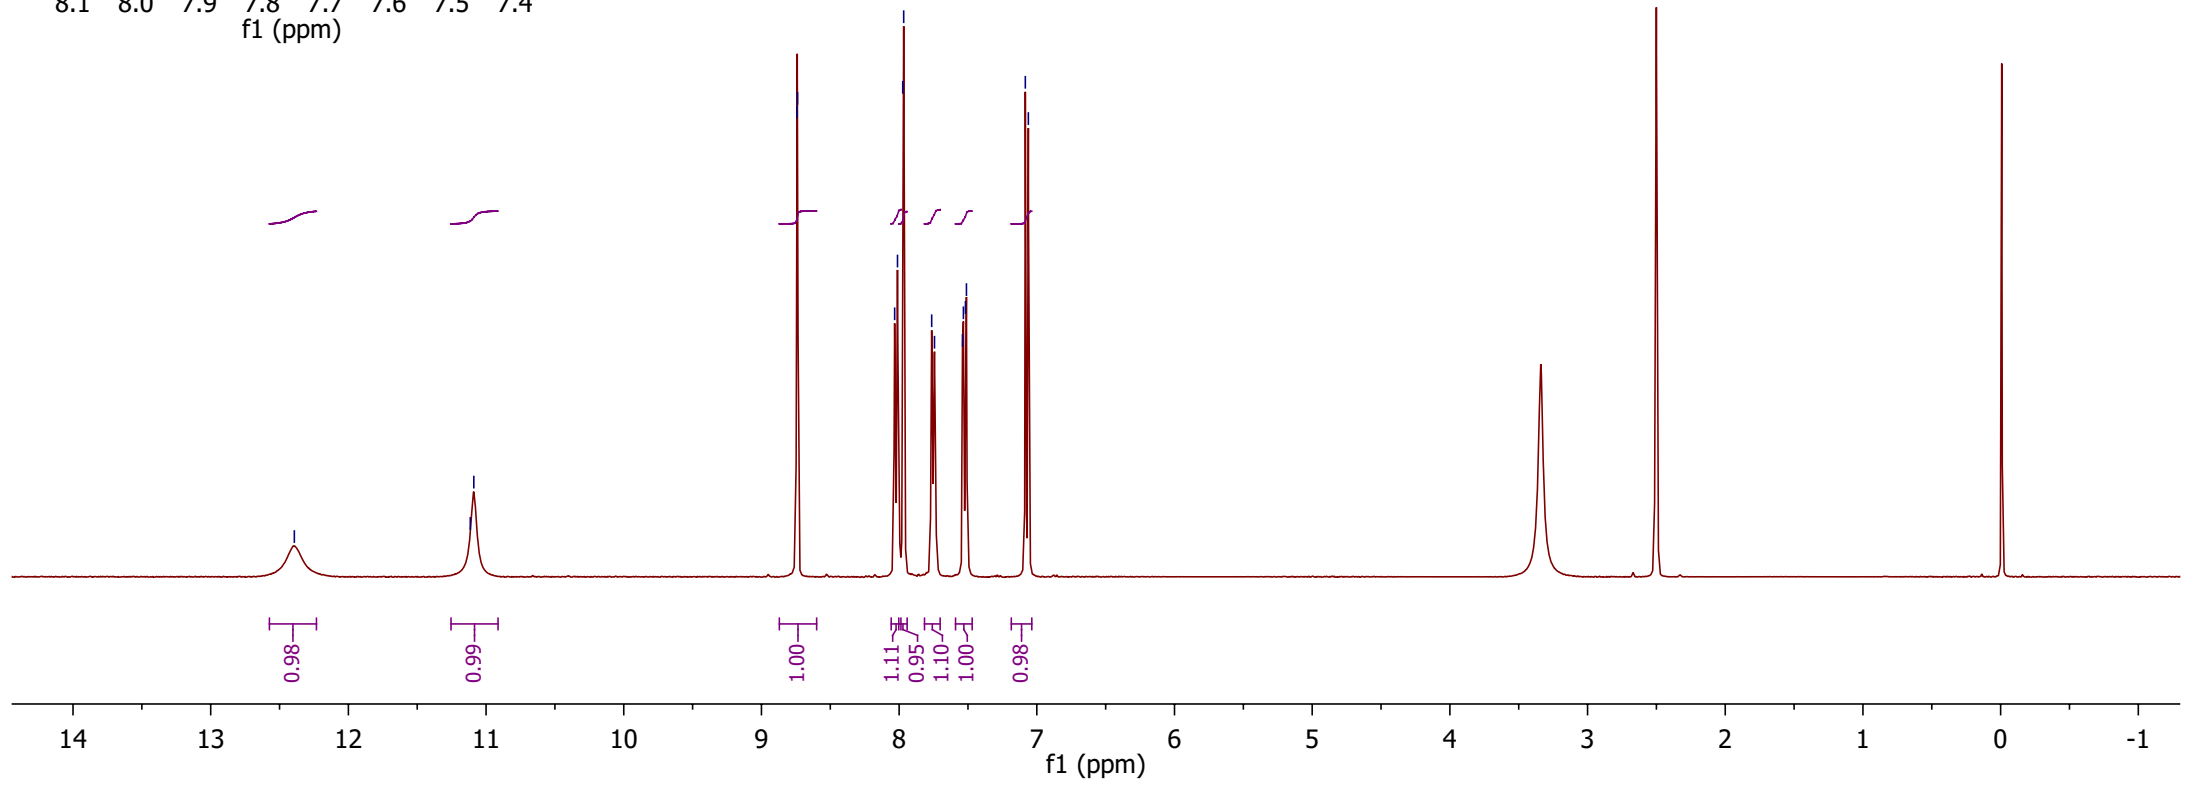

Compound 17

163.2  
163.2  
155.6  
136.4  
133.9  
133.4  
133.1  
132.8  
129.9  
127.9  
127.9  
124.6  
124.5  
123.5  
121.9  
121.8  
121.6  
121.5  
121.5  
121.4  
119.1  
119.1

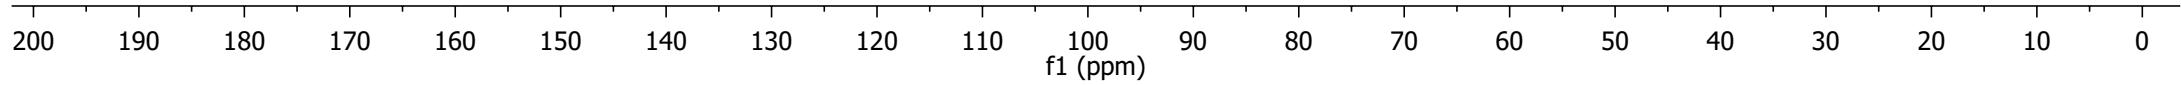

Compound 18

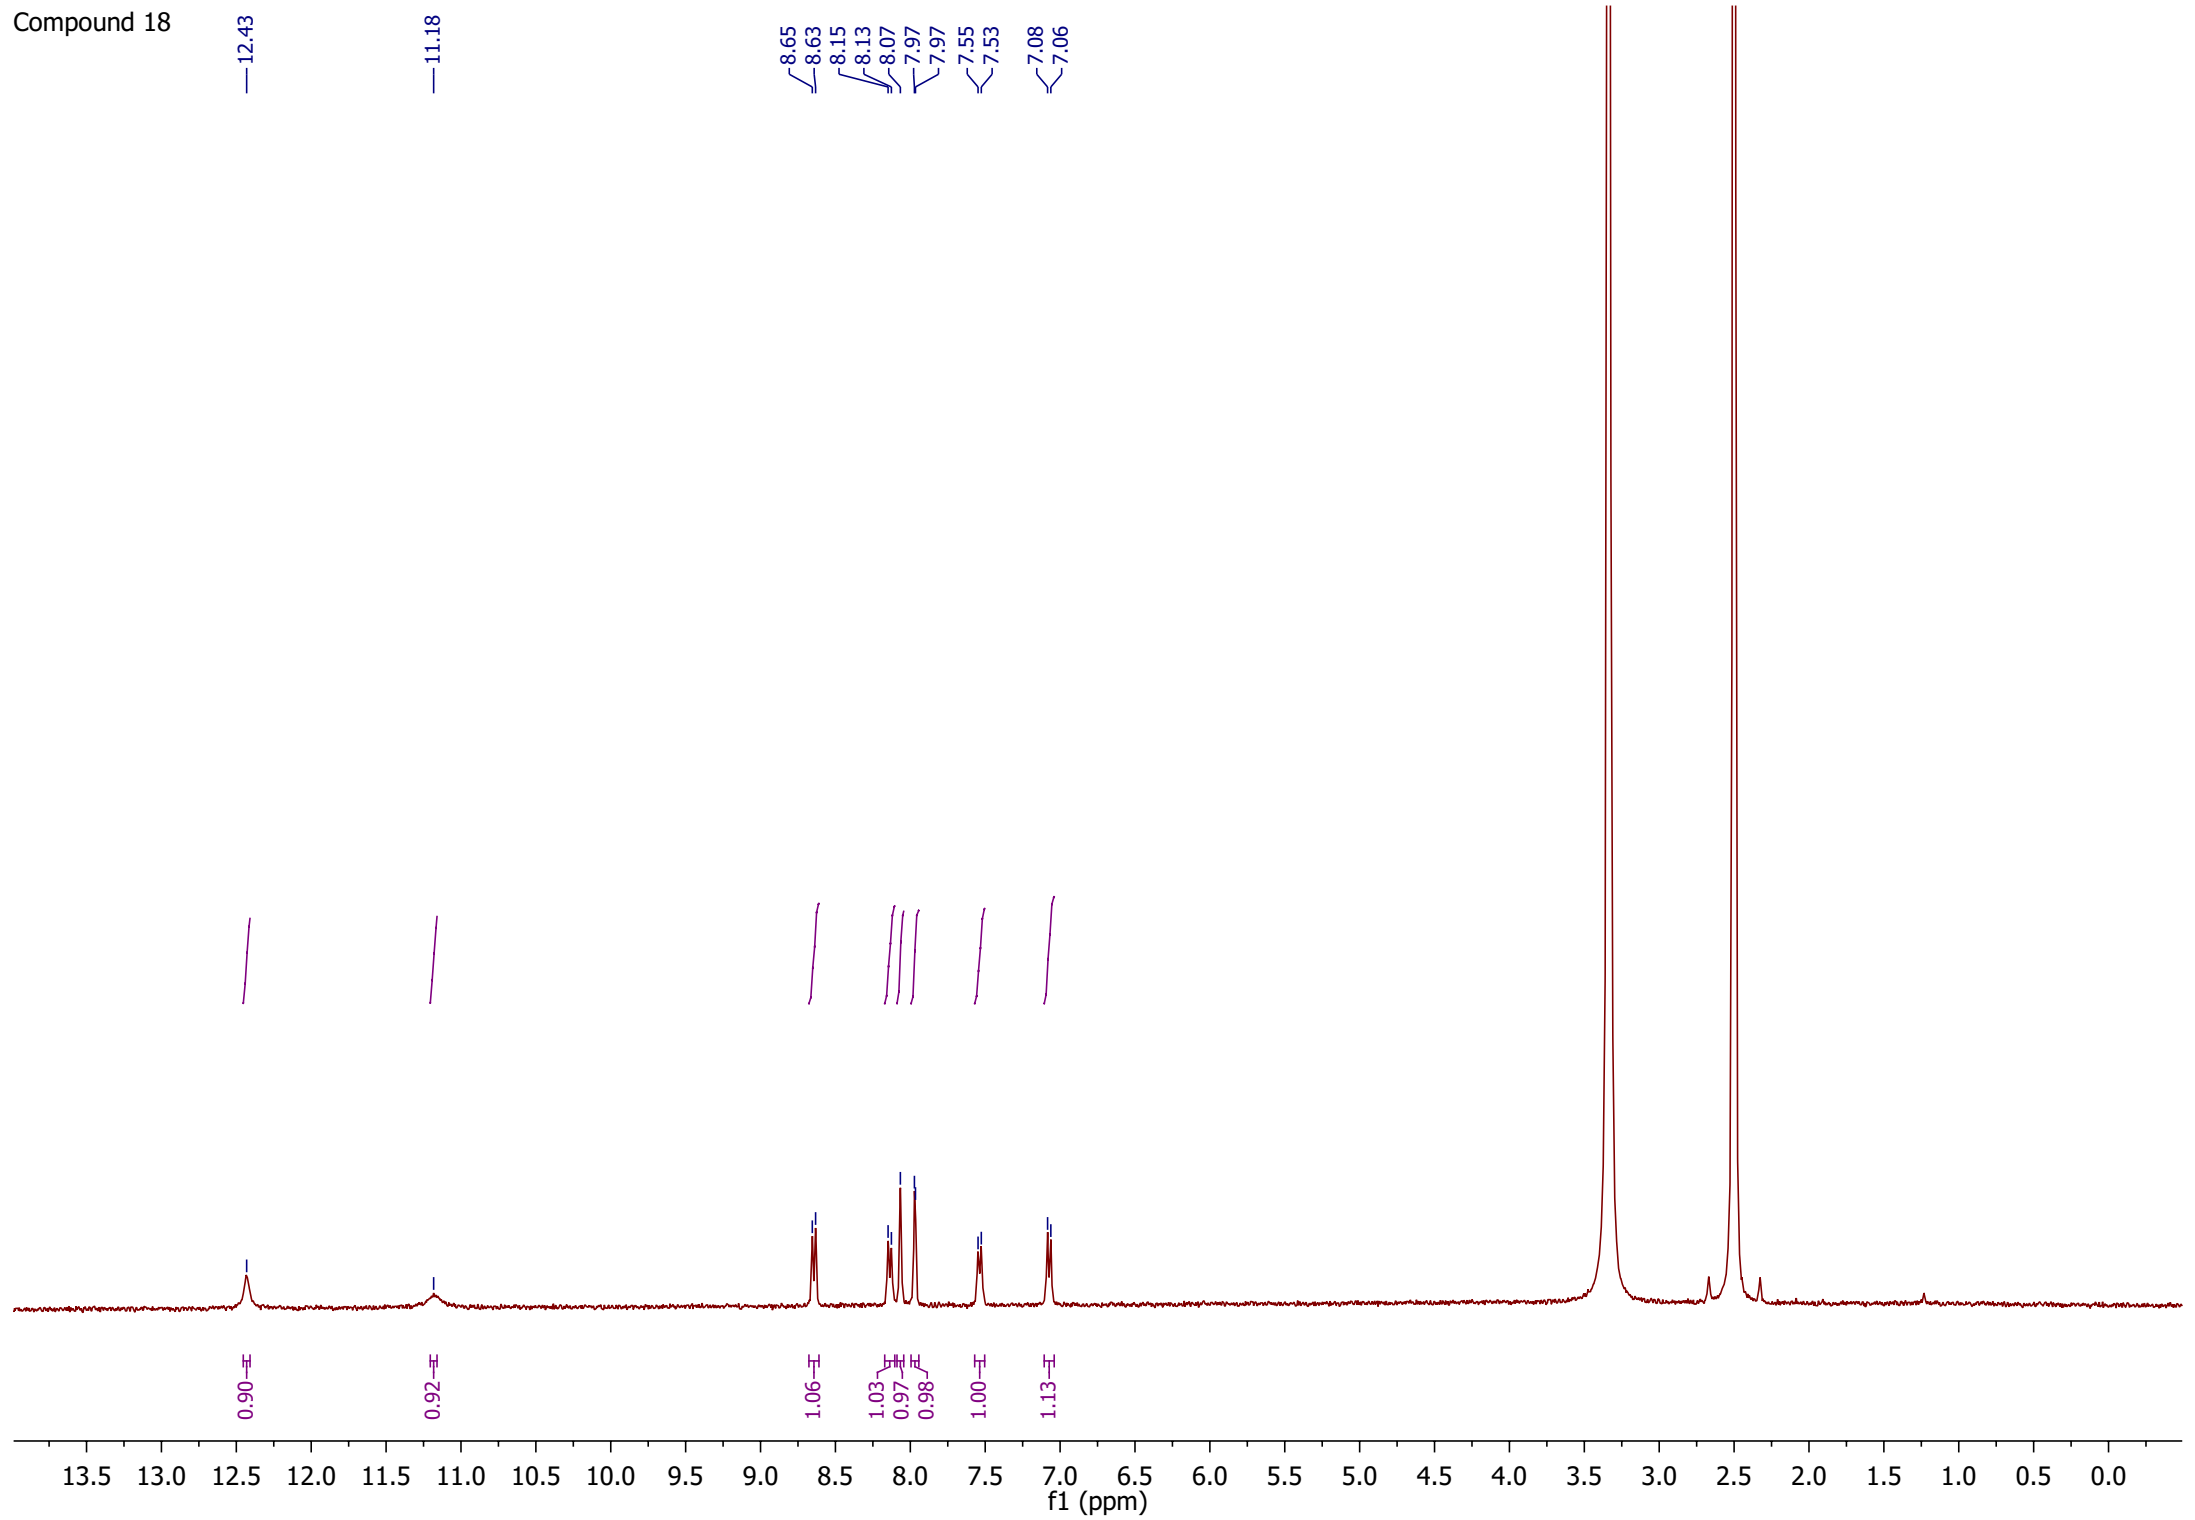



Compound 18

162.9  
155.4  
139.2  
134.0  
130.6  
130.6  
130.5  
130.1  
127.5  
127.2  
125.2  
125.1  
124.9  
124.8  
124.5  
124.5  
124.2  
123.7  
123.5  
123.5  
123.4  
122.1  
121.8  
120.1  
119.8  
119.5  
119.4  
119.2  
119.1  
119.1

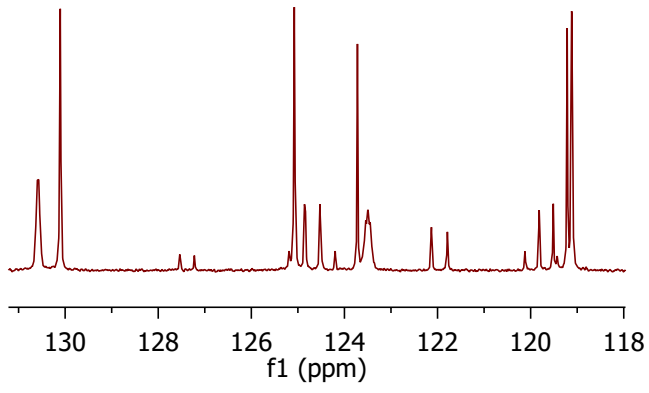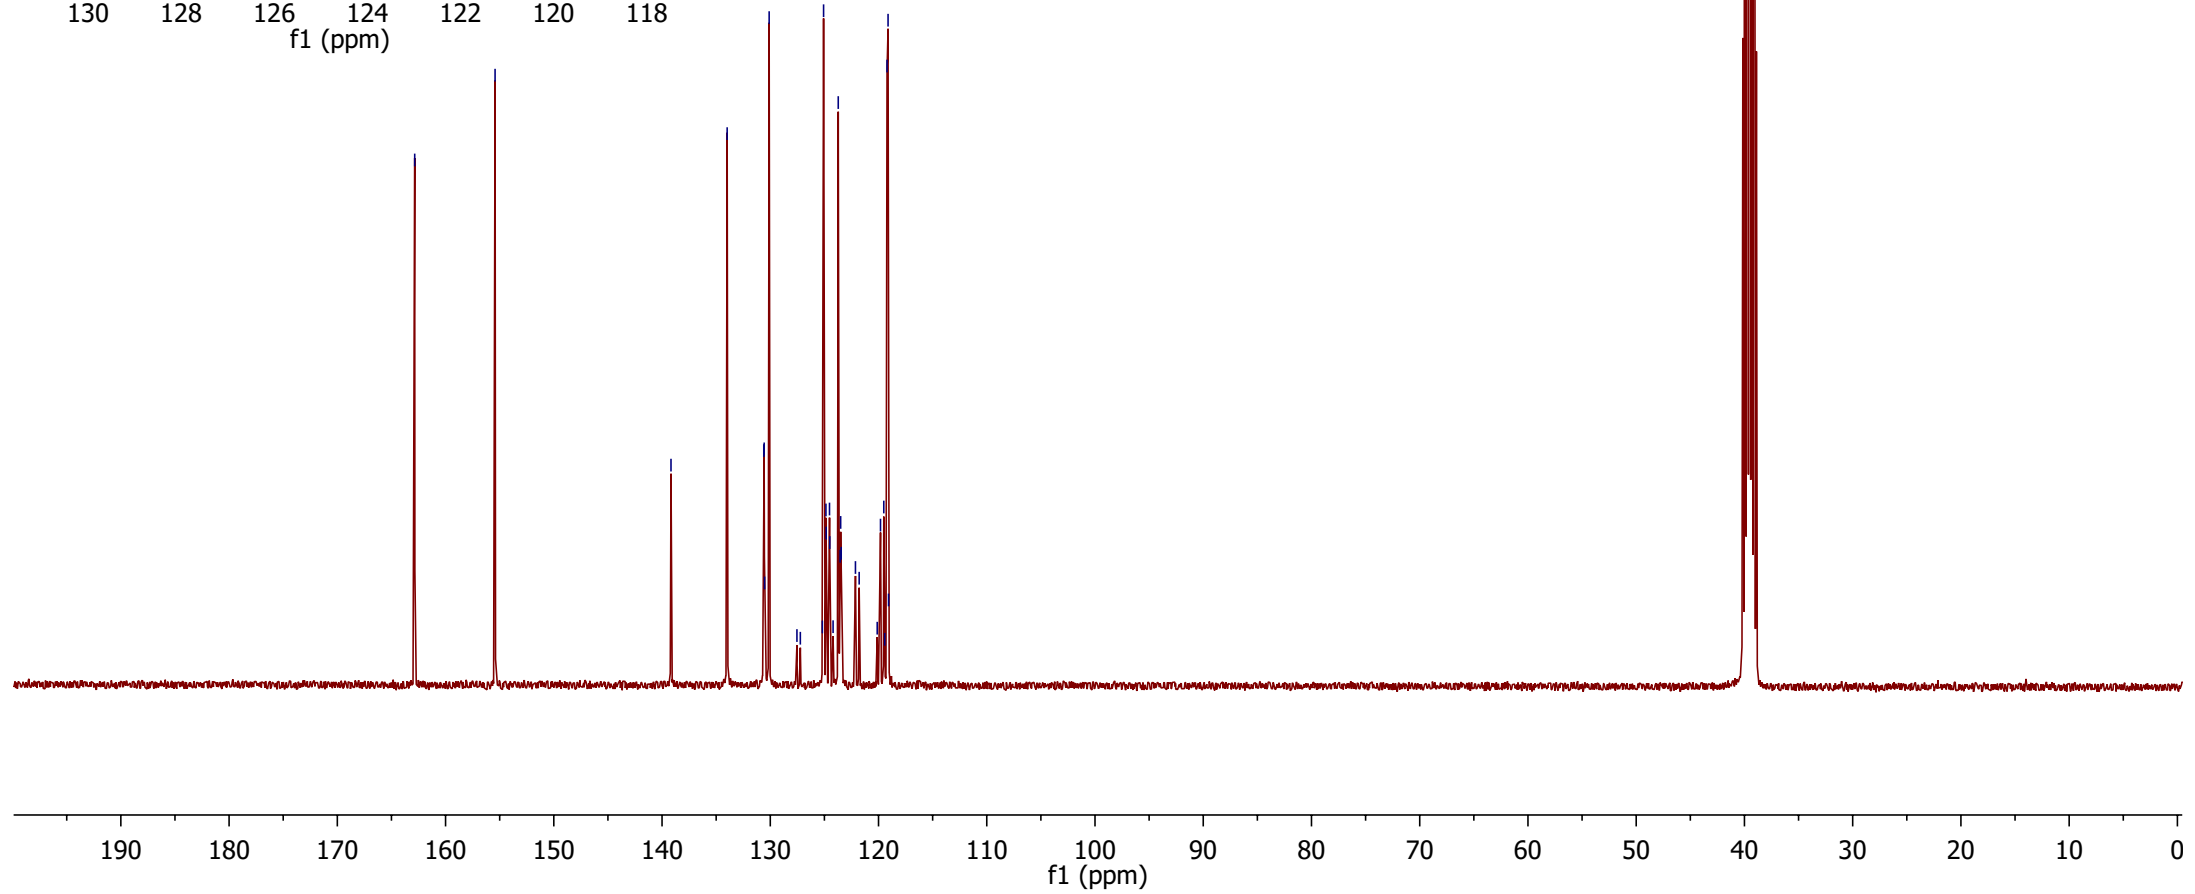

Compound 19

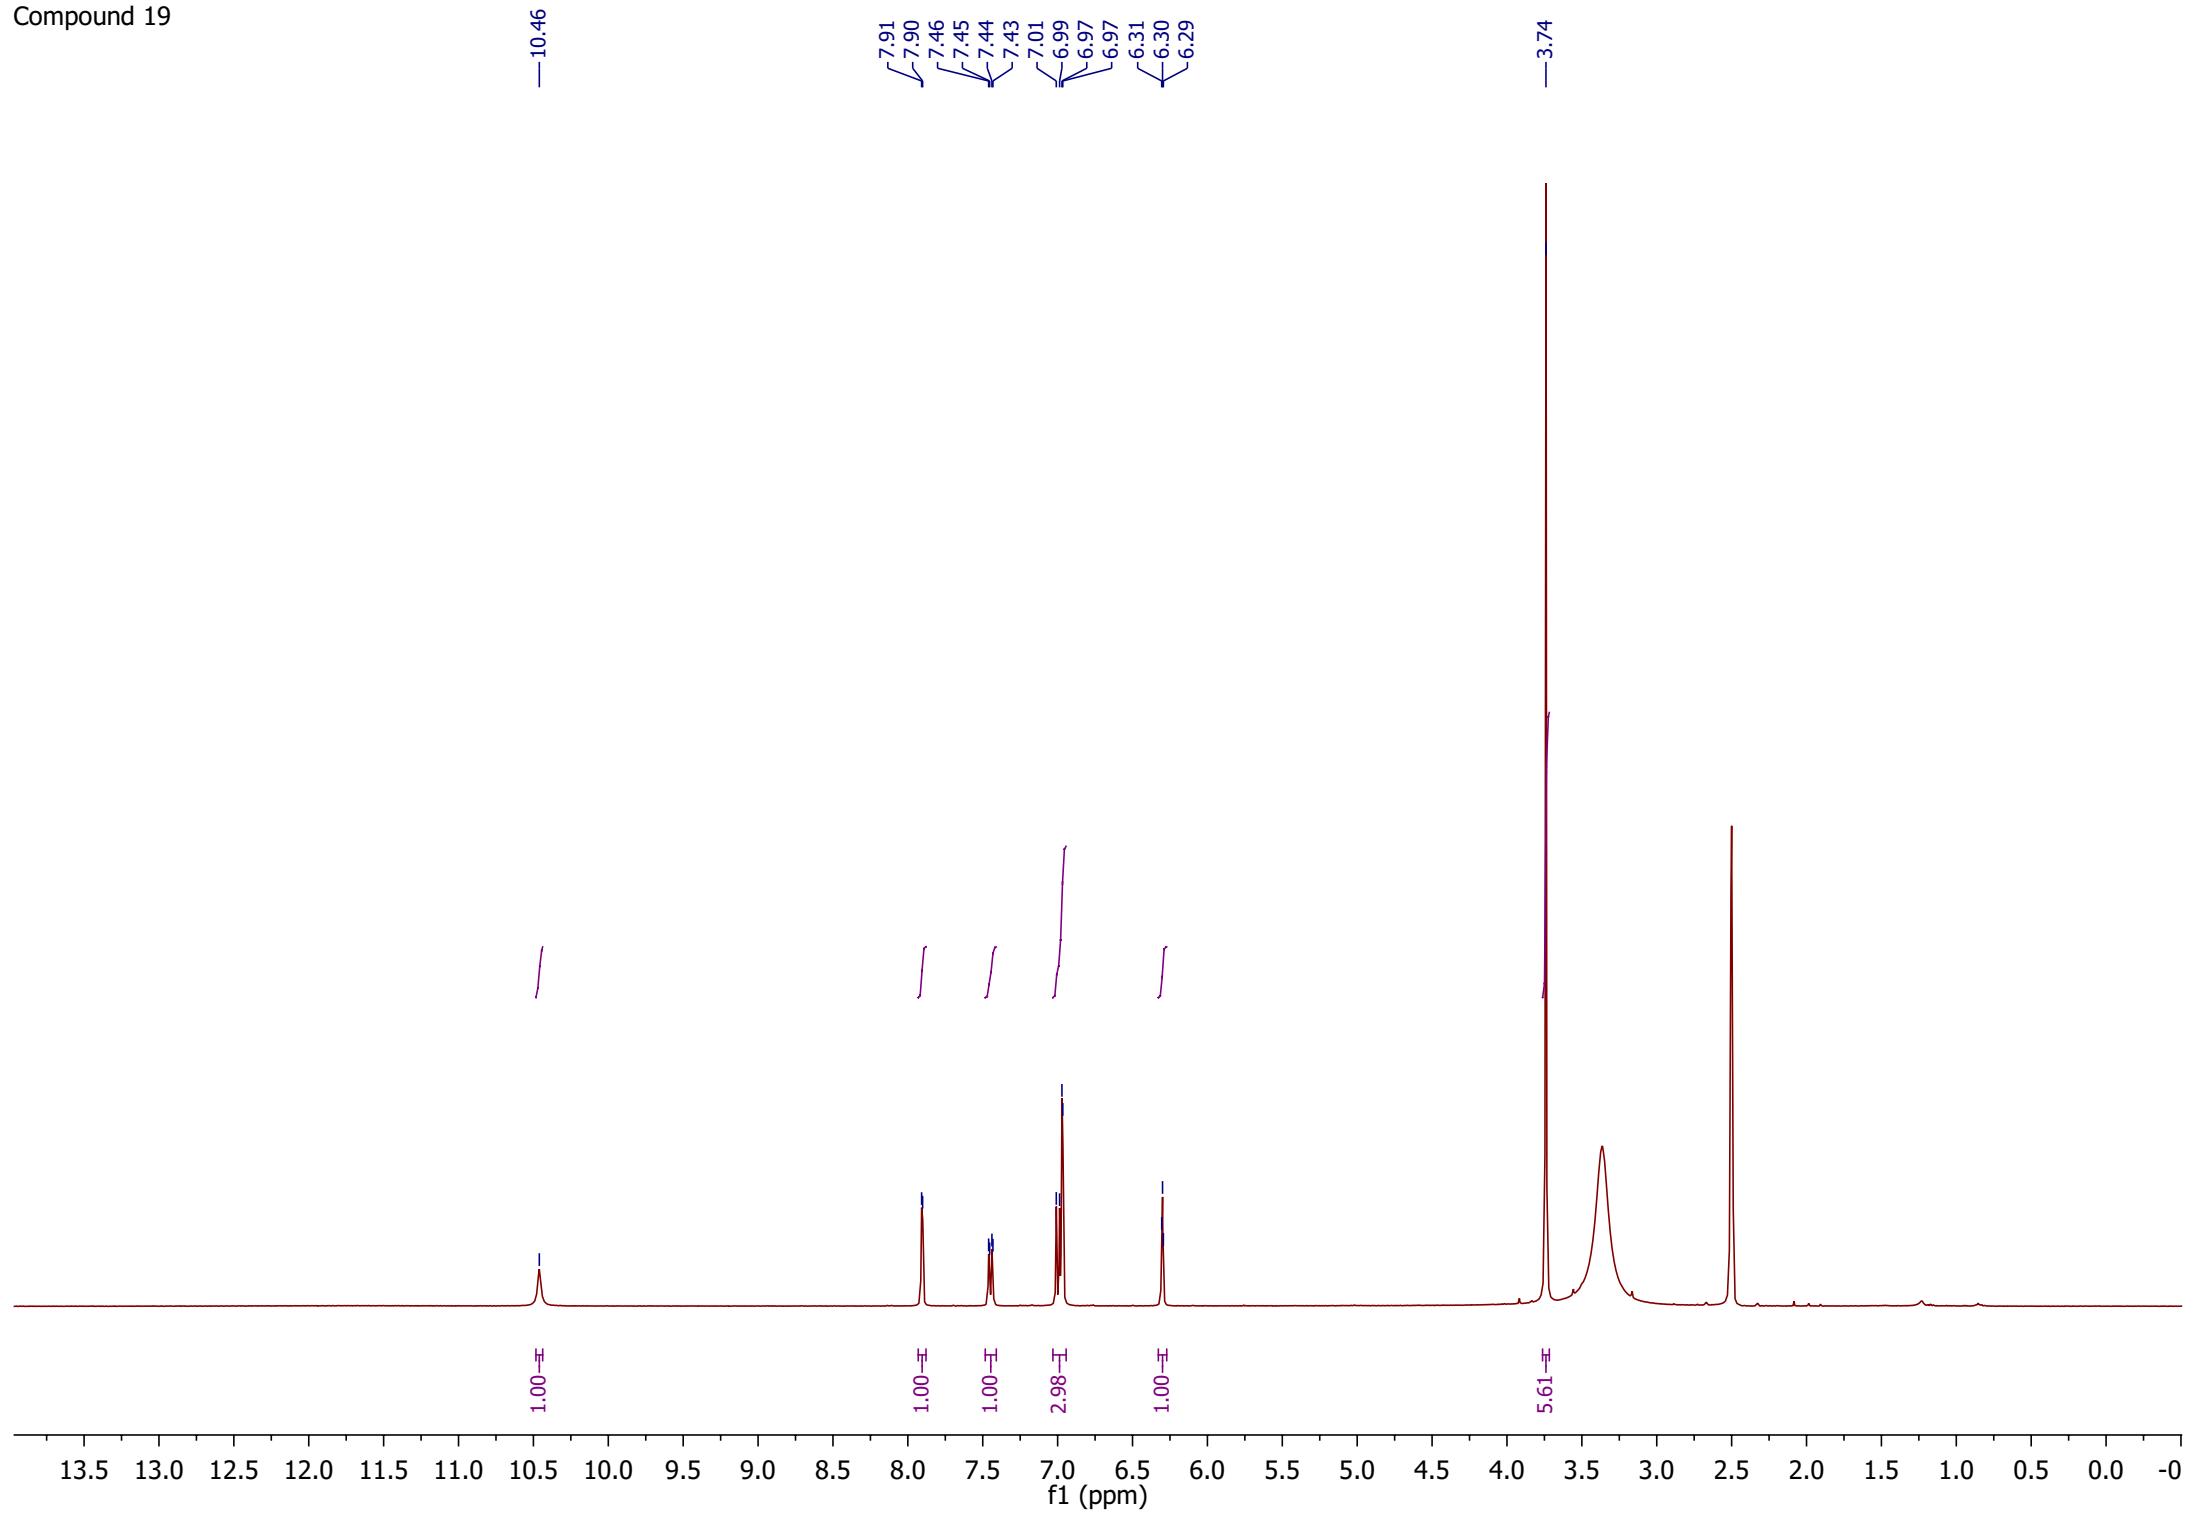

Compound 19

164.9  
160.5  
157.0

139.8

133.0

128.5

122.5

119.9

119.2

98.9

96.3

55.2

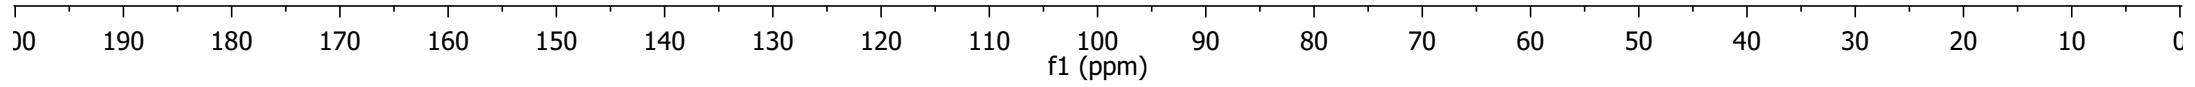

Compound 21

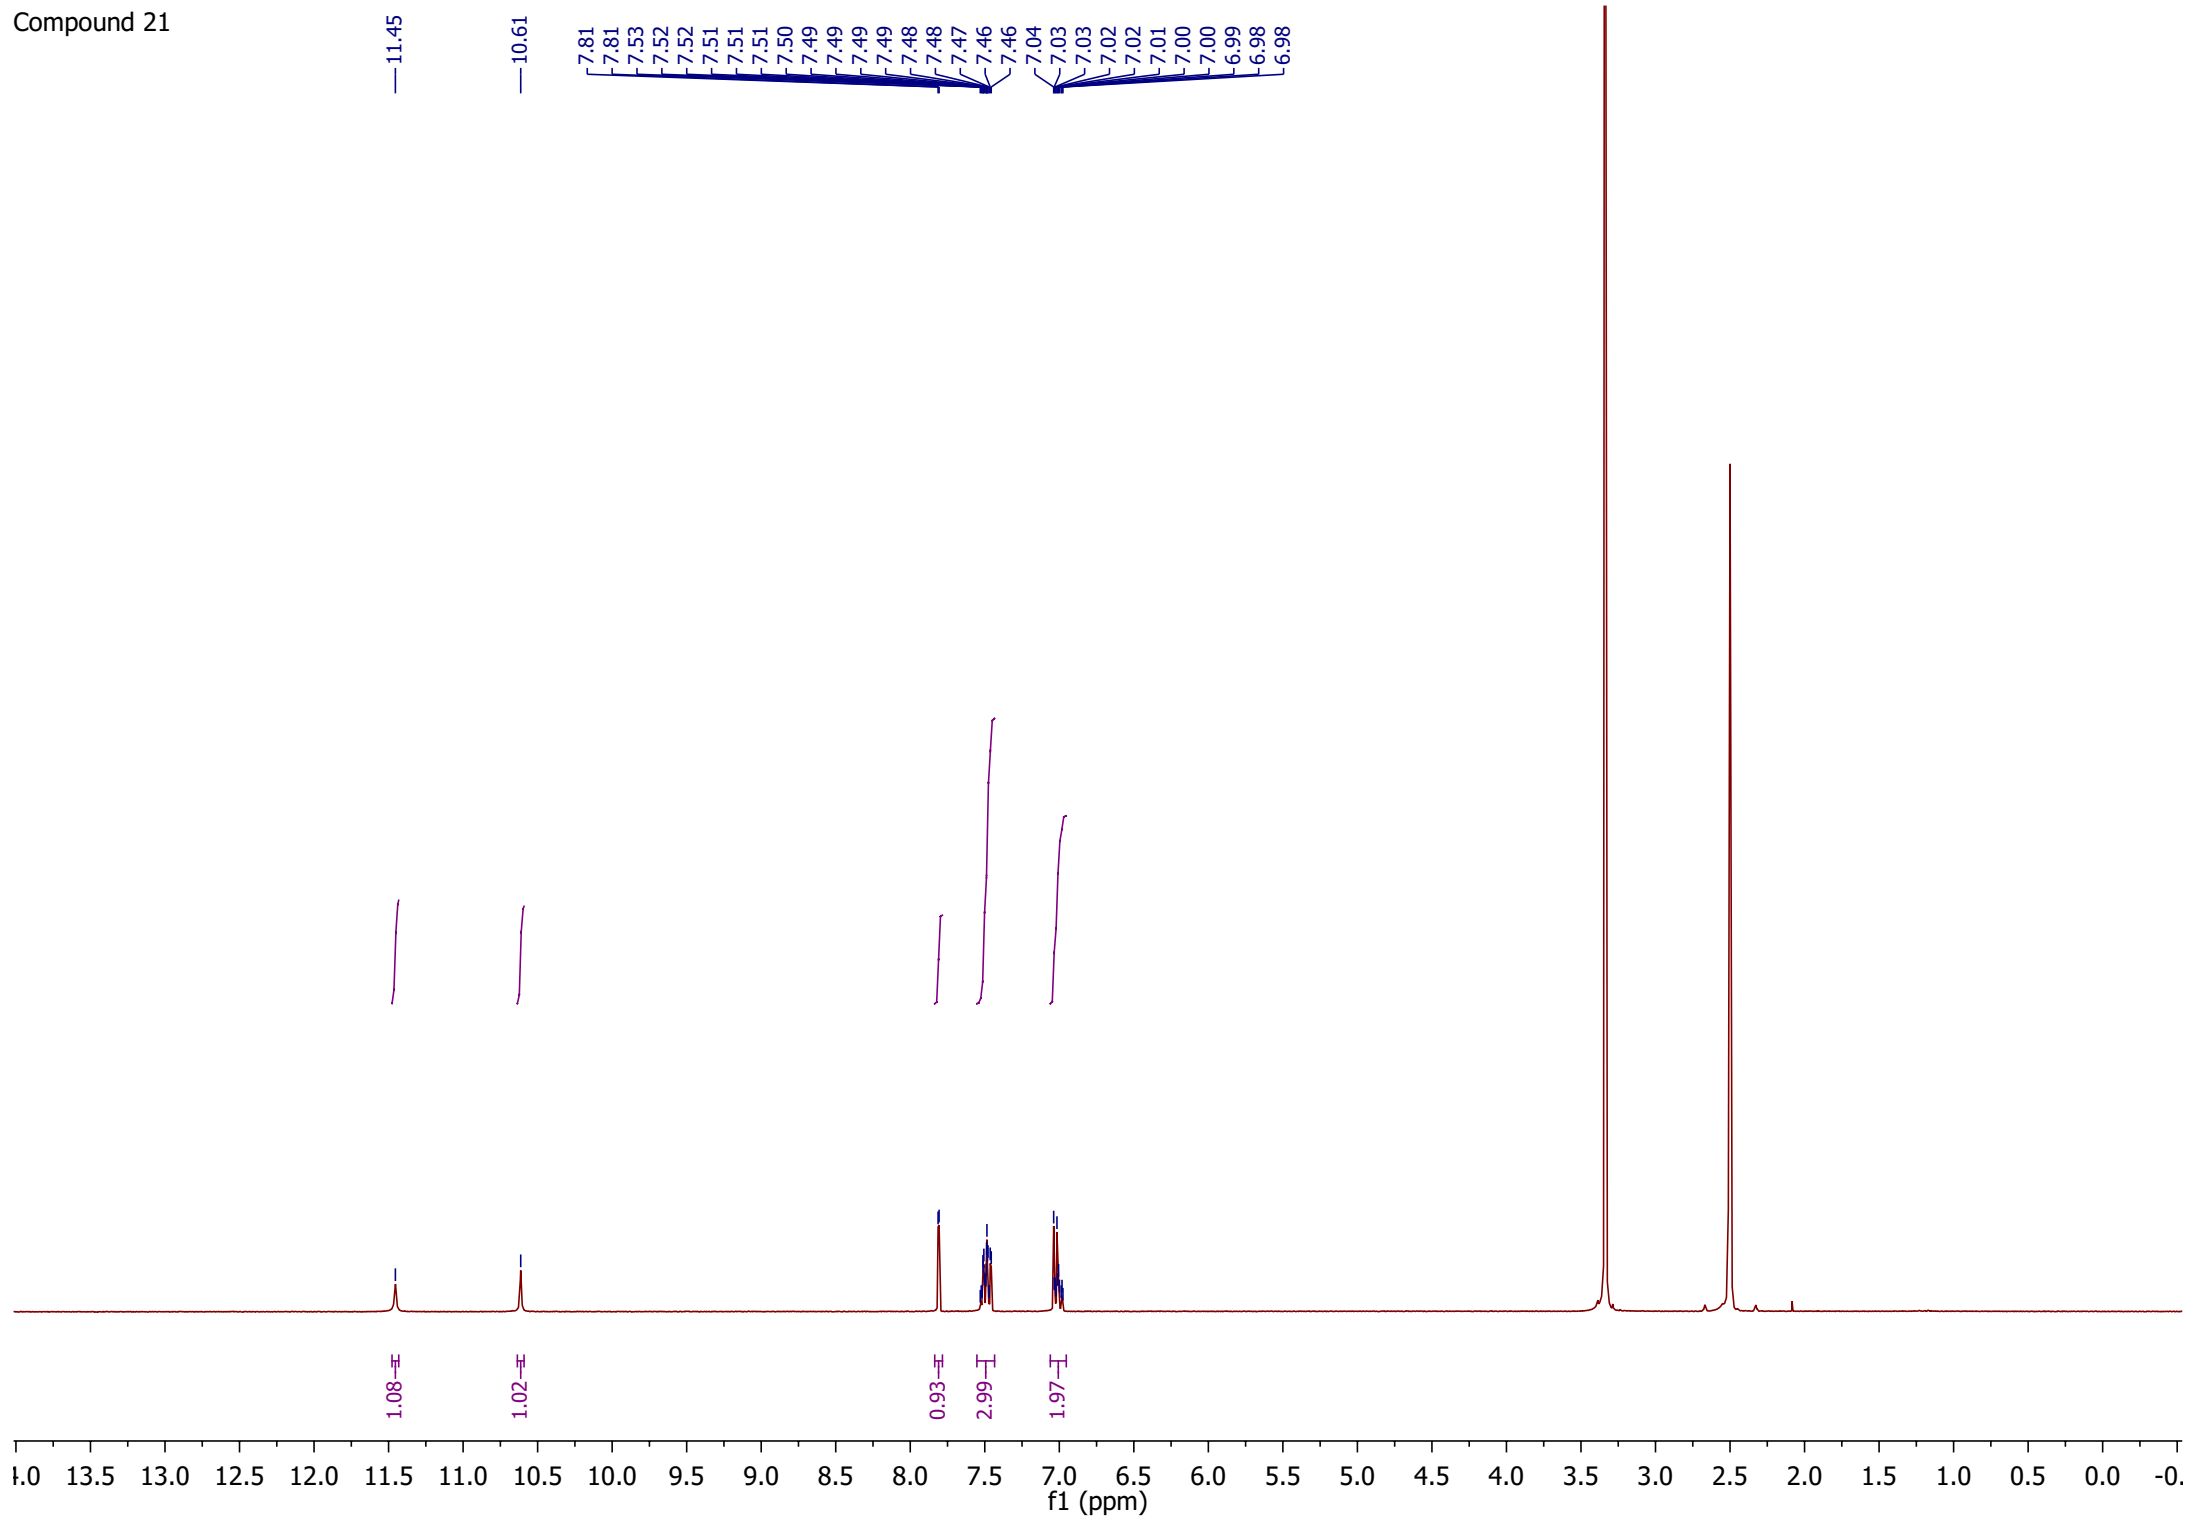

Compound 21

165.0  
163.7  
163.5  
161.3  
161.1  
156.0  
141.0  
140.8  
140.7  
133.1  
128.7  
122.8  
120.6  
119.0  
103.5  
103.4  
103.3  
103.2  
99.5  
99.2  
99.0

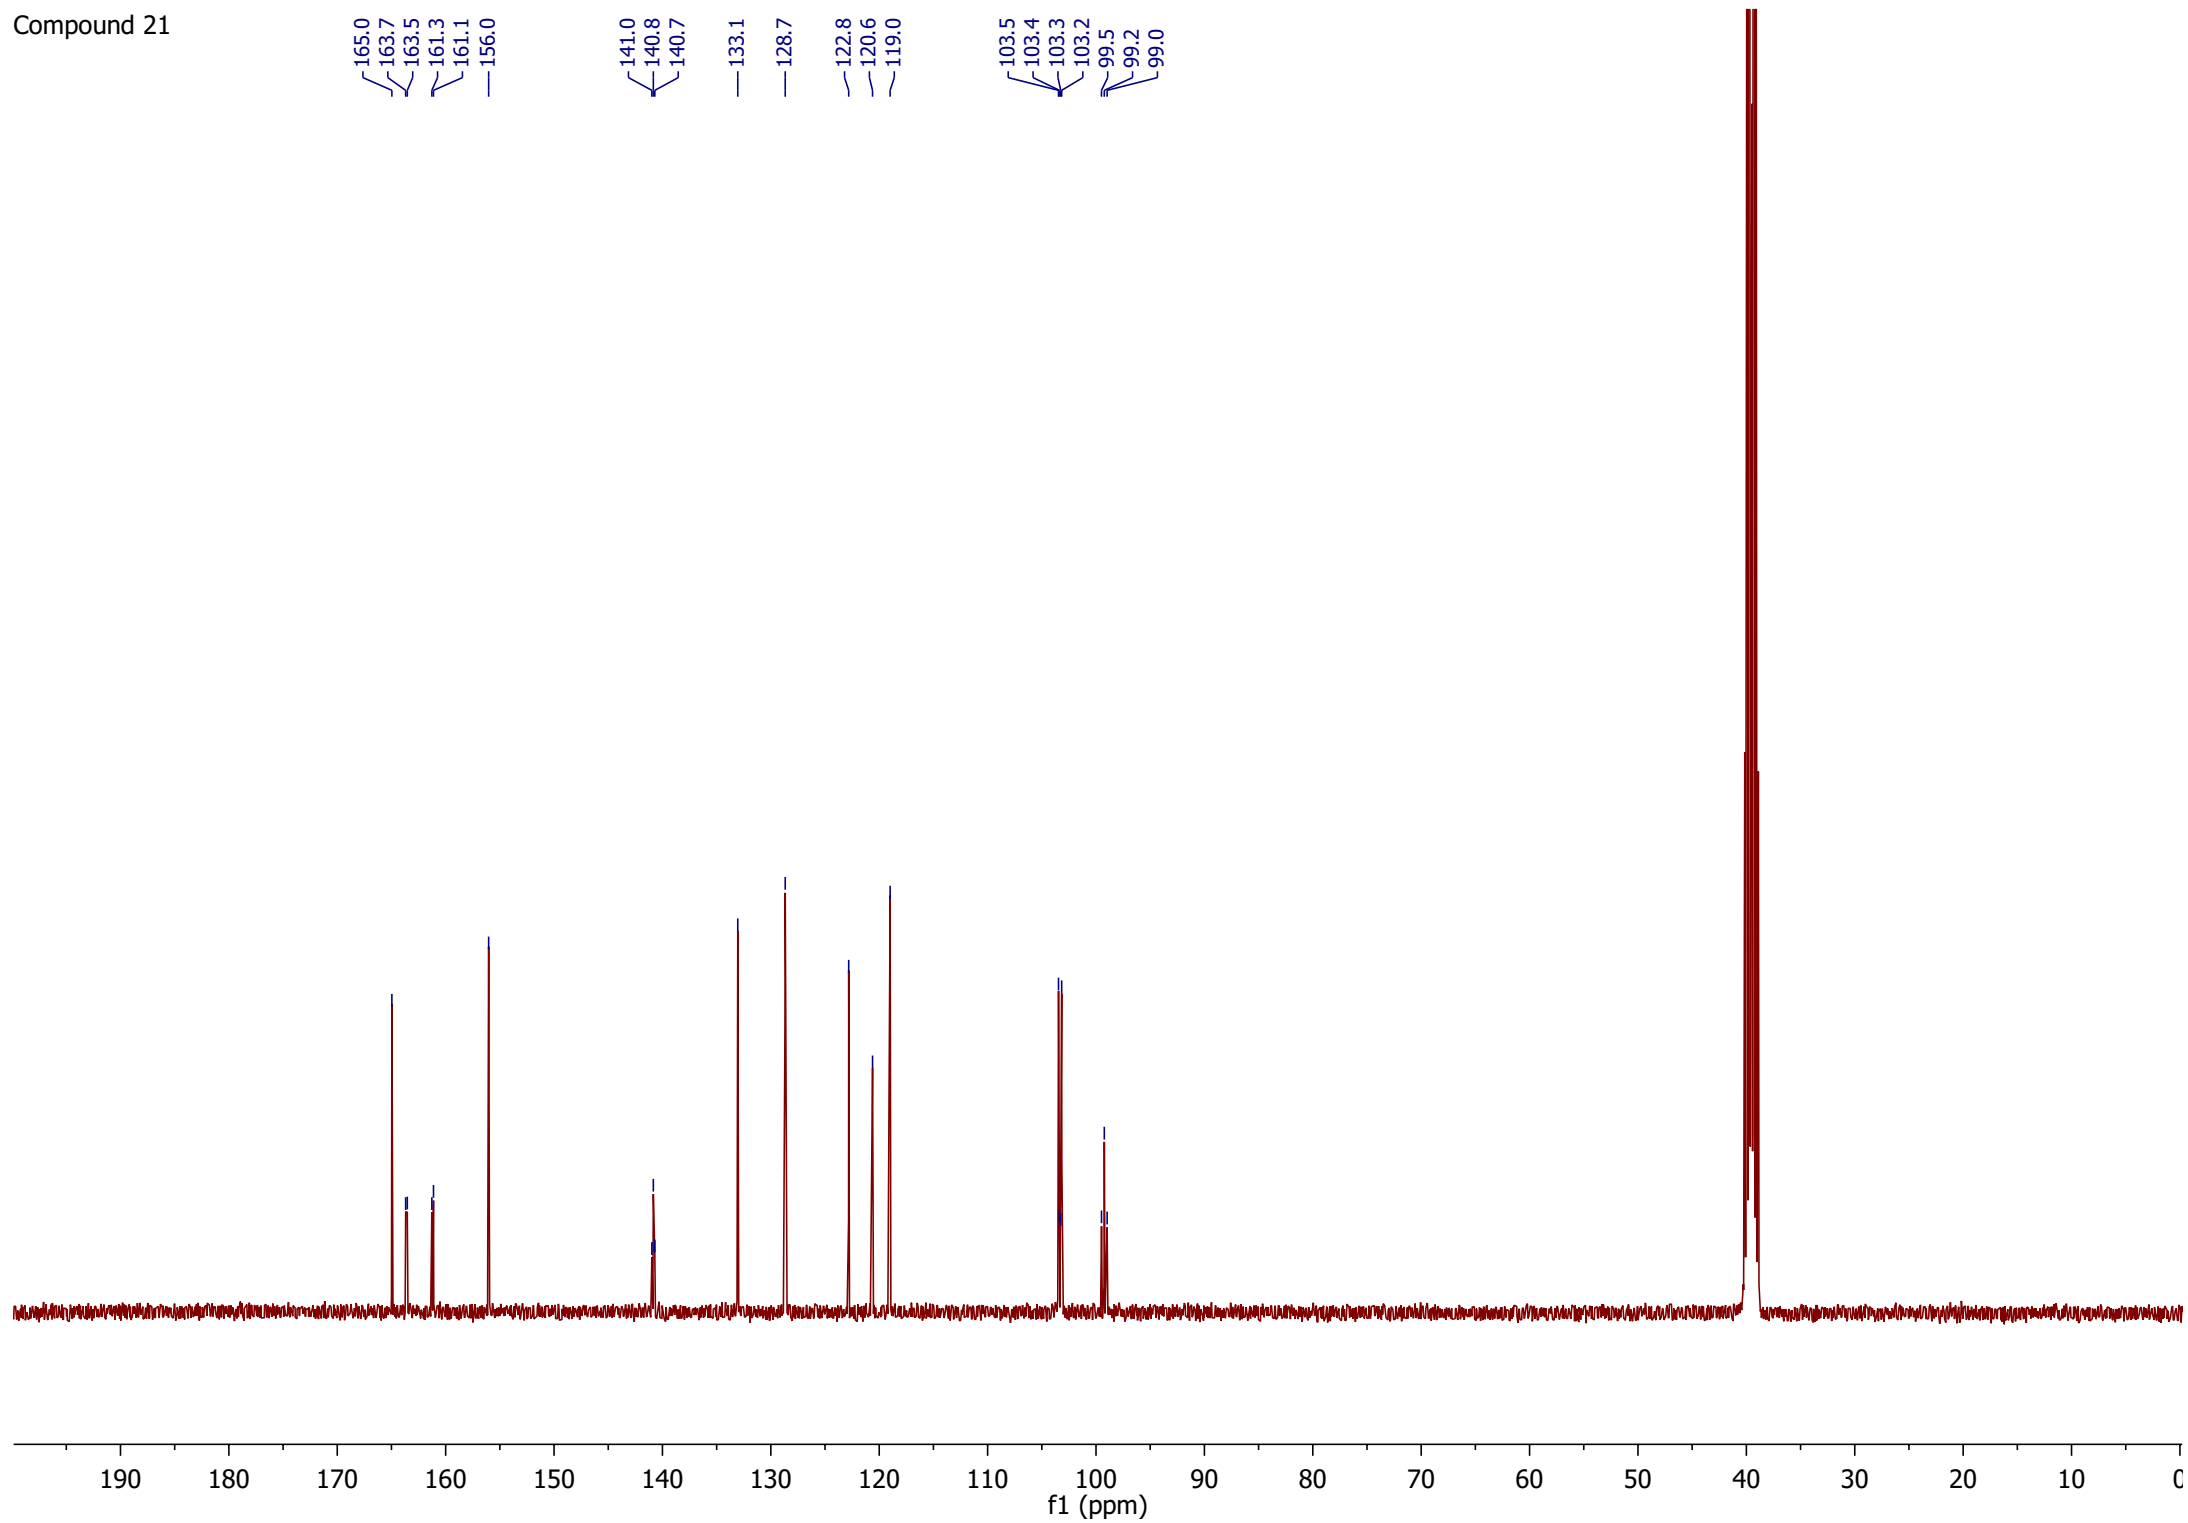

Compound 23

11.5  
11.4  
11.3  
10.7  
10.7  
10.7  
10.7

7.8  
7.8  
7.8  
7.5  
7.5  
7.4  
7.4  
7.4  
7.0  
7.0  
7.0  
7.0

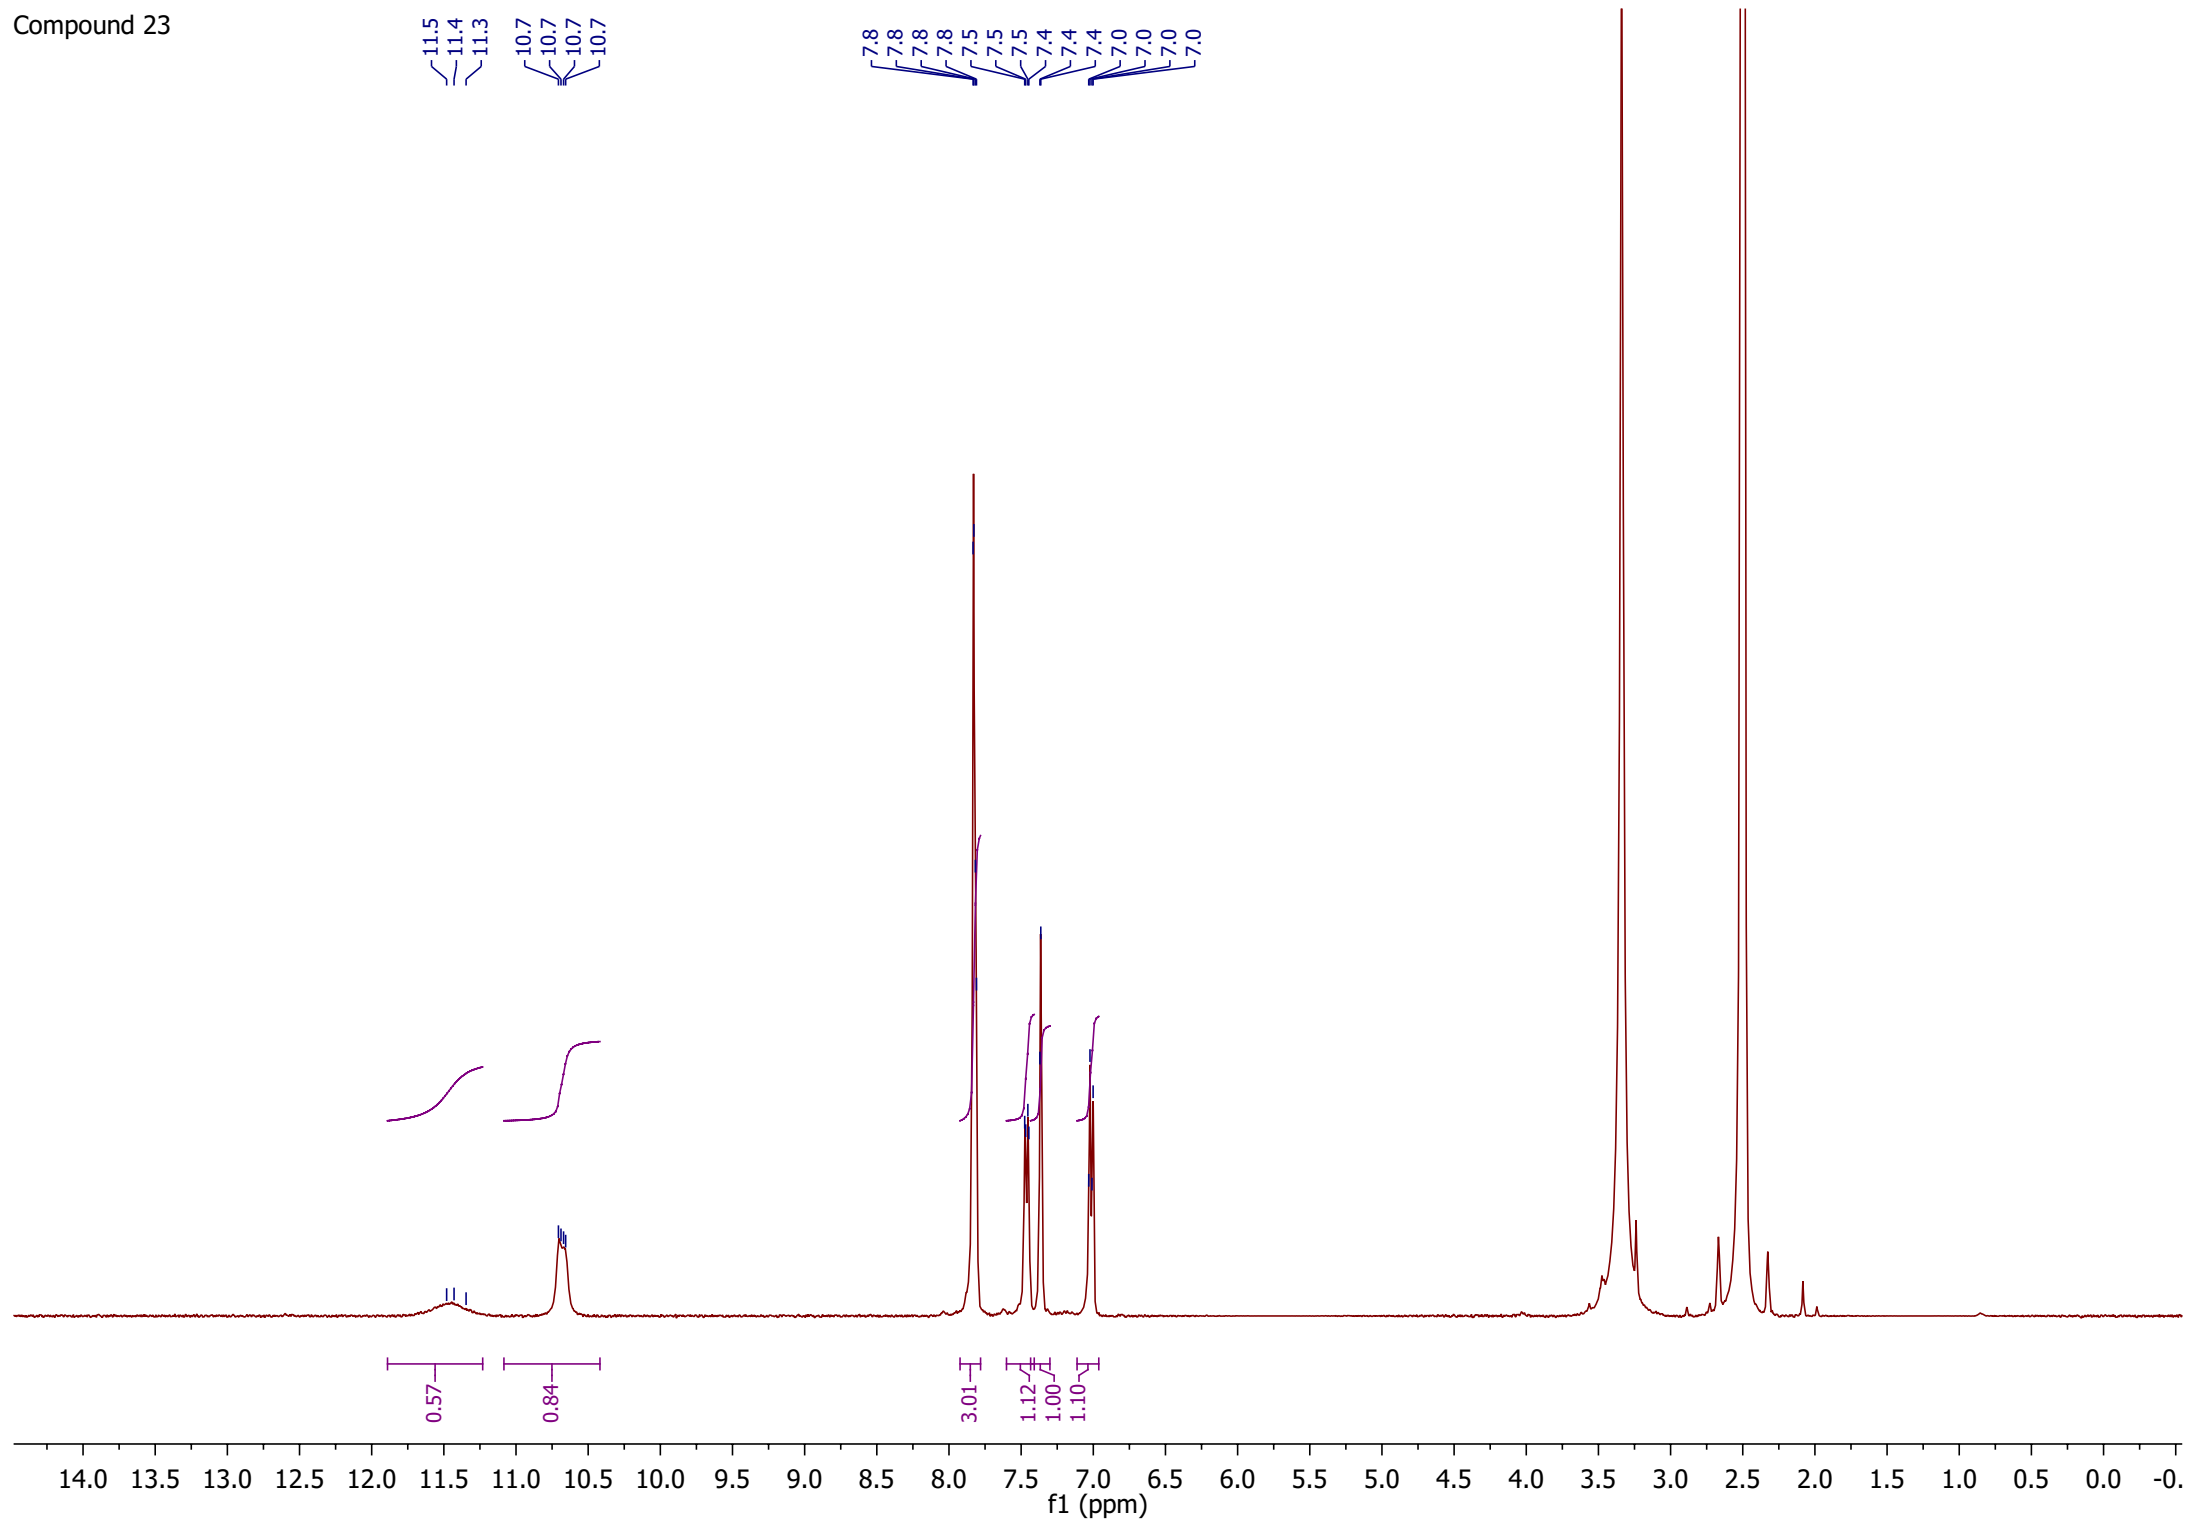

Compound 23

— 165.1  
— 156.4  
— 156.3  
— 140.9  
— 133.1  
— 128.6  
— 122.8  
— 122.3  
— 121.8  
— 121.8  
— 119.0

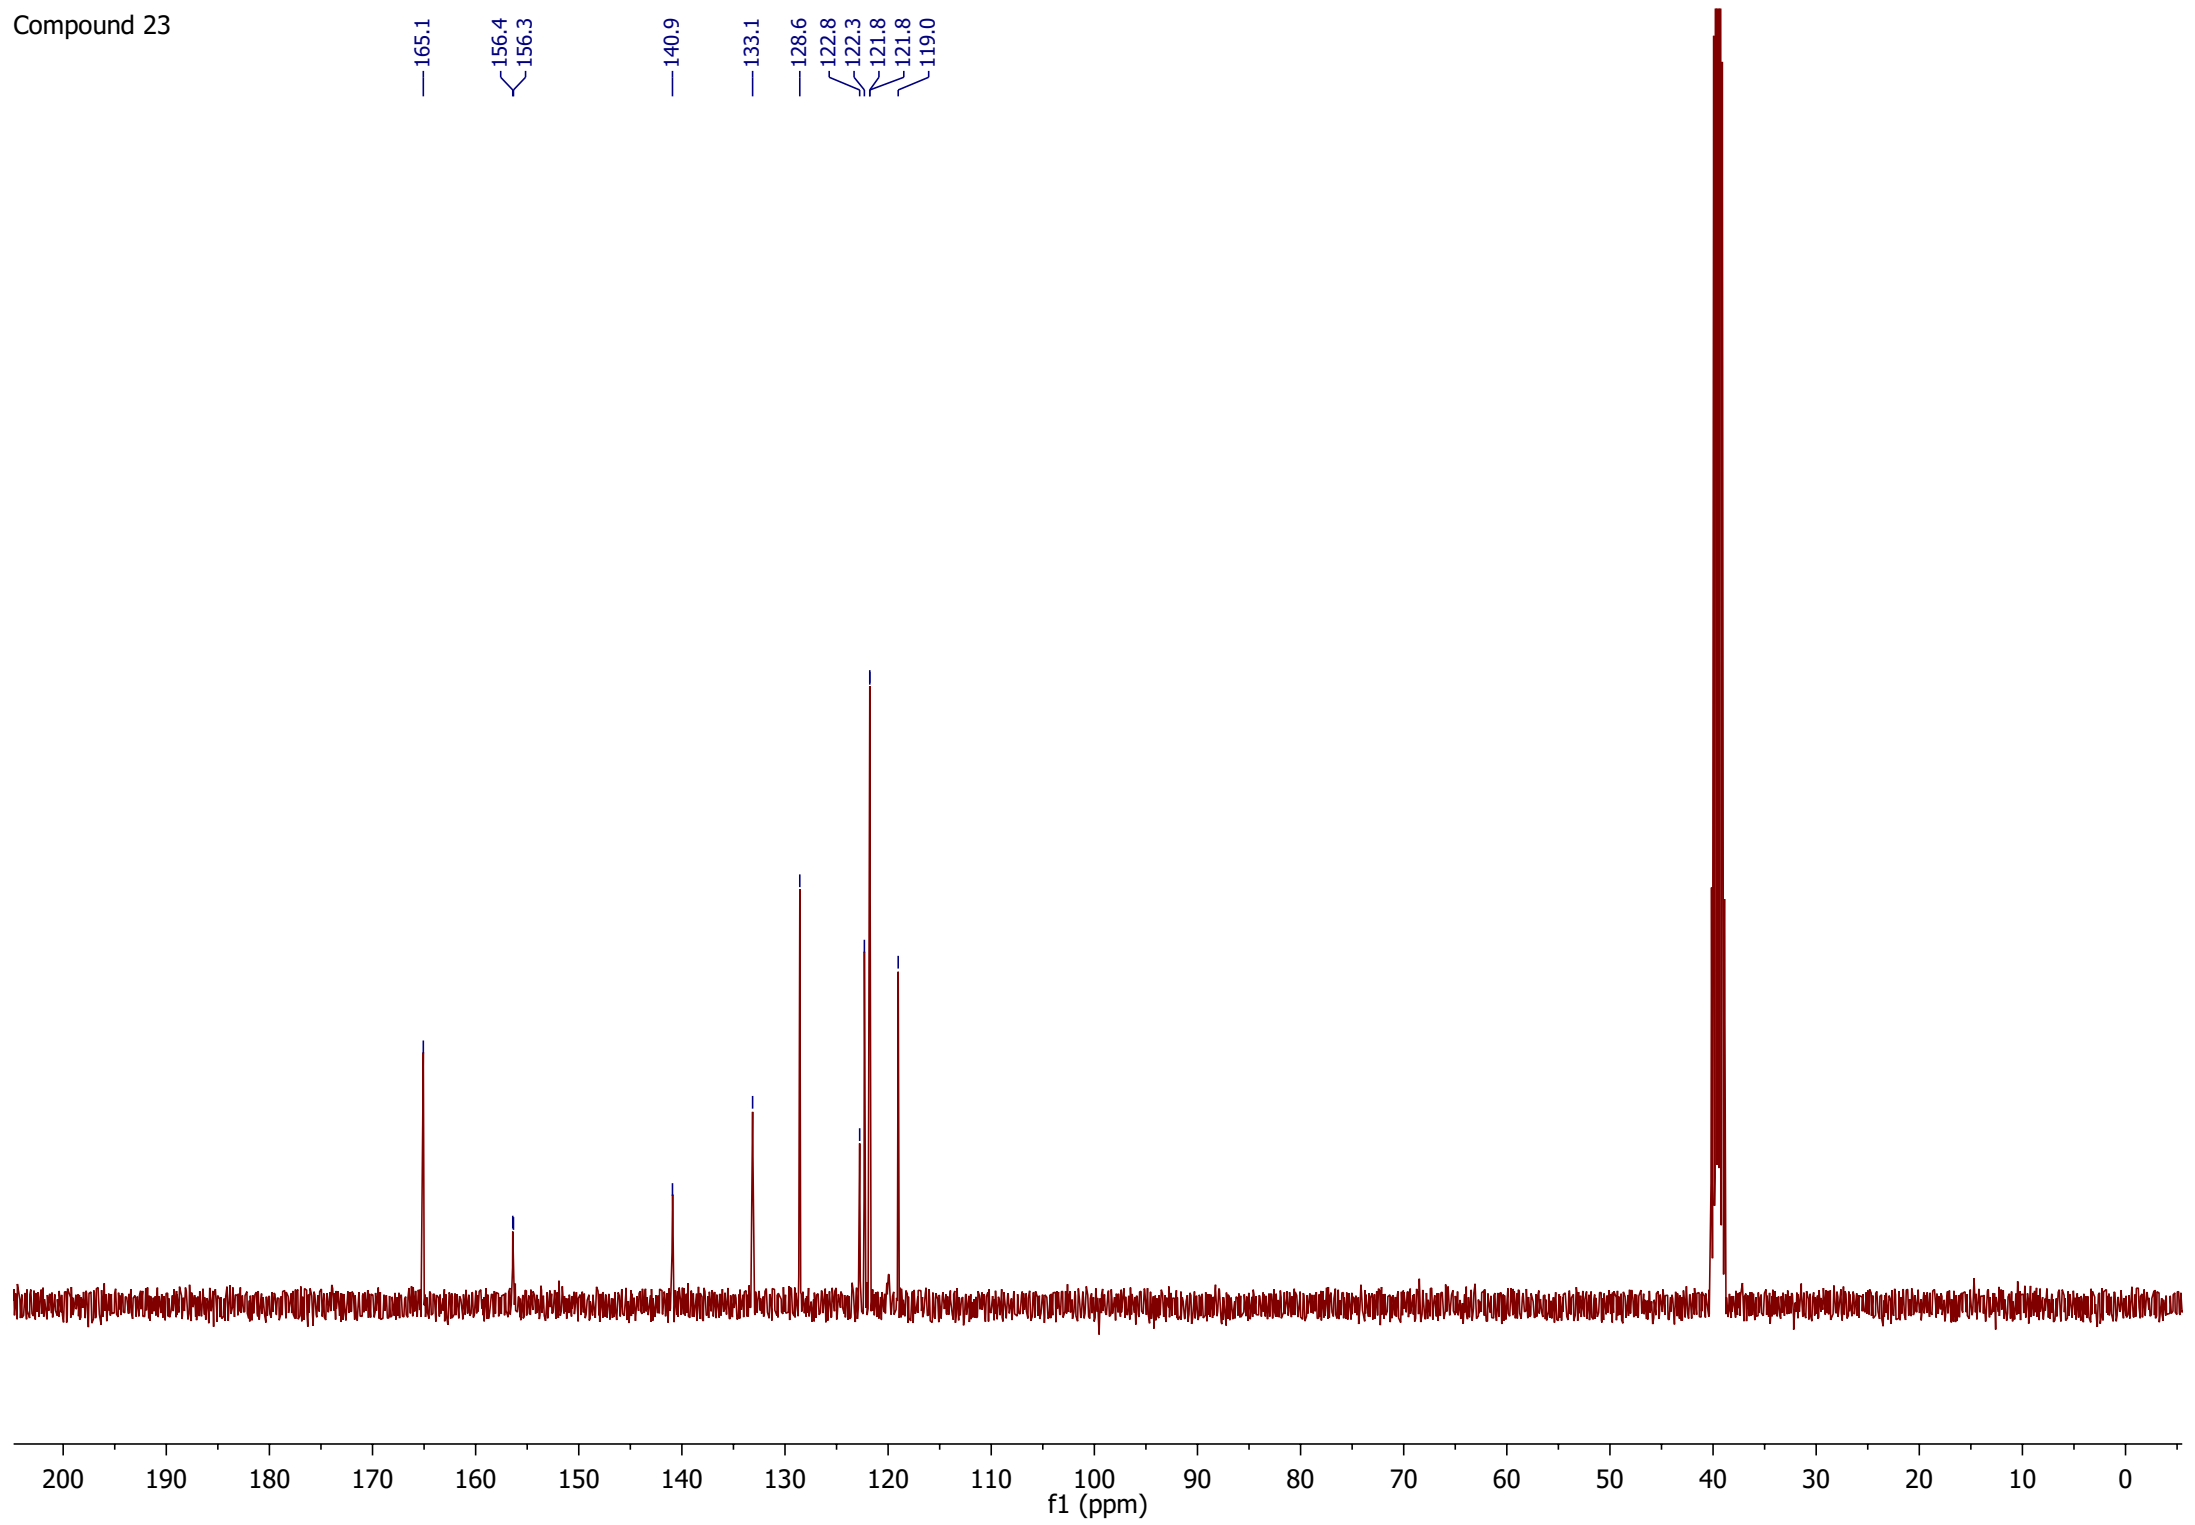

Compound 24

—12.51

—11.36

9.14  
9.14

7.99  
7.98  
7.97  
7.96  
7.57  
7.56  
7.55  
7.54  
7.12  
7.10

0.95

0.91

1.04

2.00

1.07

1.02

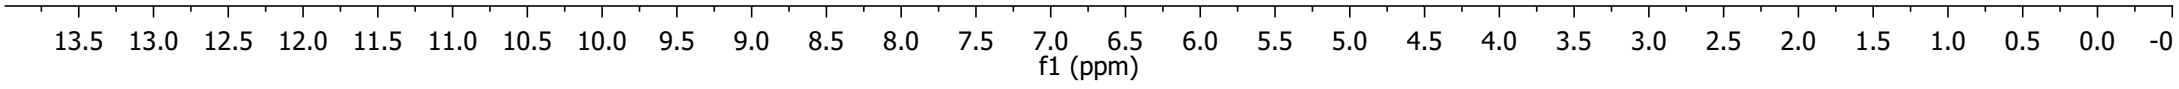



Compound 24

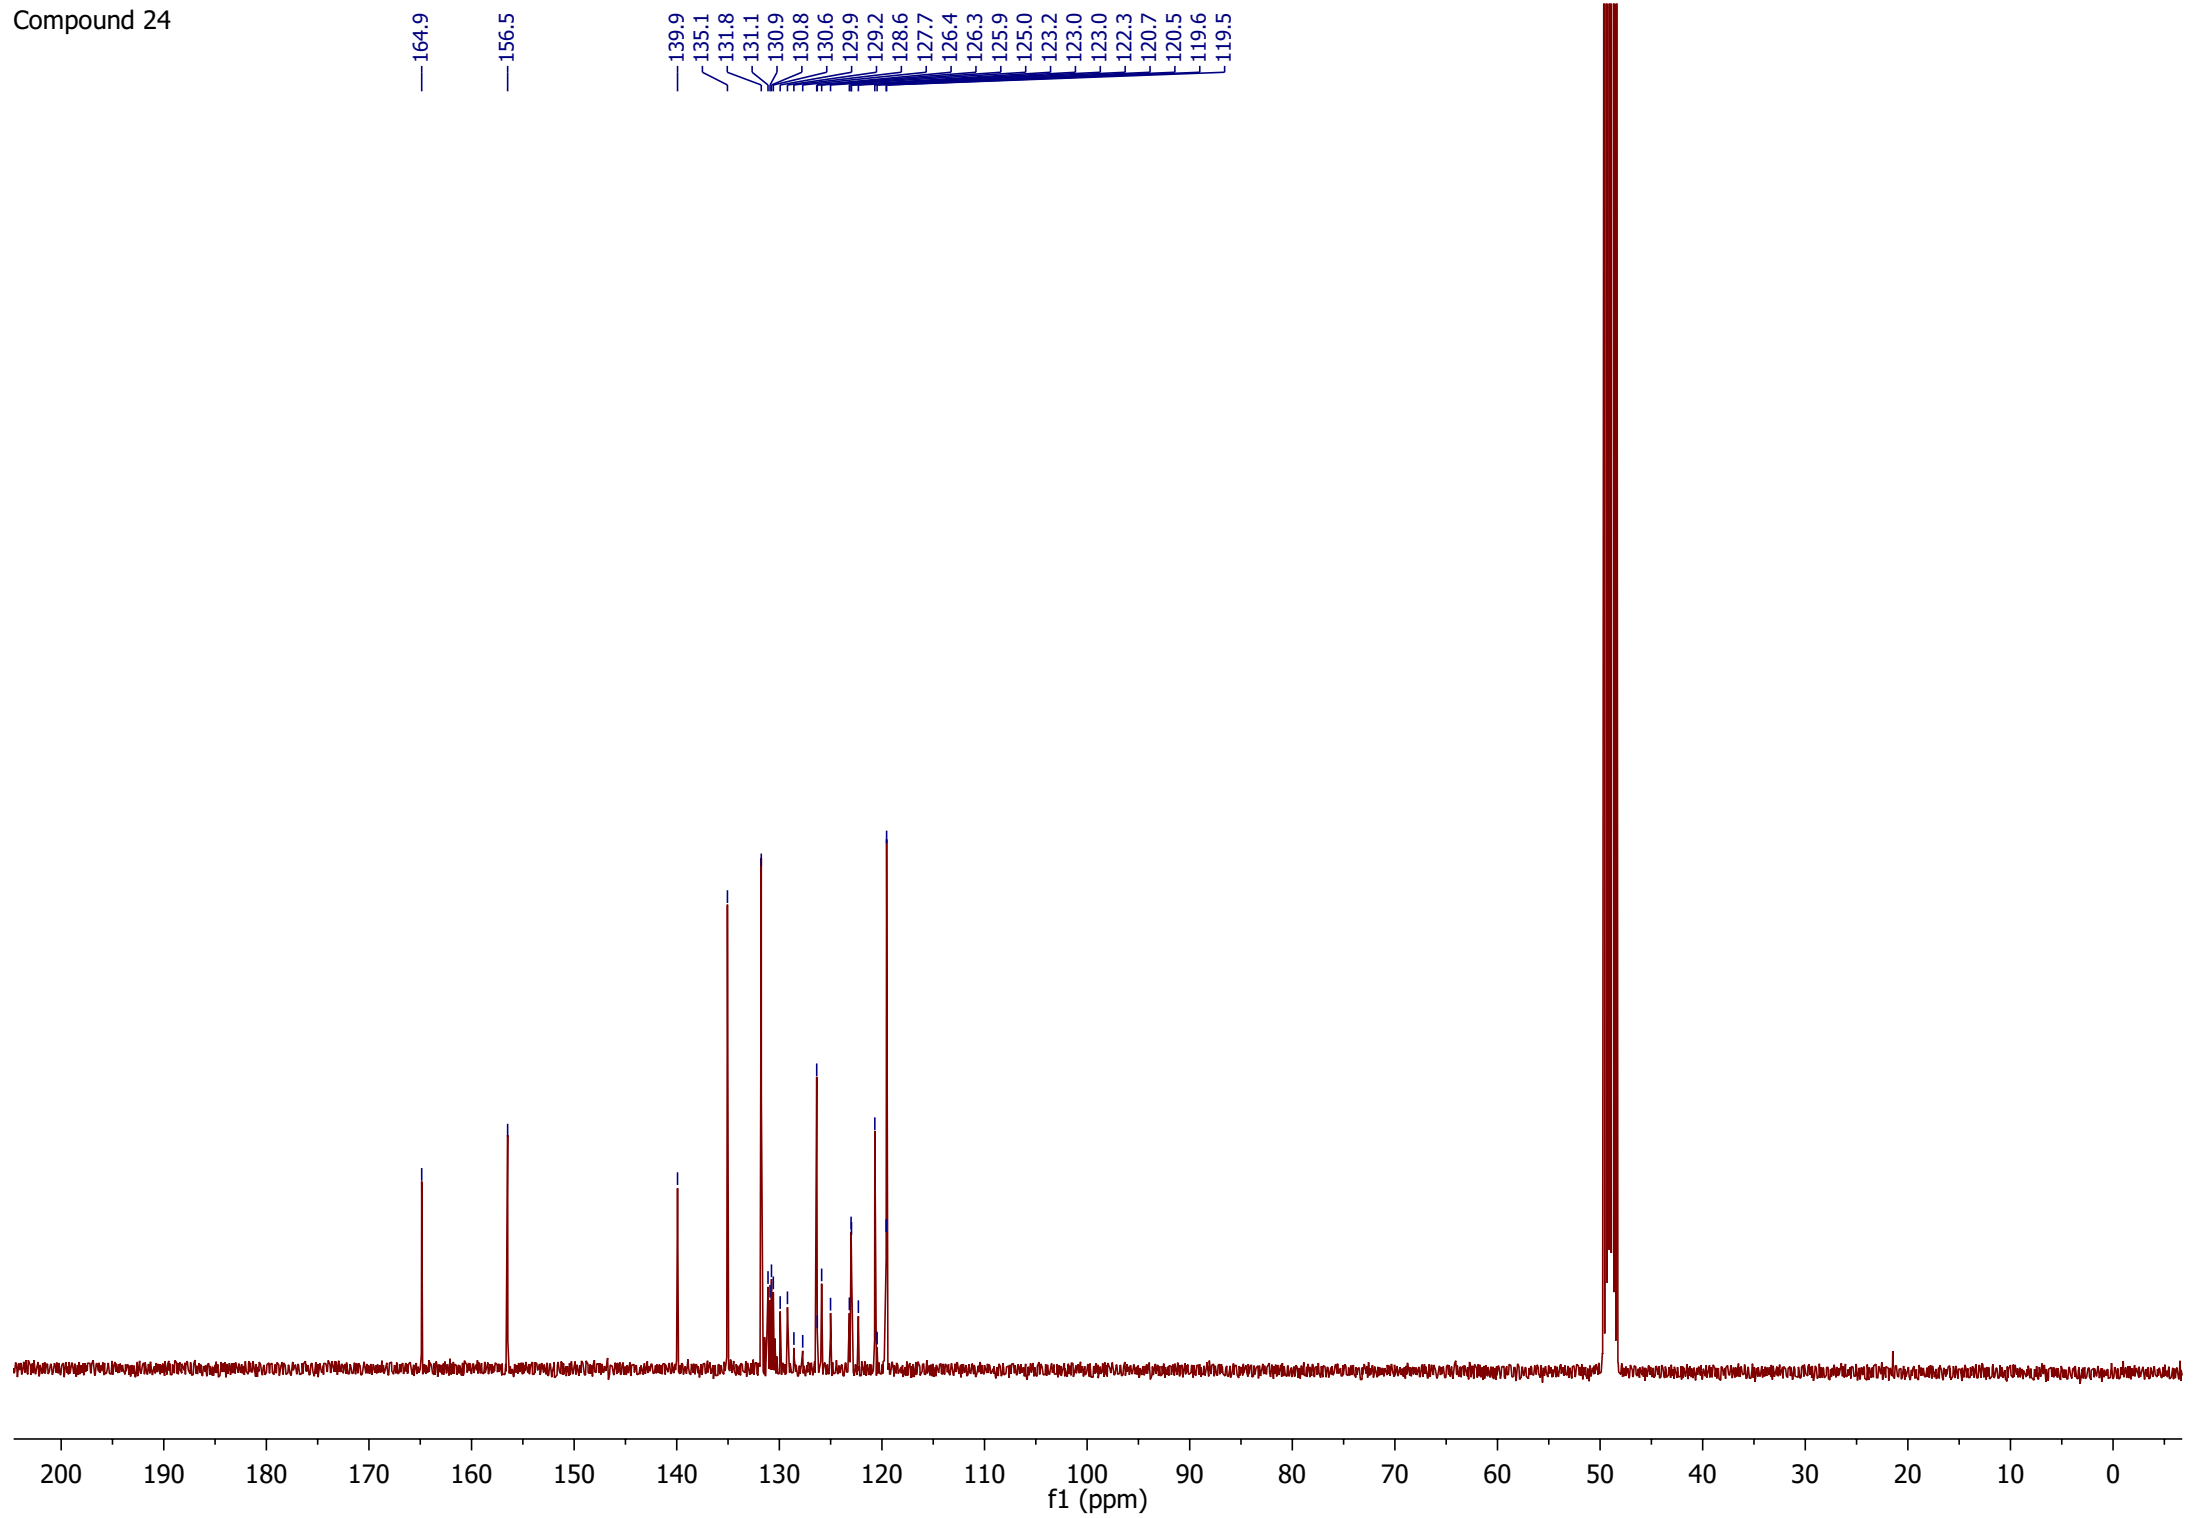

Compound 25

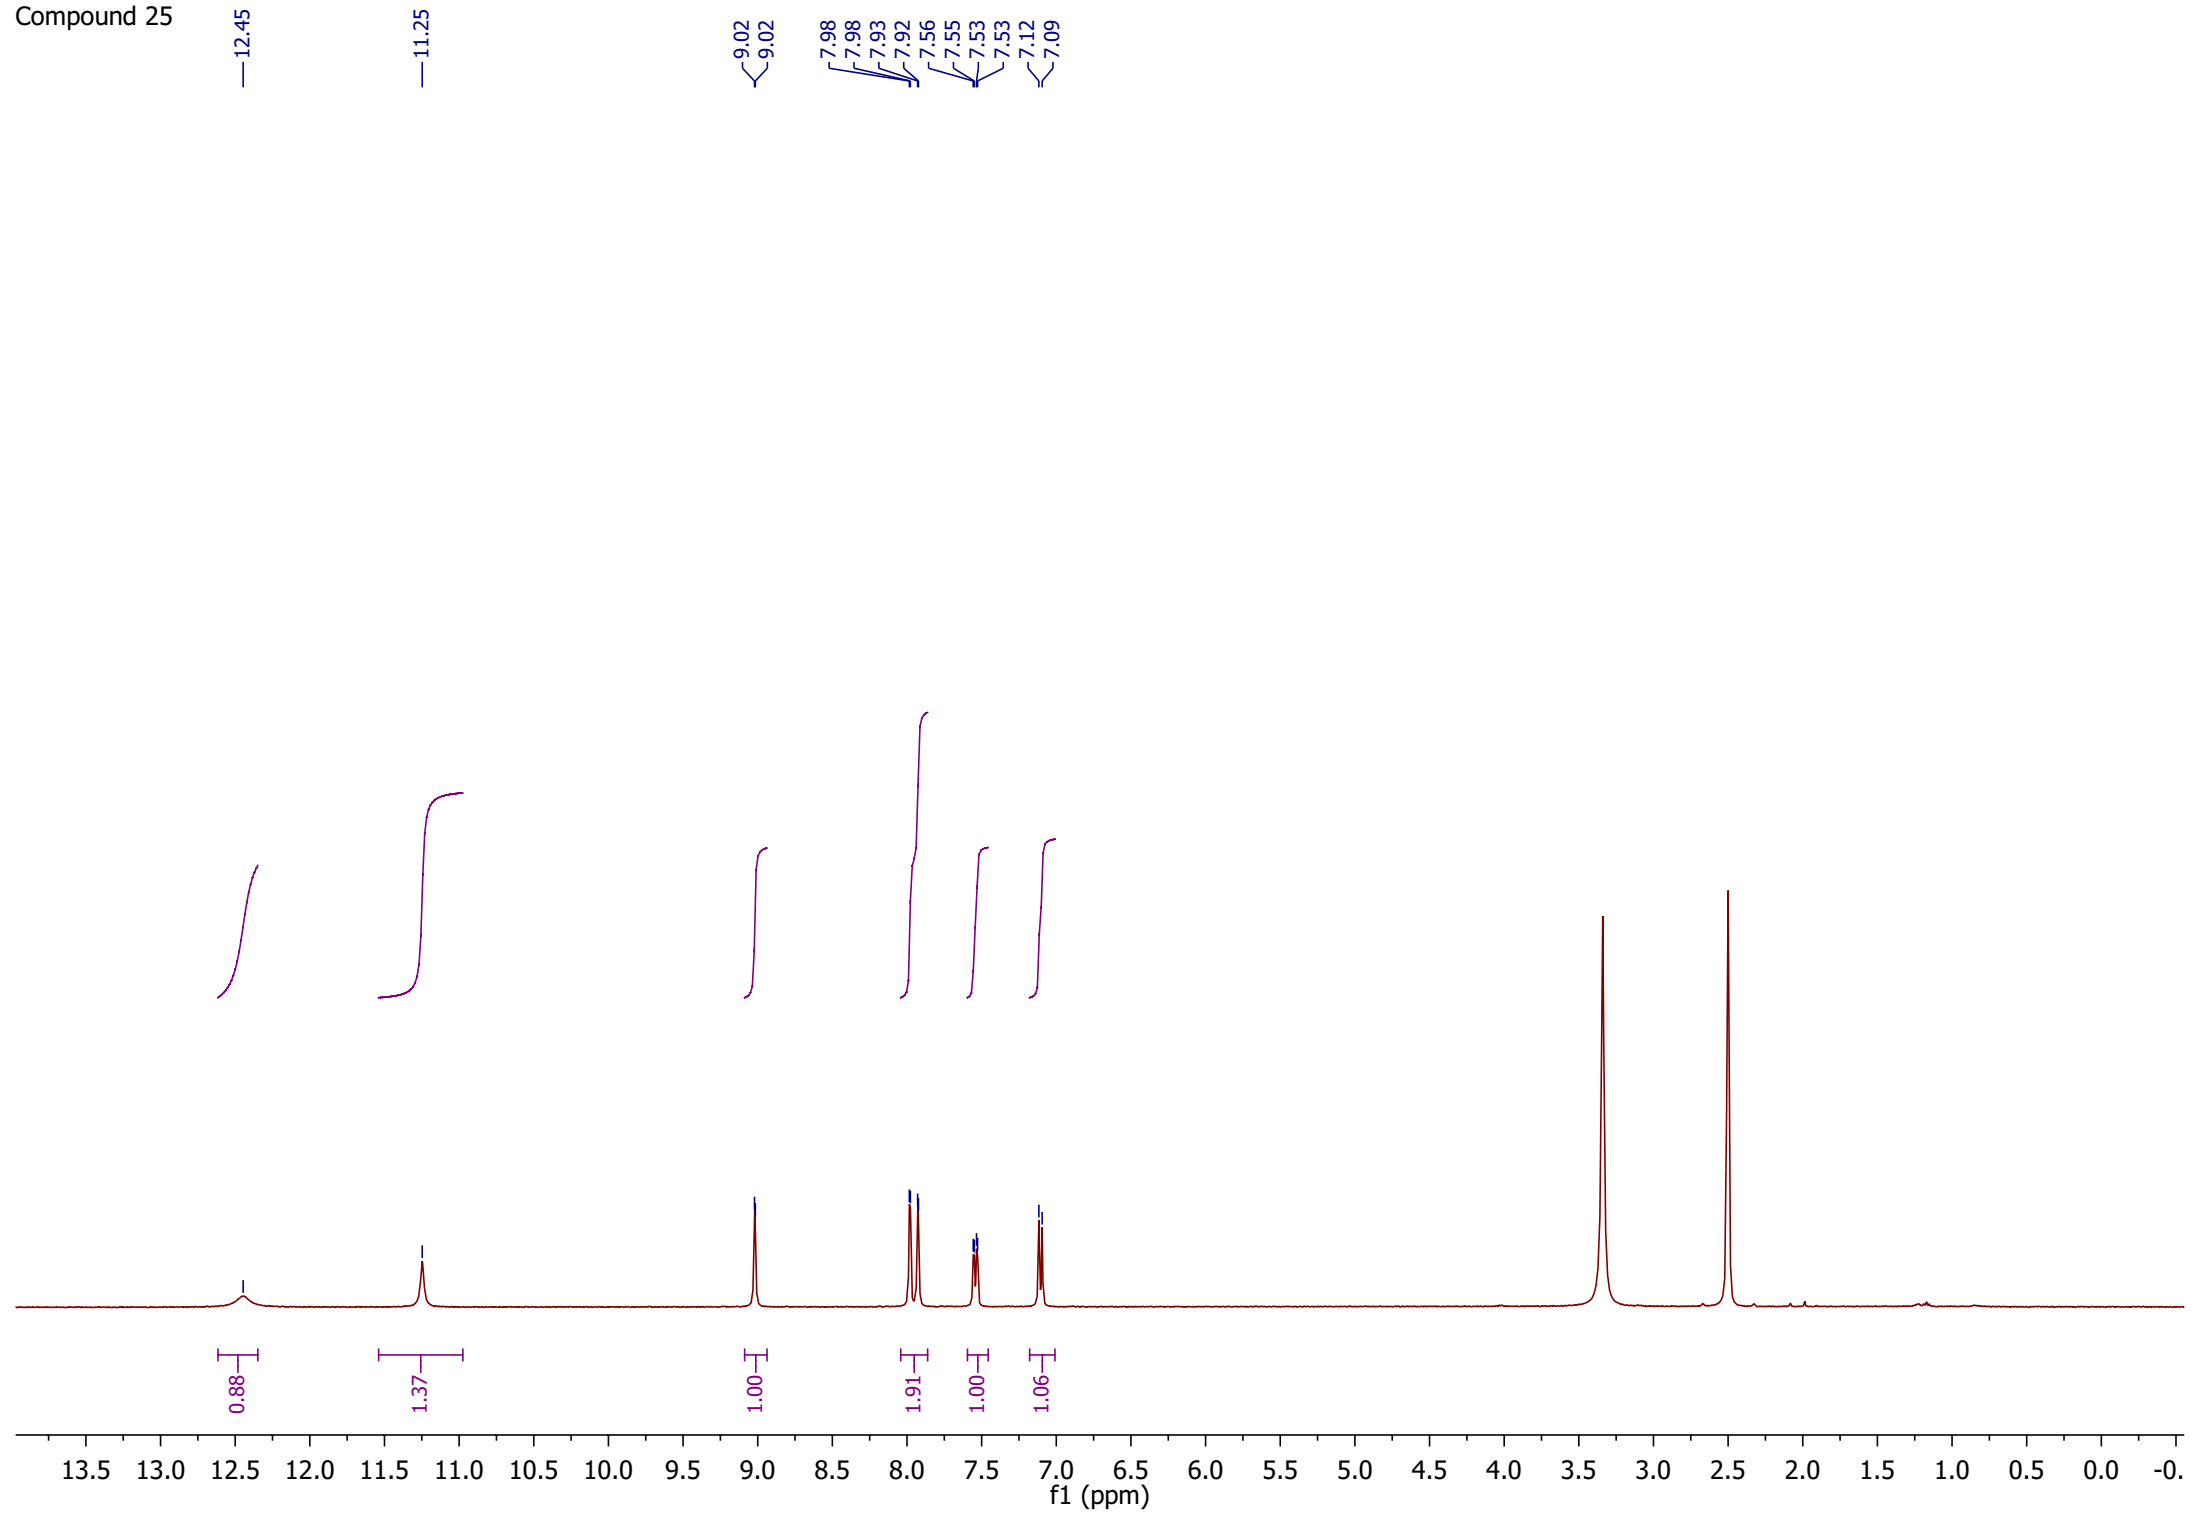

Compound 25

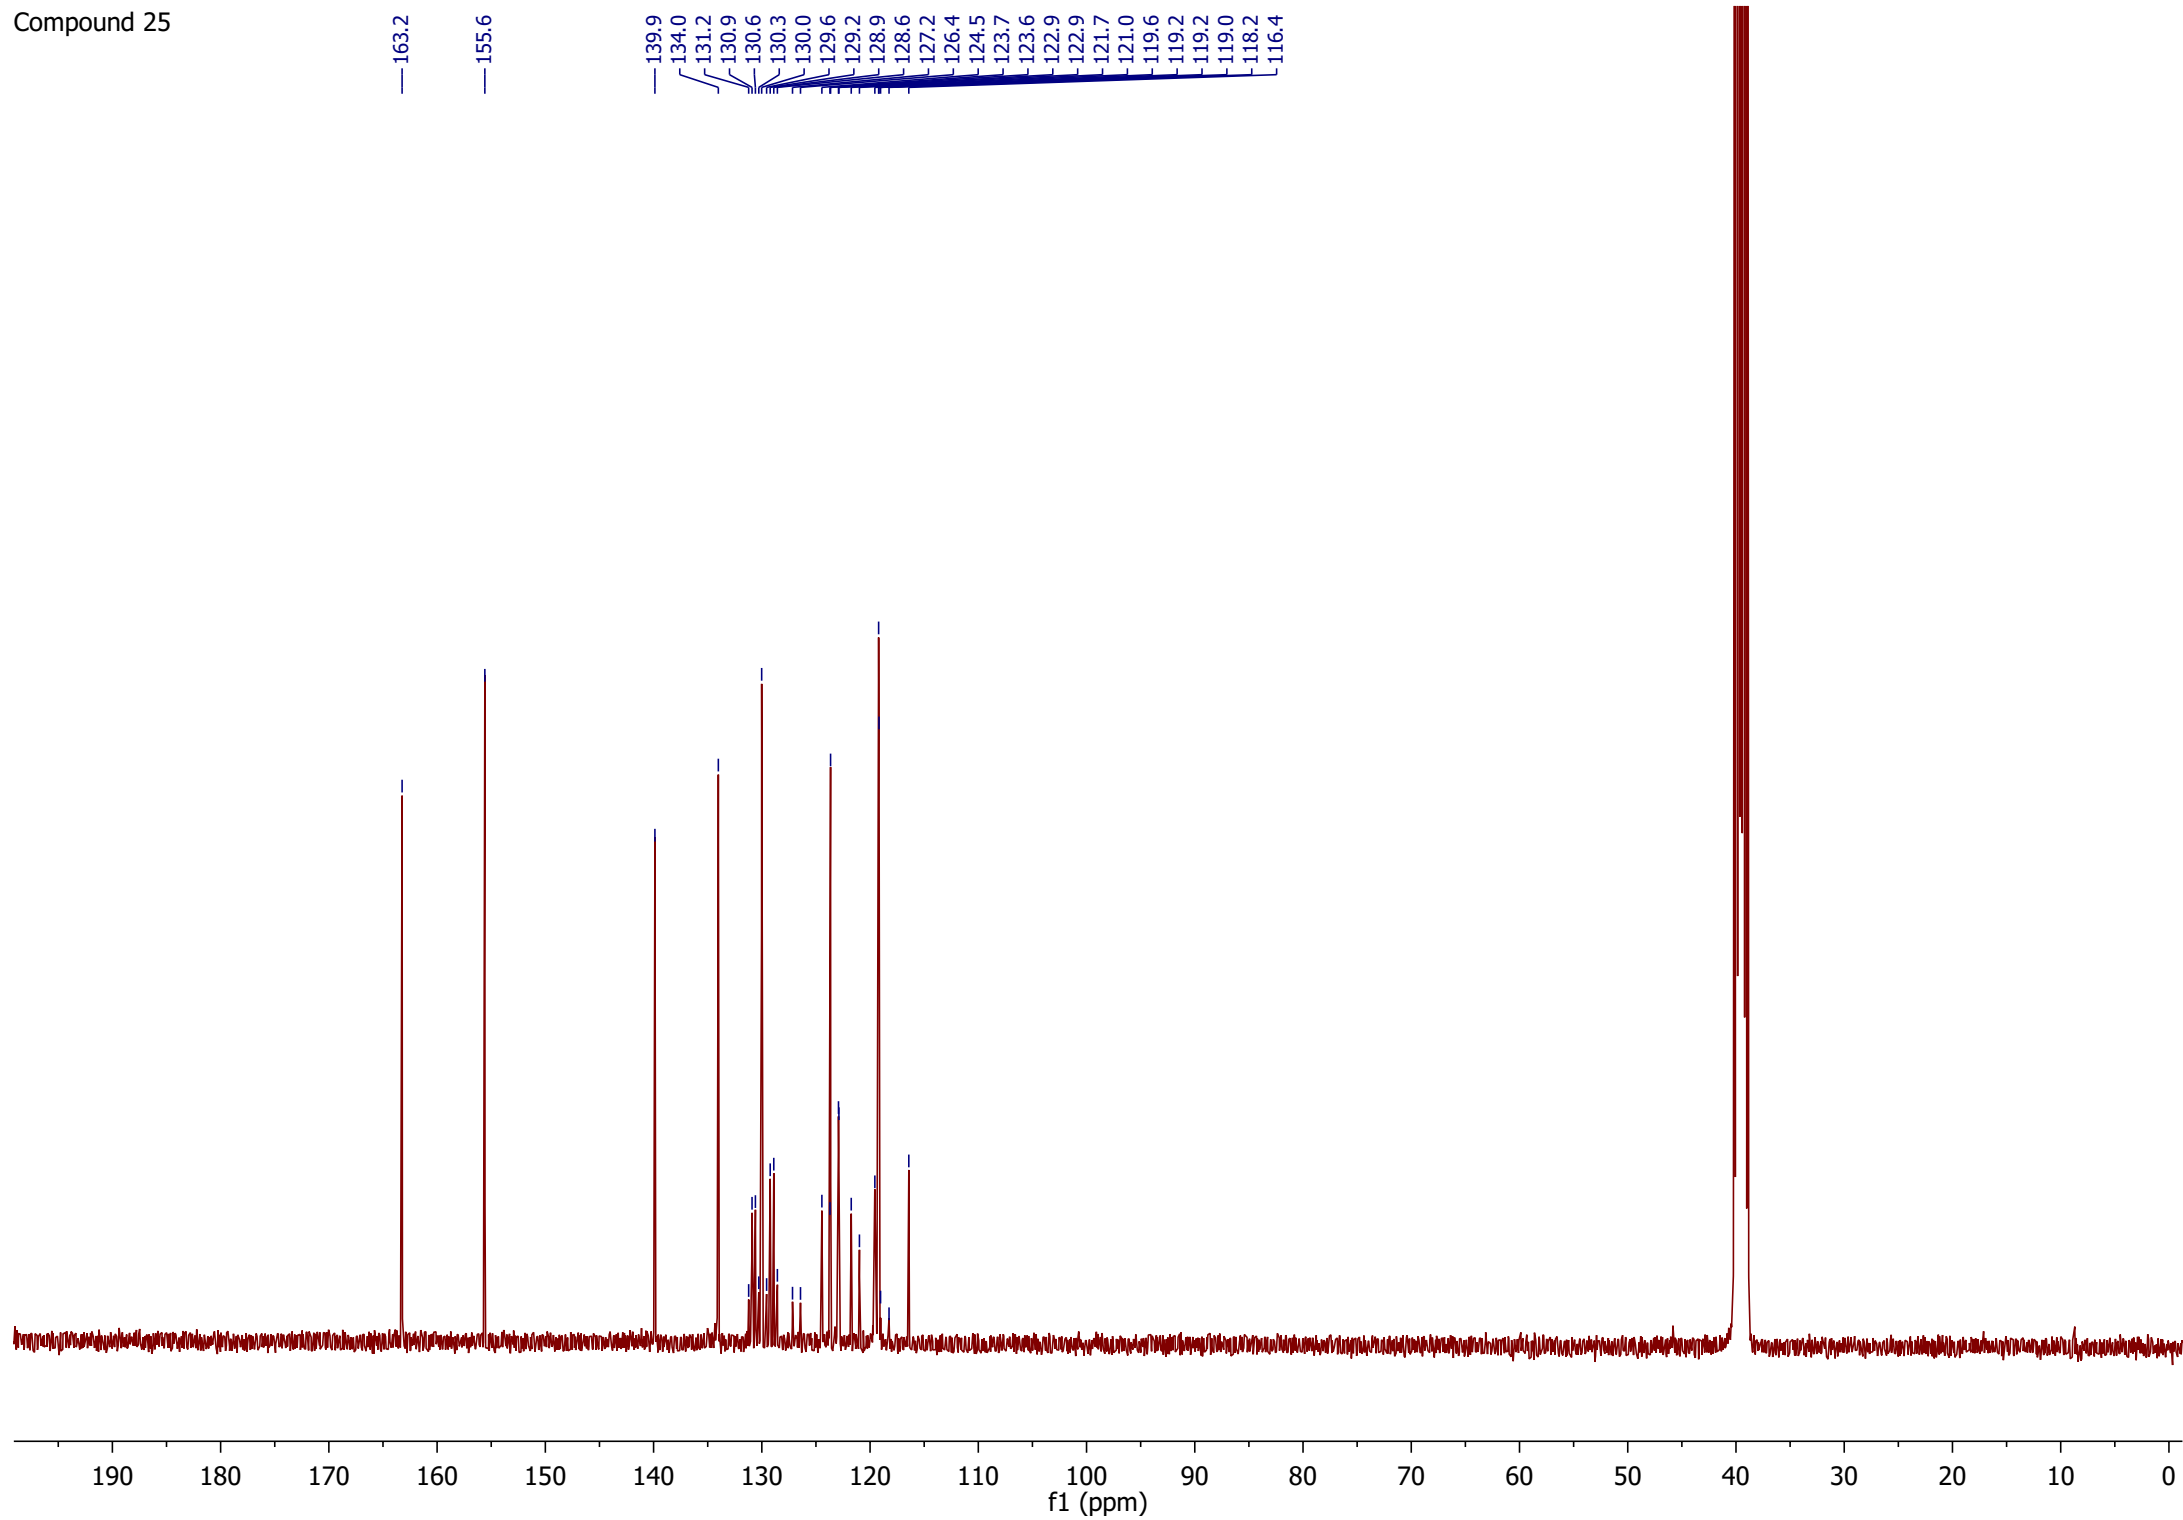

Compound 27

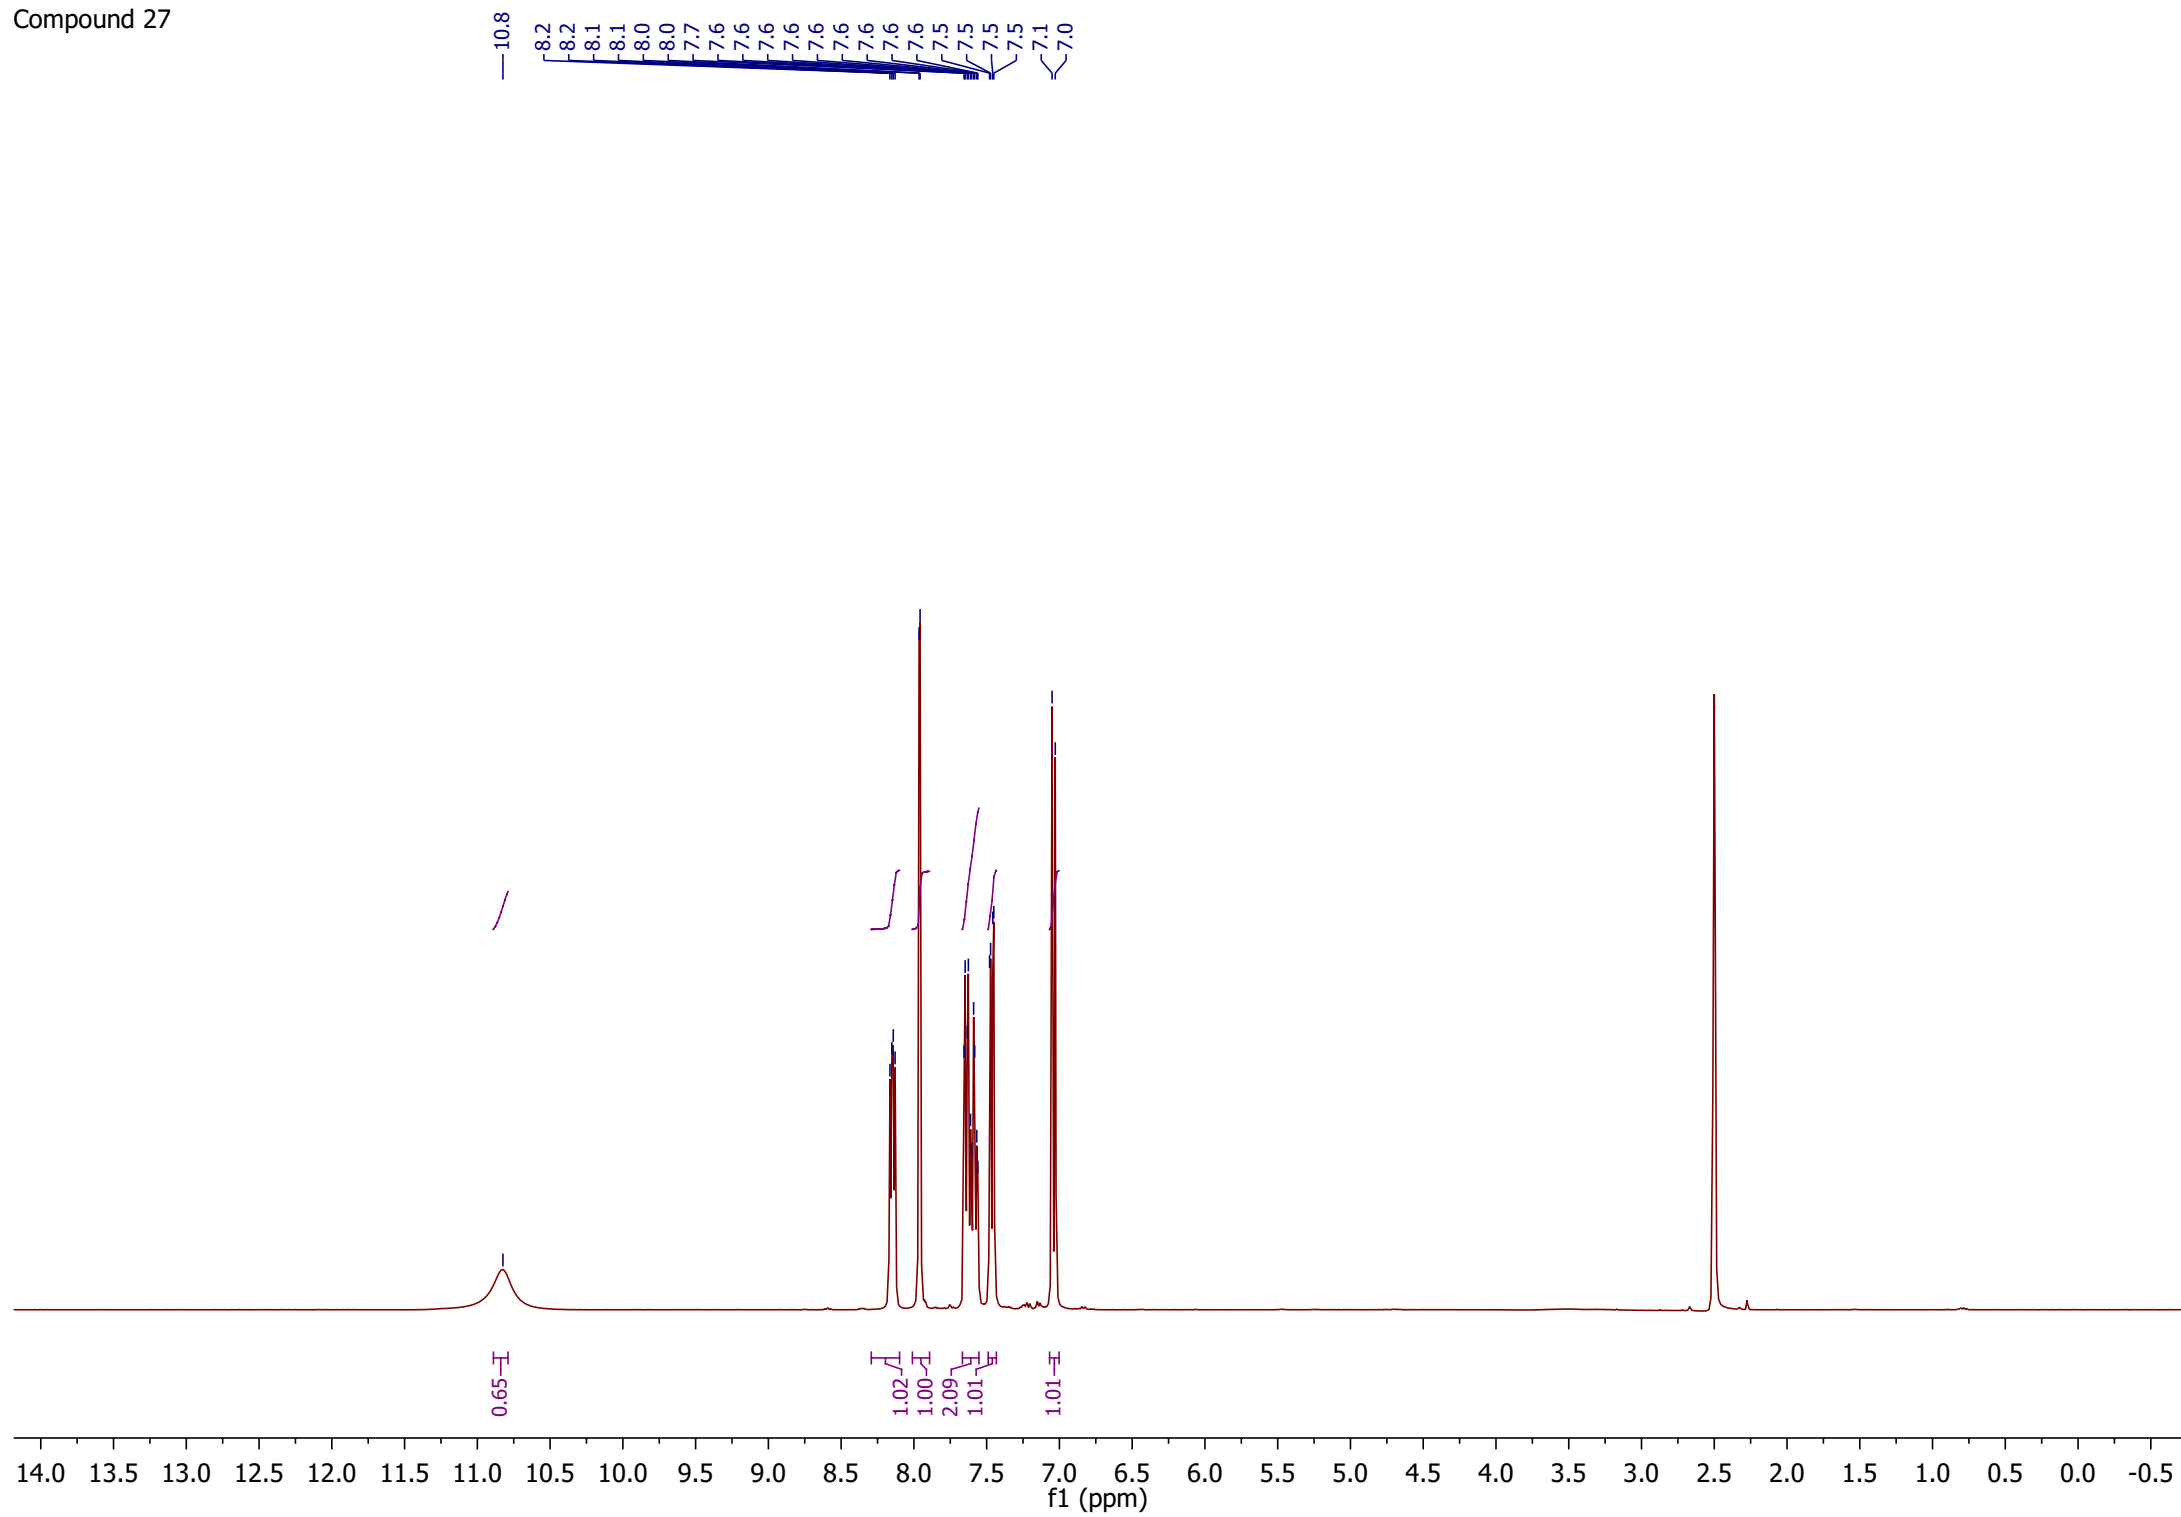

Compound 27

163.7  
159.8  
157.4  
156.4  
133.6  
131.6  
129.6  
129.1  
129.0  
124.3  
124.2  
123.6  
123.5  
123.3  
123.2  
123.1  
123.0  
122.9  
122.7  
122.7  
122.6  
121.6  
121.5  
120.2  
120.0  
119.2  
118.9  
113.8  
113.8  
113.7  
113.7  
113.6  
113.5  
113.4  
113.4

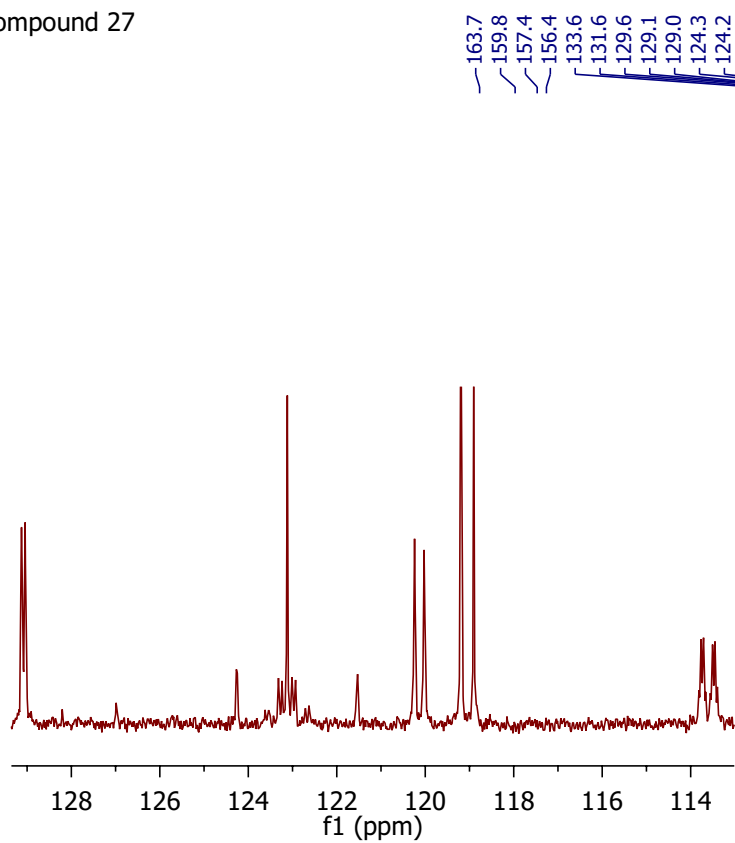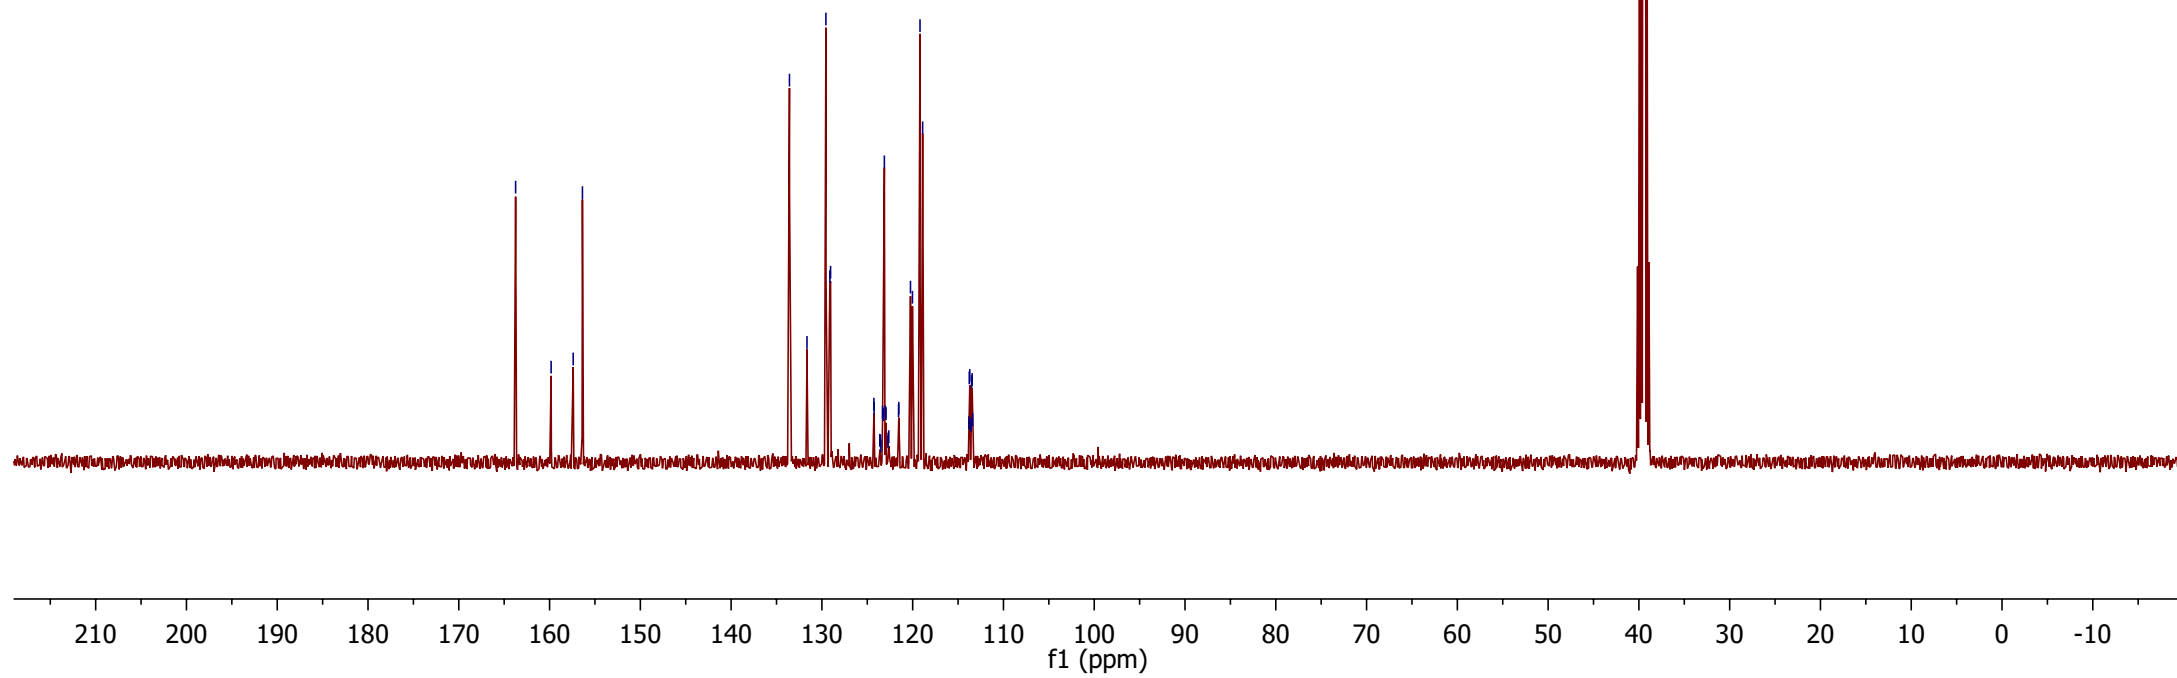

Compound 28

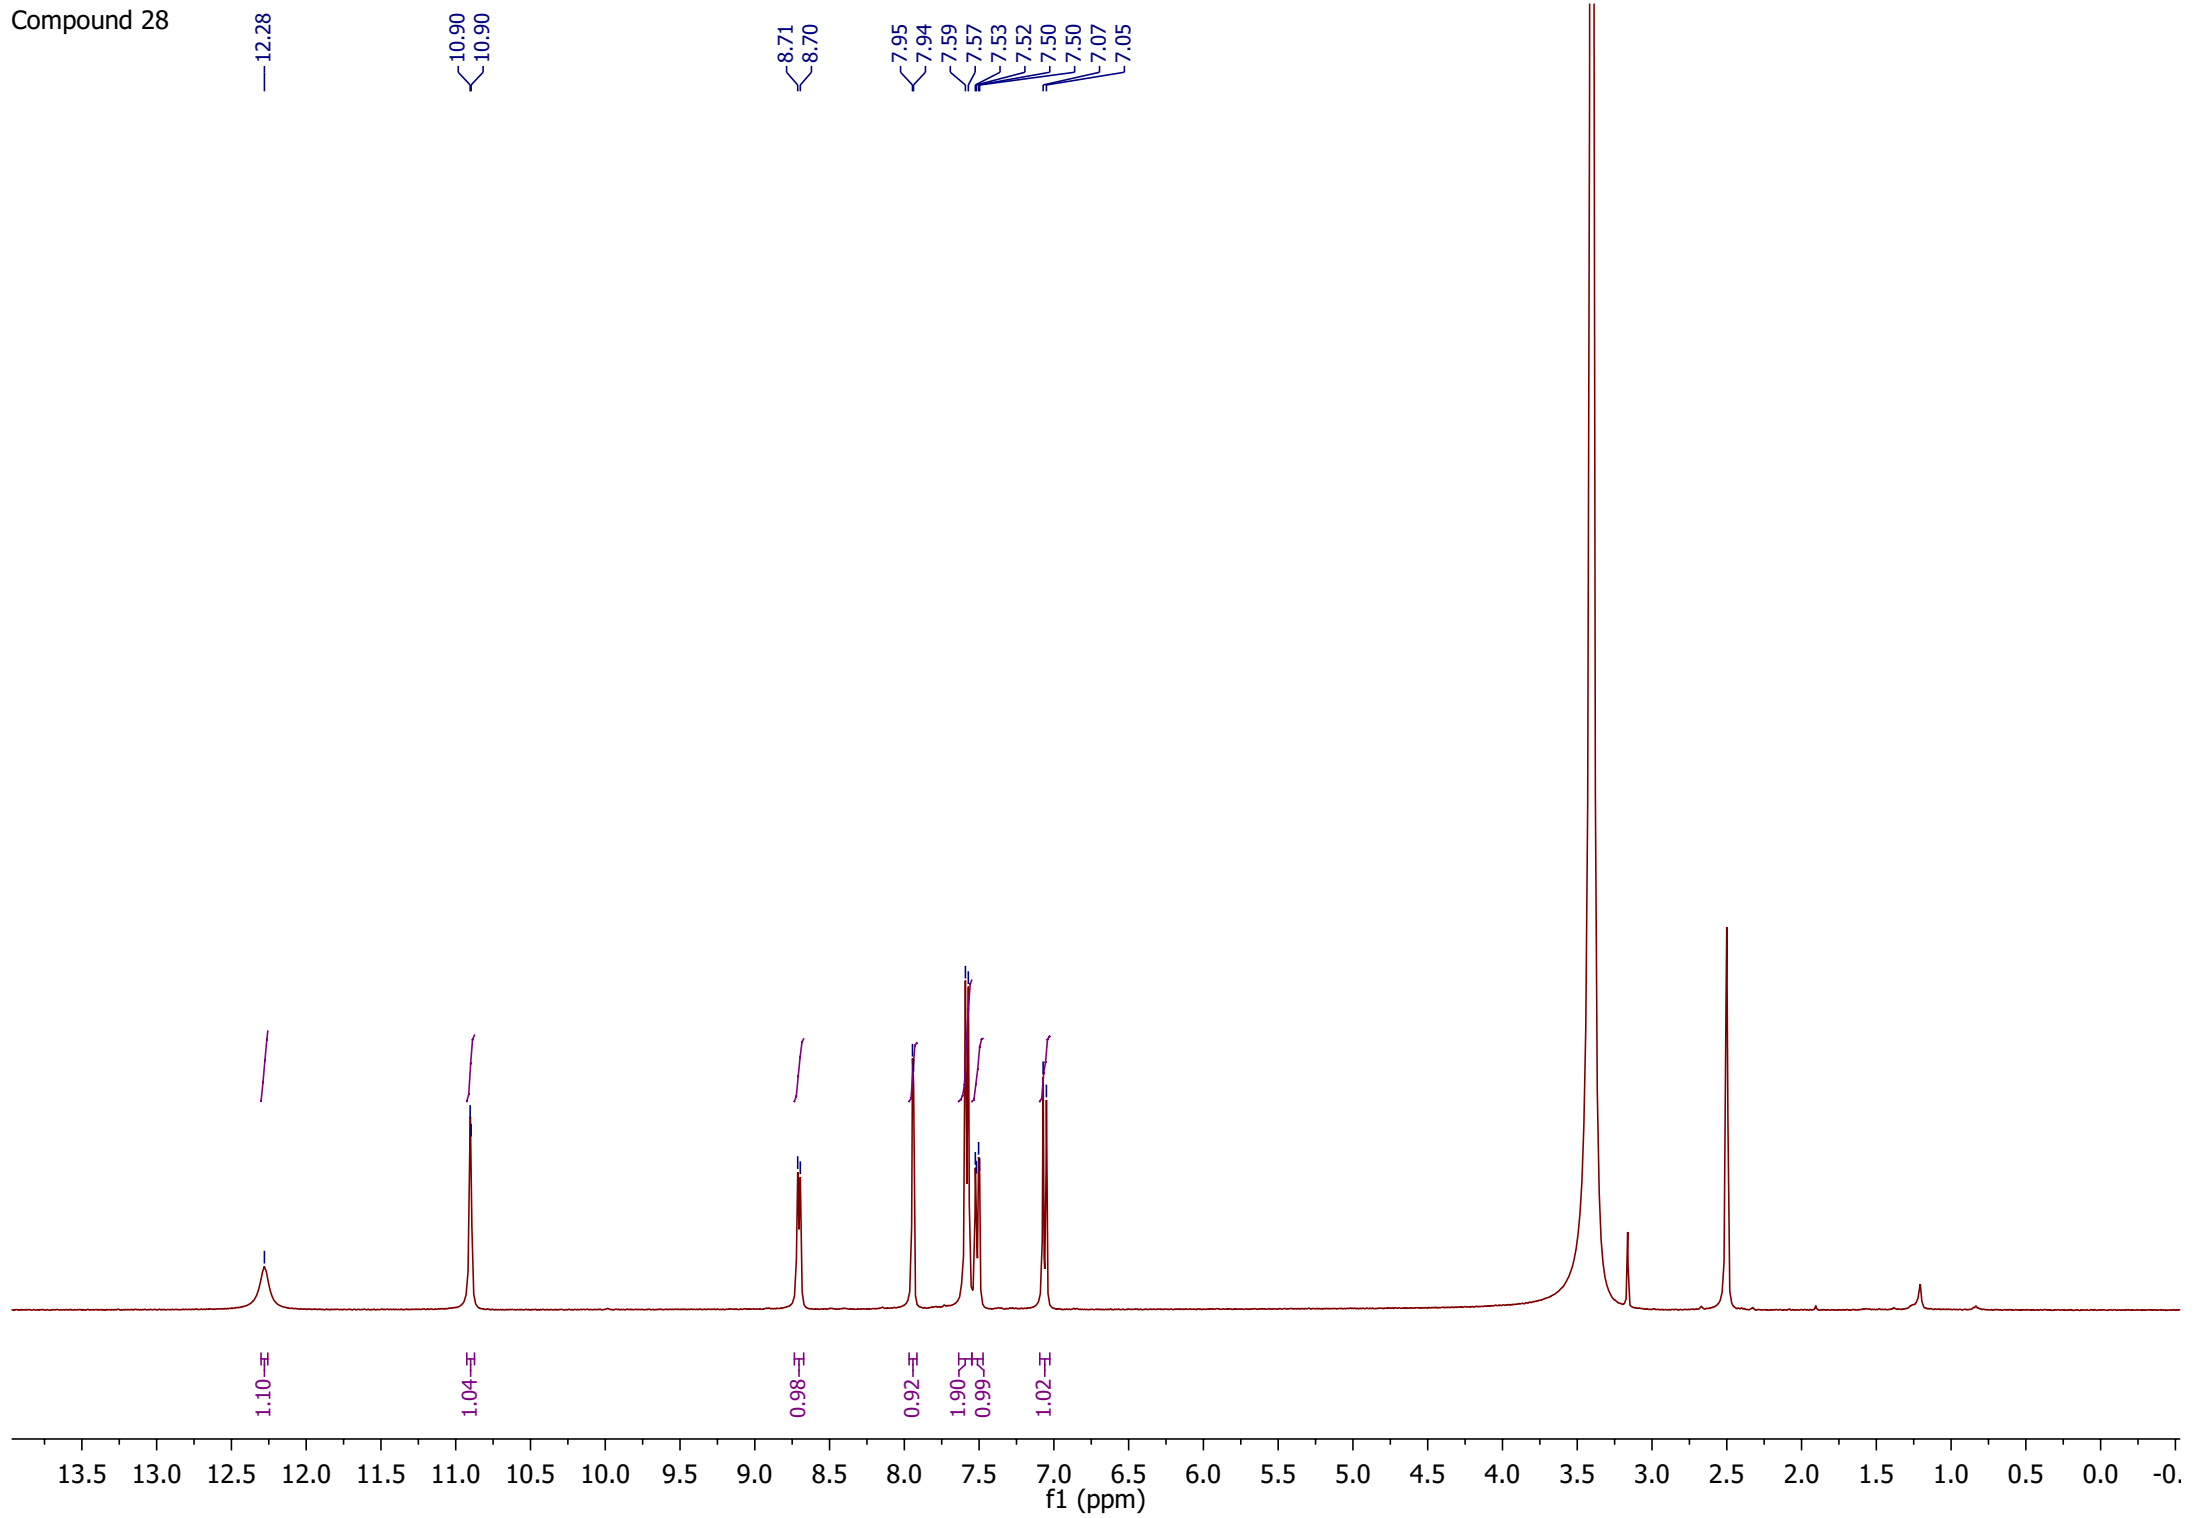

Compound 28

— 163.2  
— 155.9  
— 155.5  
— 153.4  
— 133.7  
— 129.7  
— 127.9  
— 127.3  
— 127.2  
— 125.7  
— 125.7  
— 125.4  
— 125.4  
— 125.2  
— 123.6  
— 122.5  
— 122.3  
— 122.2  
— 119.8  
— 119.5  
— 119.2  
— 116.7  
— 116.5

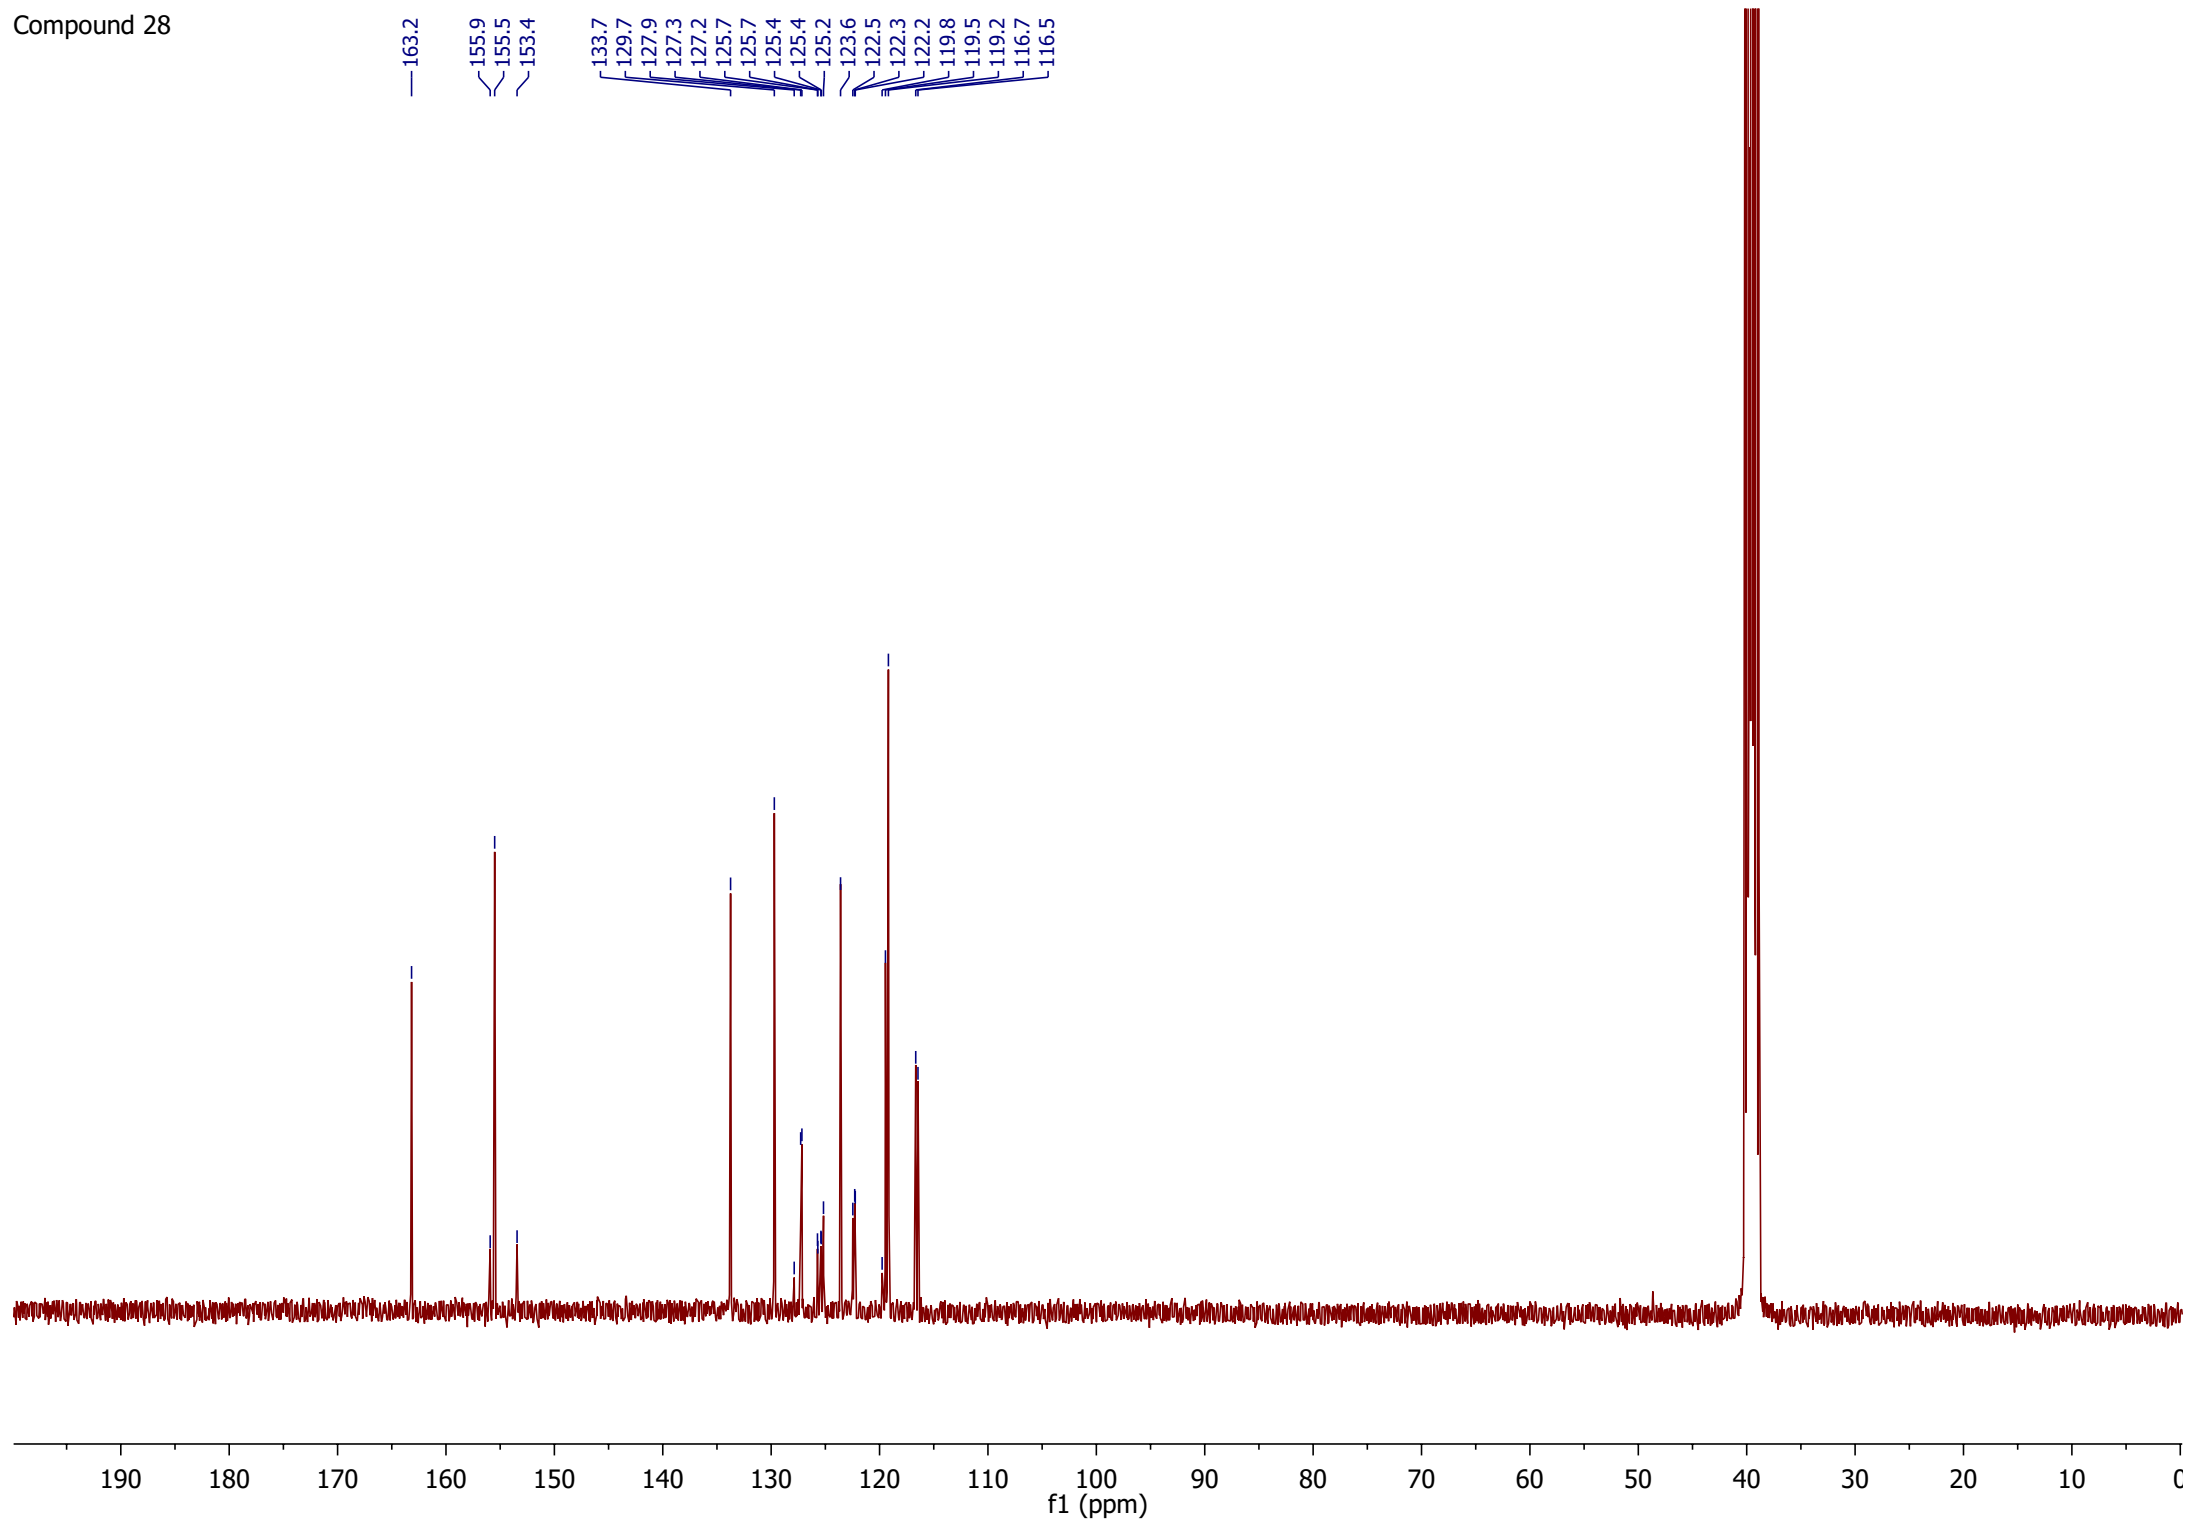

Compound 29

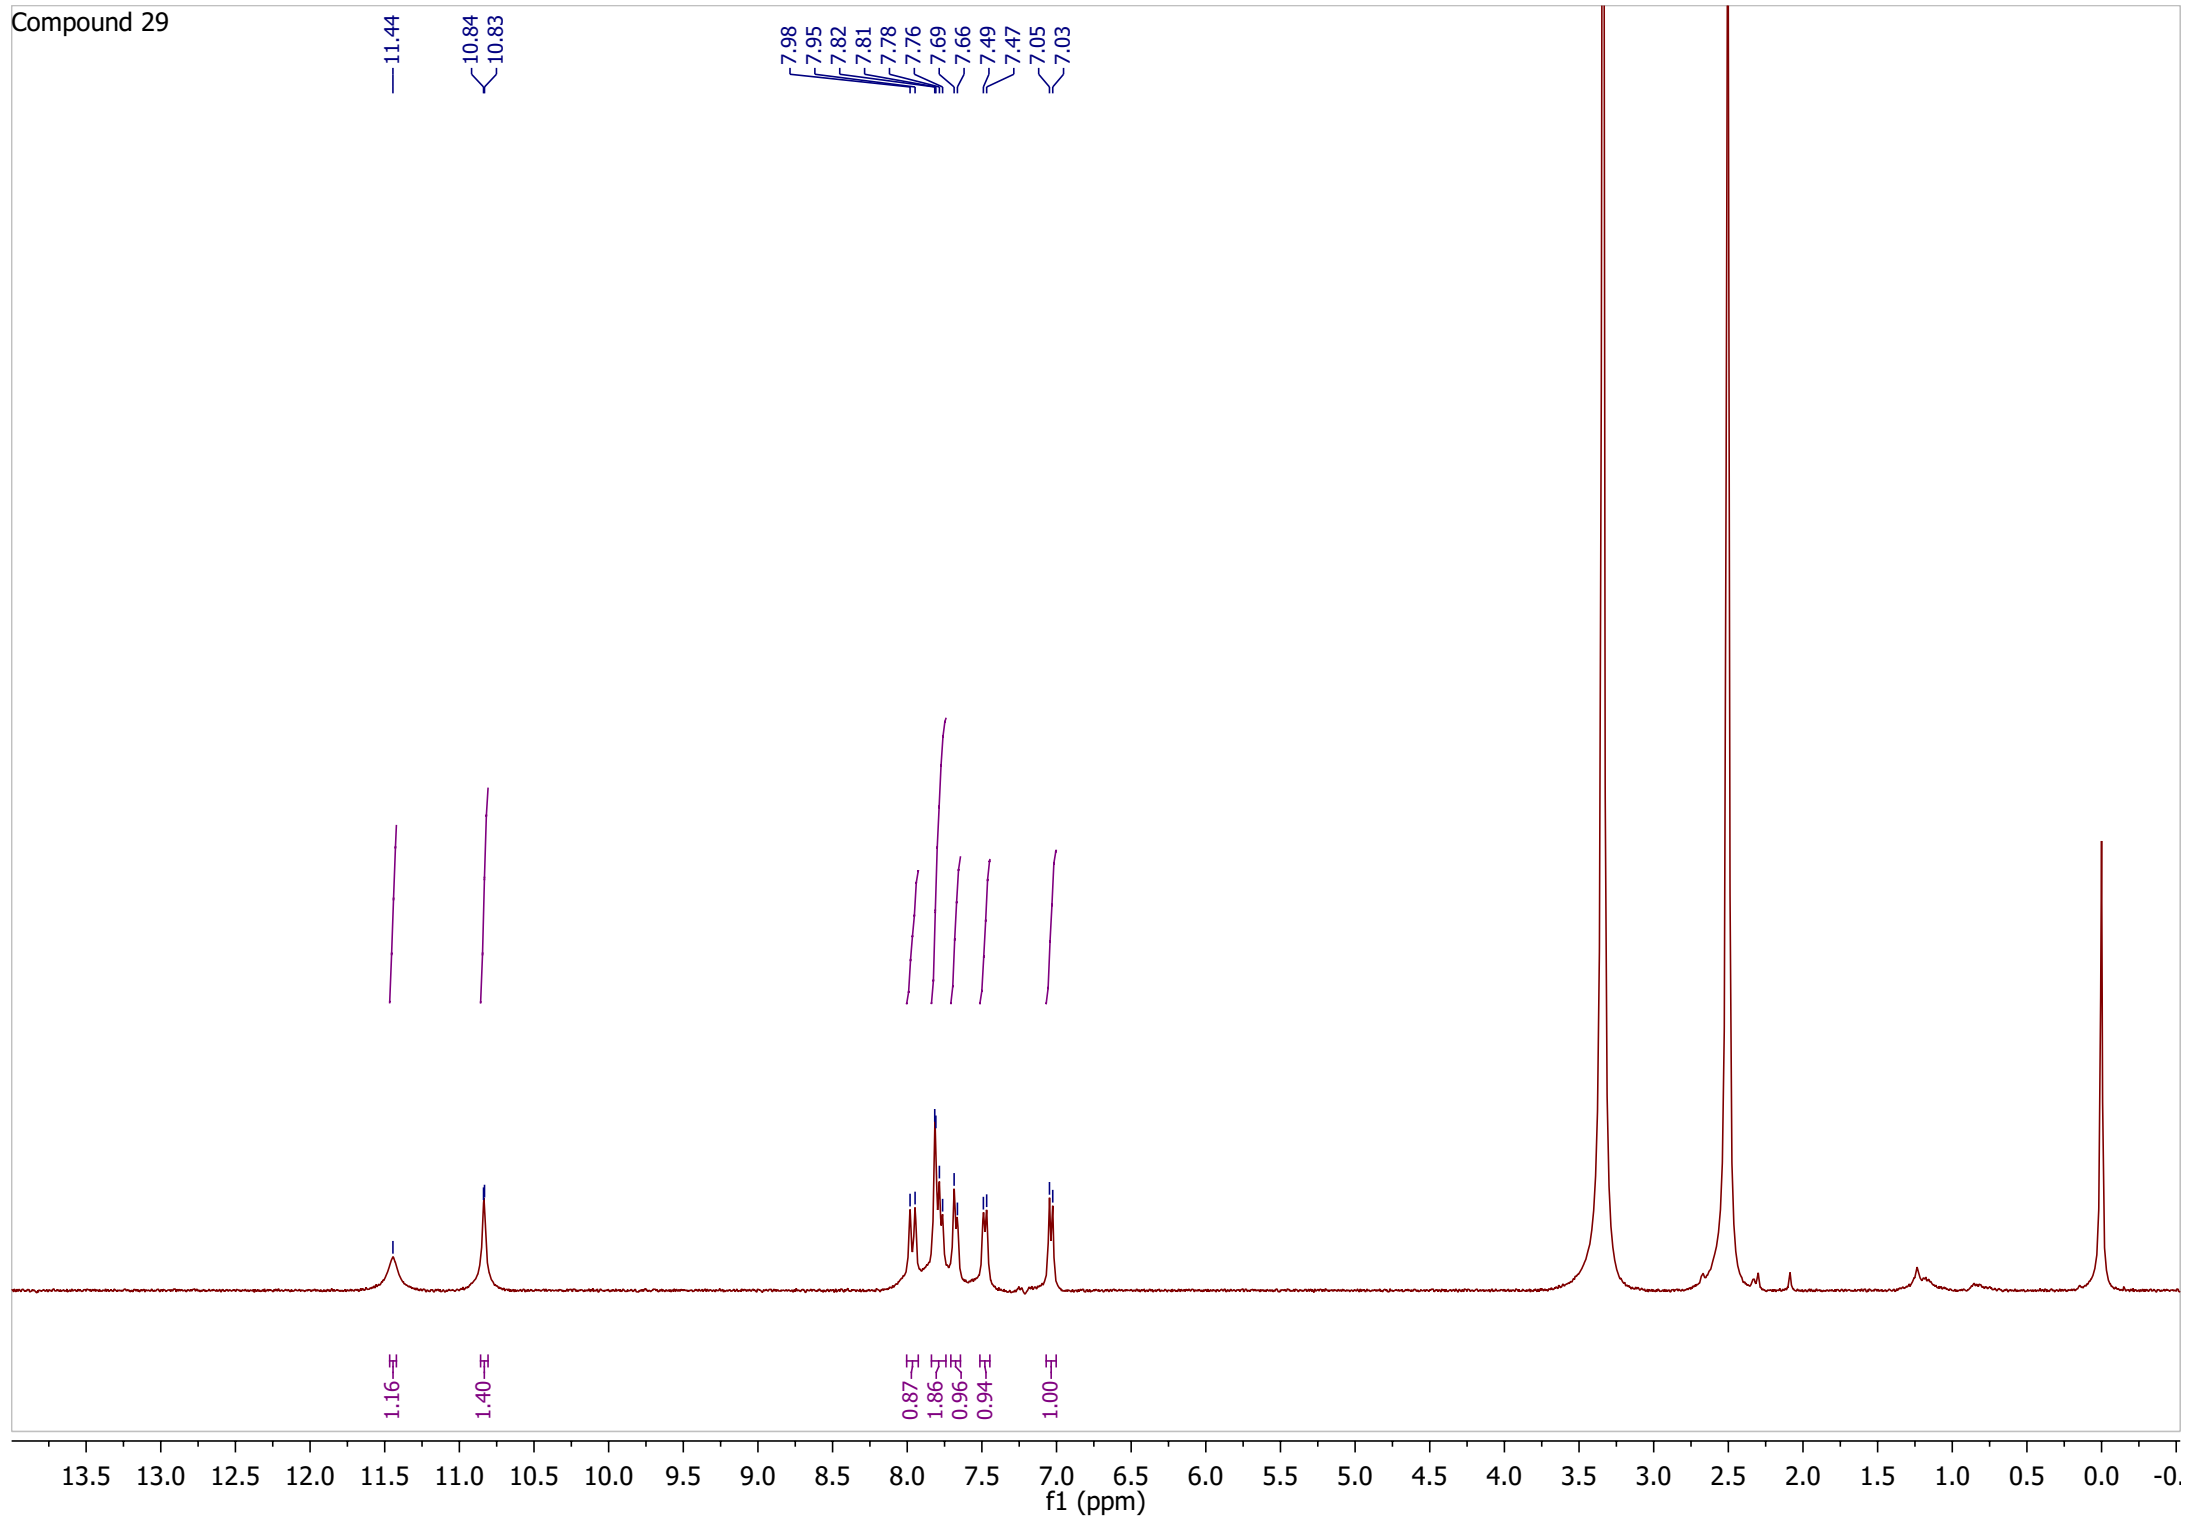



Compound 29

165.1  
160.3  
157.9  
155.9  
144.2  
144.1  
133.1  
128.8  
127.9  
127.8  
124.1  
122.9  
121.4  
120.8  
119.0  
115.9  
115.8  
111.5  
111.4  
111.2  
111.1  
107.9  
107.7

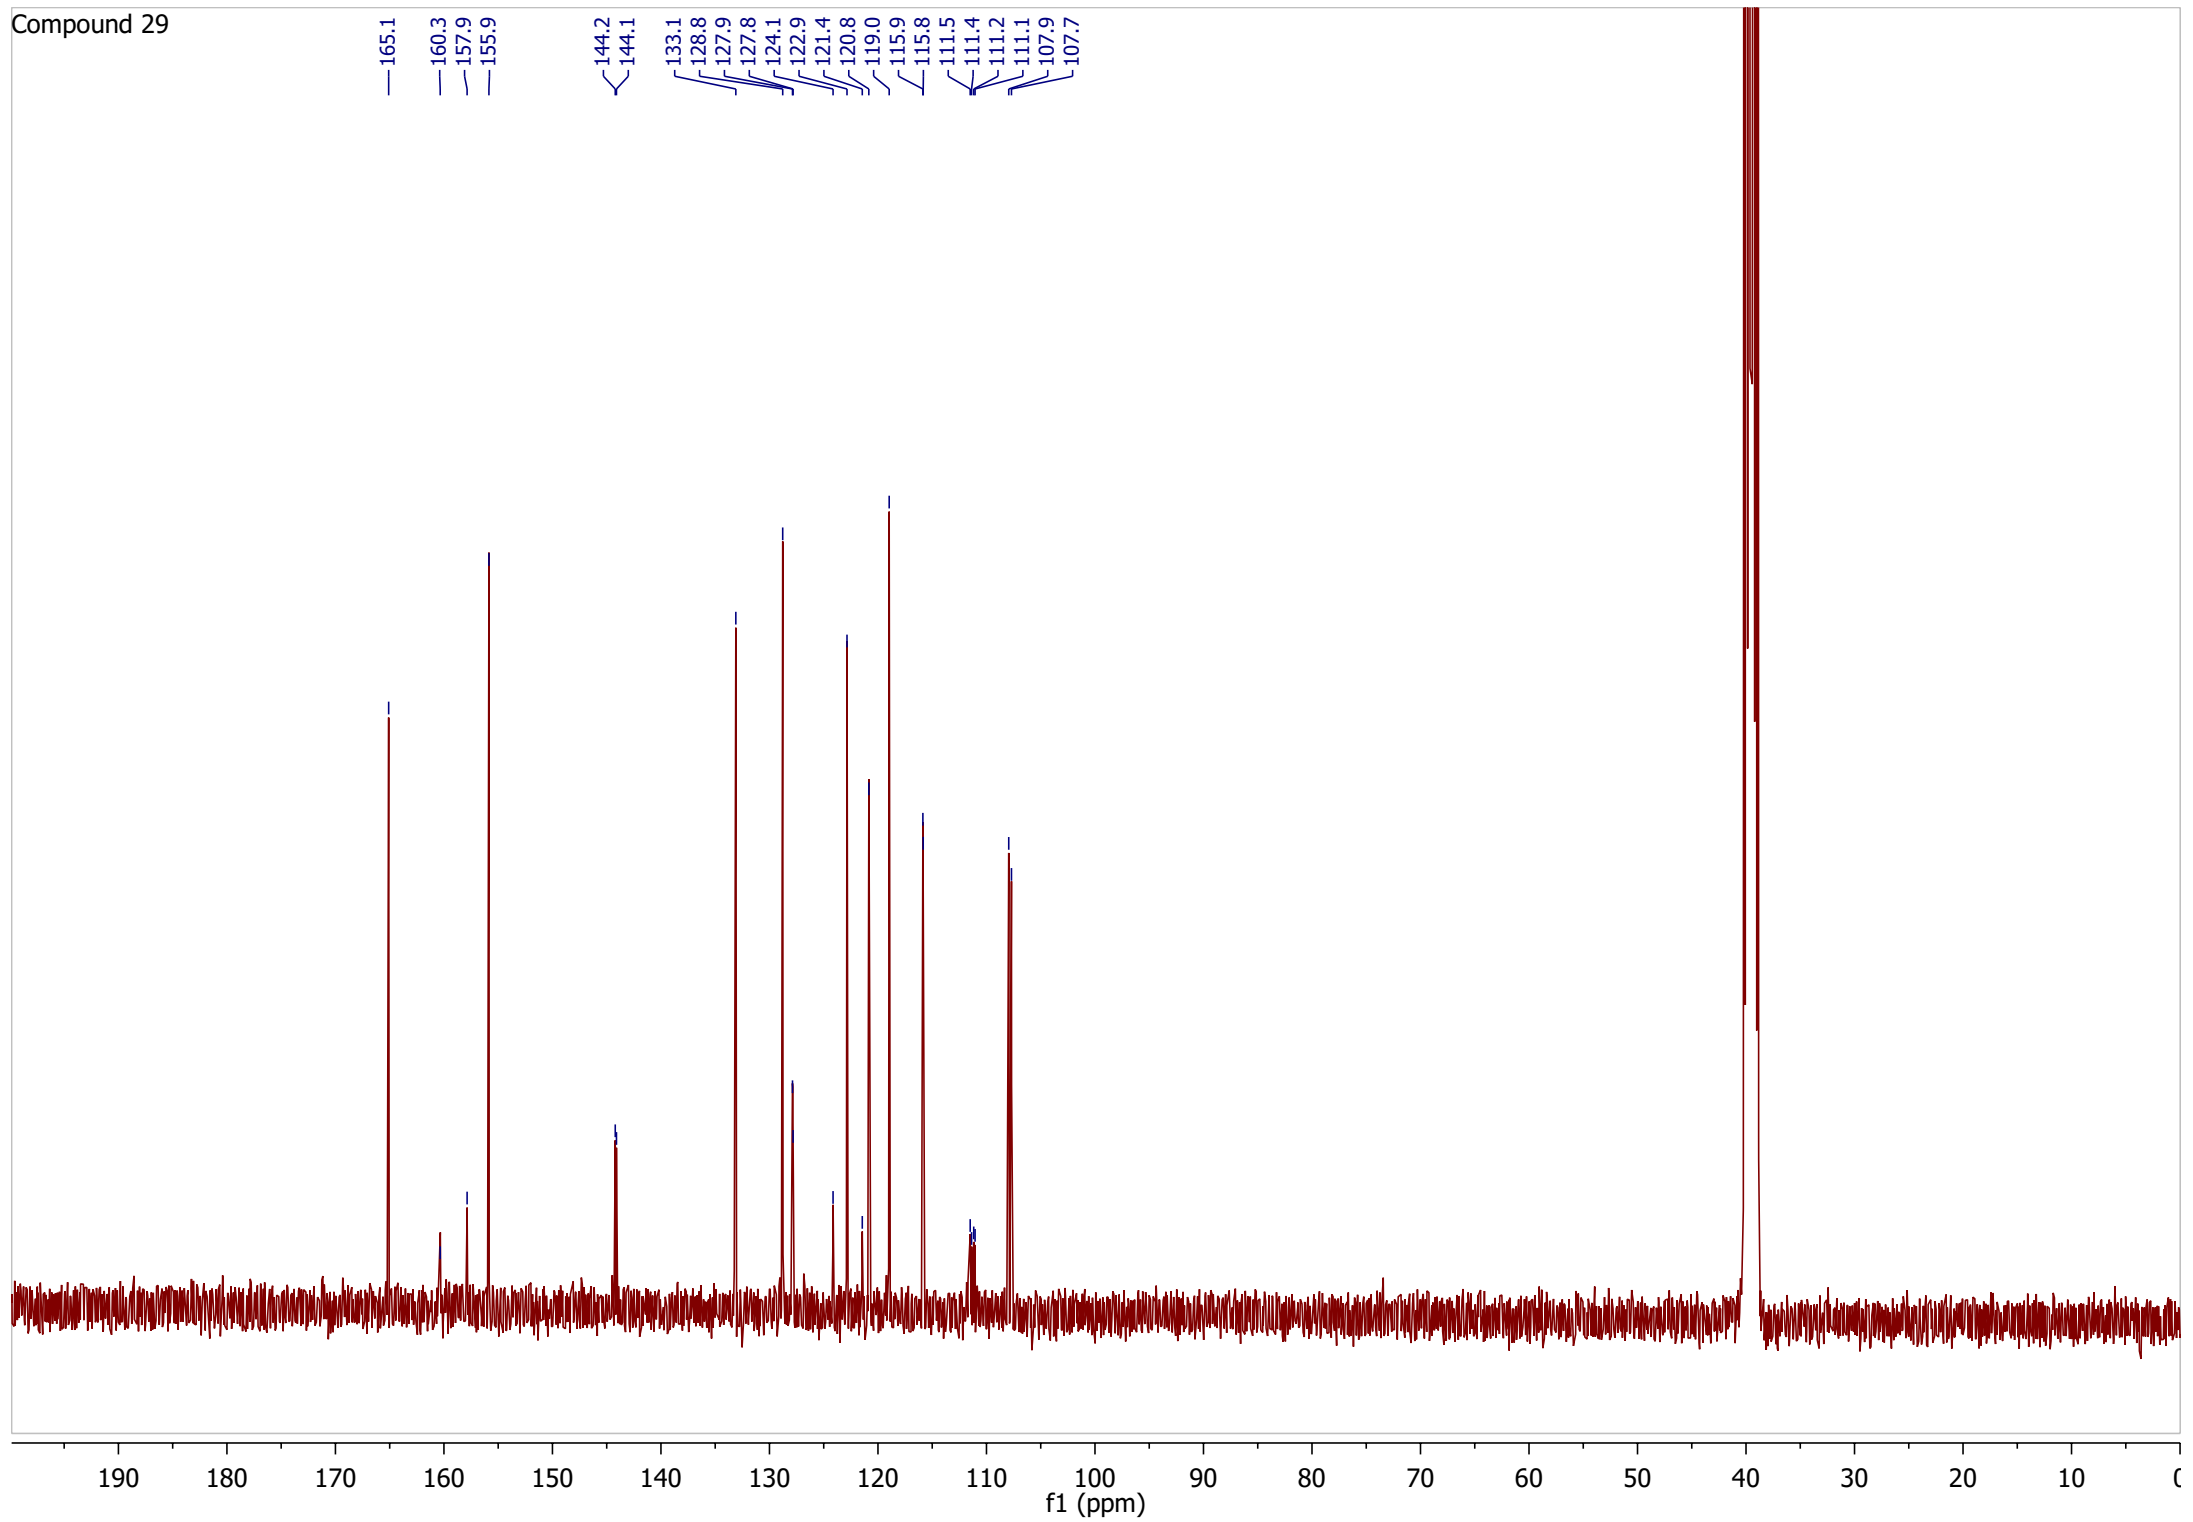

Compound 30

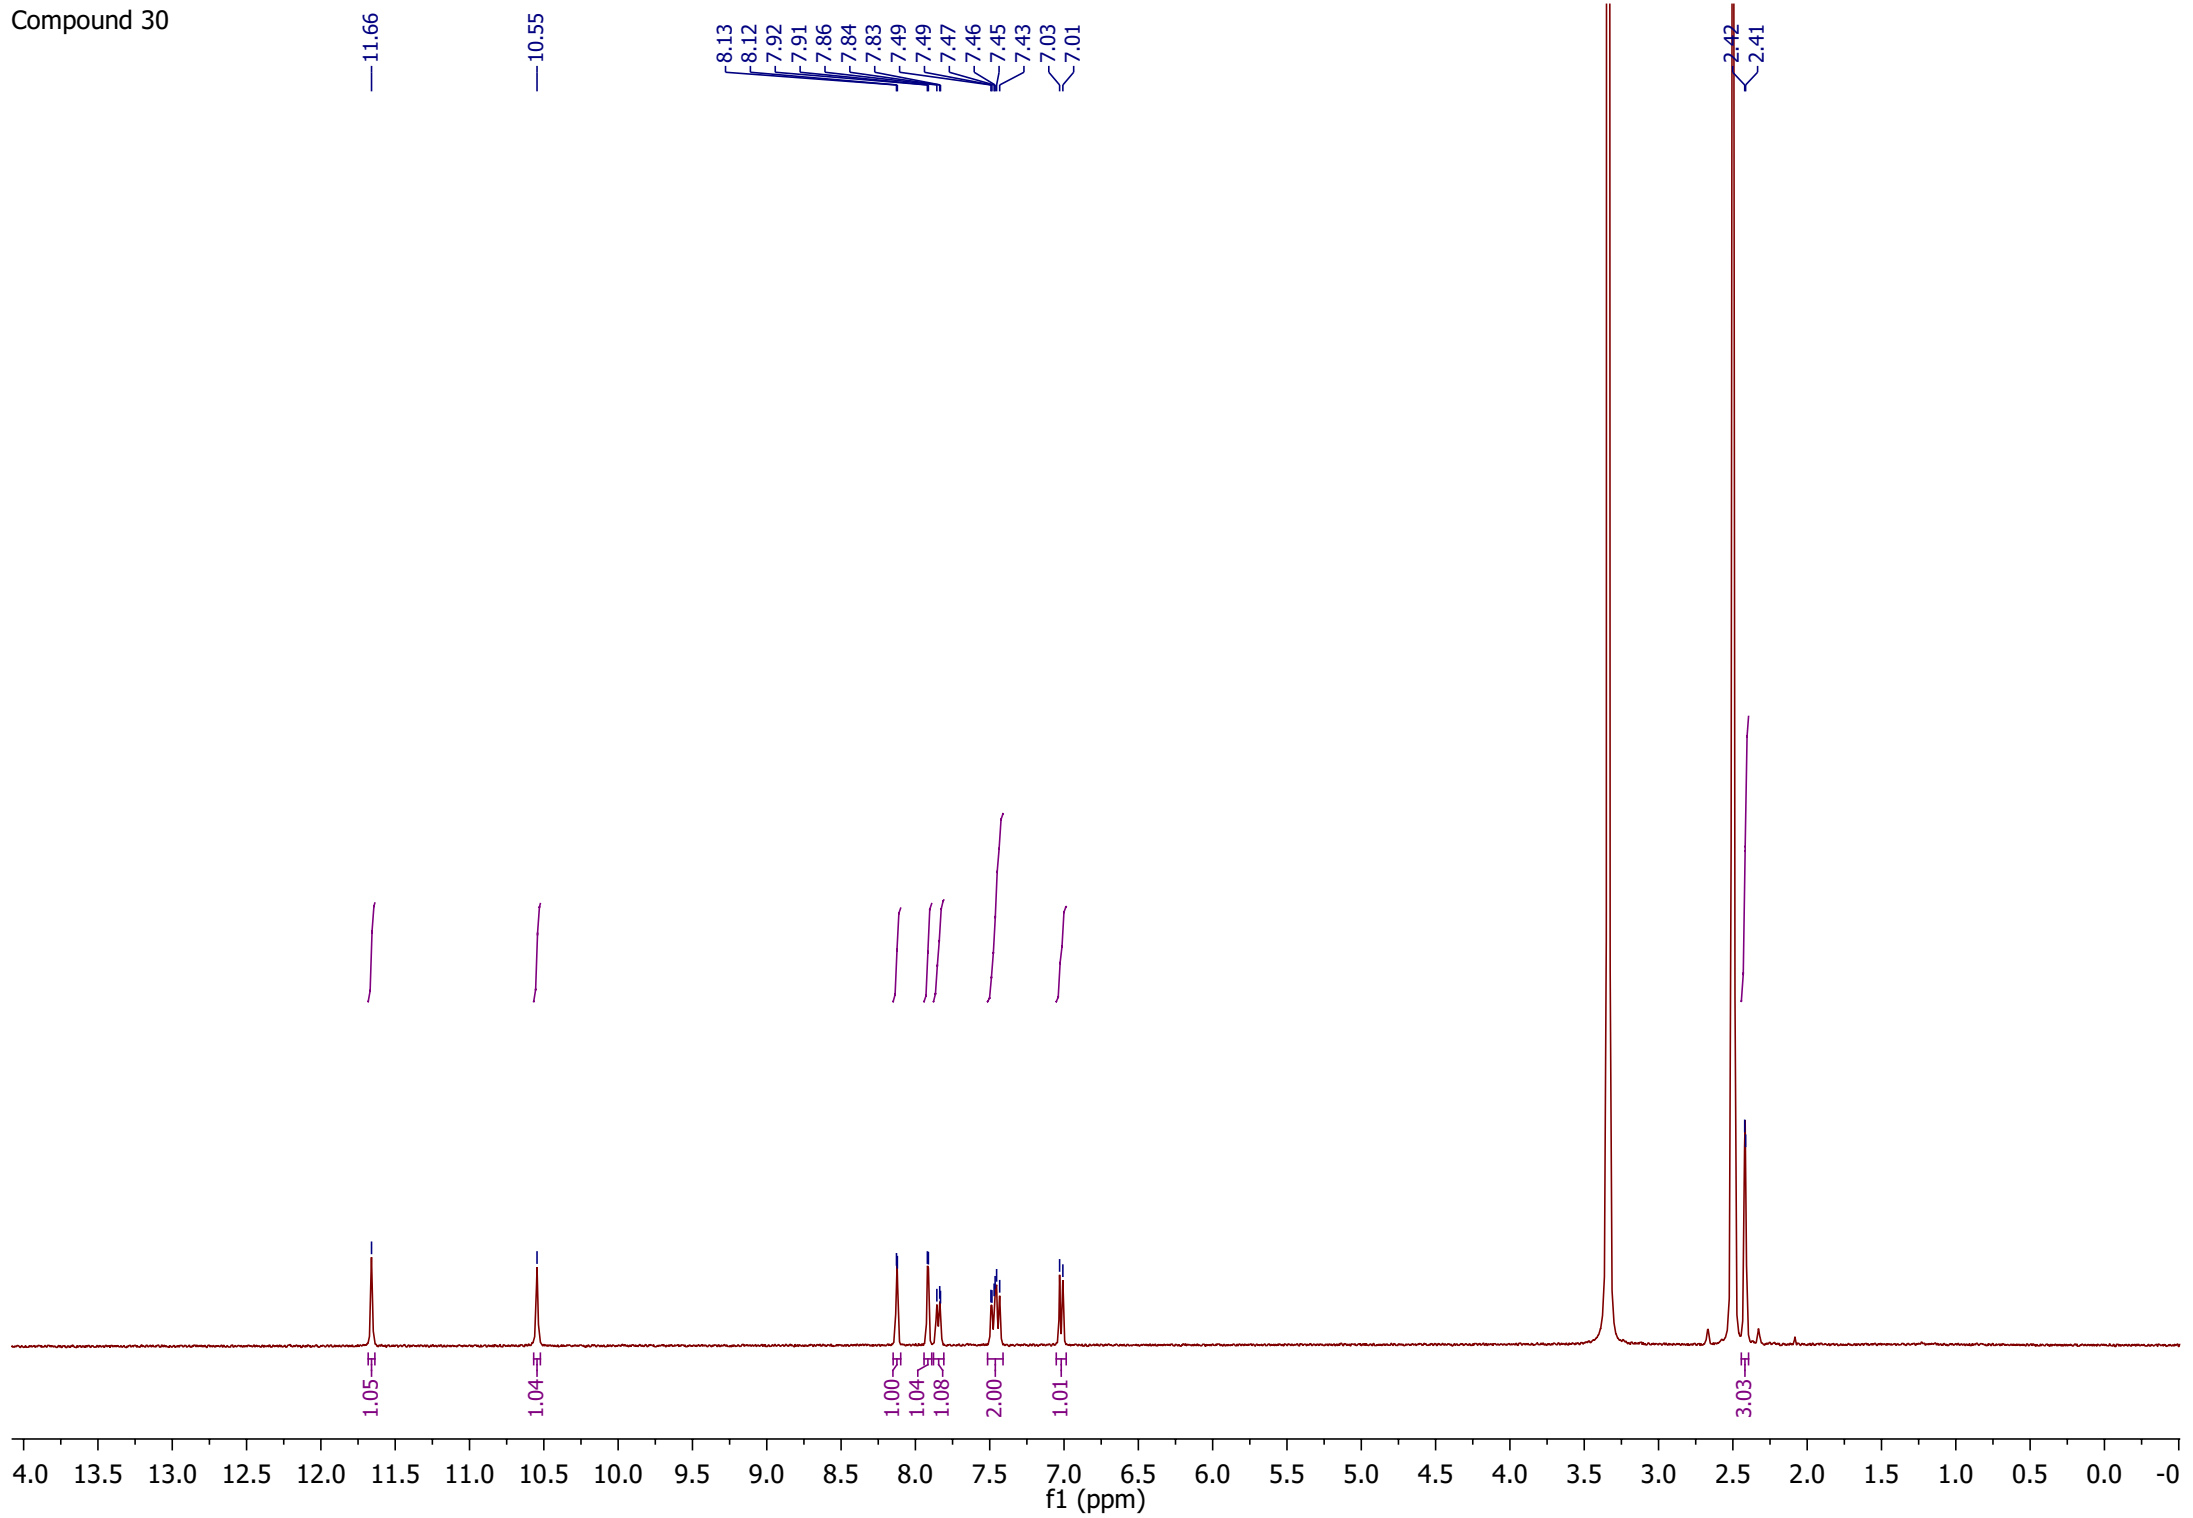

Compound 30

— 165.3  
— 156.8  
136.4  
133.2  
132.7  
131.4  
131.4  
131.4  
128.5  
128.4  
128.0  
127.7  
127.4  
127.1  
125.8  
124.1  
123.1  
122.7  
119.7  
119.1  
117.8  
117.7  
117.7  
117.6

18.3  
18.3  
18.3  
18.2

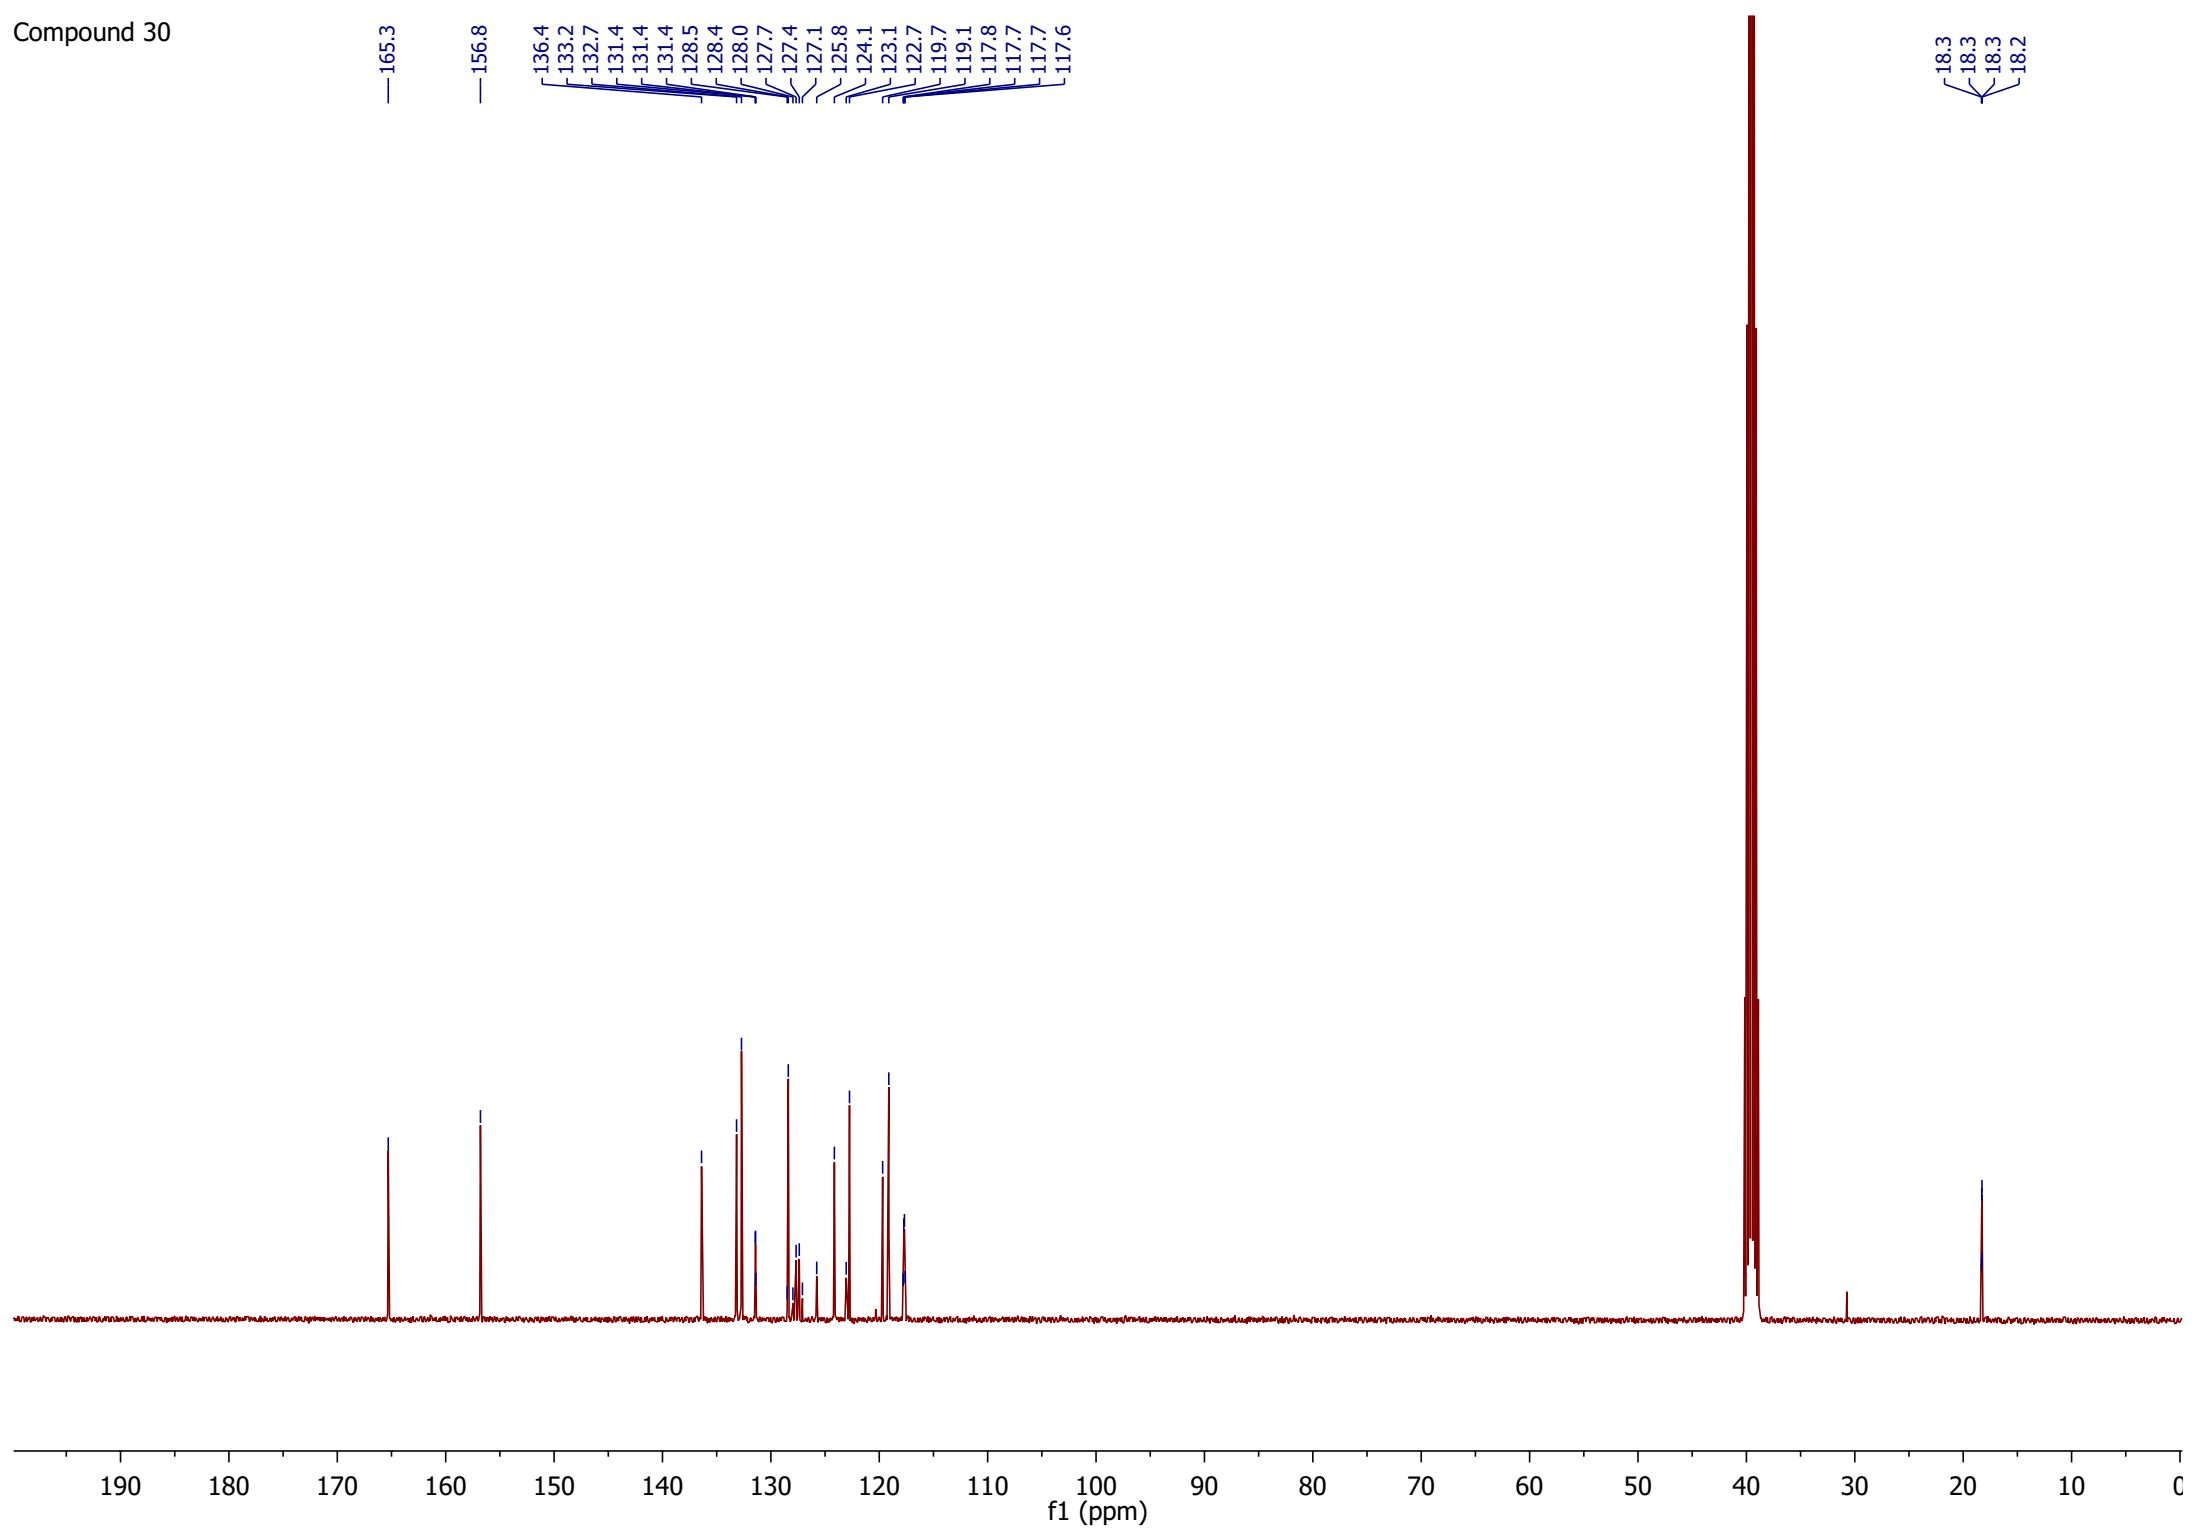

Compound 31

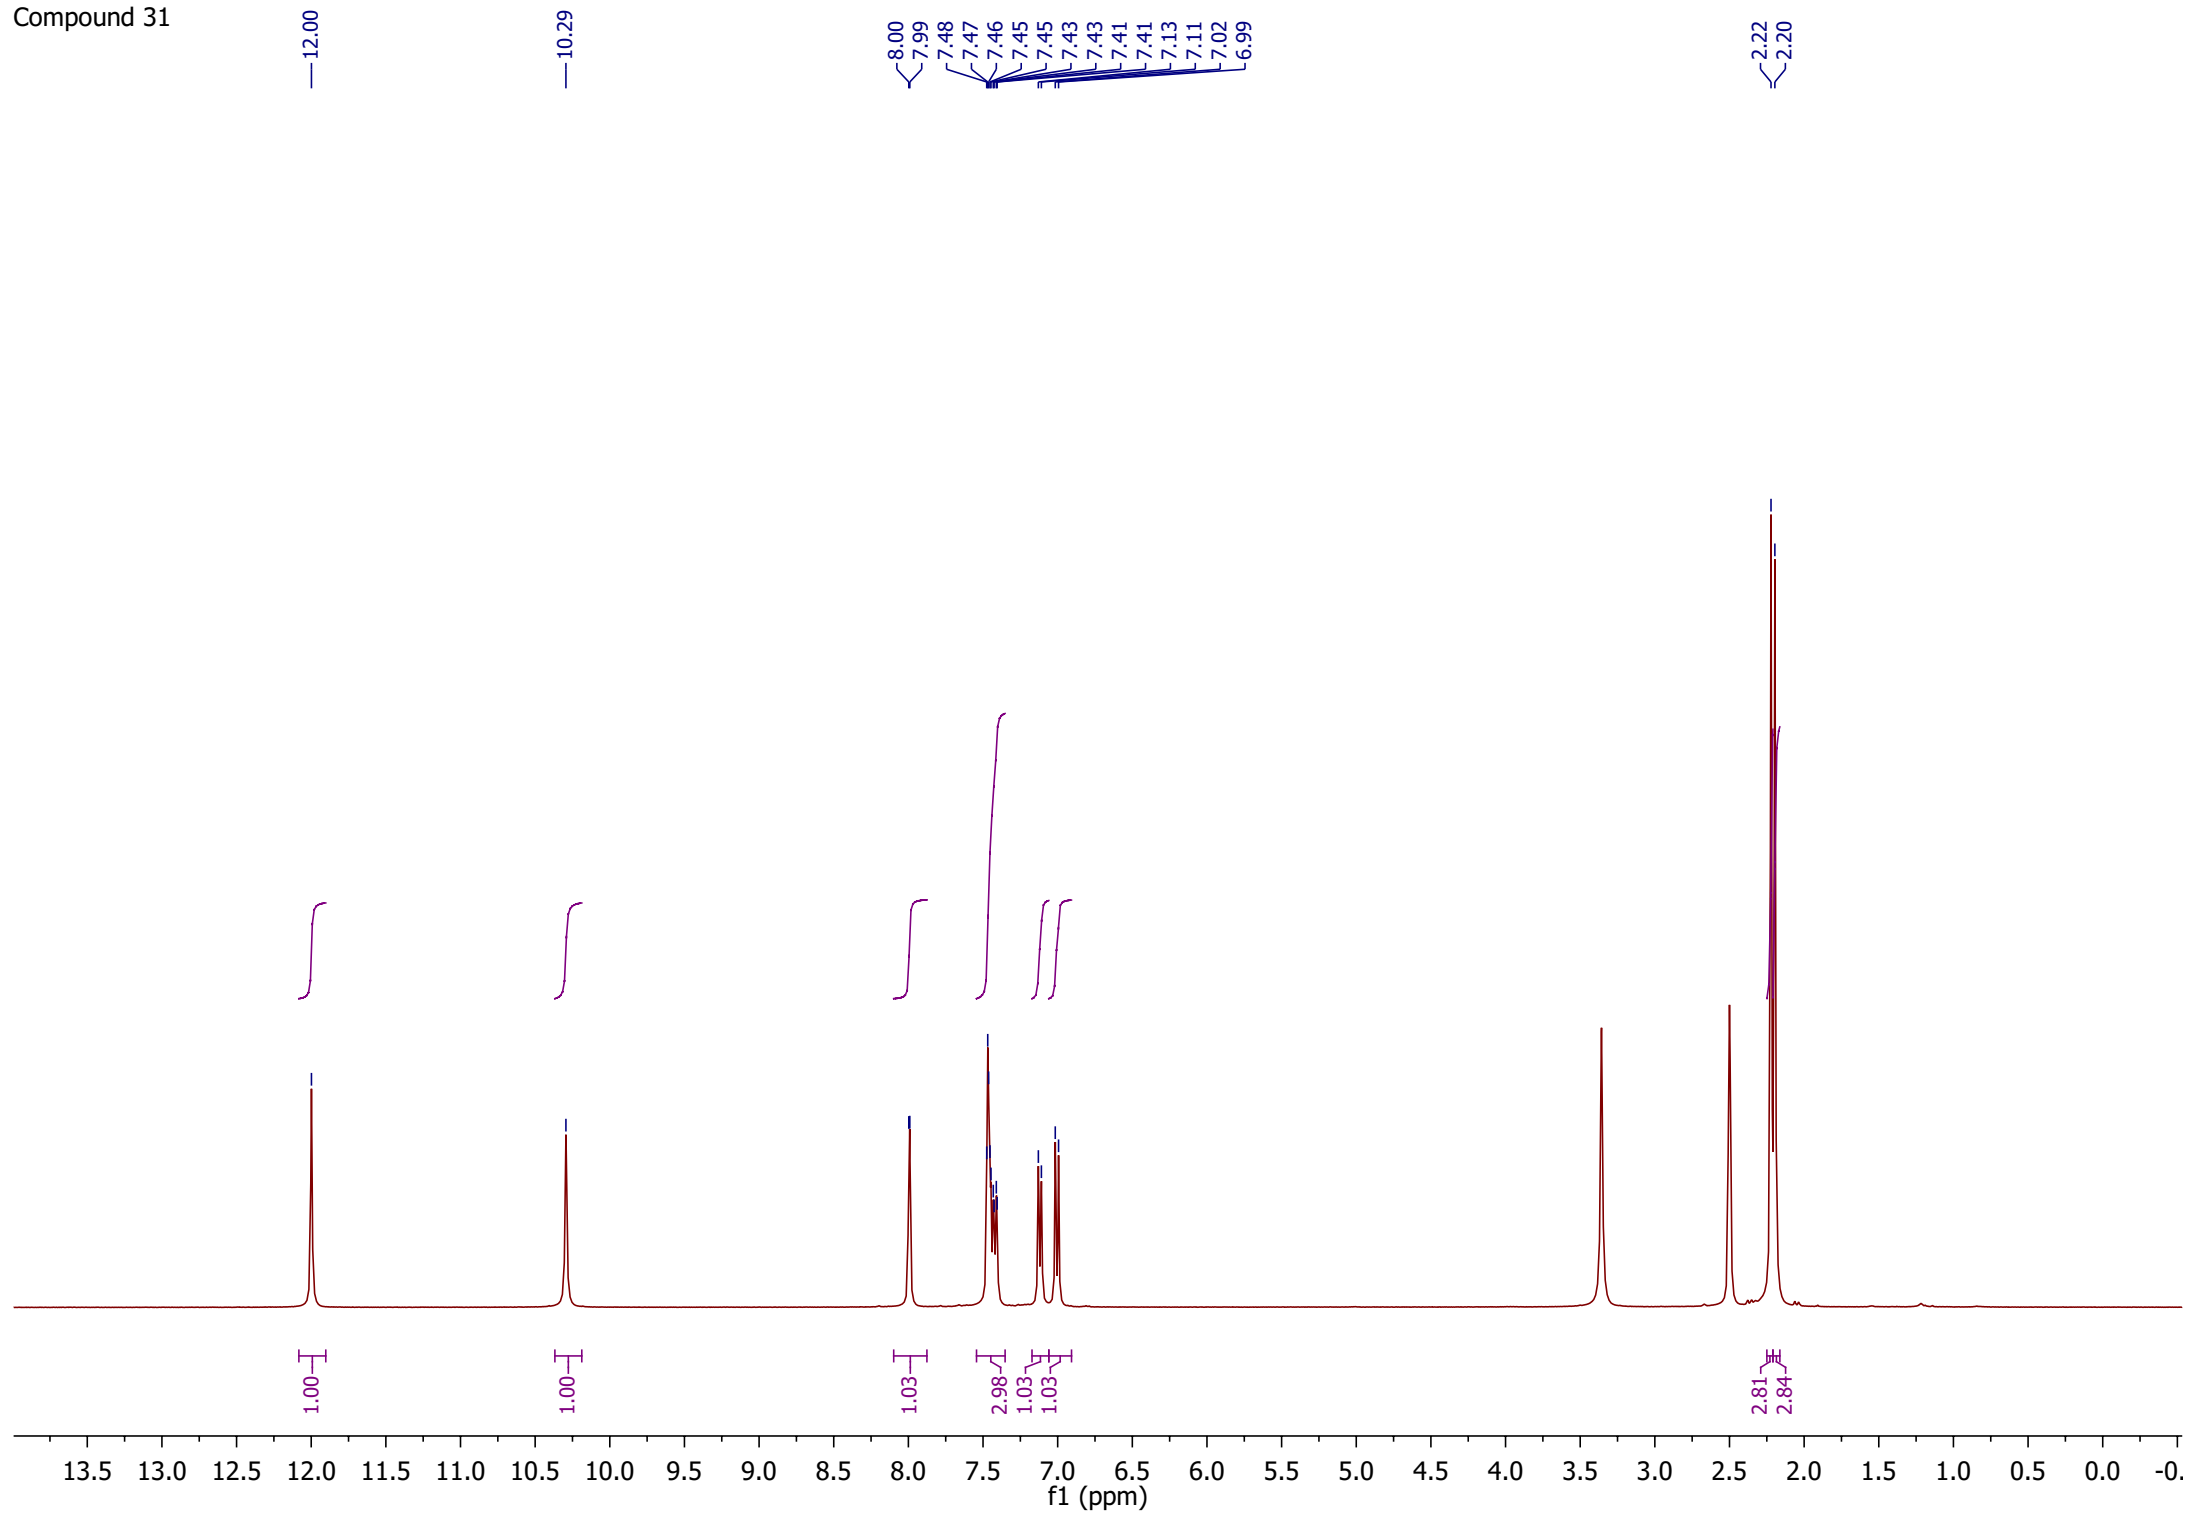

Compound 31

— 164.9

— 157.2

— 136.5

— 135.6

— 133.1

— 132.3

— 129.7

— 128.3

— 122.7

— 122.1

— 119.2

— 119.2

— 118.4

— 19.6

— 18.9

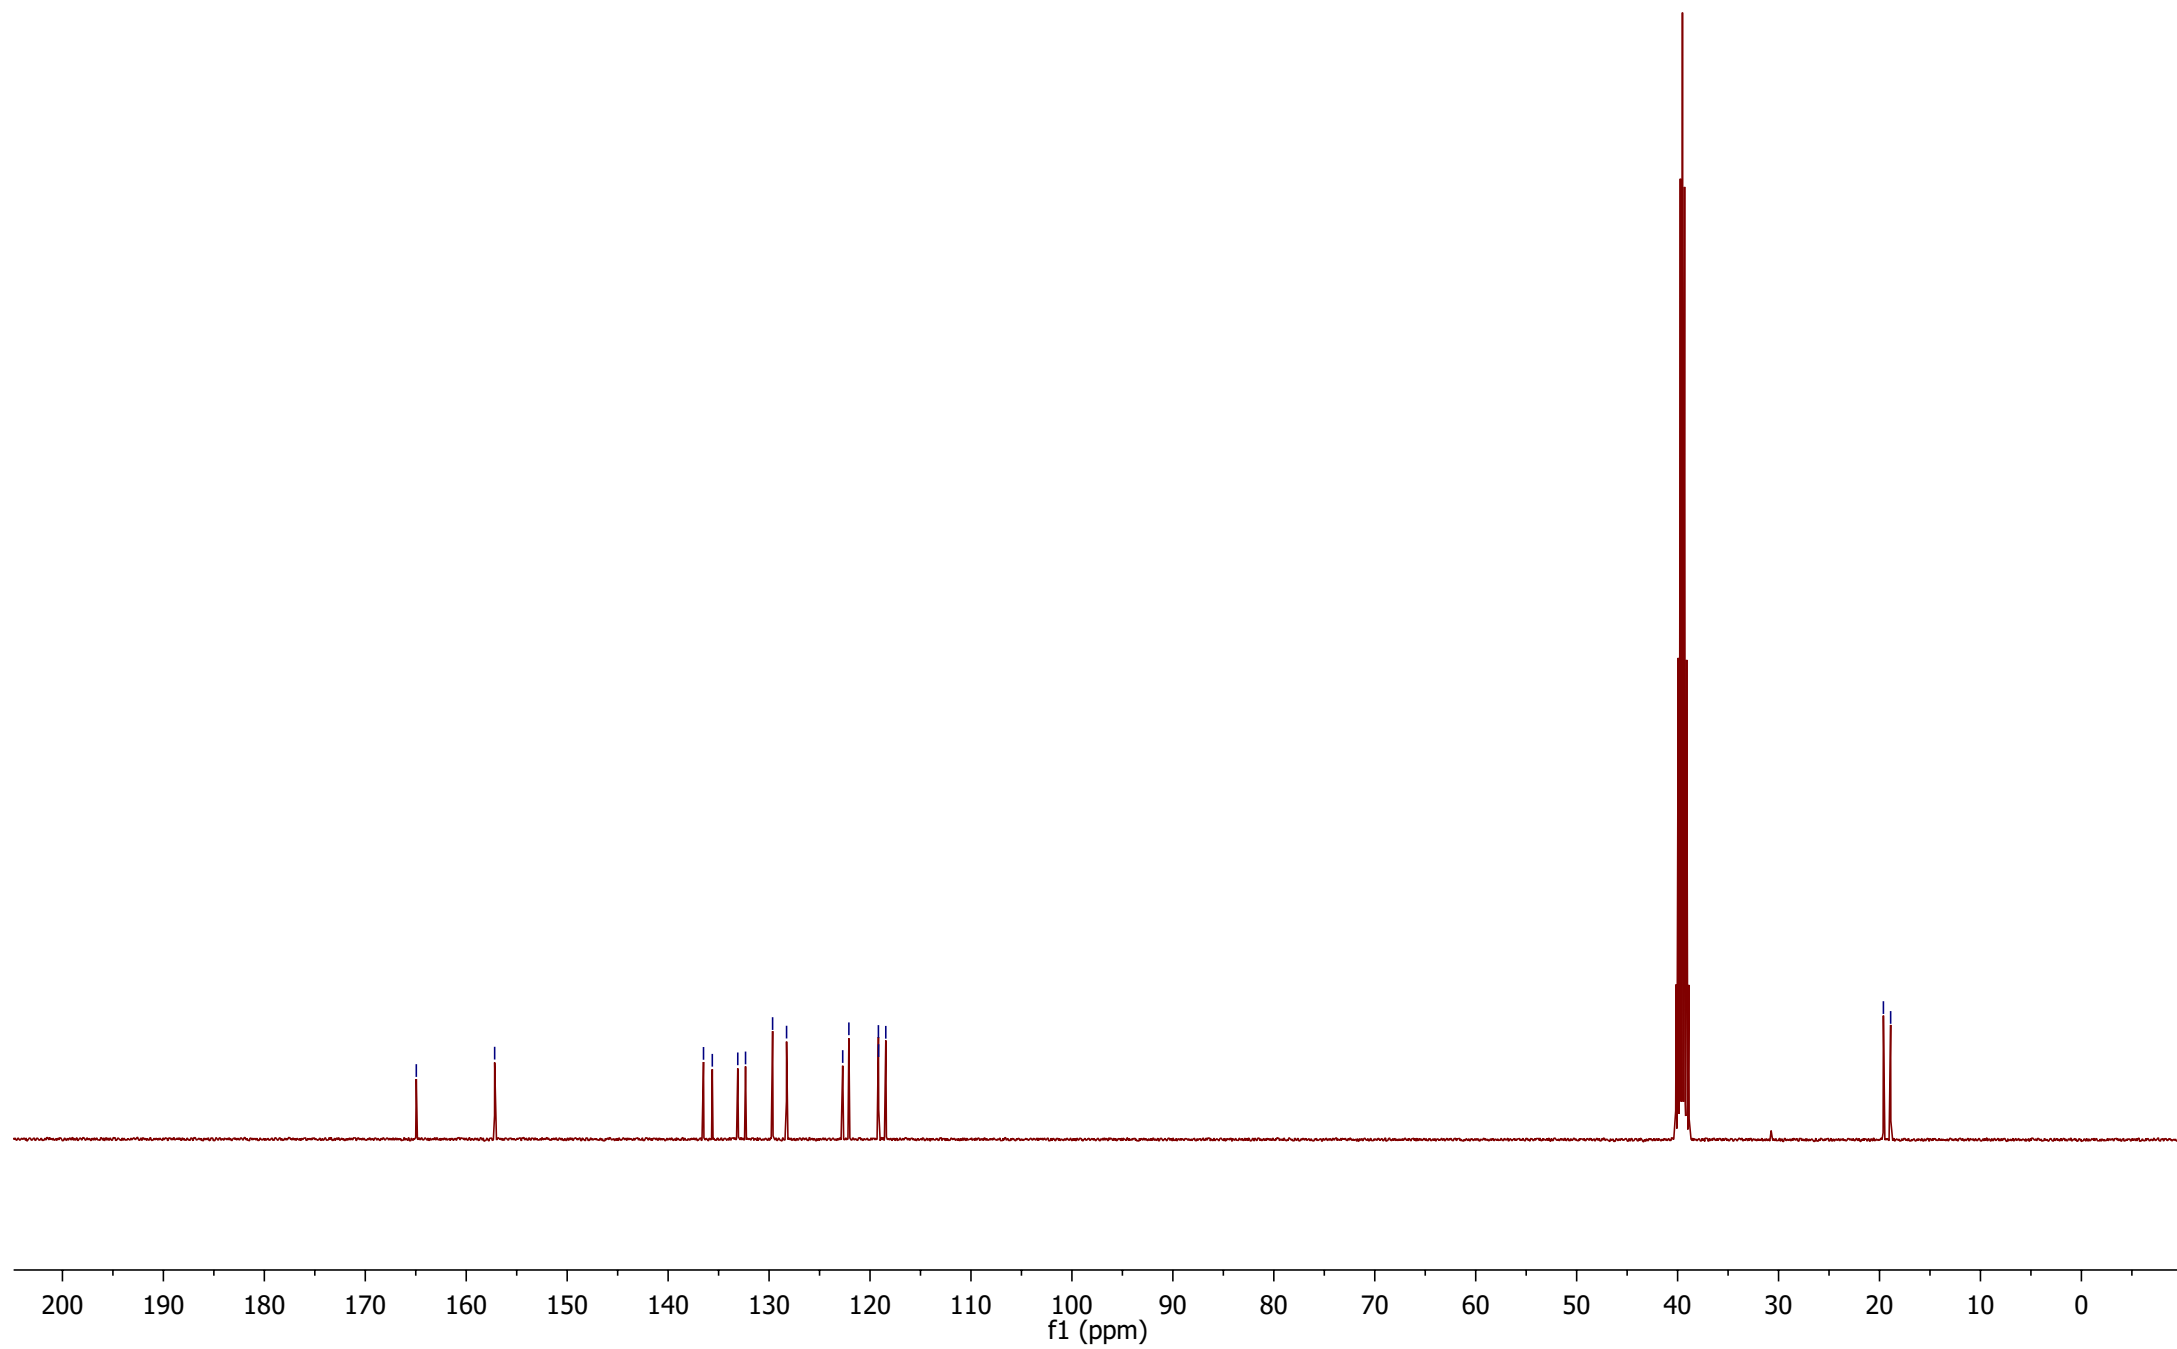

Compound 32

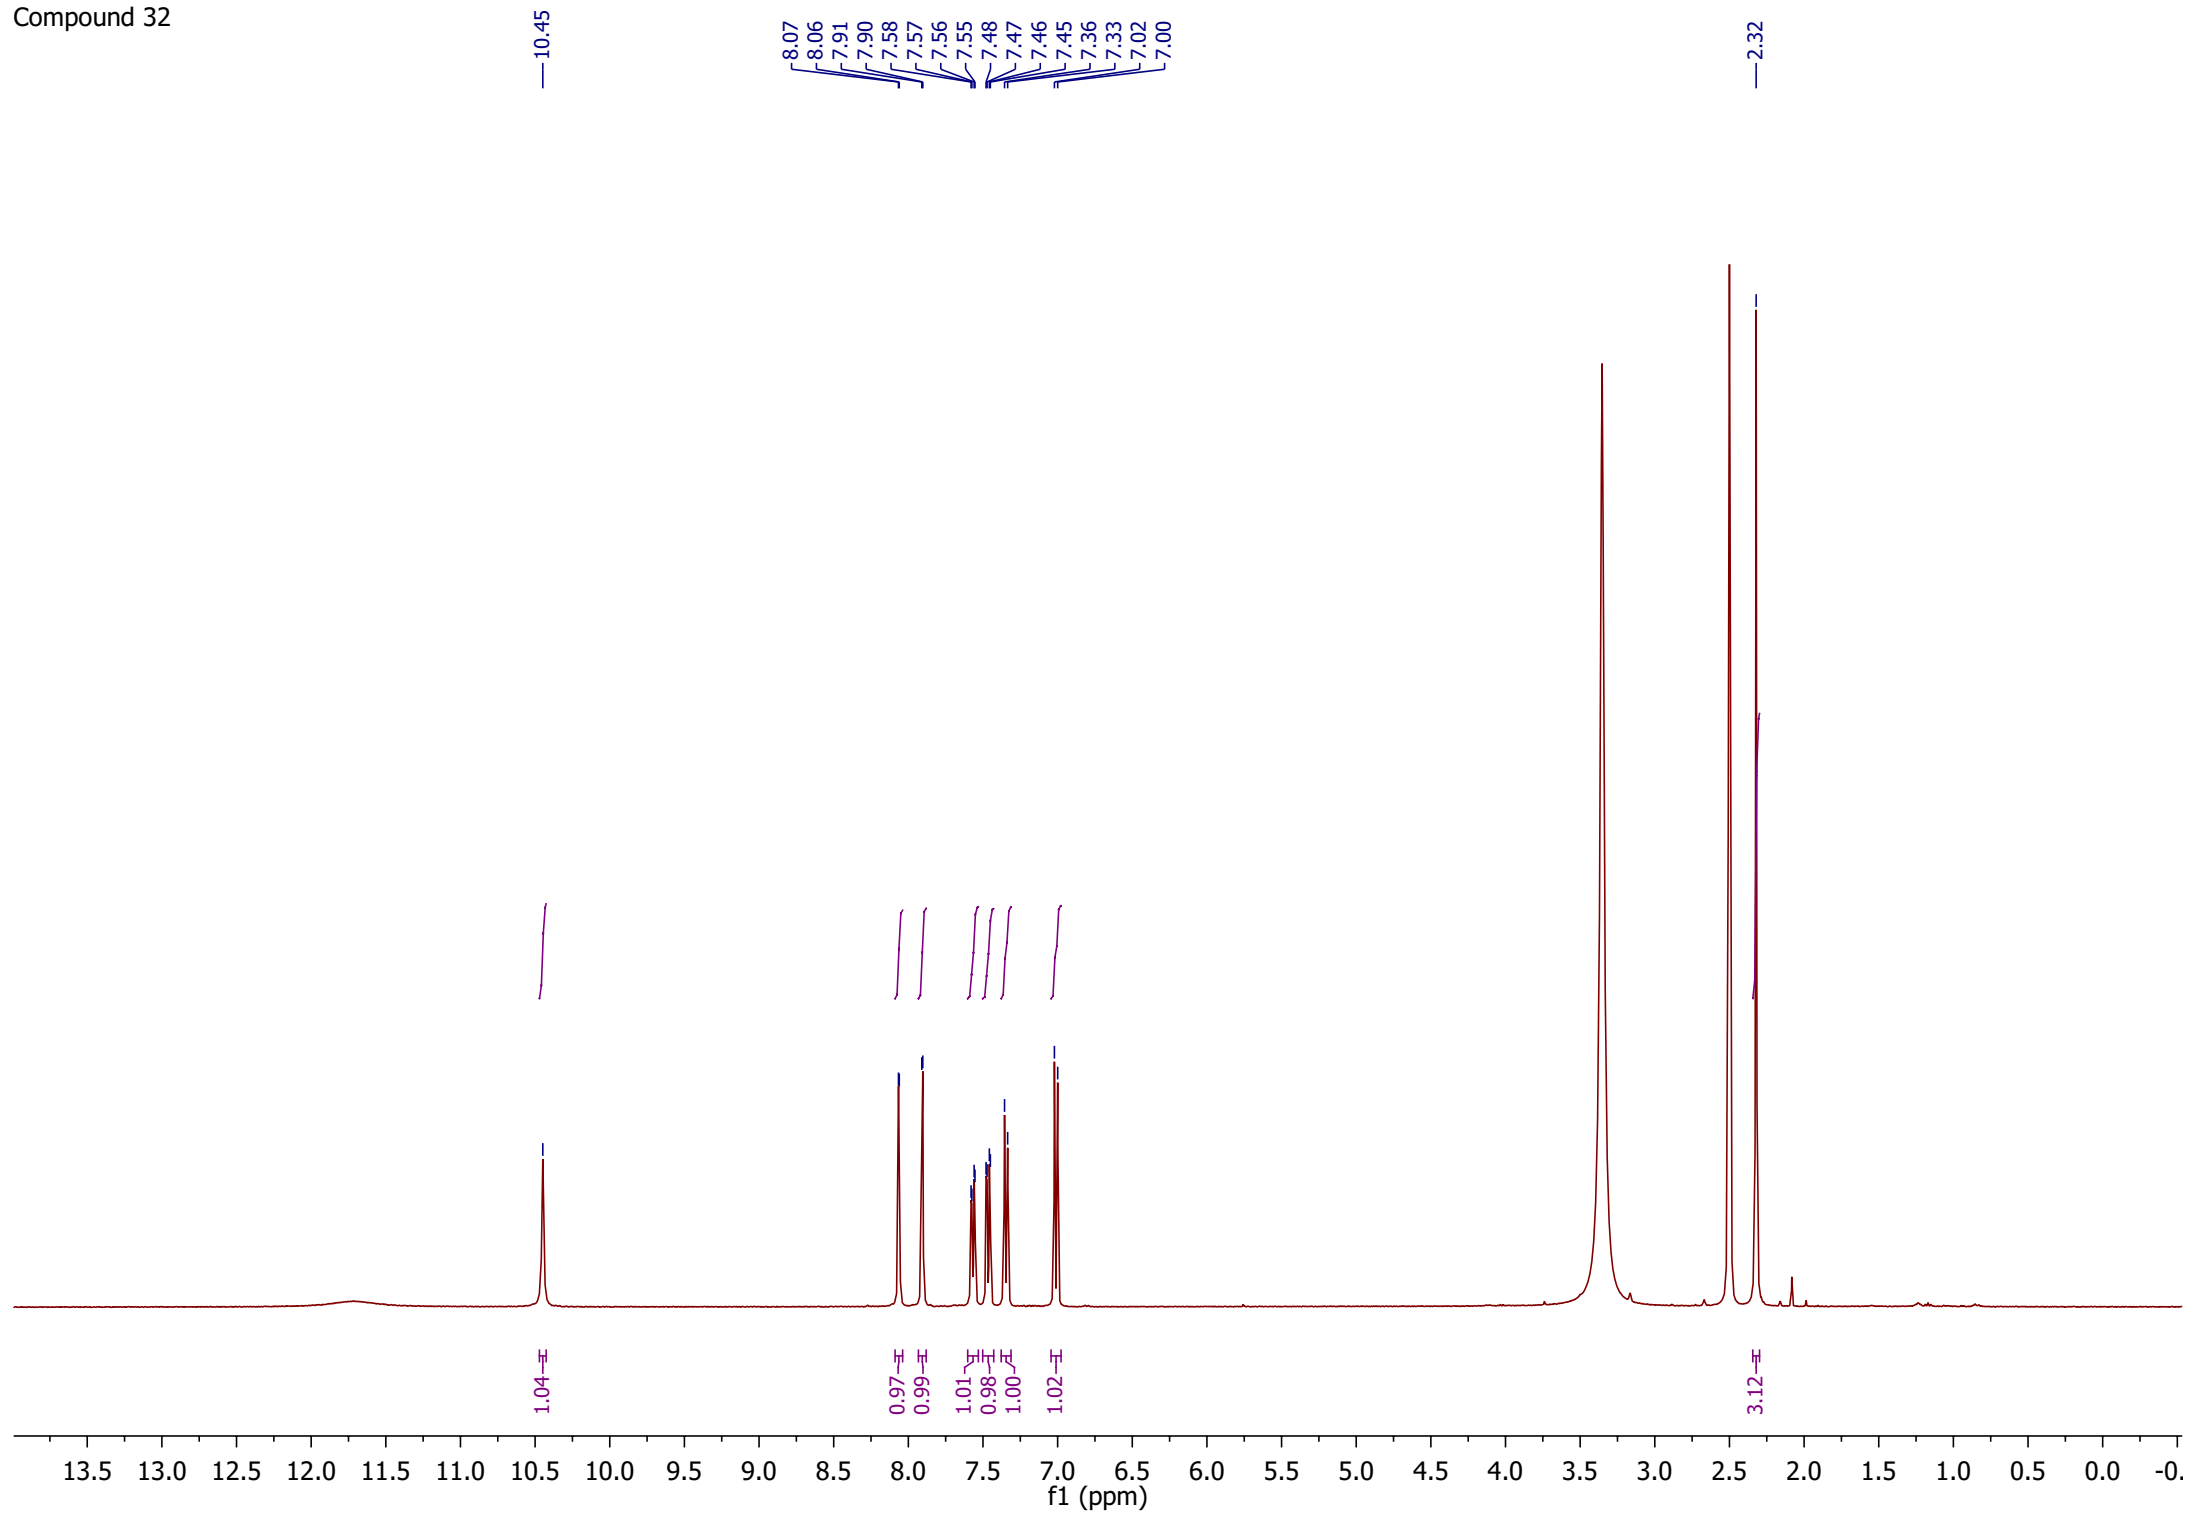

Compound 32

— 165.0

— 156.8

— 137.3

— 133.1

— 132.9

— 131.0

— 128.4

— 123.8

— 123.7

— 122.7

— 119.9

— 119.7

— 119.1

— 21.8

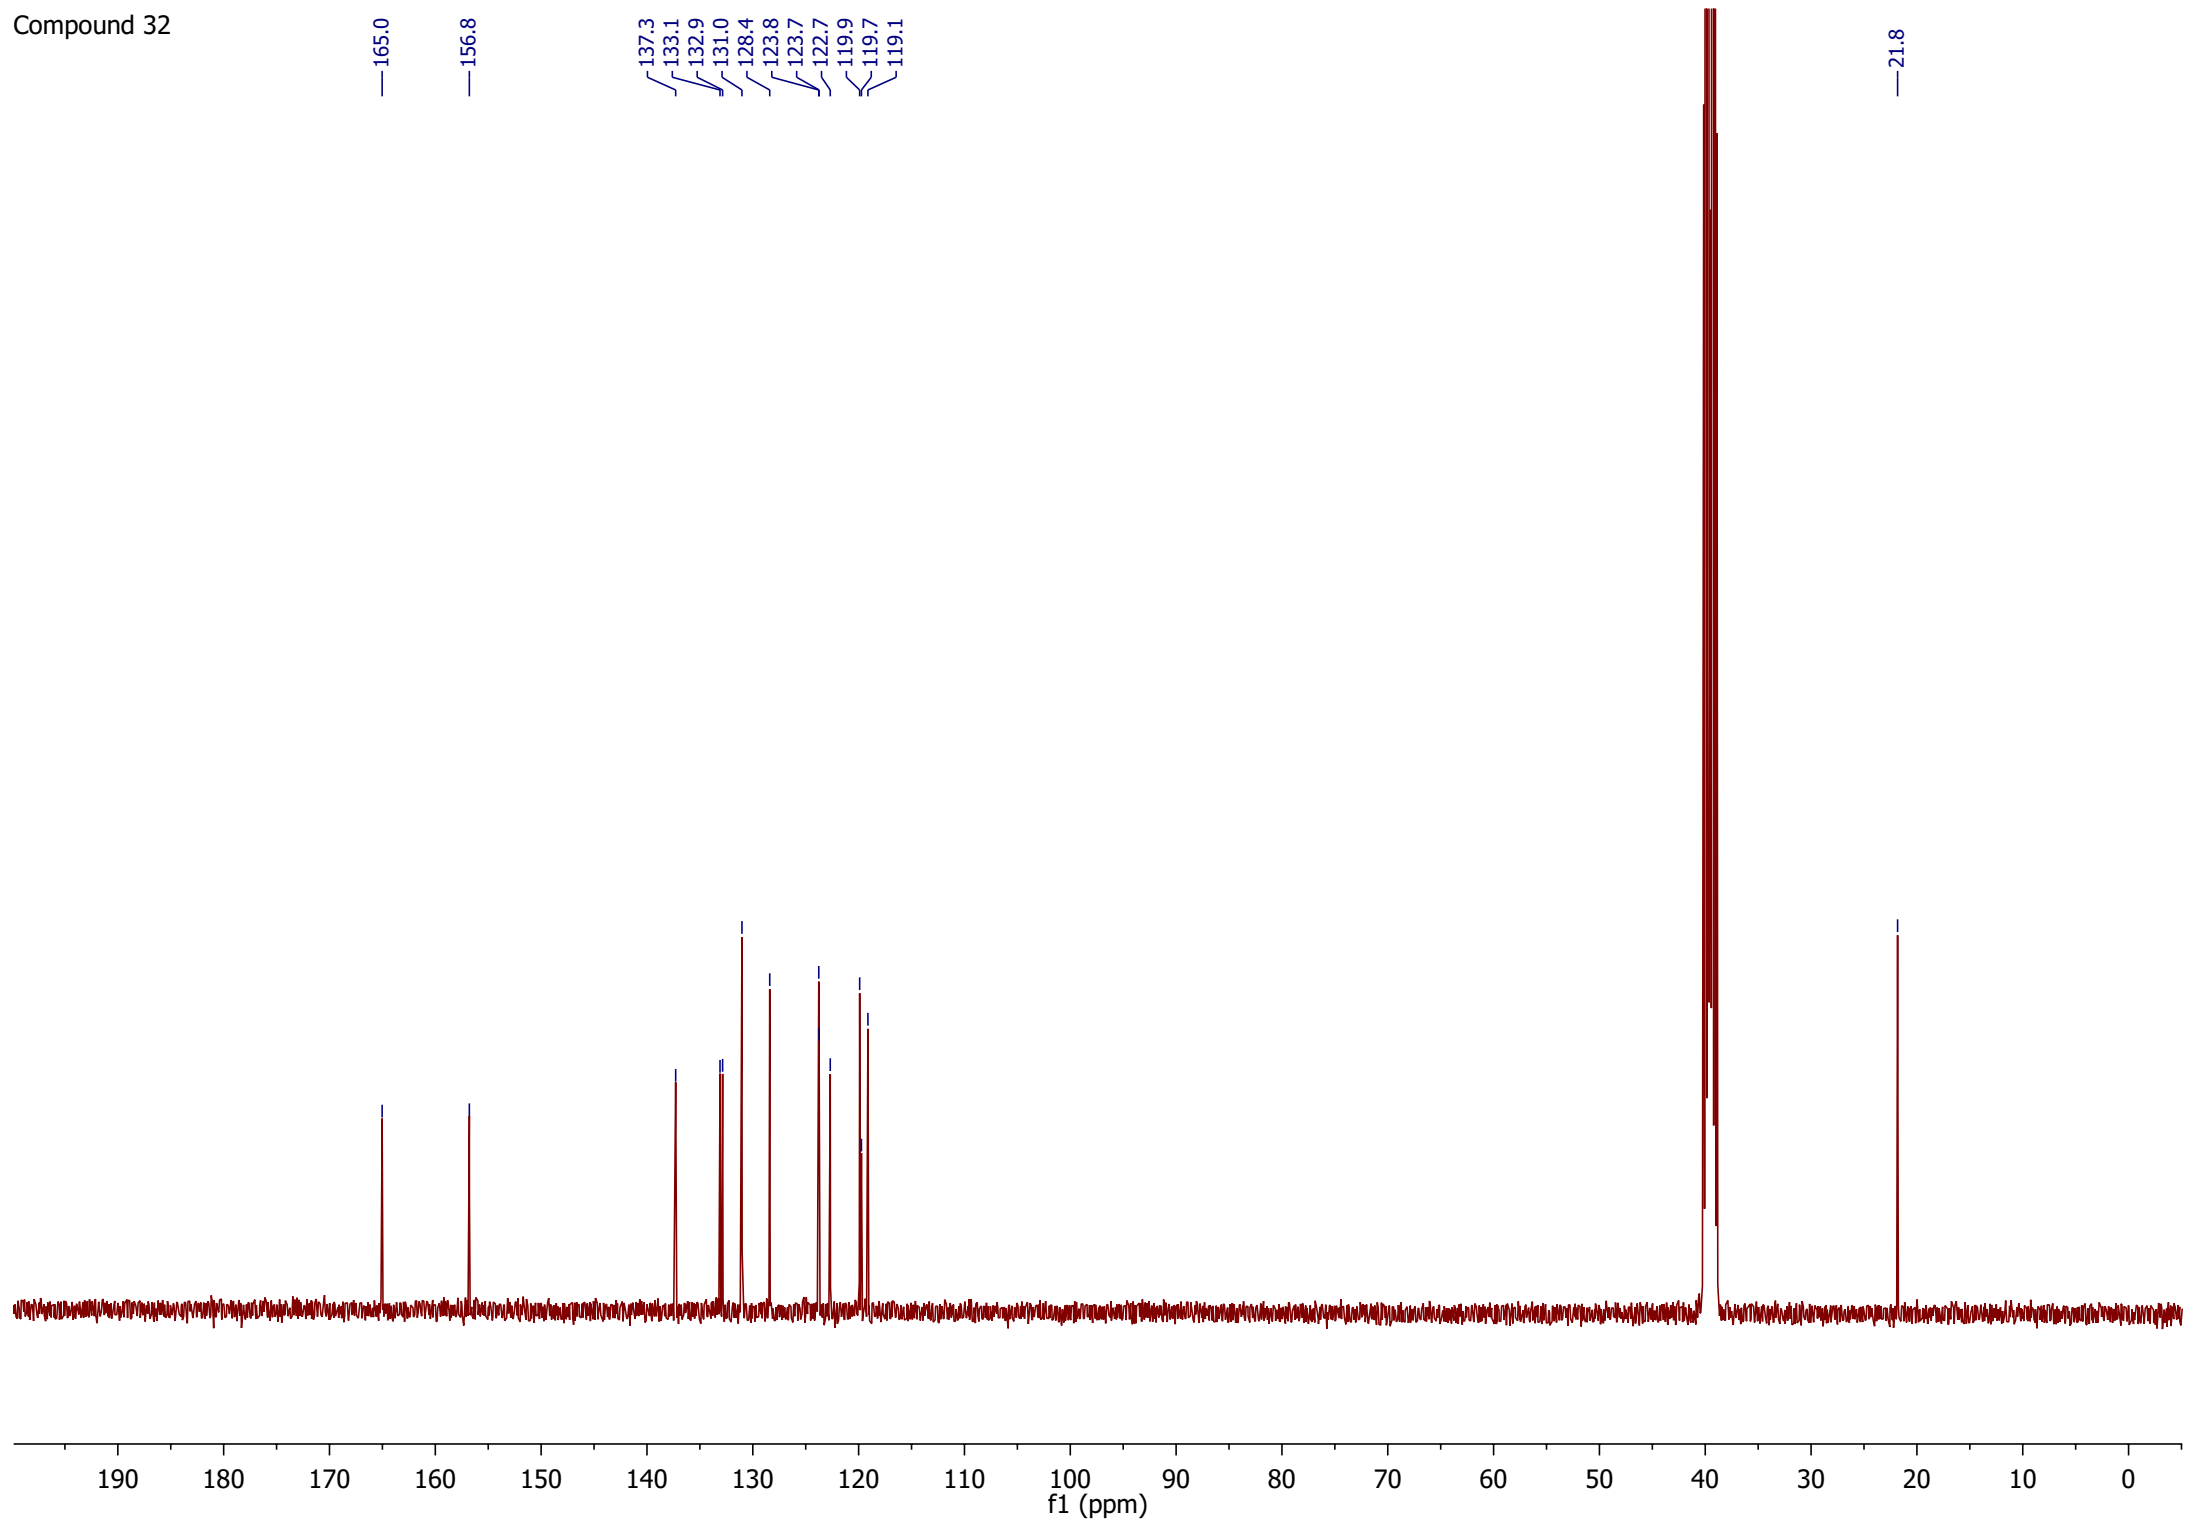

Compound 33

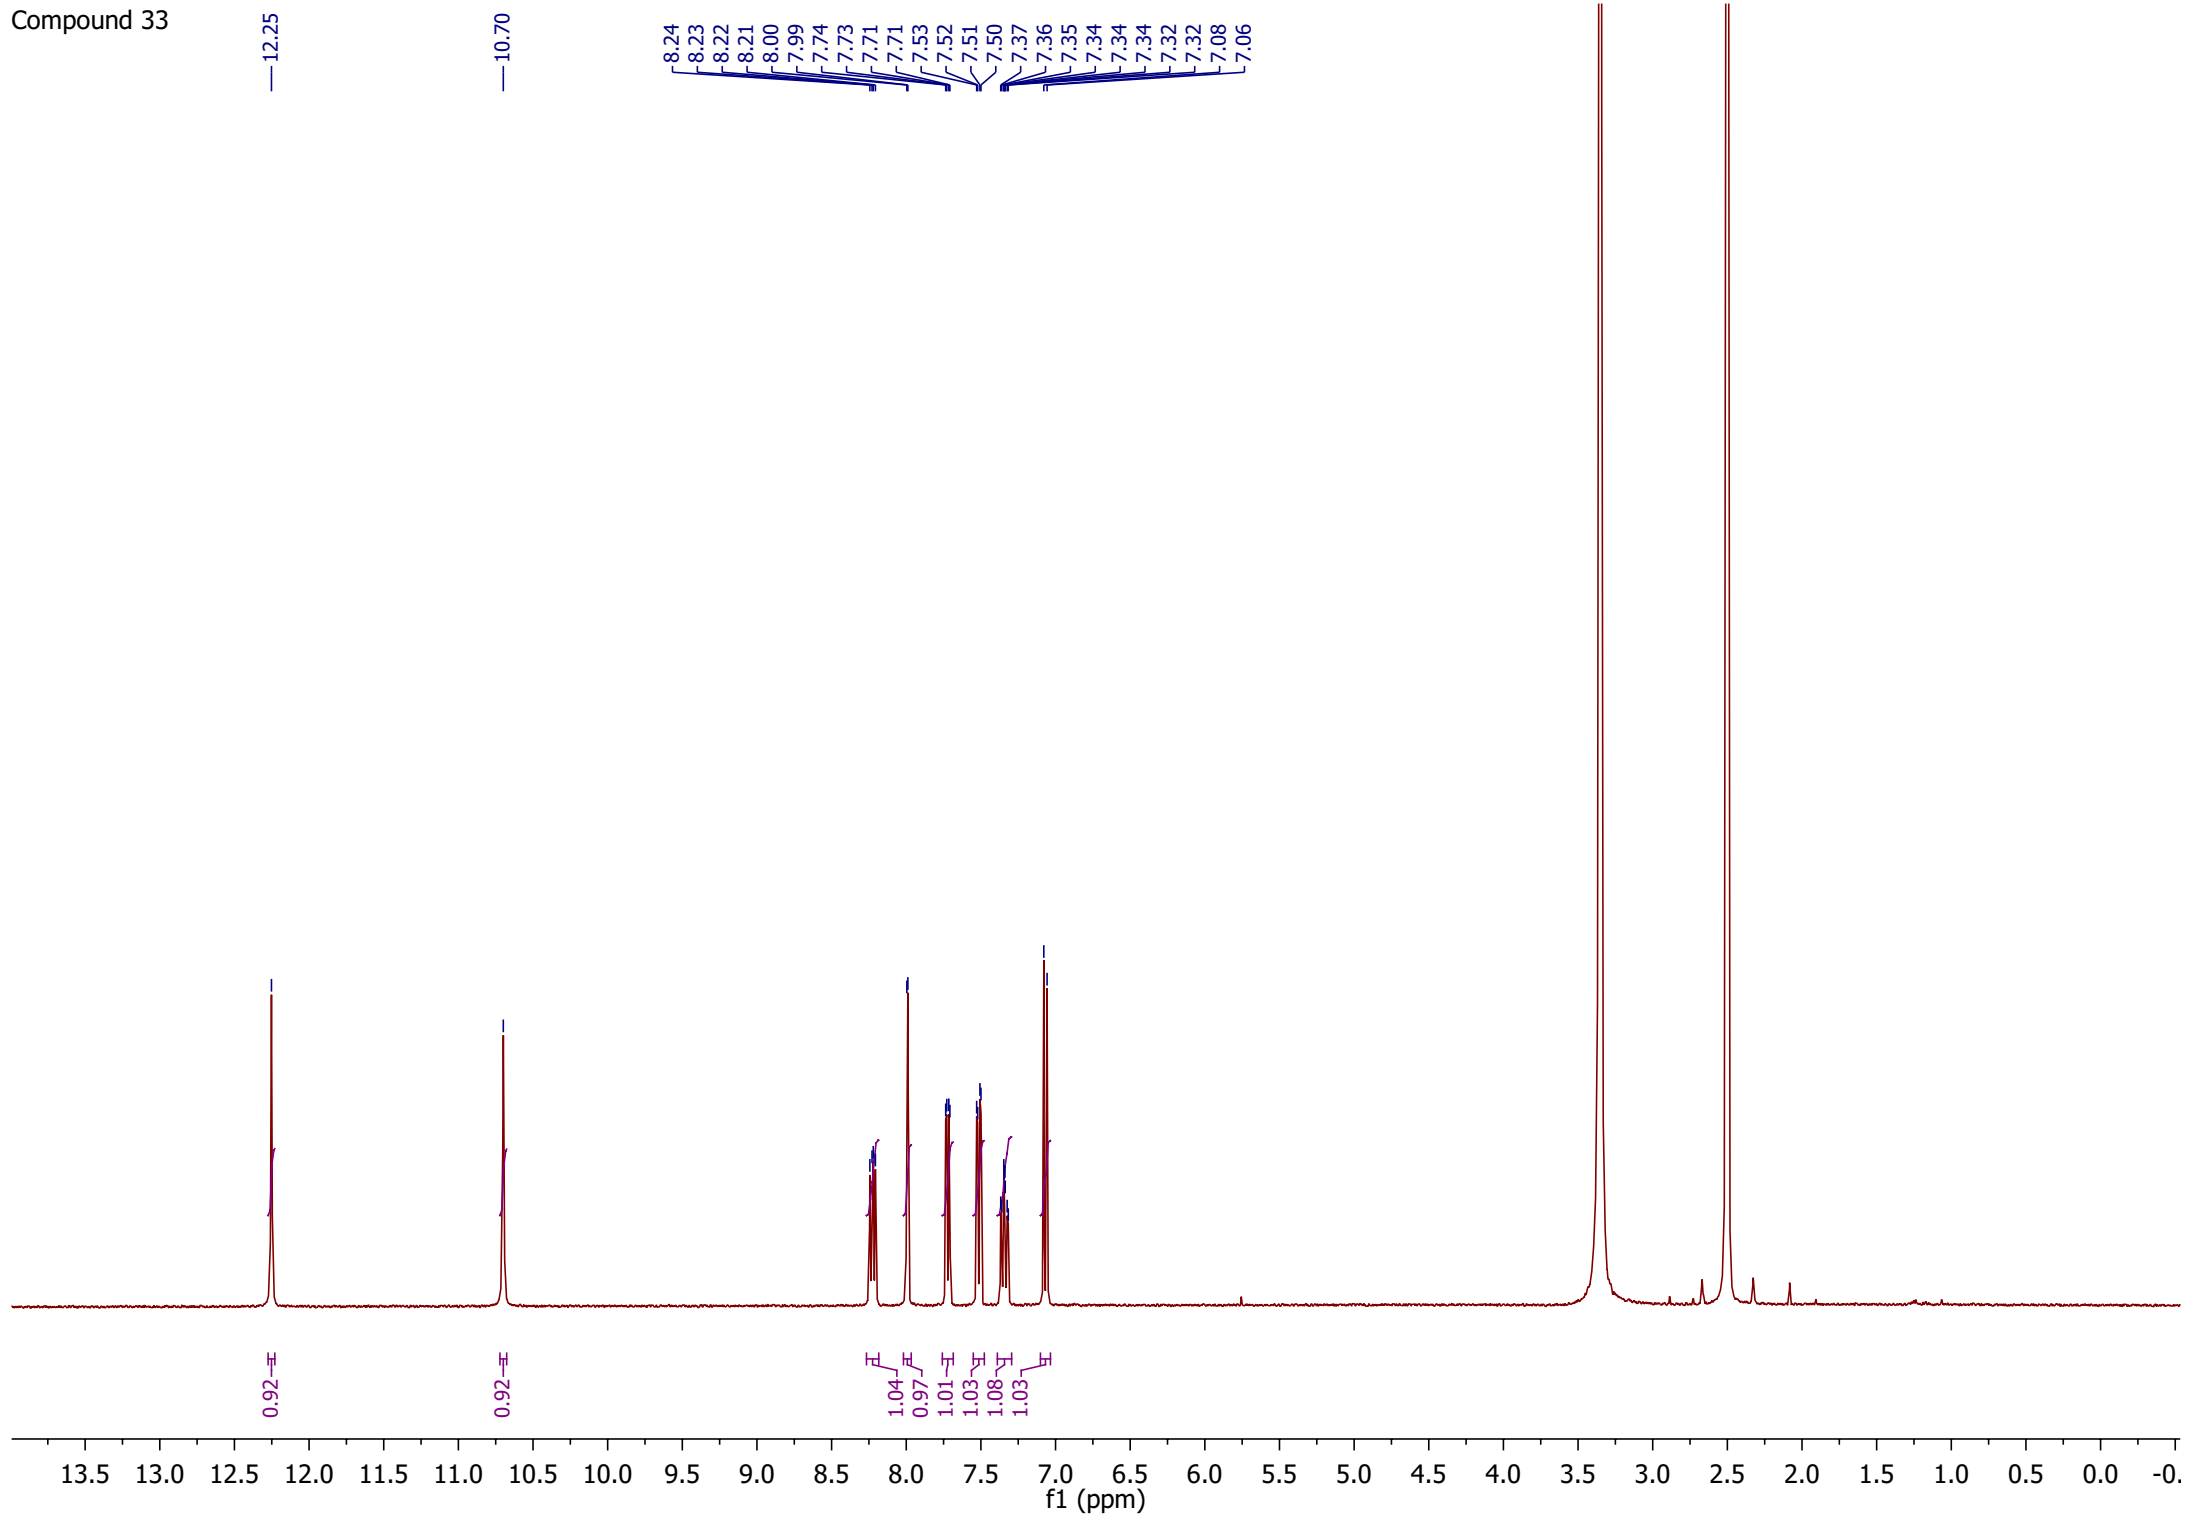



Compound 33

163.3  
159.8  
157.3  
155.9  
133.6  
133.0  
133.0  
129.5  
125.6  
125.5  
123.4  
119.8  
119.5  
119.2  
119.1  
115.9  
115.8  
115.4  
115.2

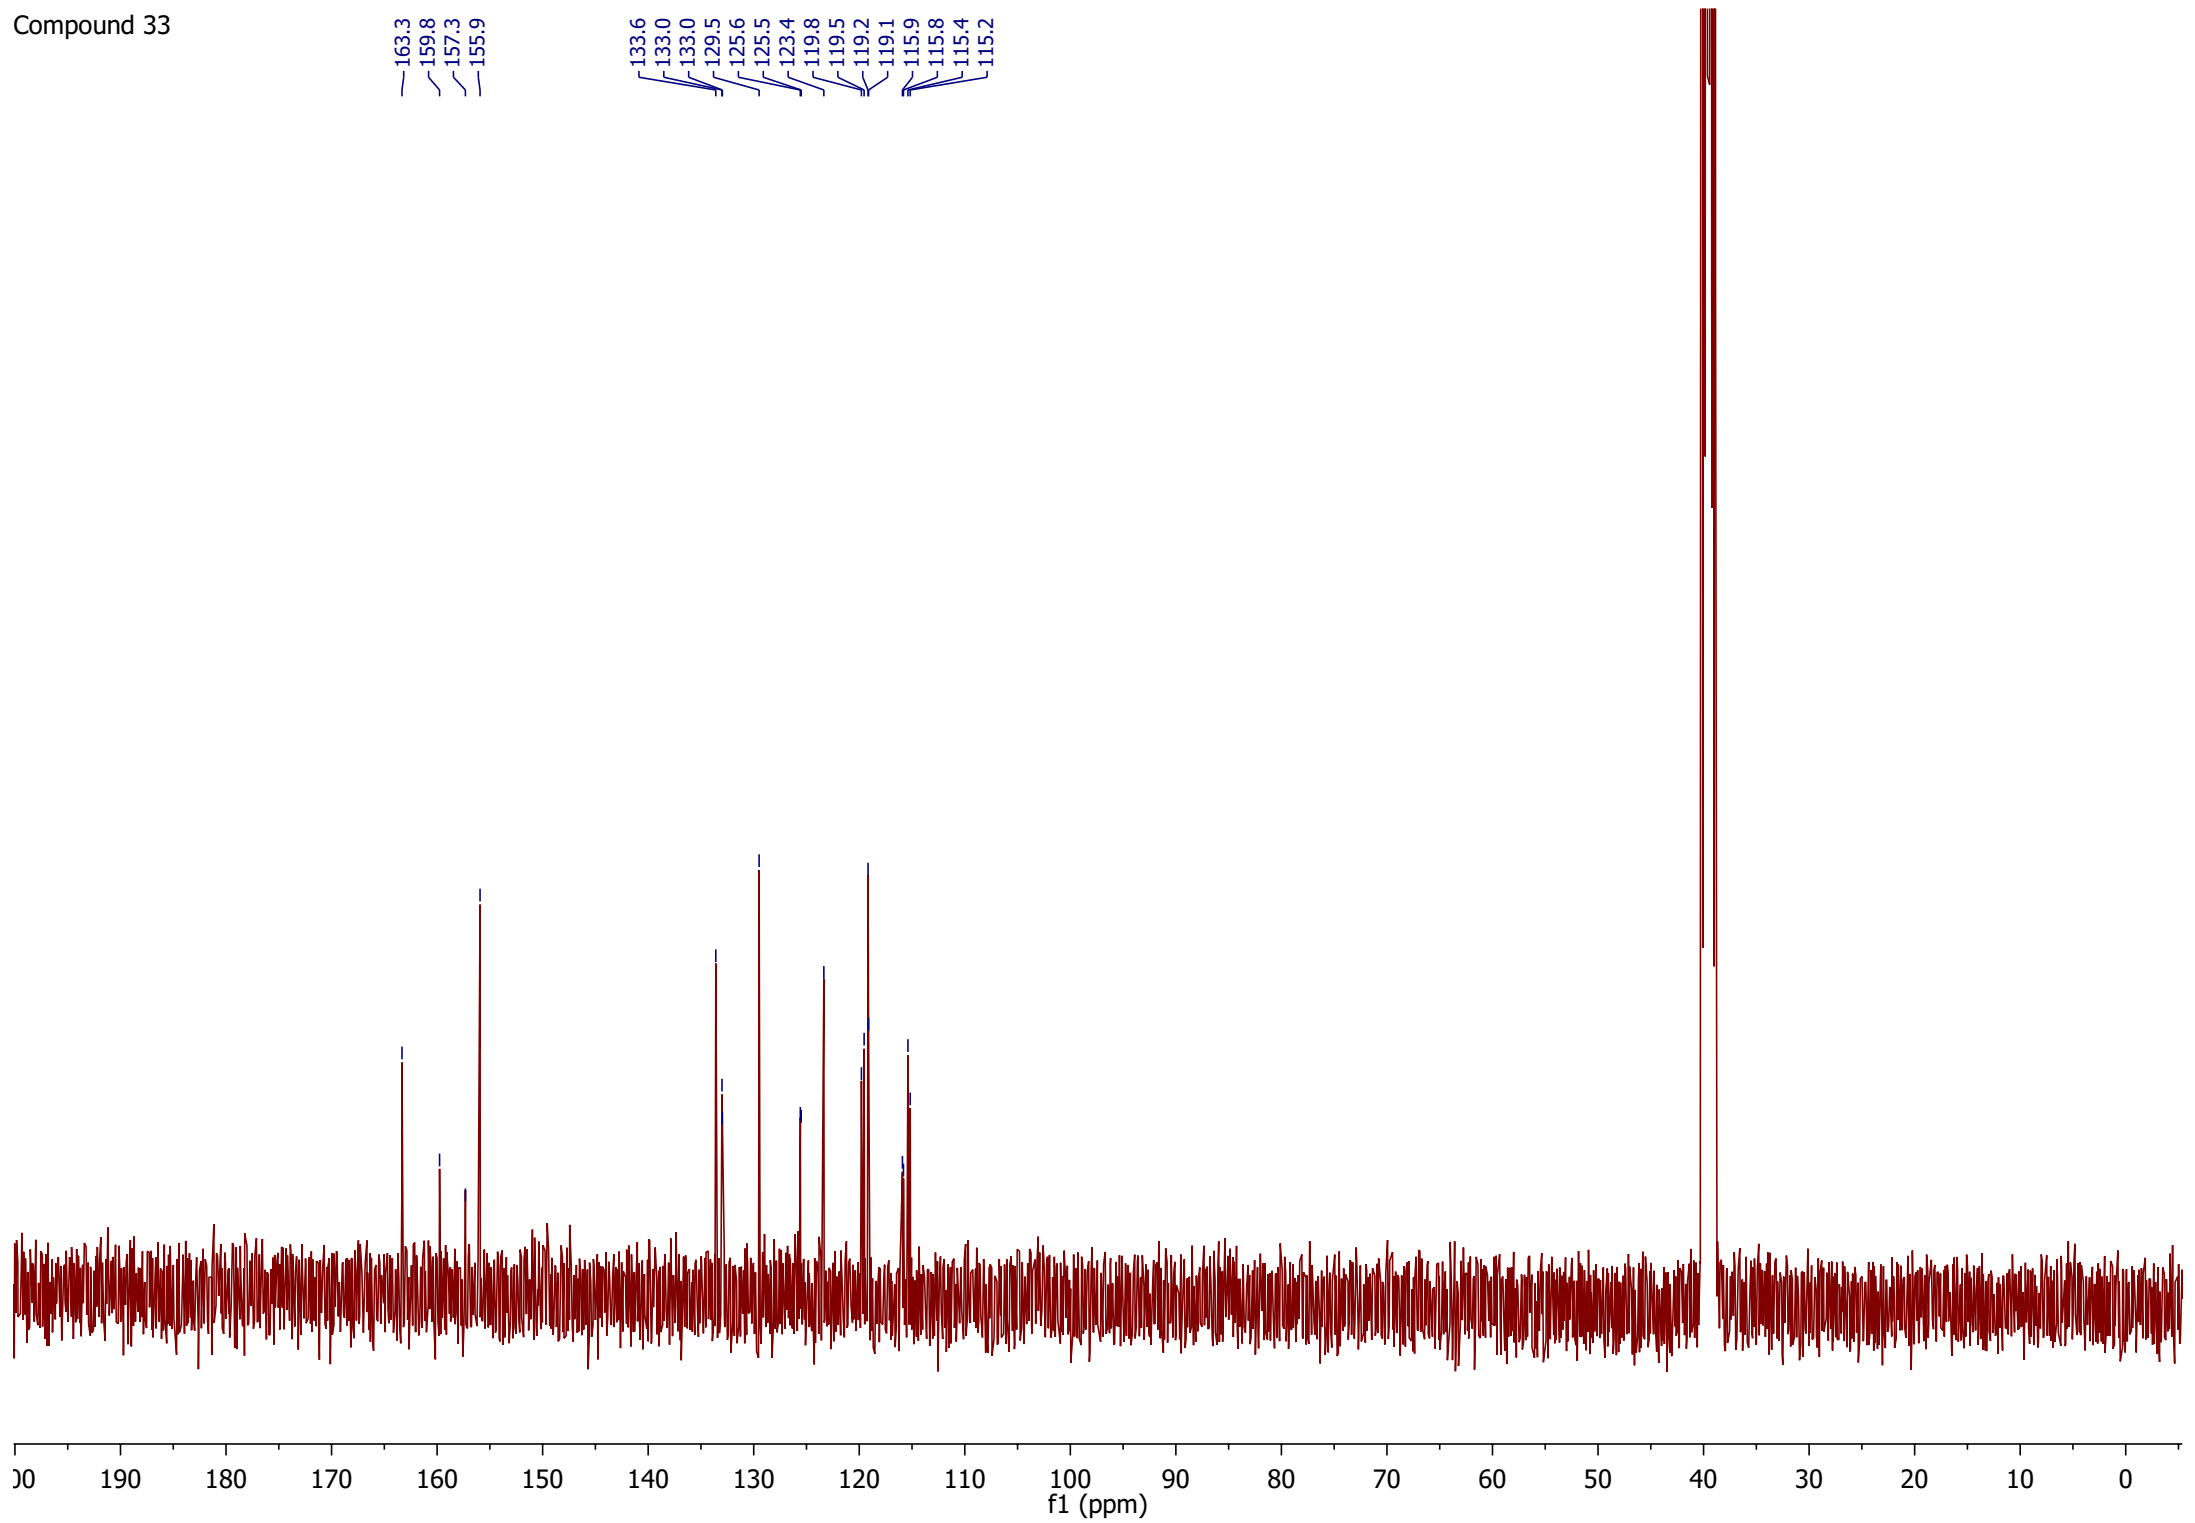

Compound 34

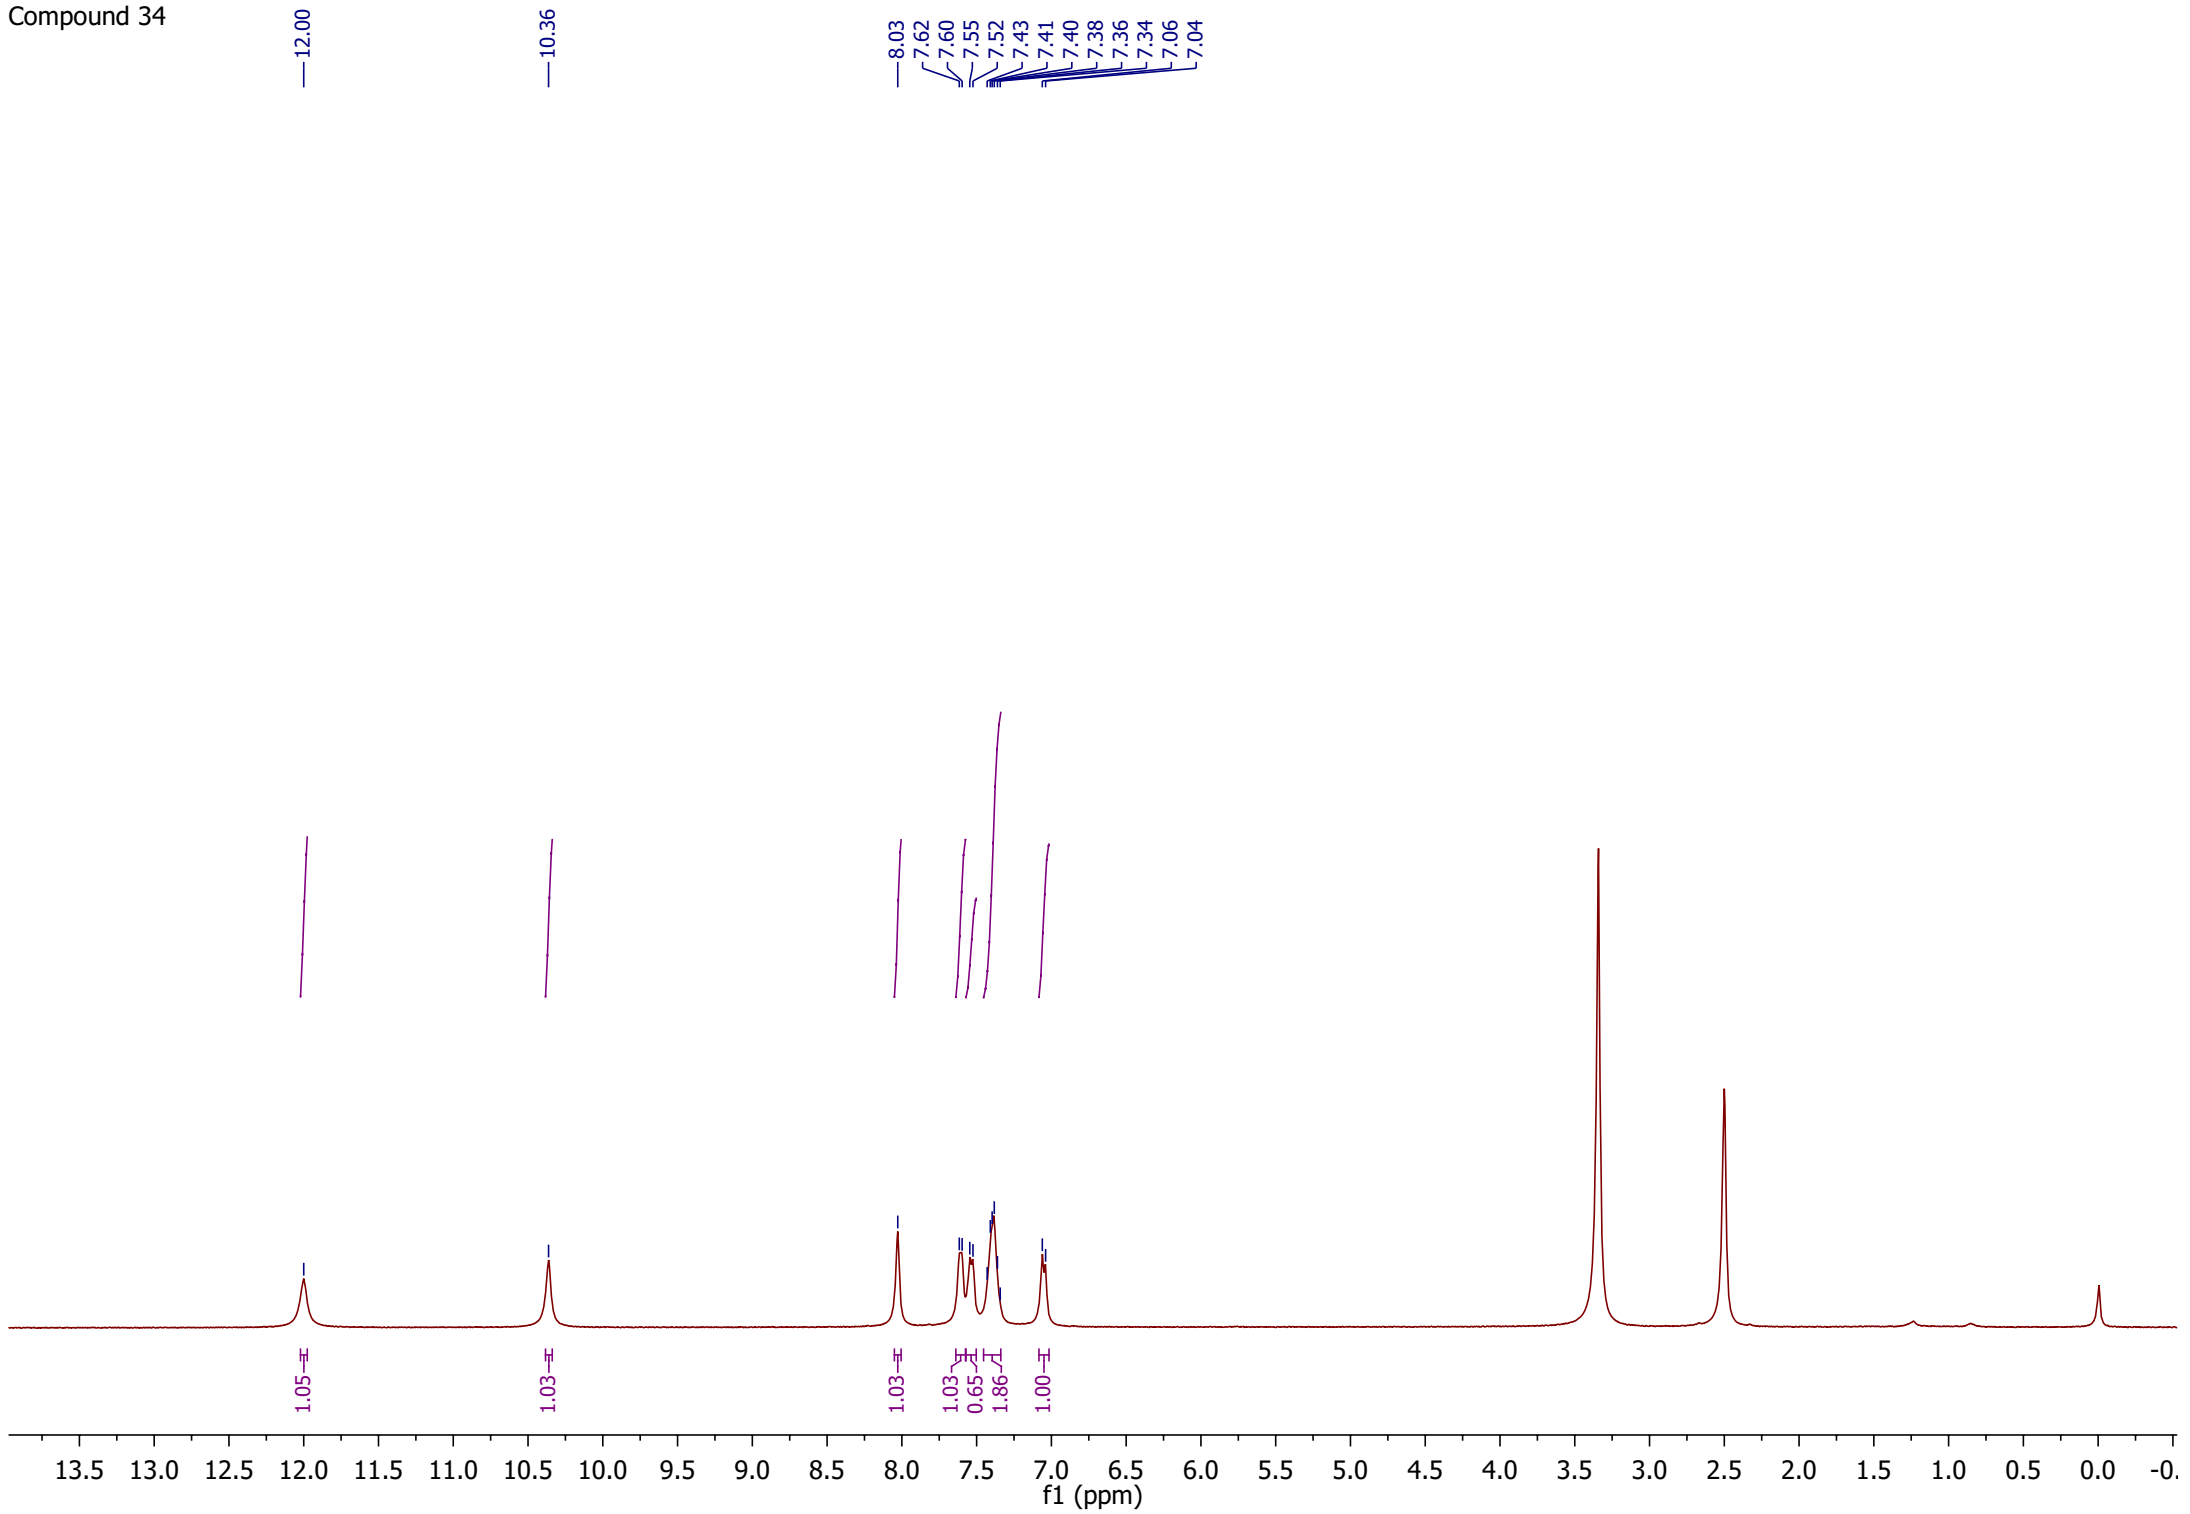

Compound 34

— 165.3  
— 159.5  
— 157.6  
— 157.0  
— 133.9  
— 130.1  
— 130.0  
— 128.5  
— 128.5  
— 128.4  
— 124.6  
— 124.4  
— 123.1  
— 122.9  
— 119.5  
— 117.4  
— 115.8  
— 115.6

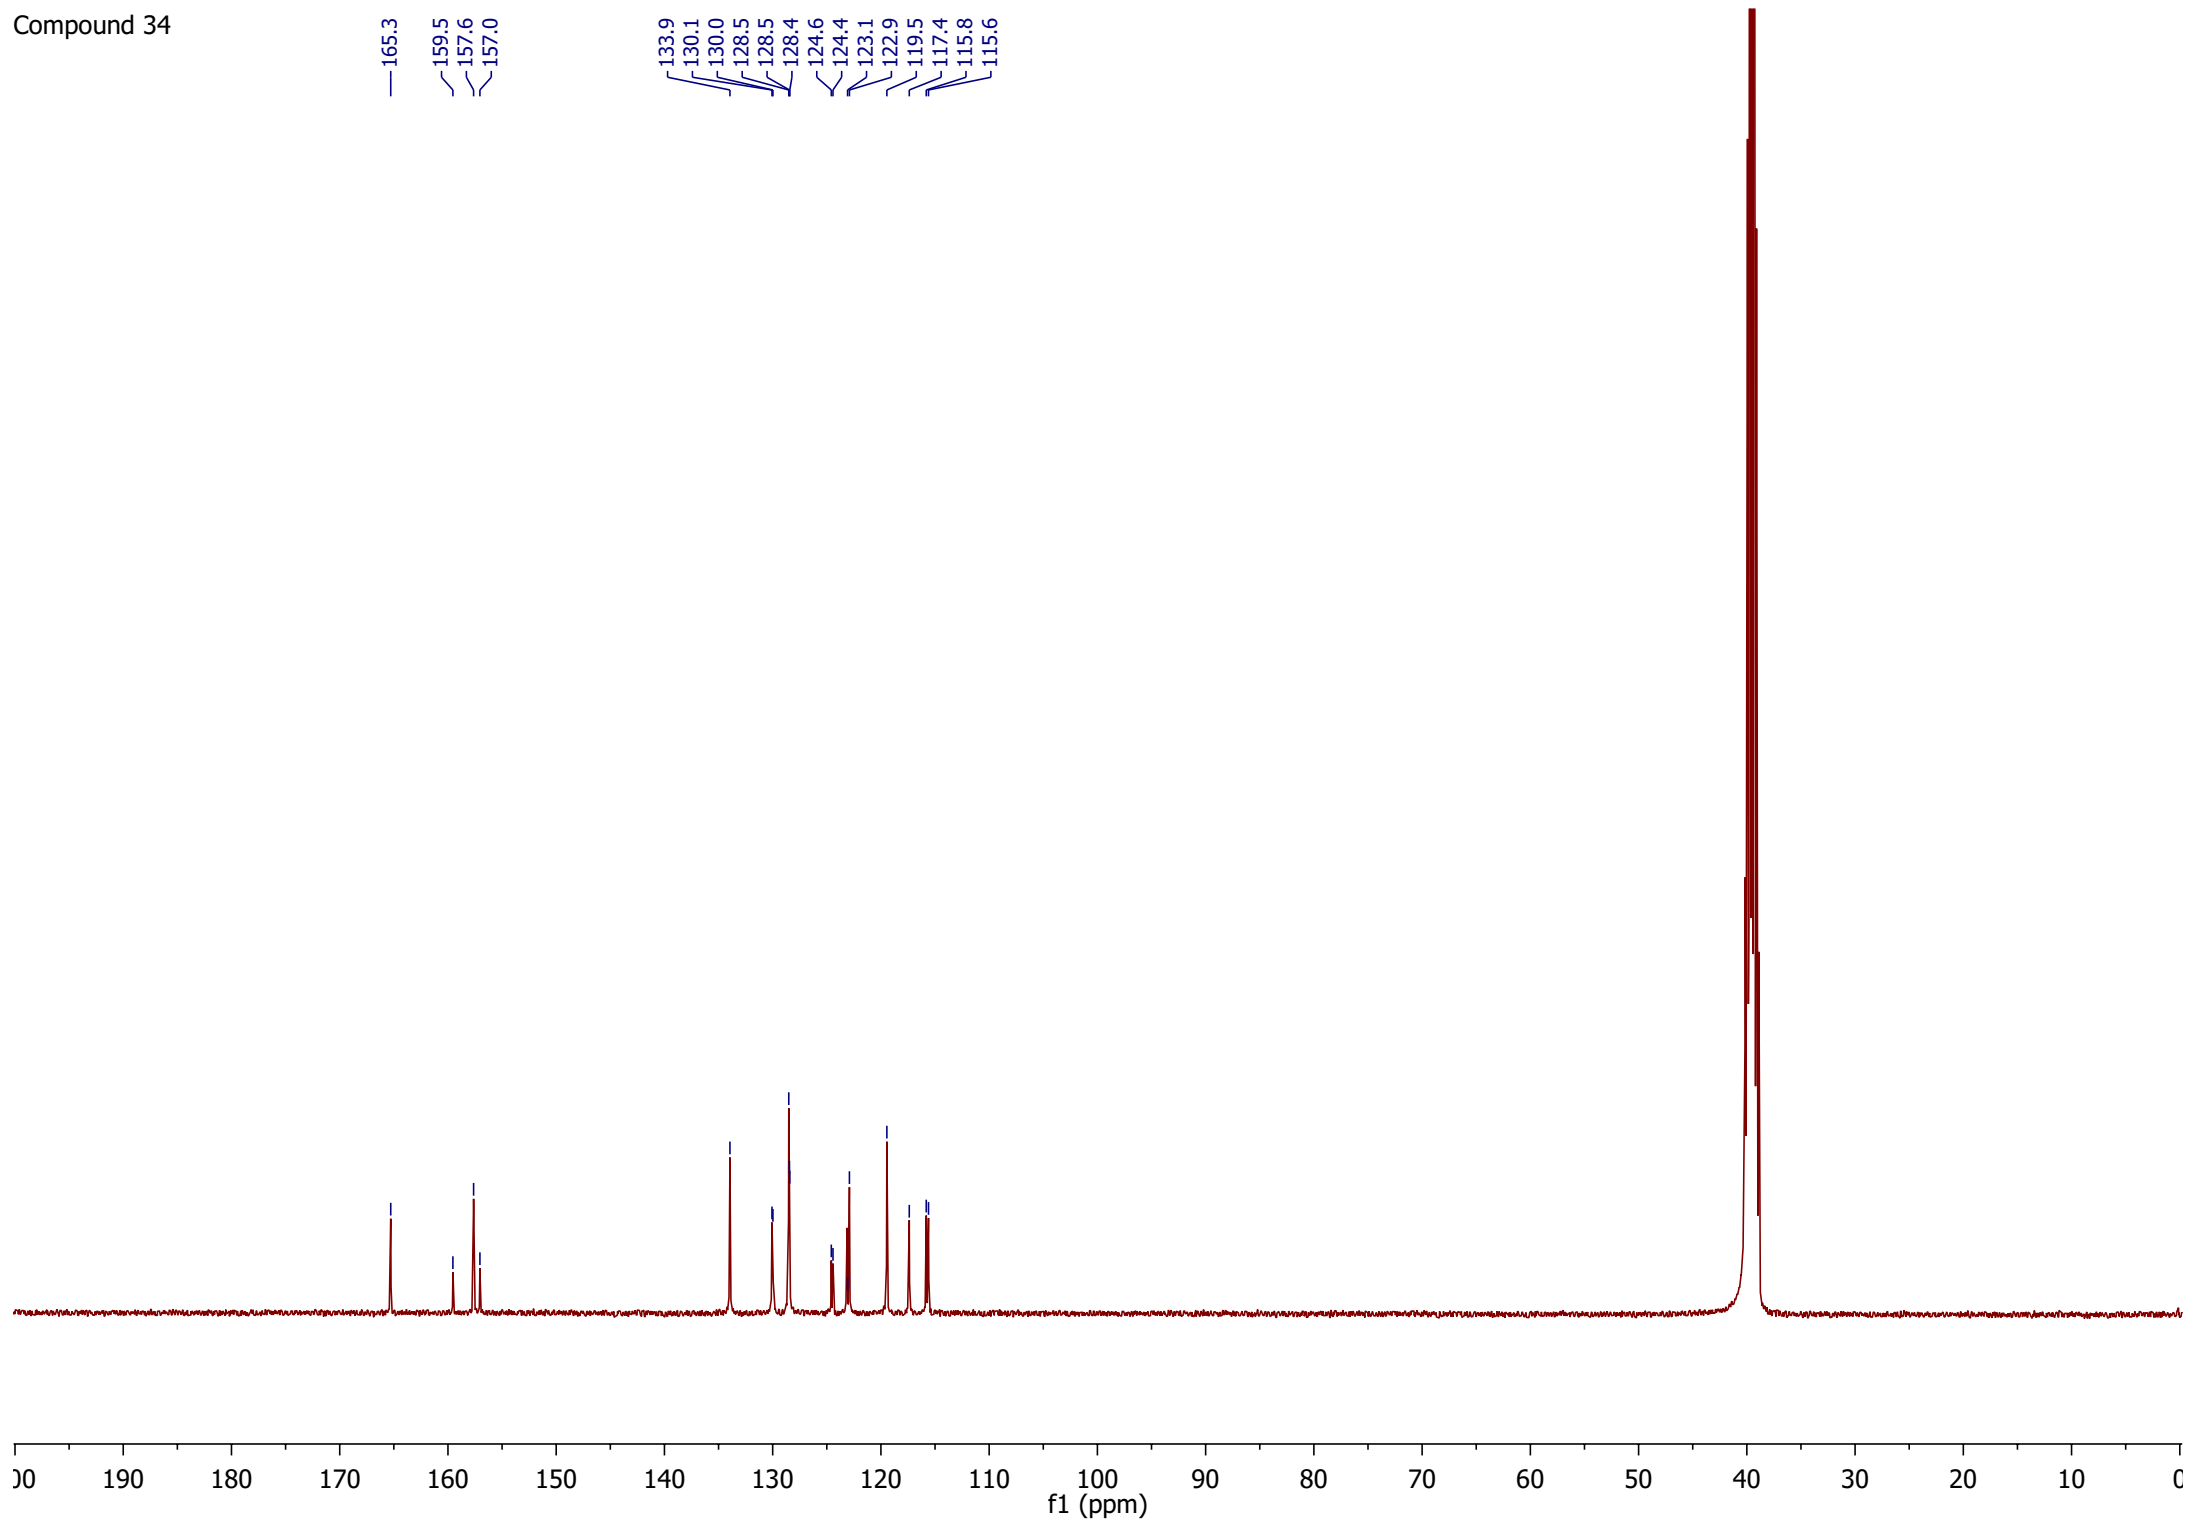

Compound 35

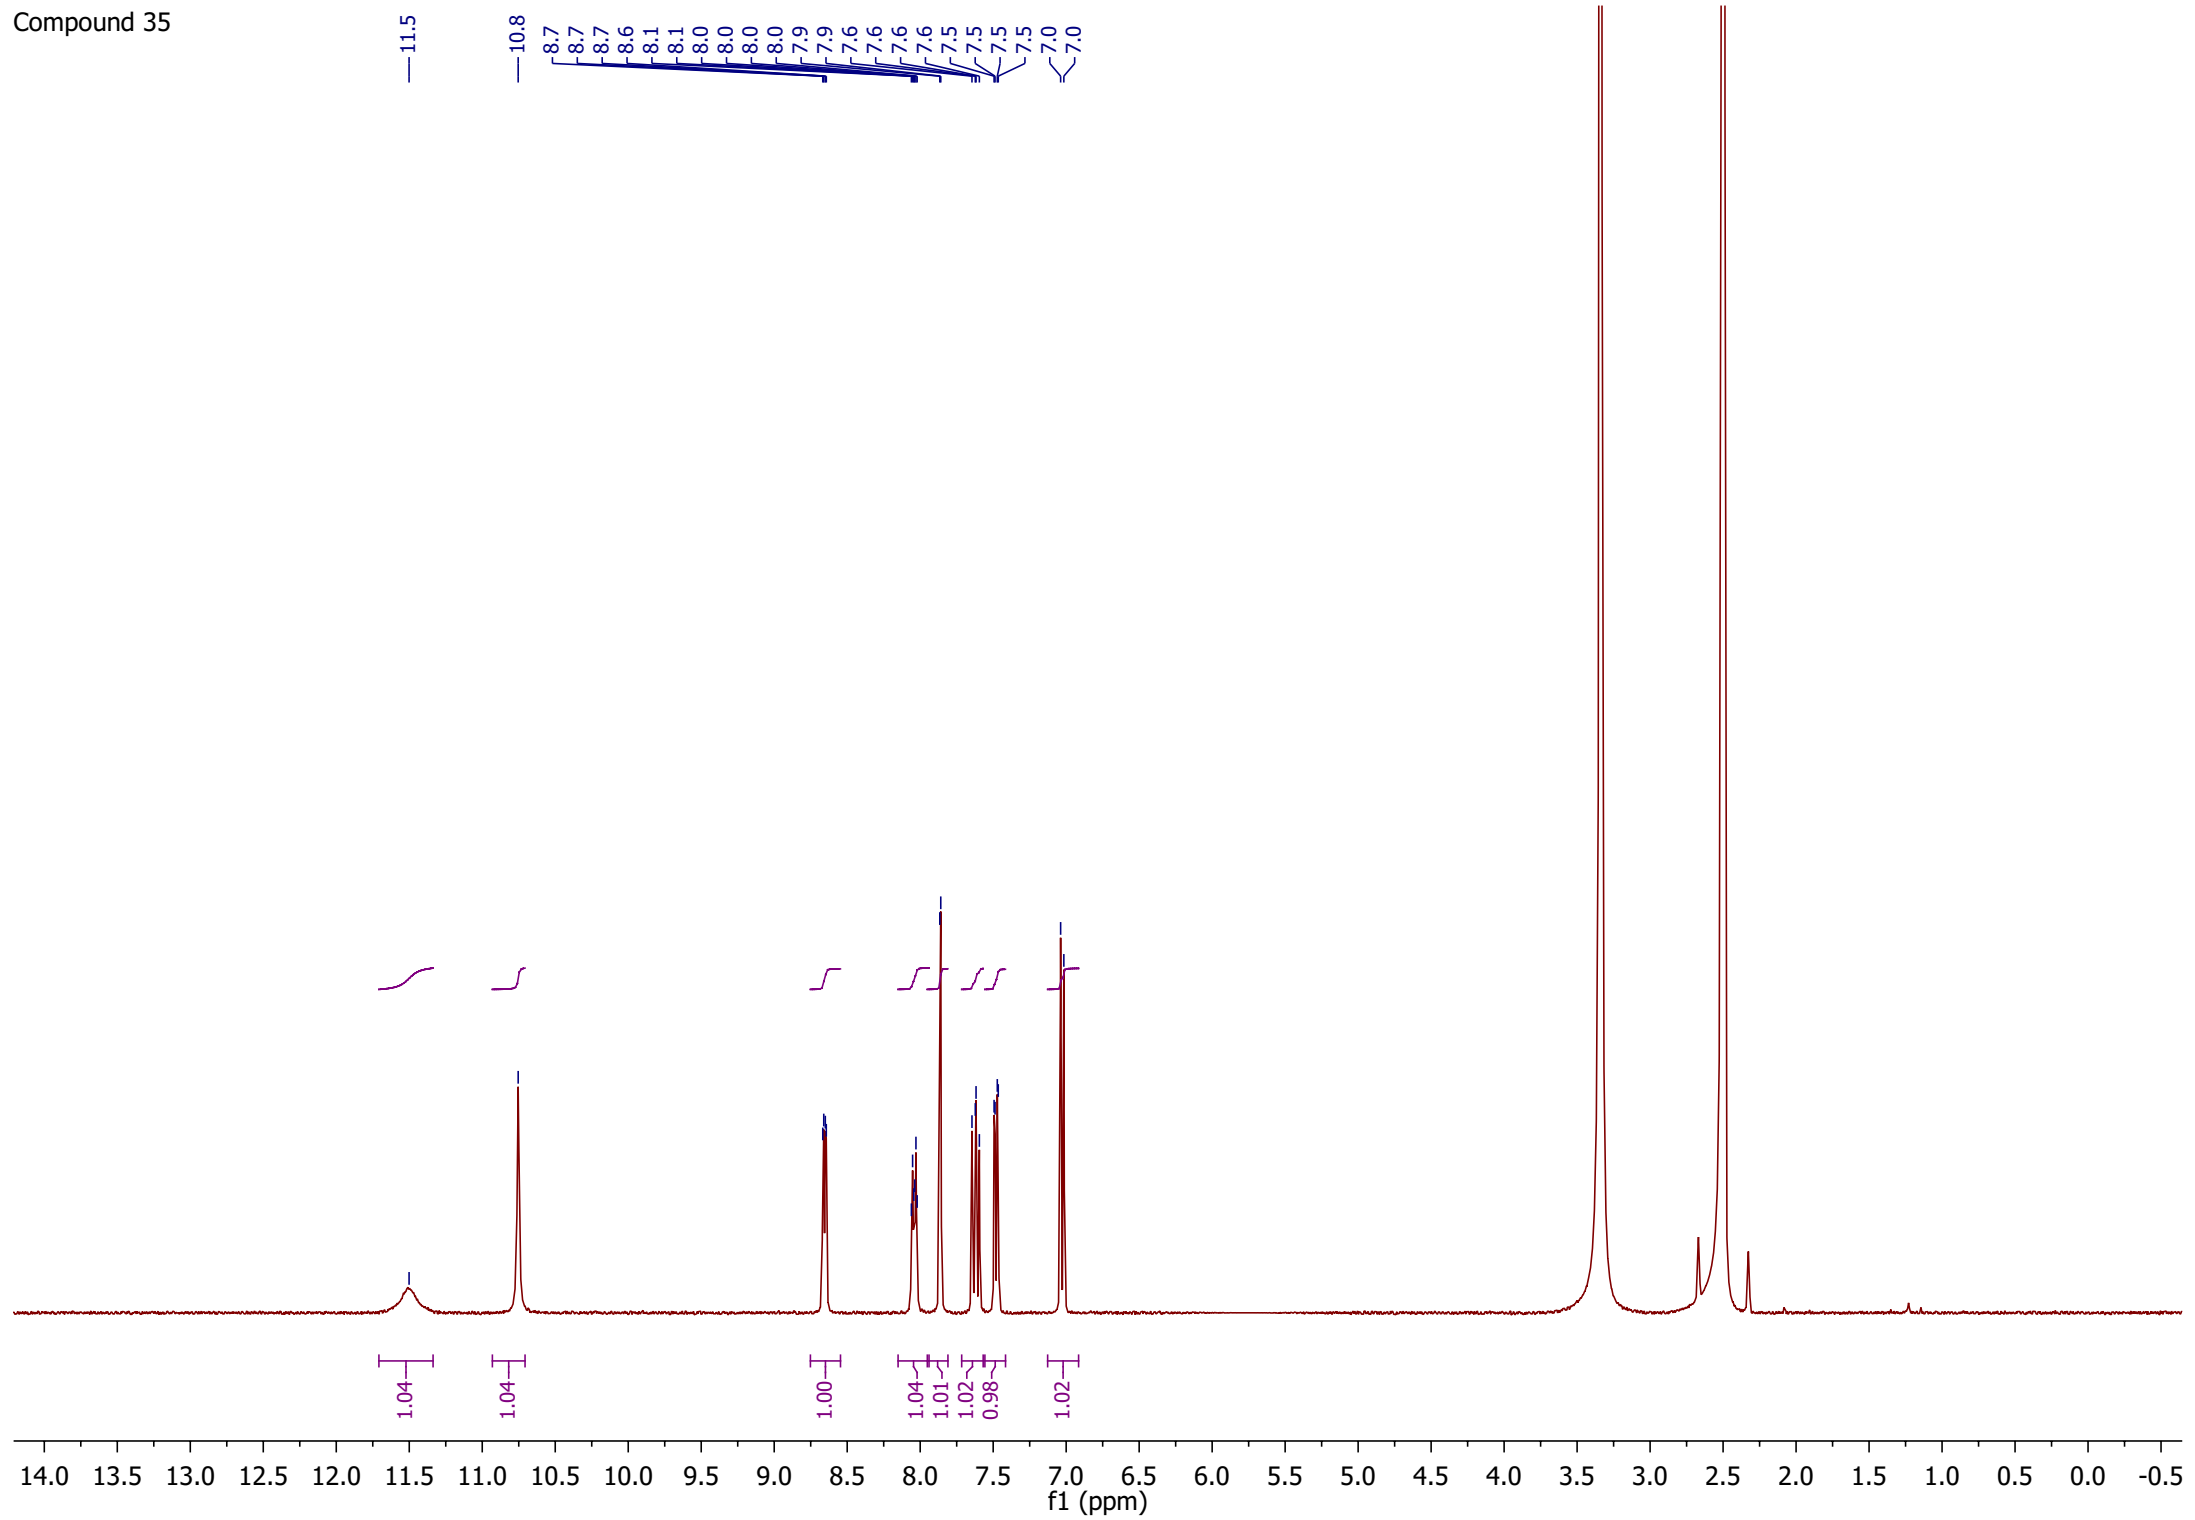

Compound 35

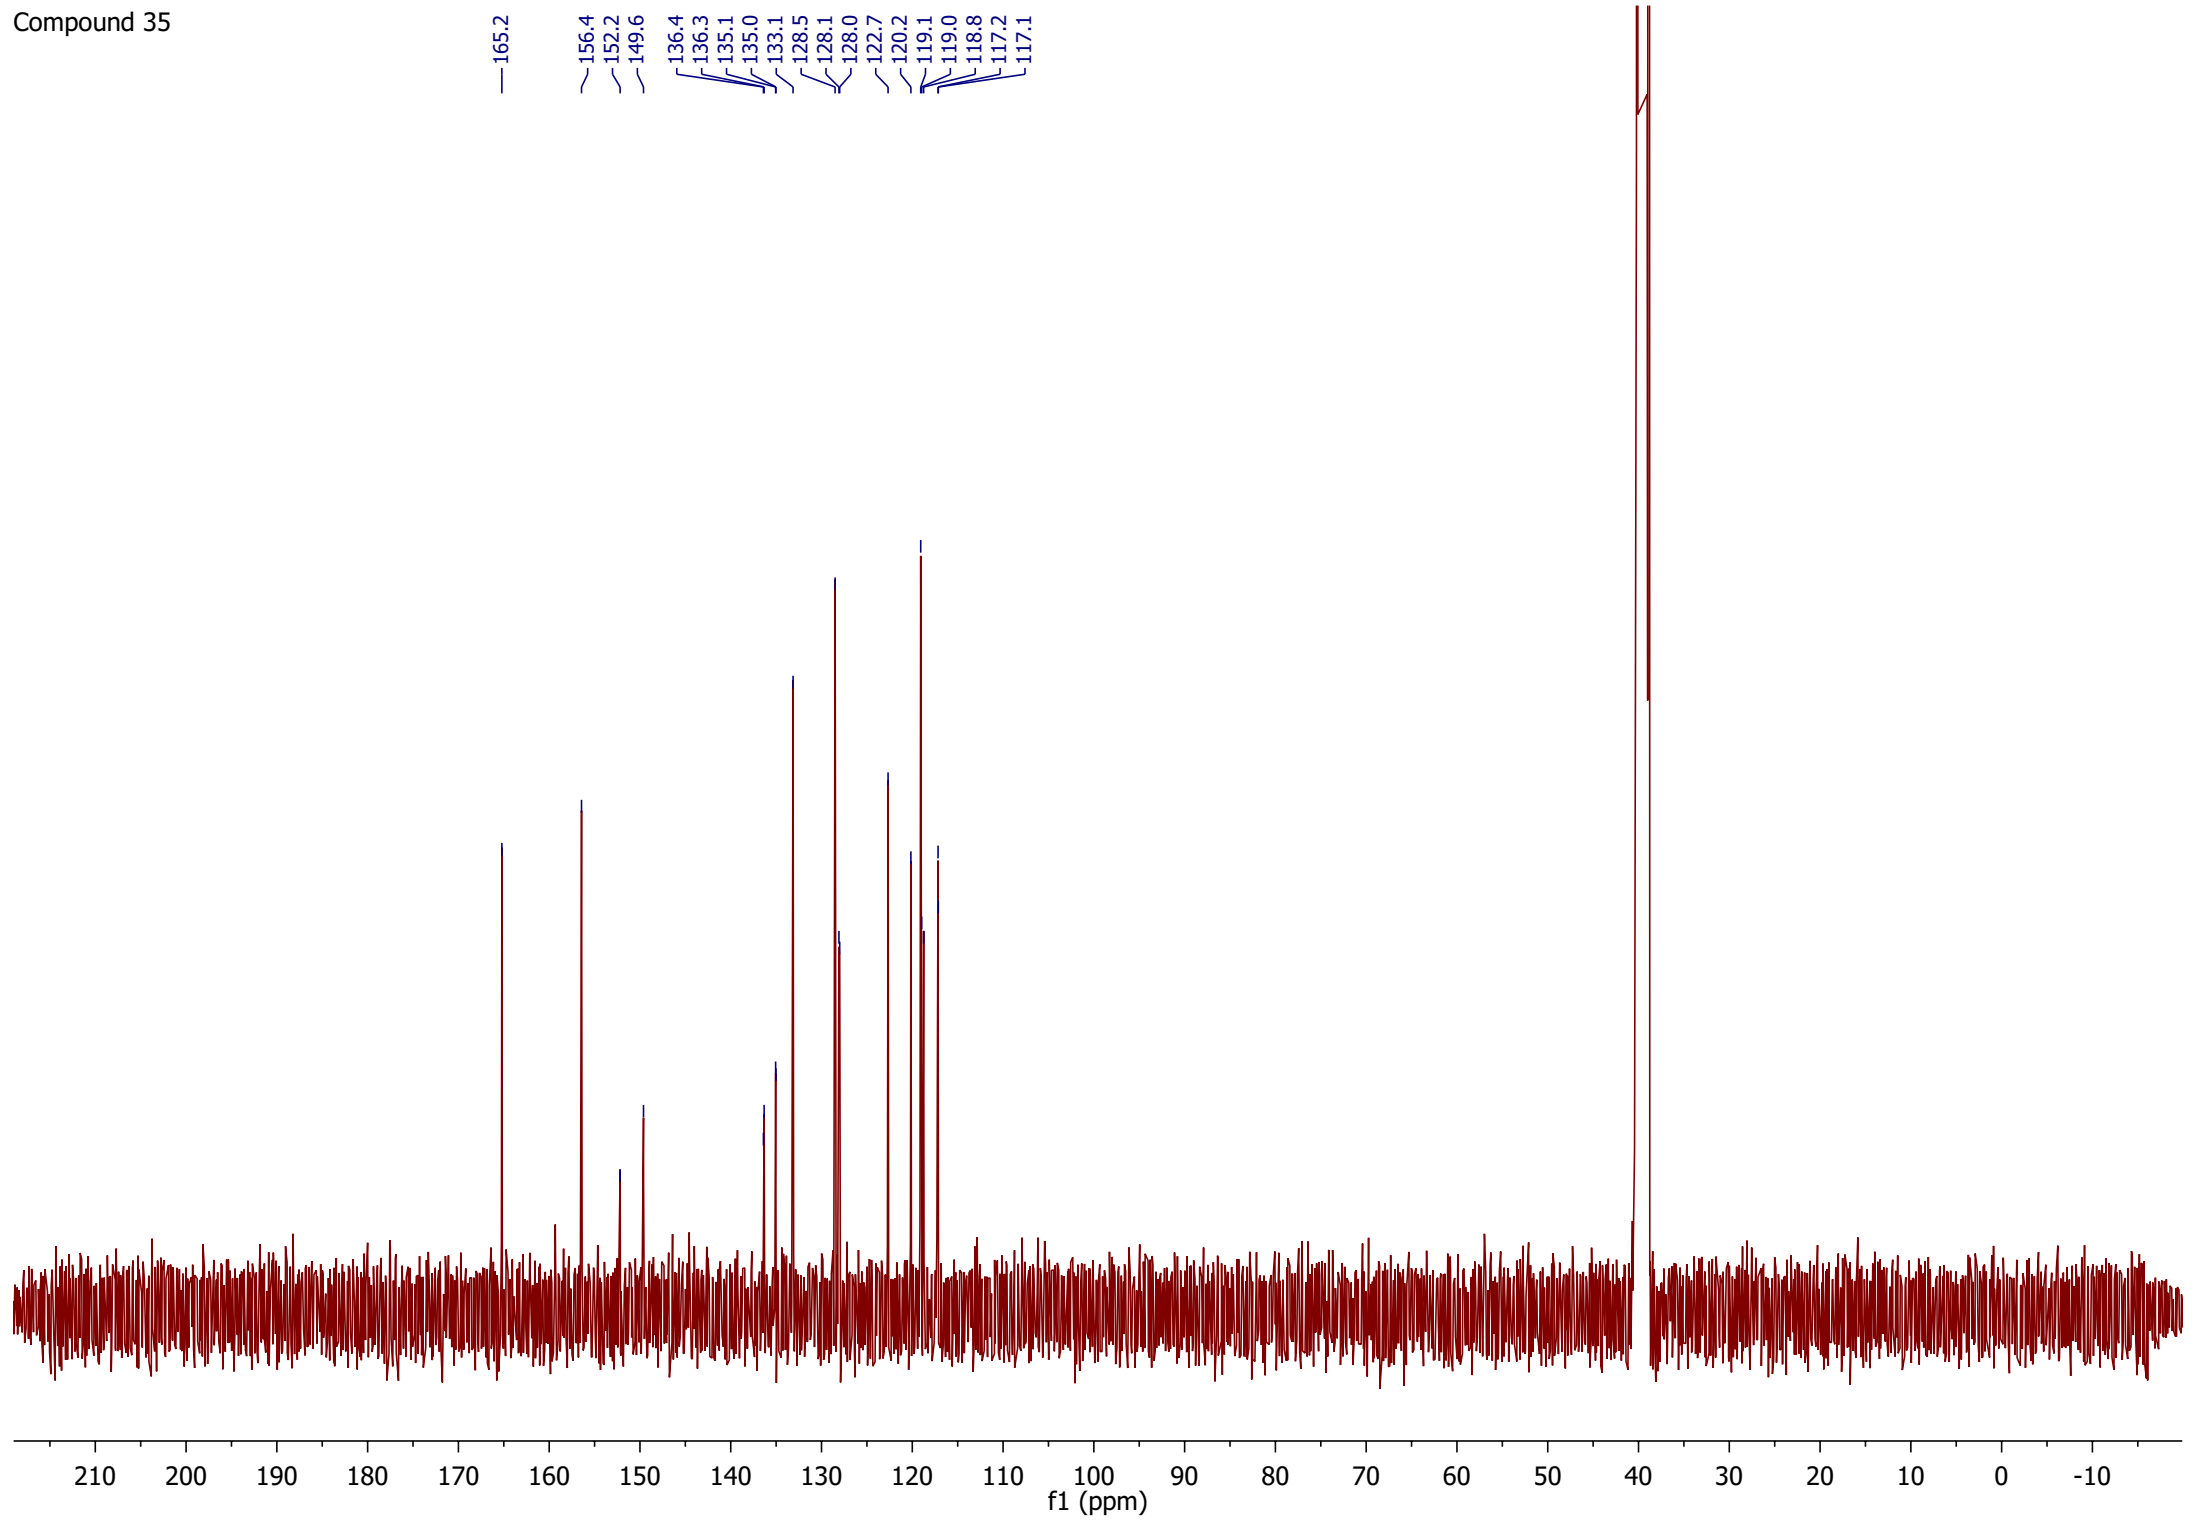

Compound 36

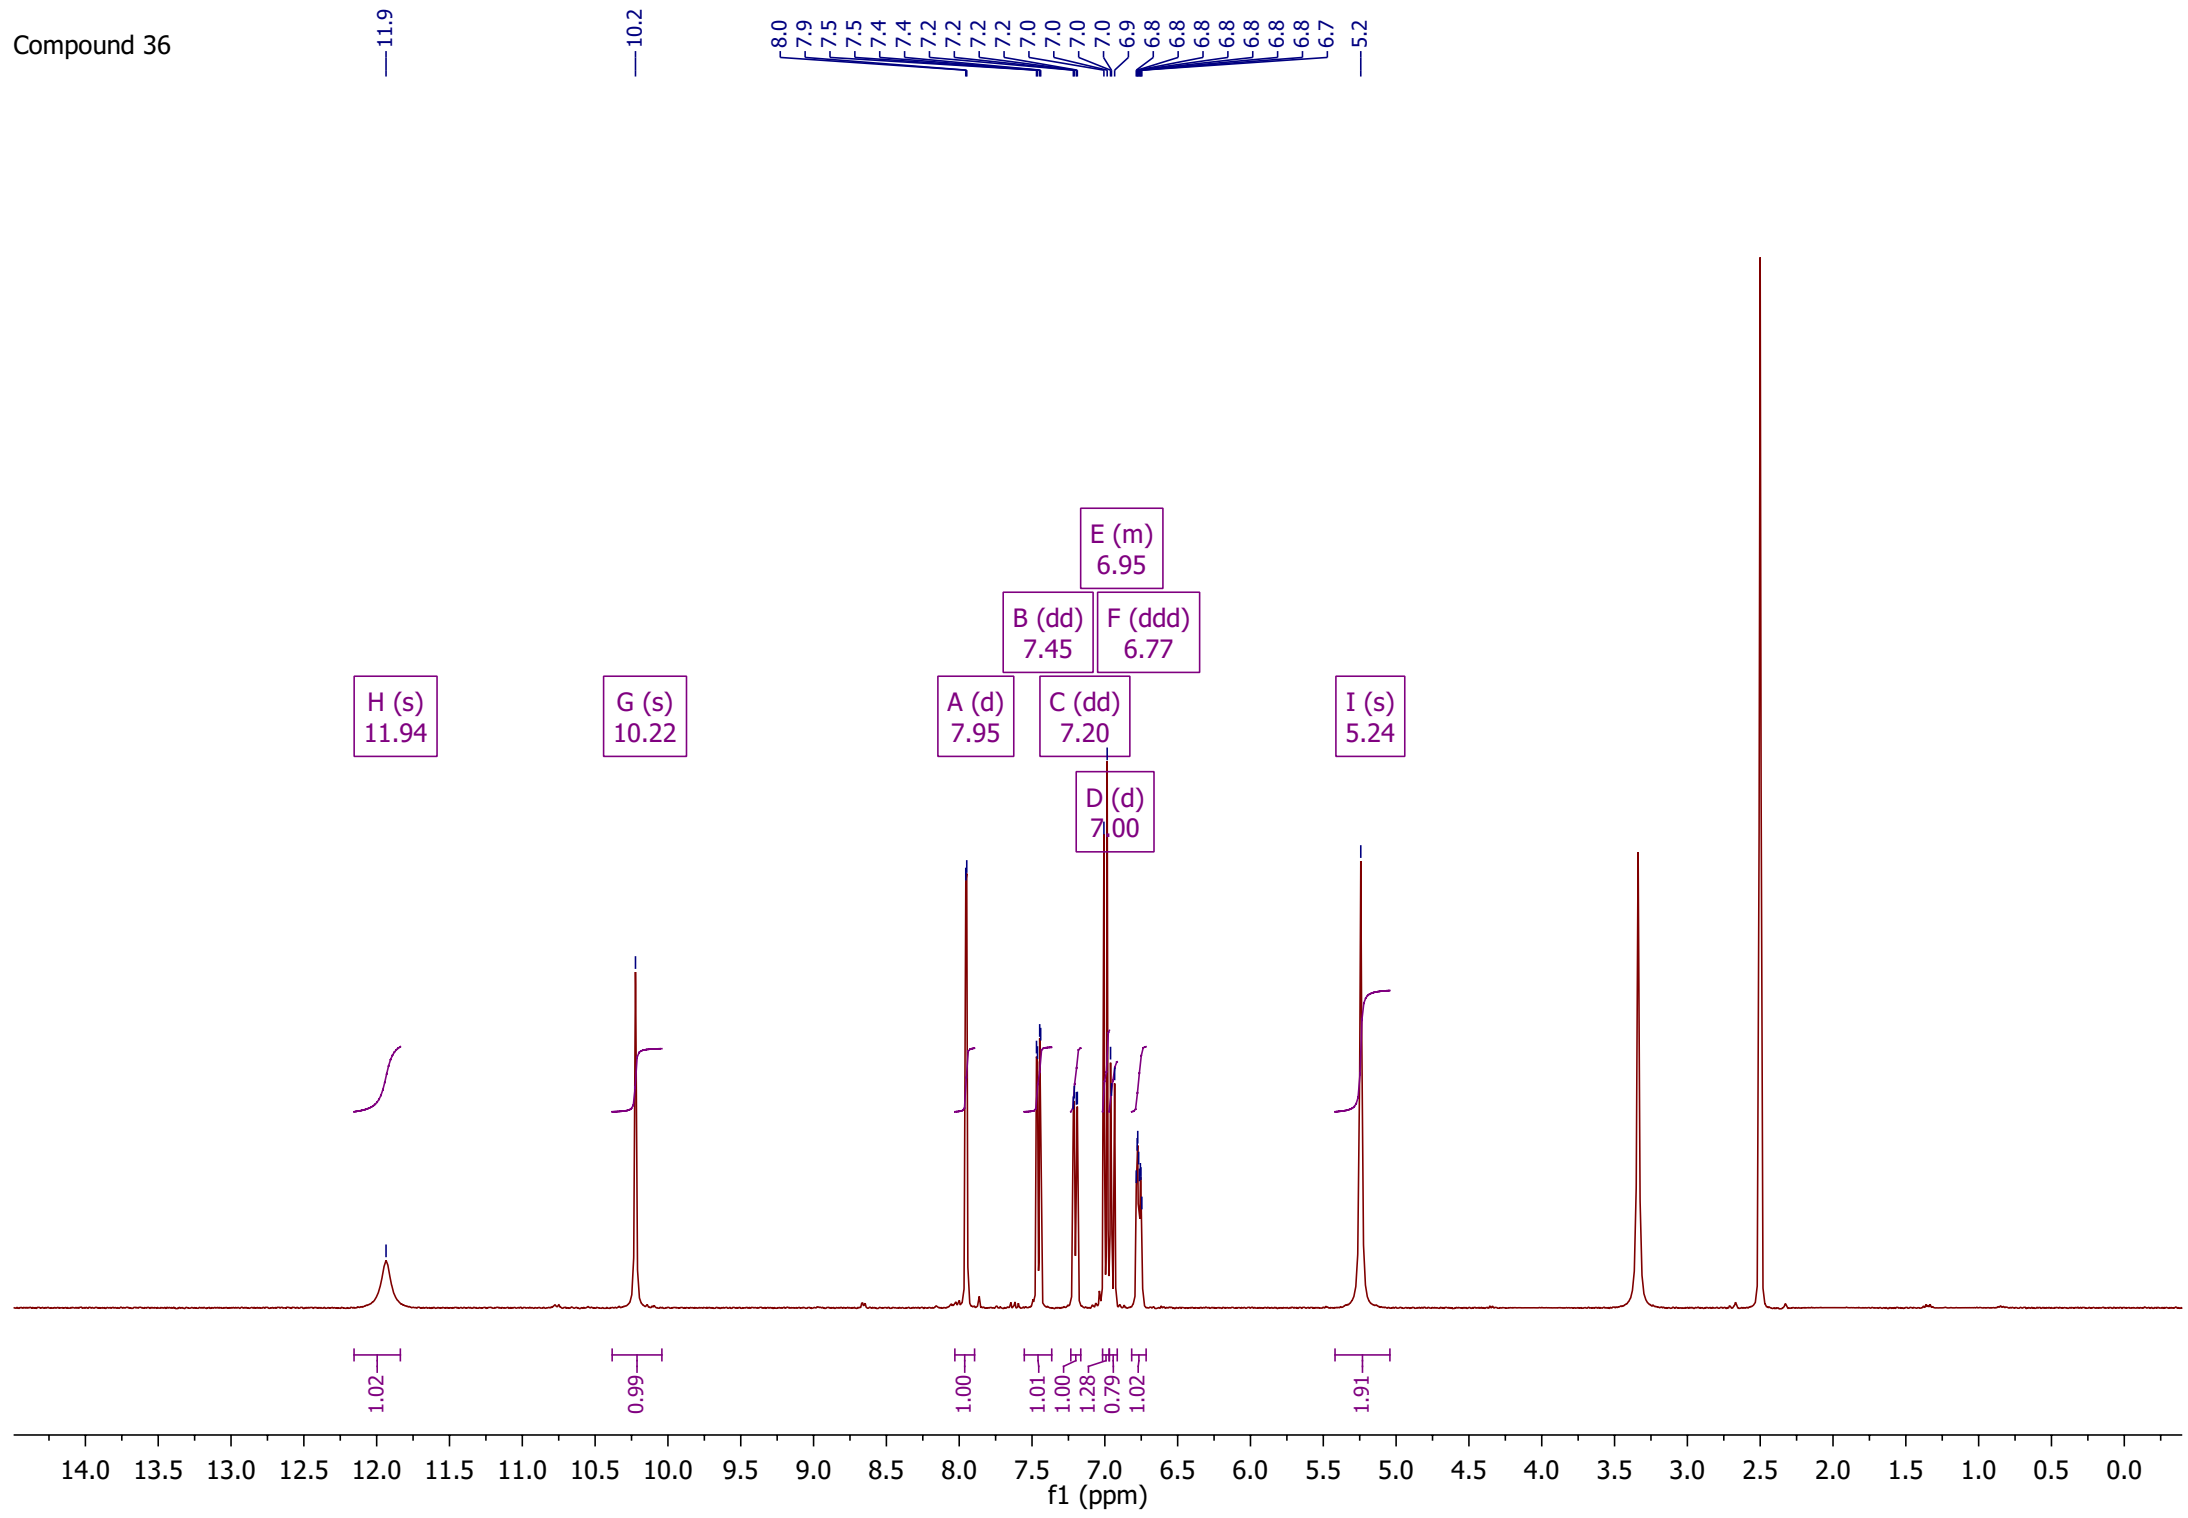

Compound 36

— 165.2  
— 157.5  
— 149.1  
— 146.8  
— 137.0  
— 136.8  
— 134.8  
— 134.8  
— 133.4  
— 128.7  
— 123.1  
— 119.9  
— 119.6  
— 115.2  
— 115.0  
— 109.3  
— 109.2  
— 109.0  
— 108.9

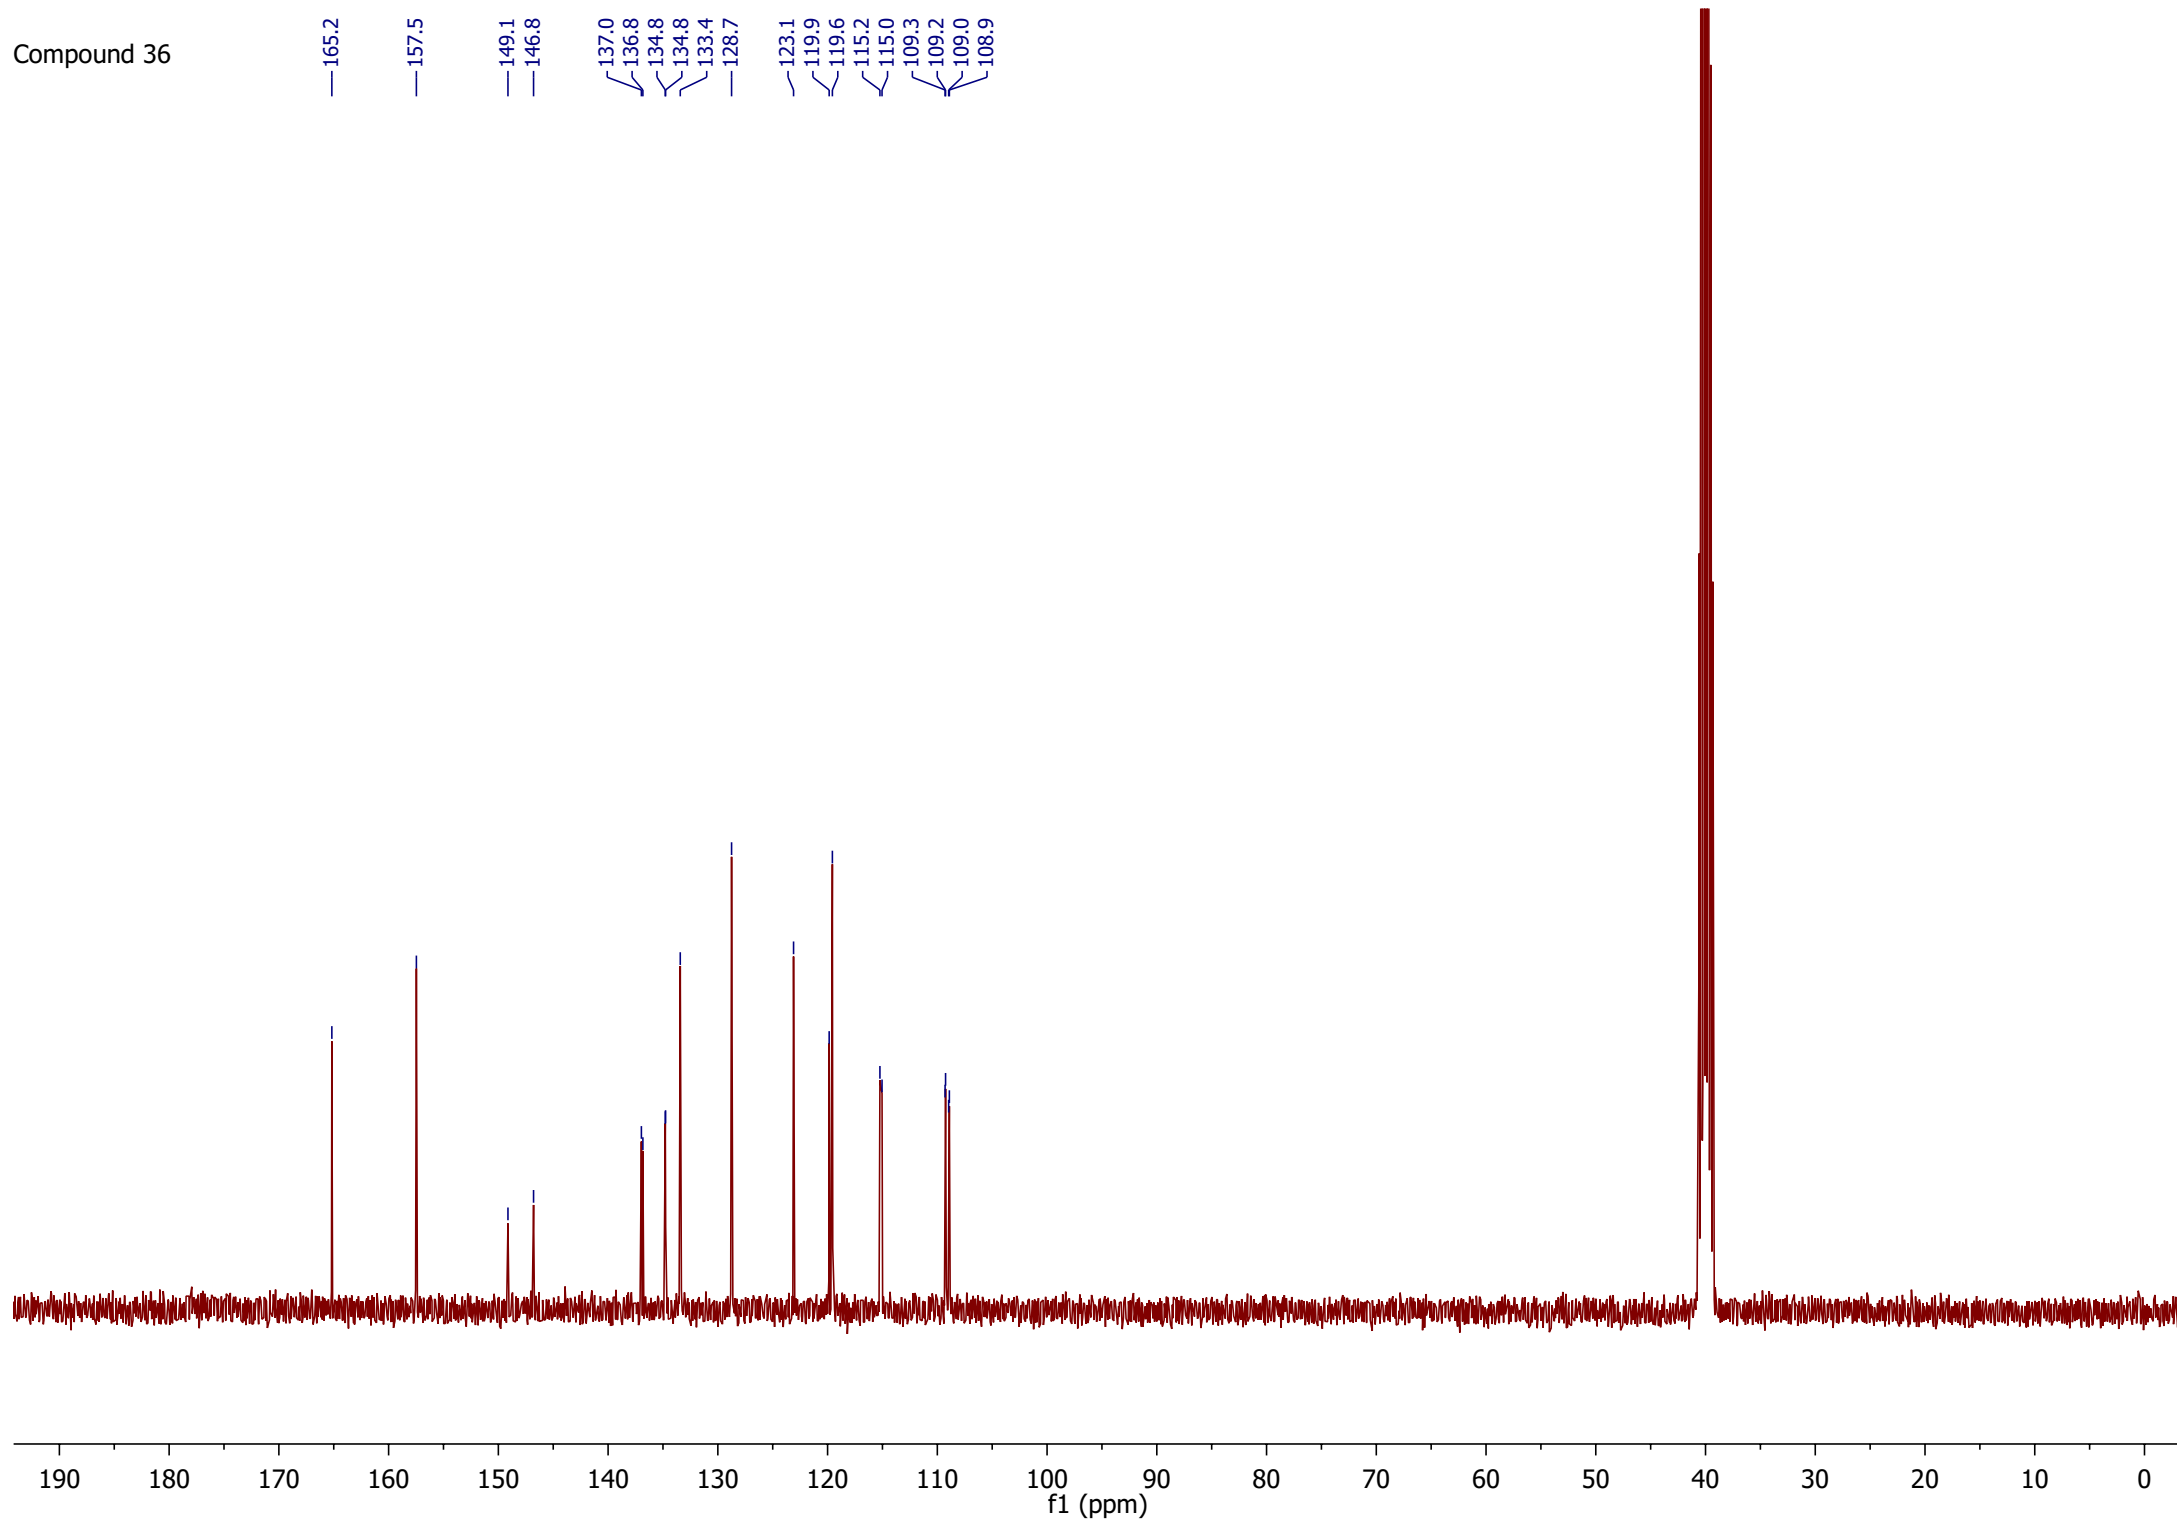

Compound 38

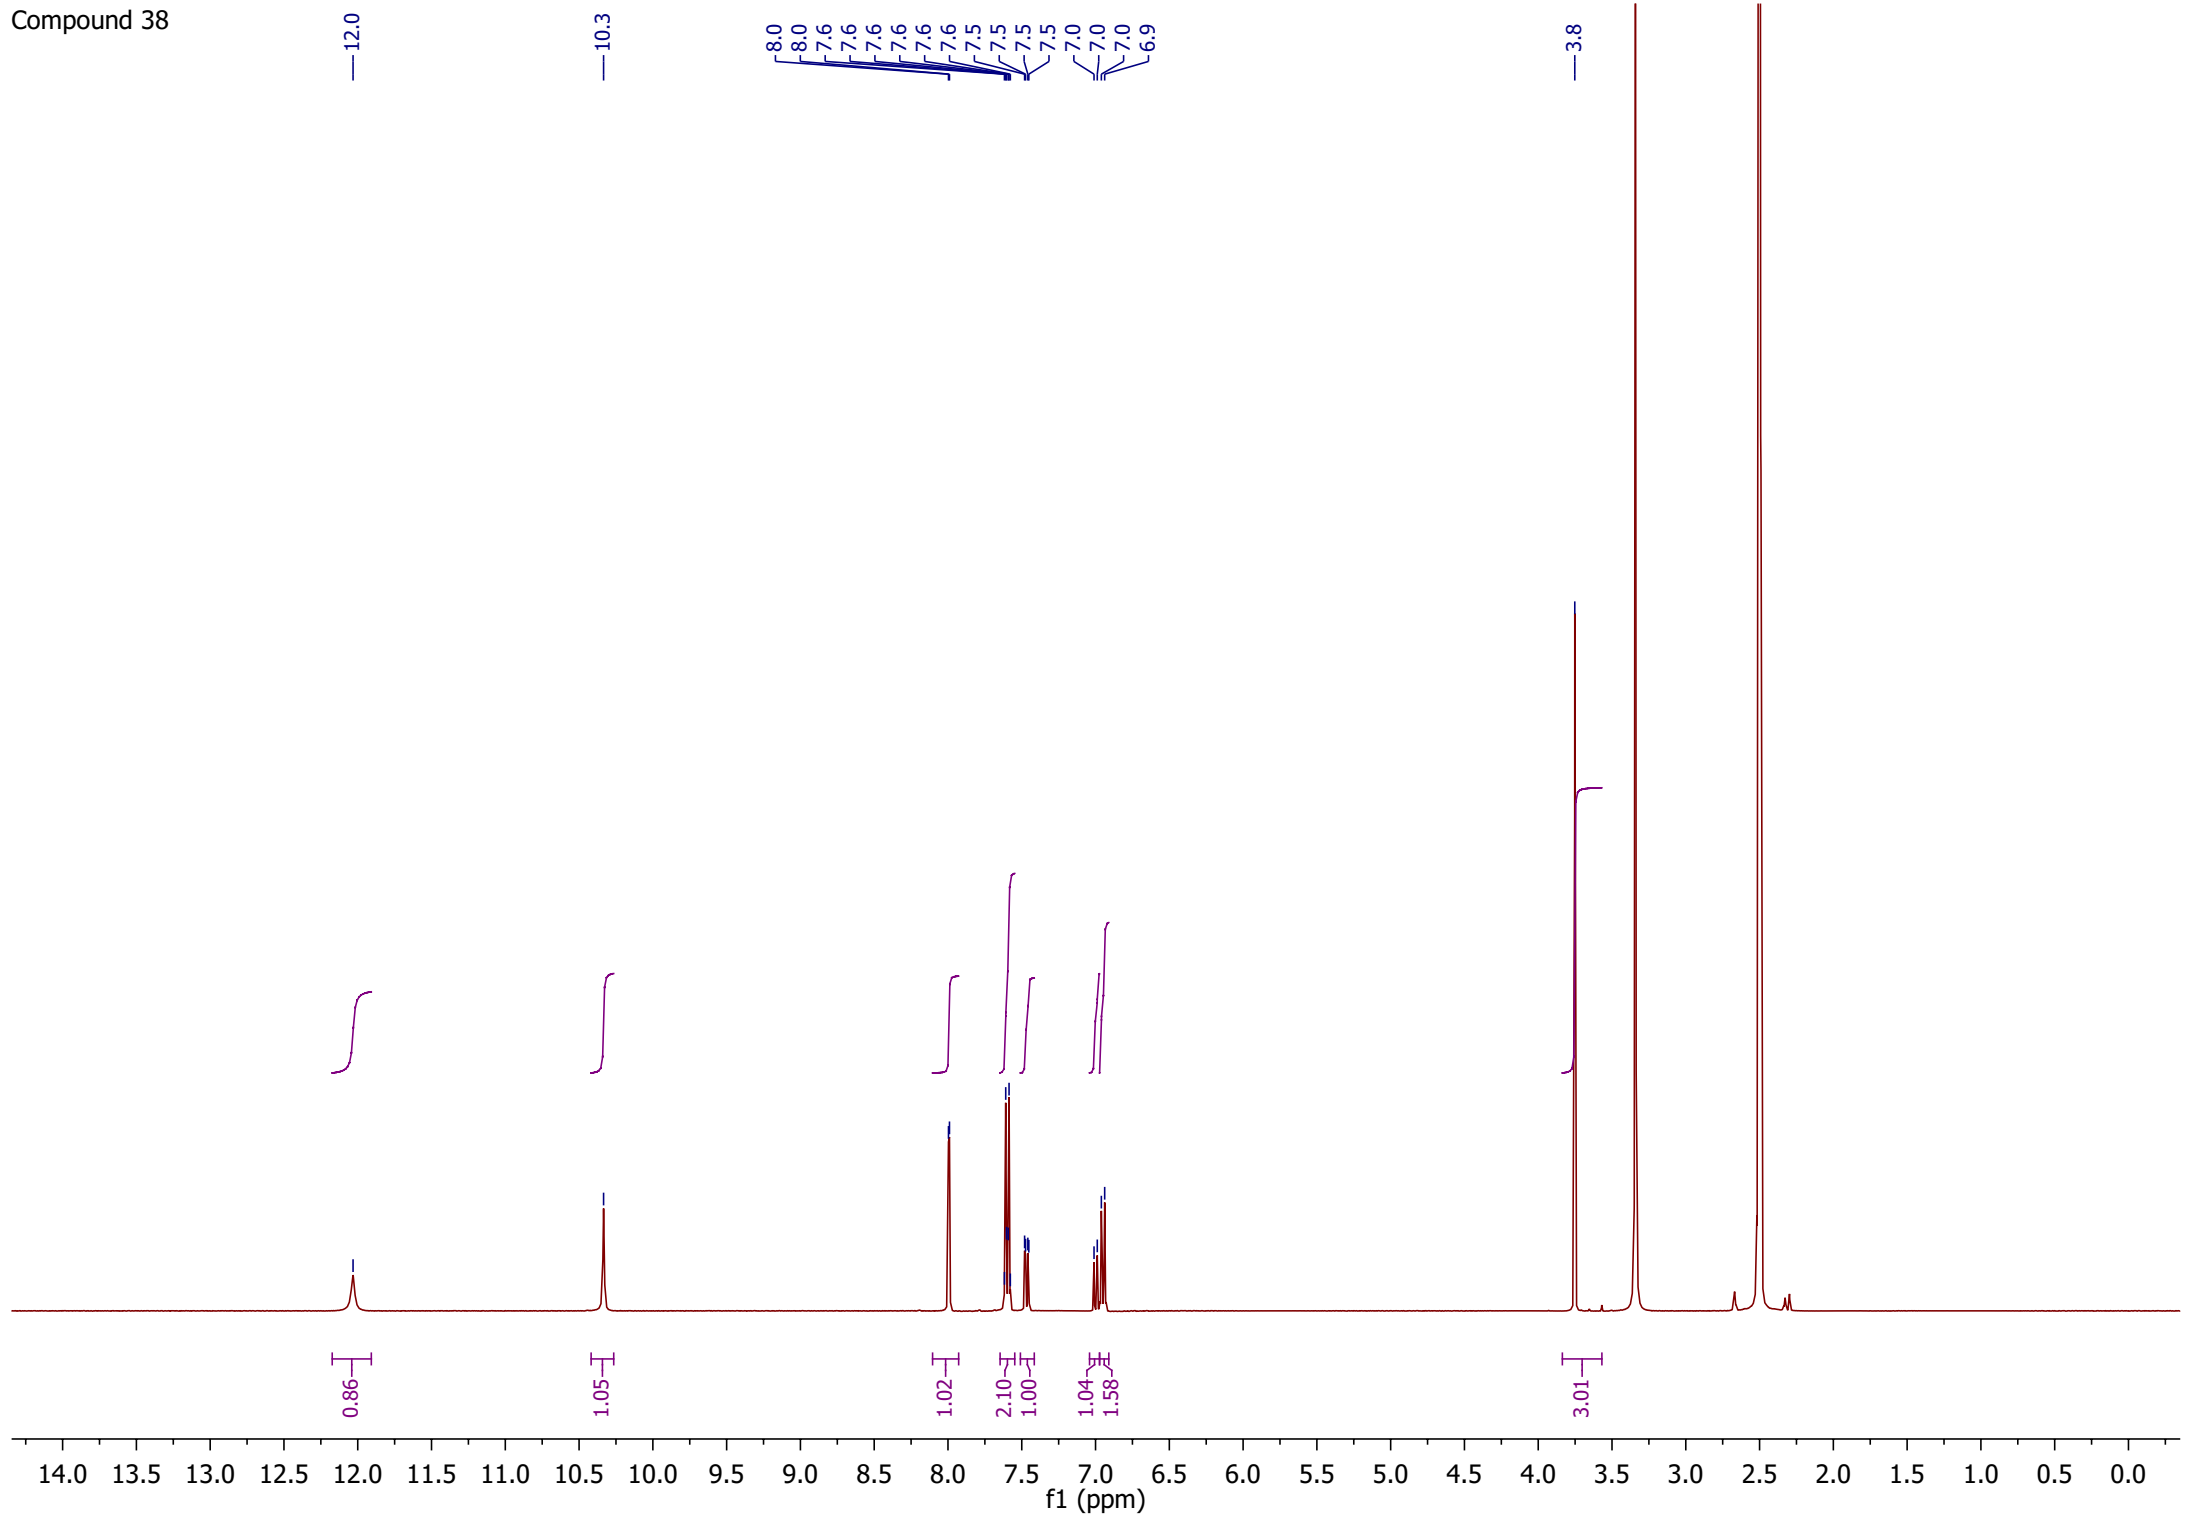



Compound 38

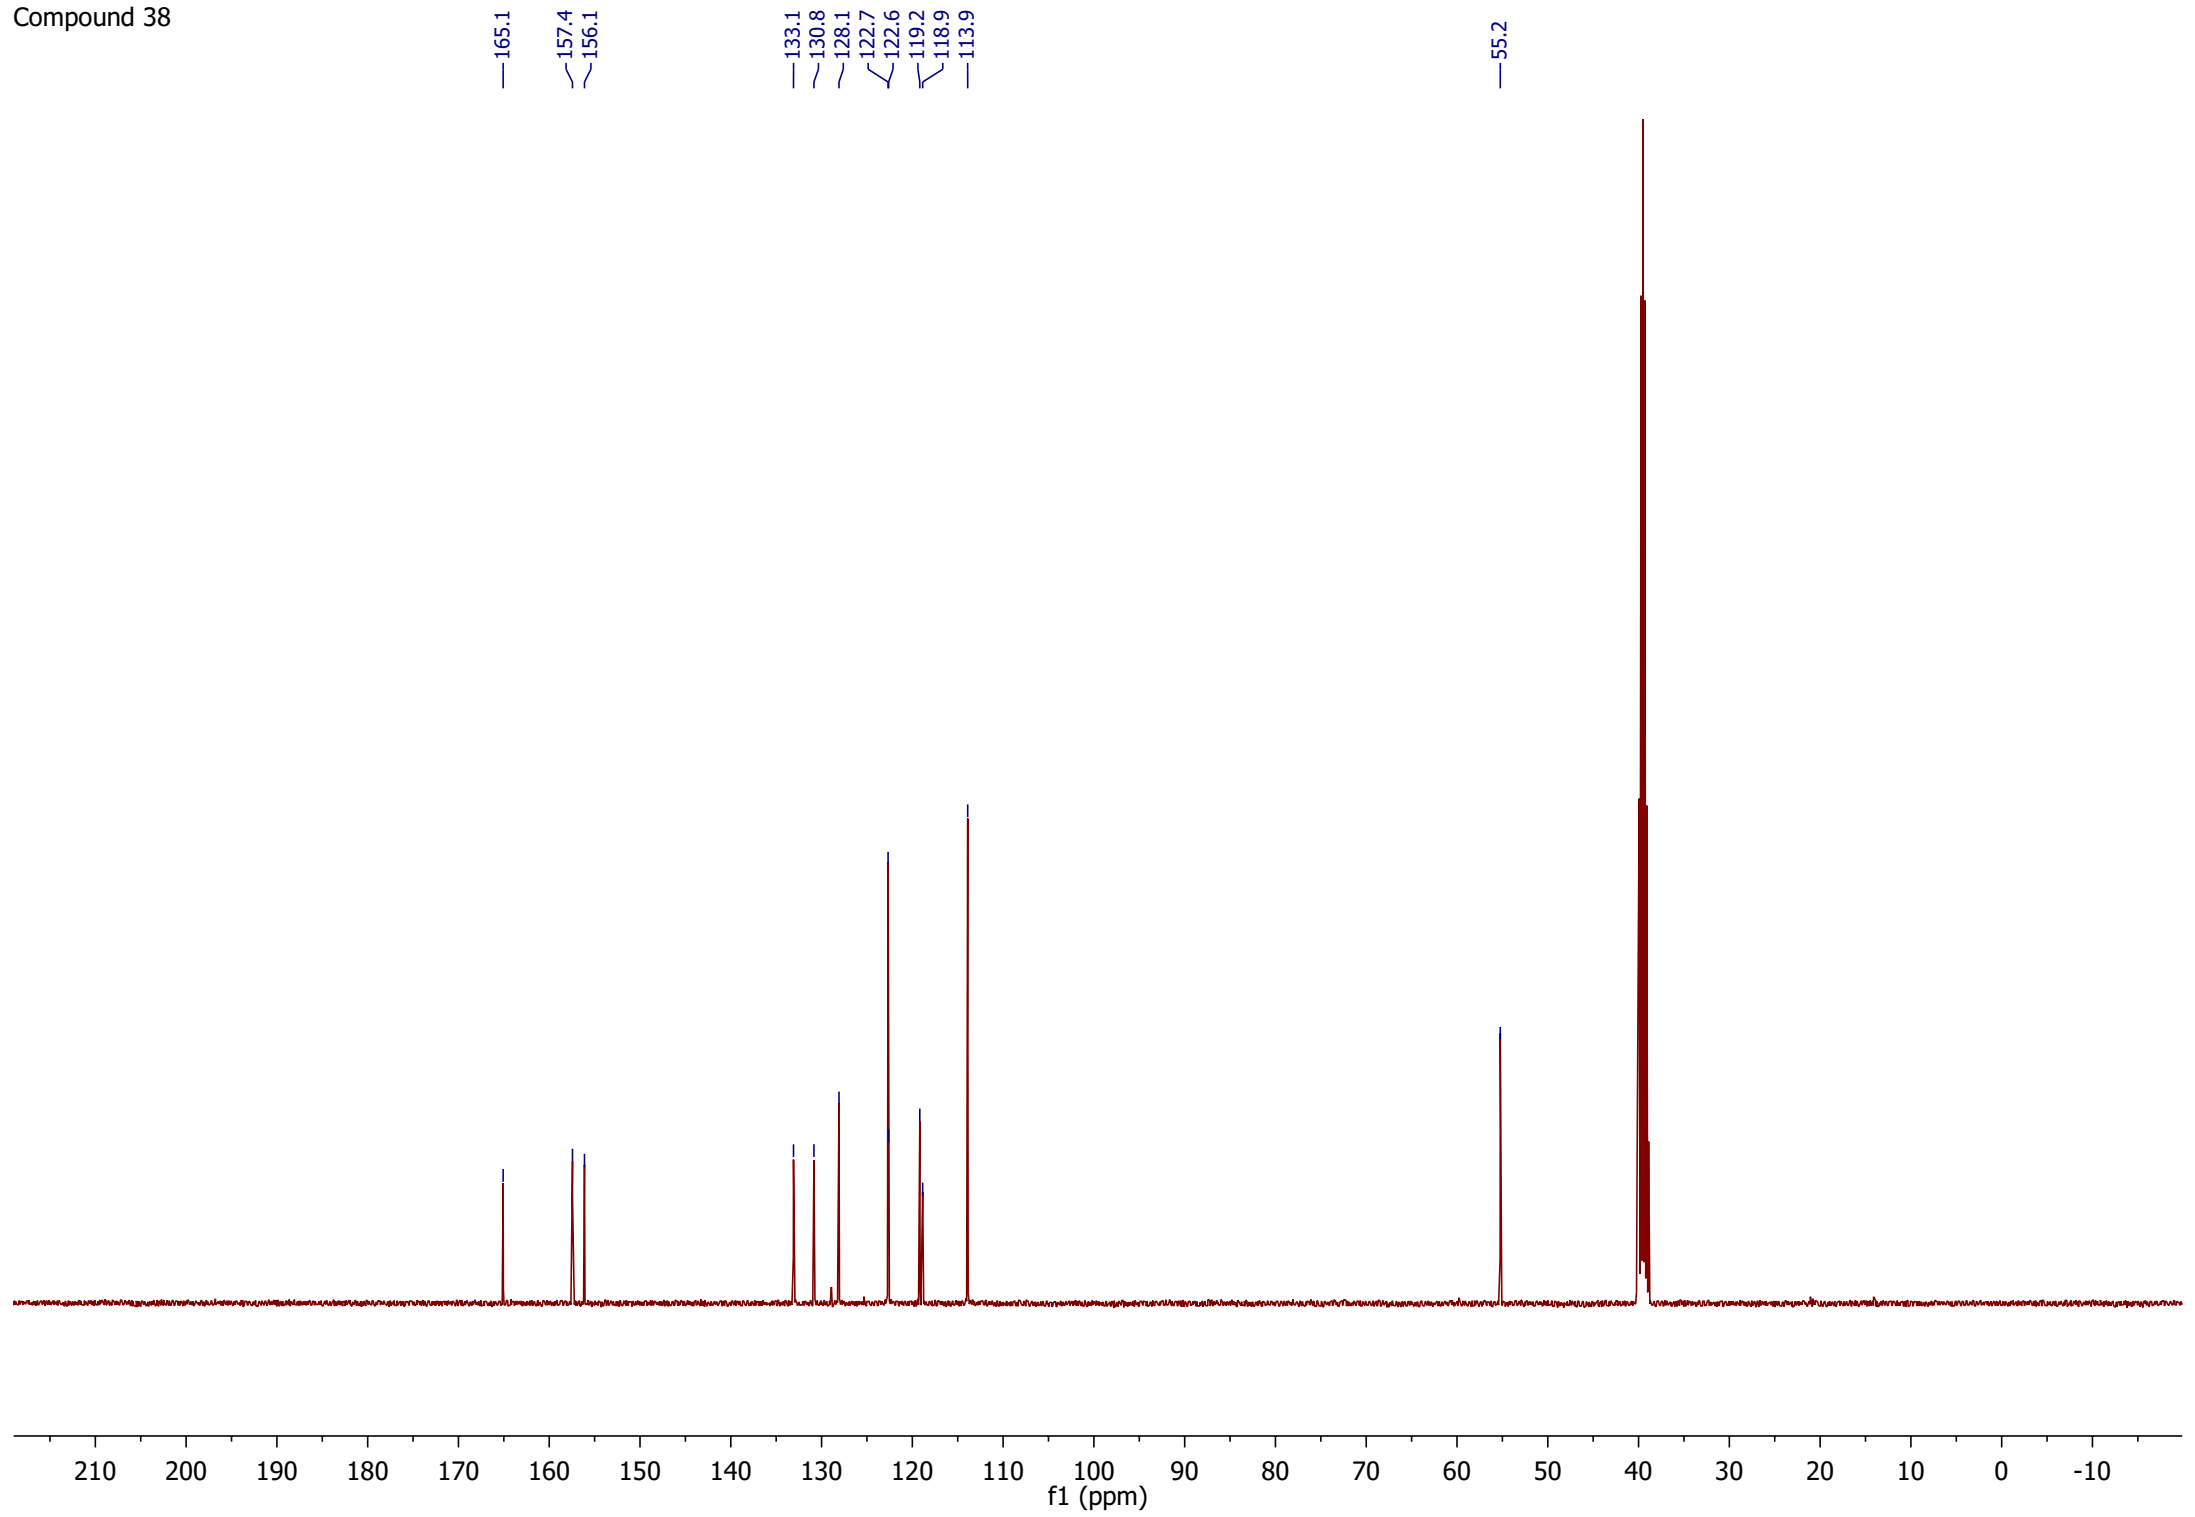

Compound 41

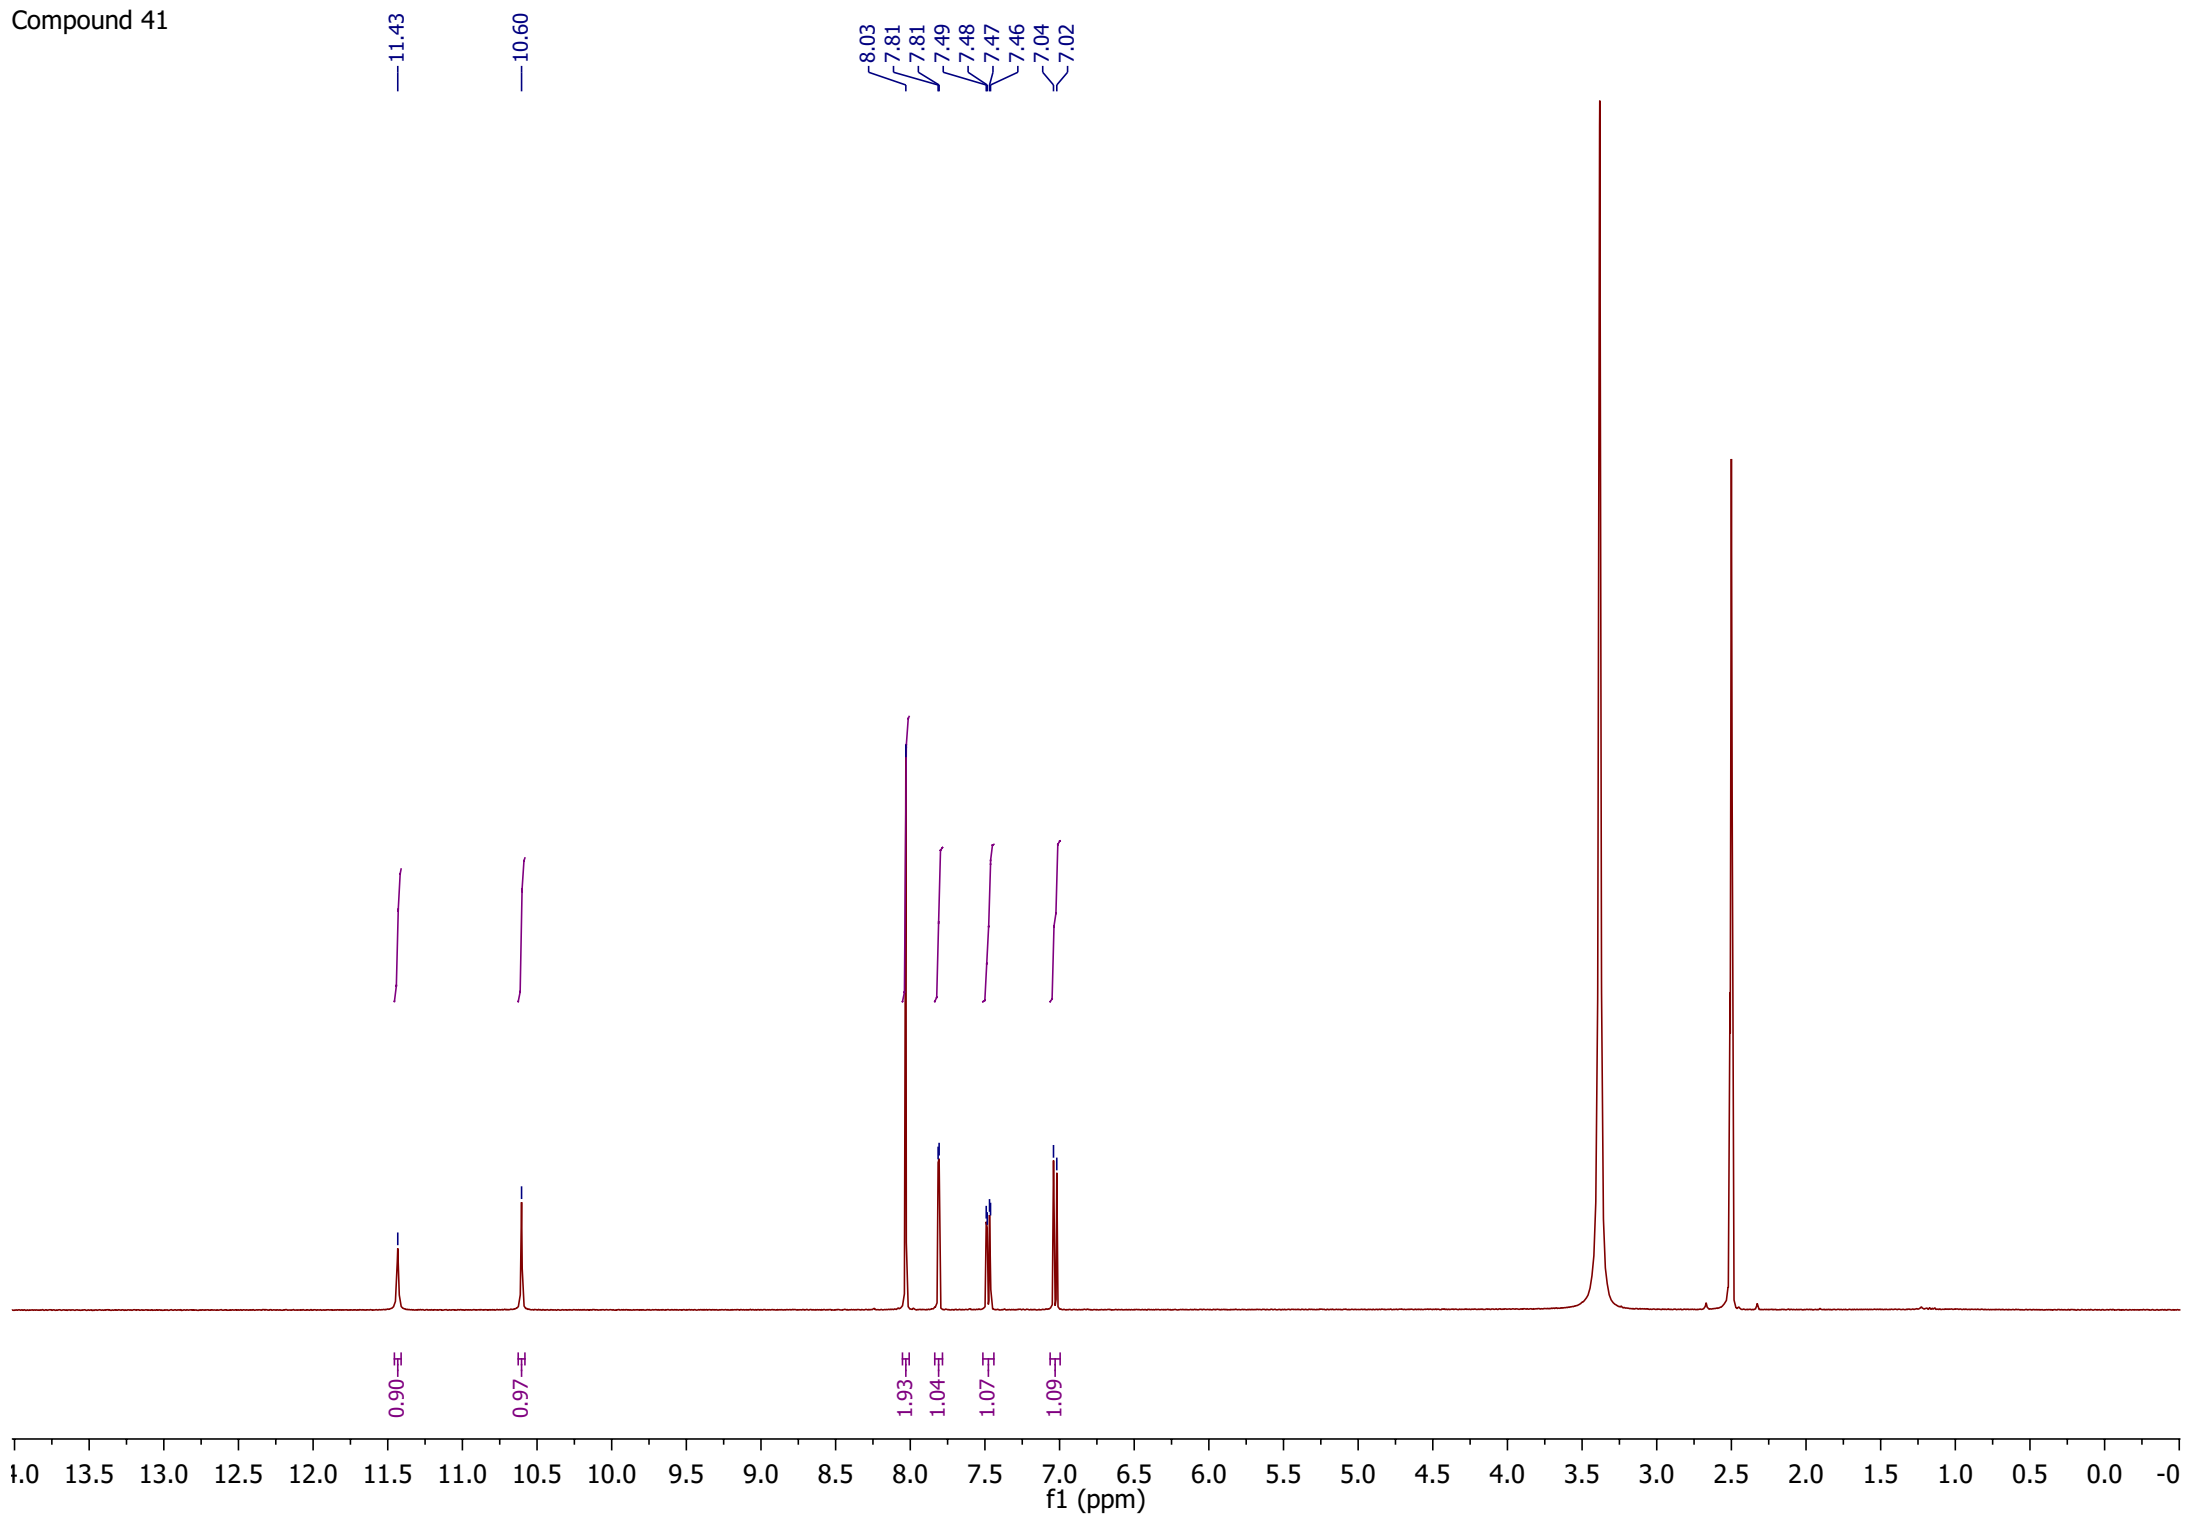

Compound 41

165.1

156.0

139.1

135.1

133.2

128.7

122.8

120.5

120.2

119.0

116.1

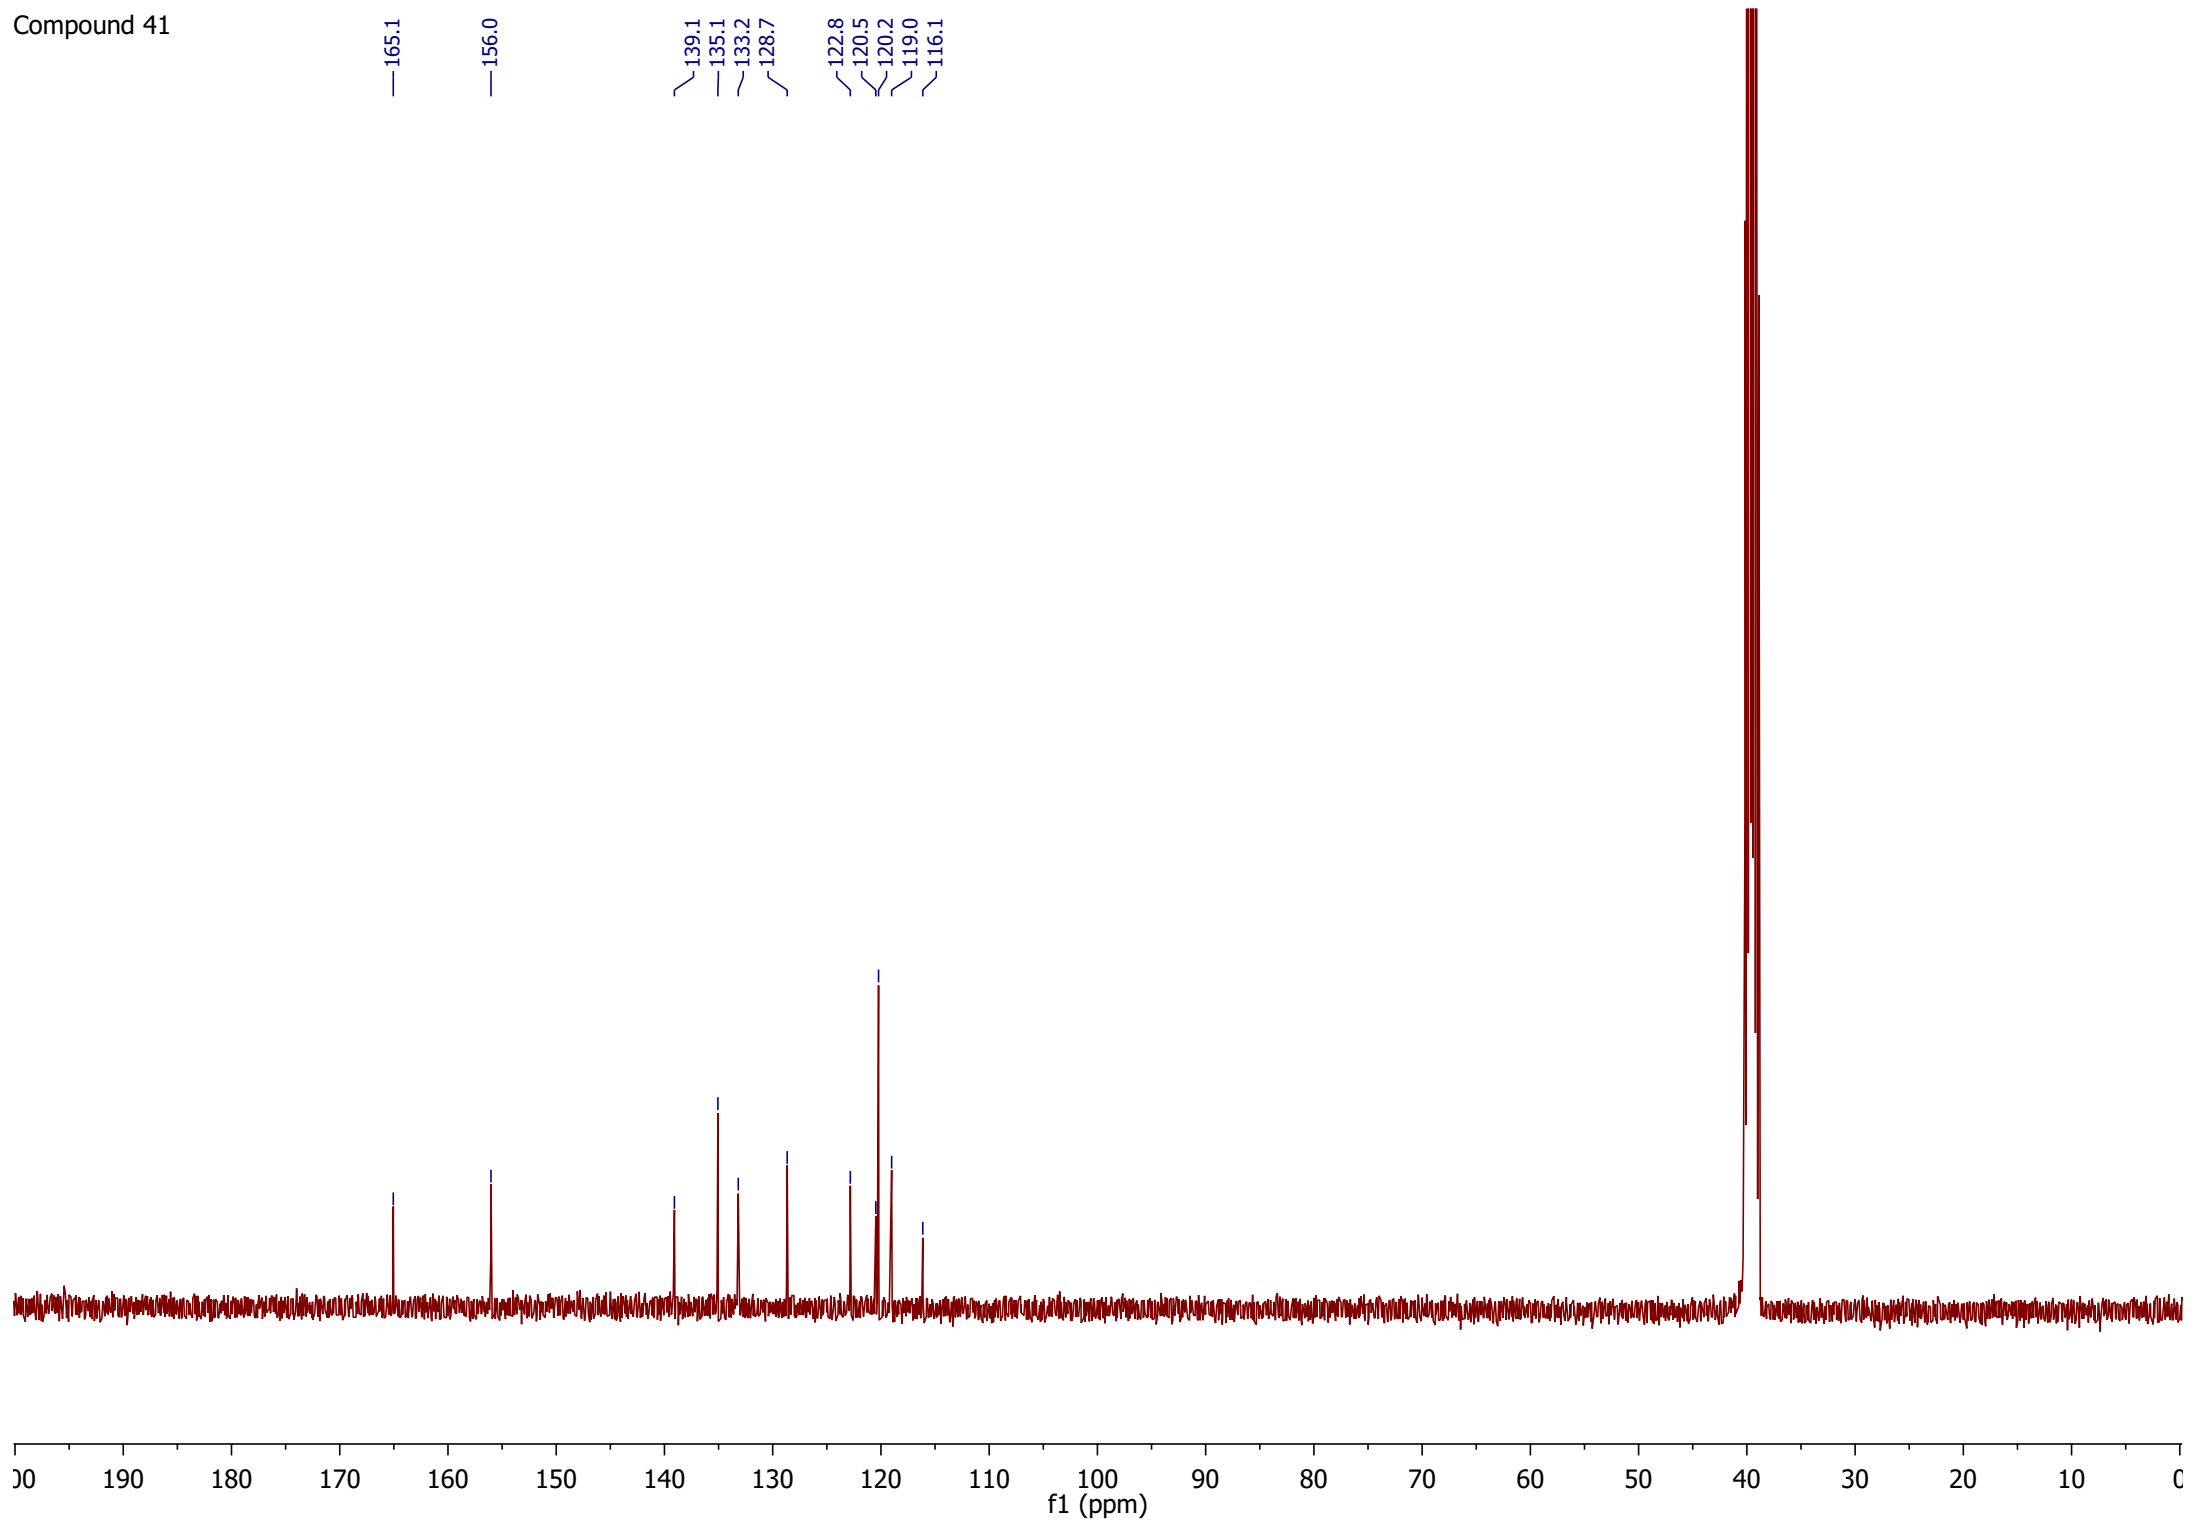

Compound 42

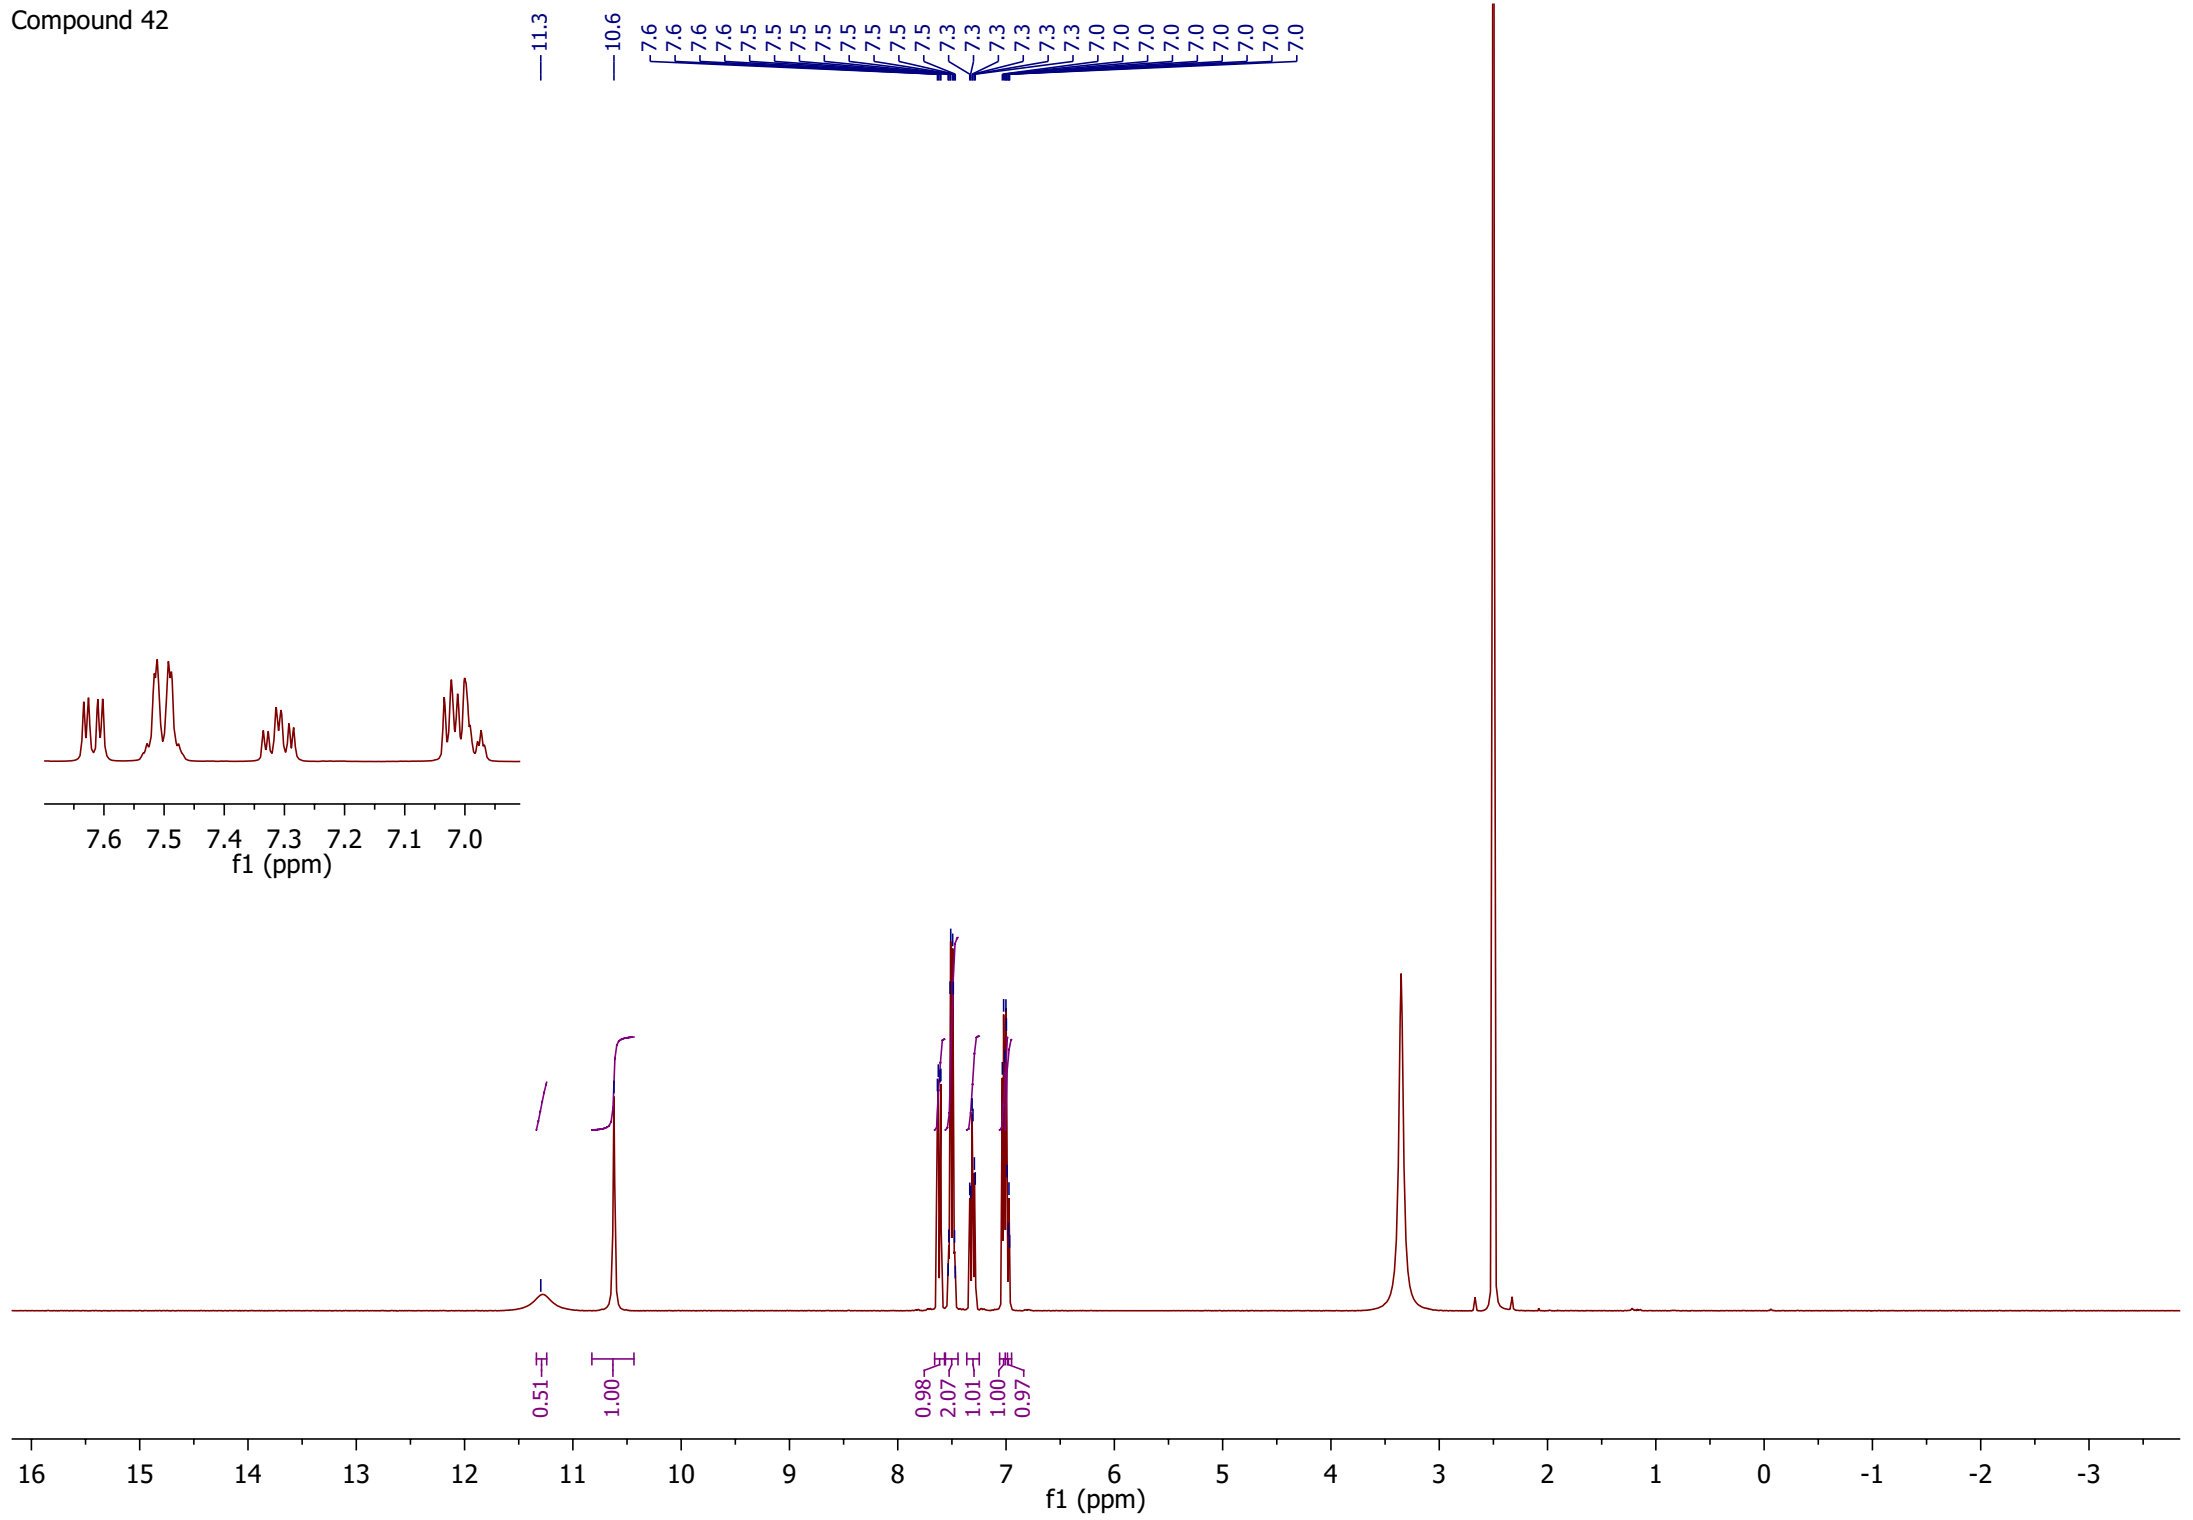

Compound 42

165.0  
165.0  
163.7  
163.5  
161.3  
161.1  
156.1  
153.8  
153.5  
  
140.9  
140.8  
140.7  
  
120.6  
120.3  
119.5  
119.5  
118.5  
118.5  
115.2  
115.0  
103.4  
103.4  
103.2  
103.1  
99.5  
99.2  
99.0

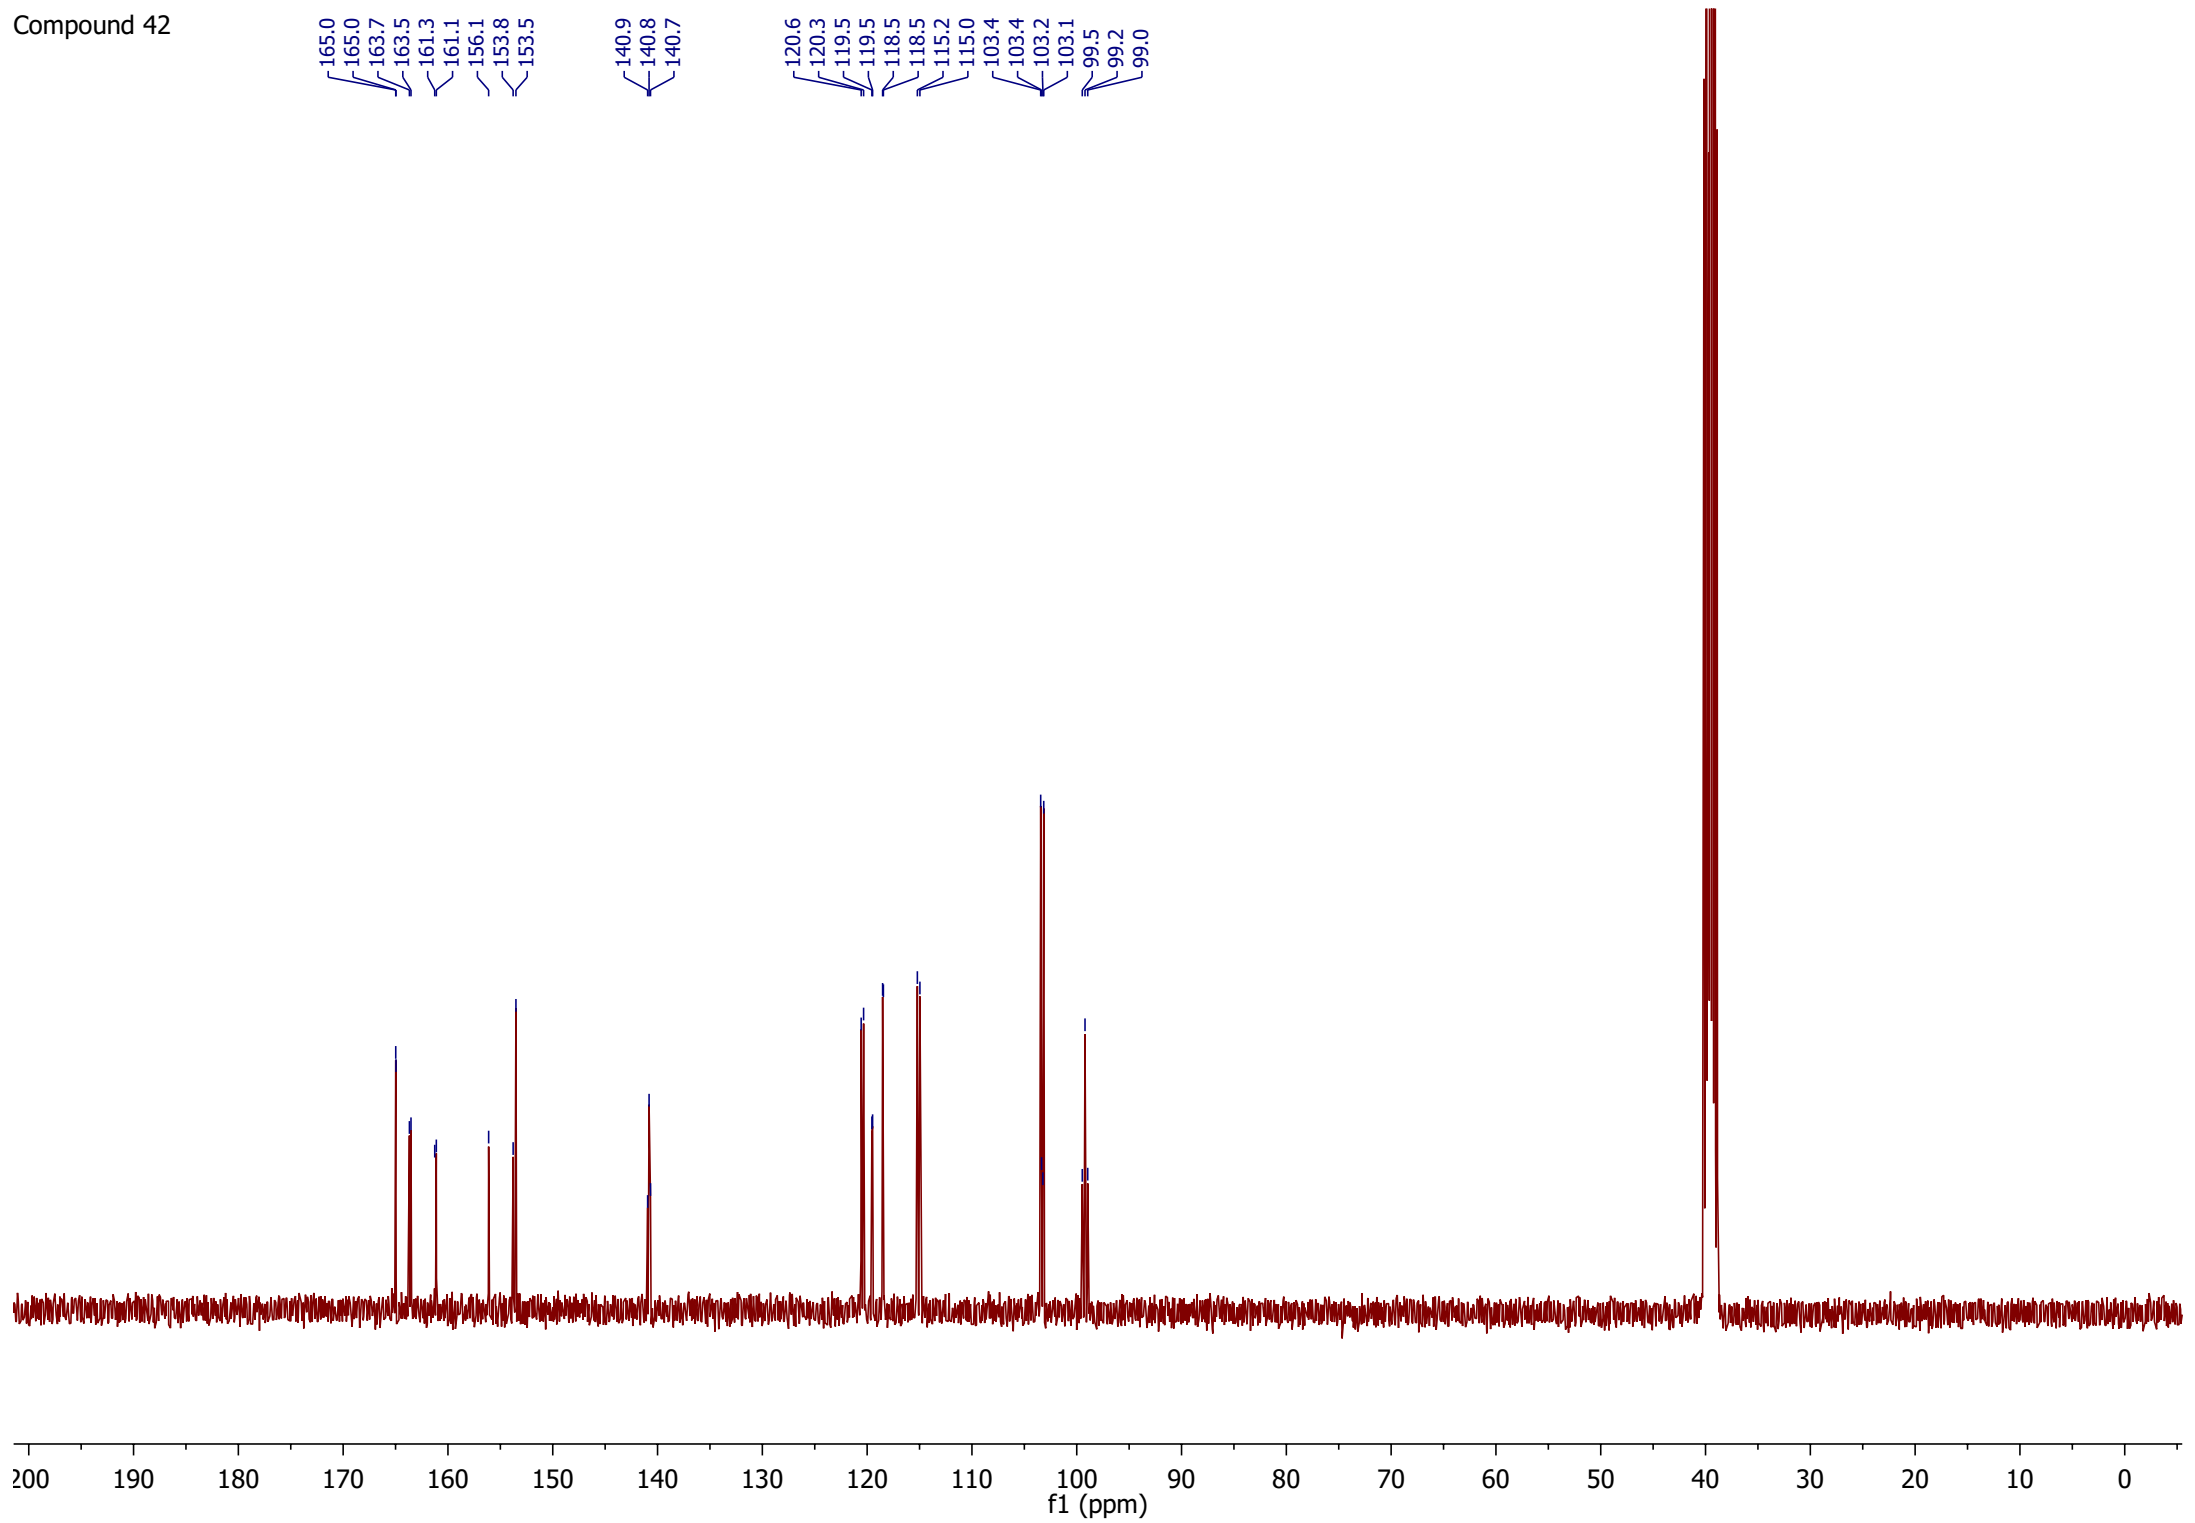

Compound 43

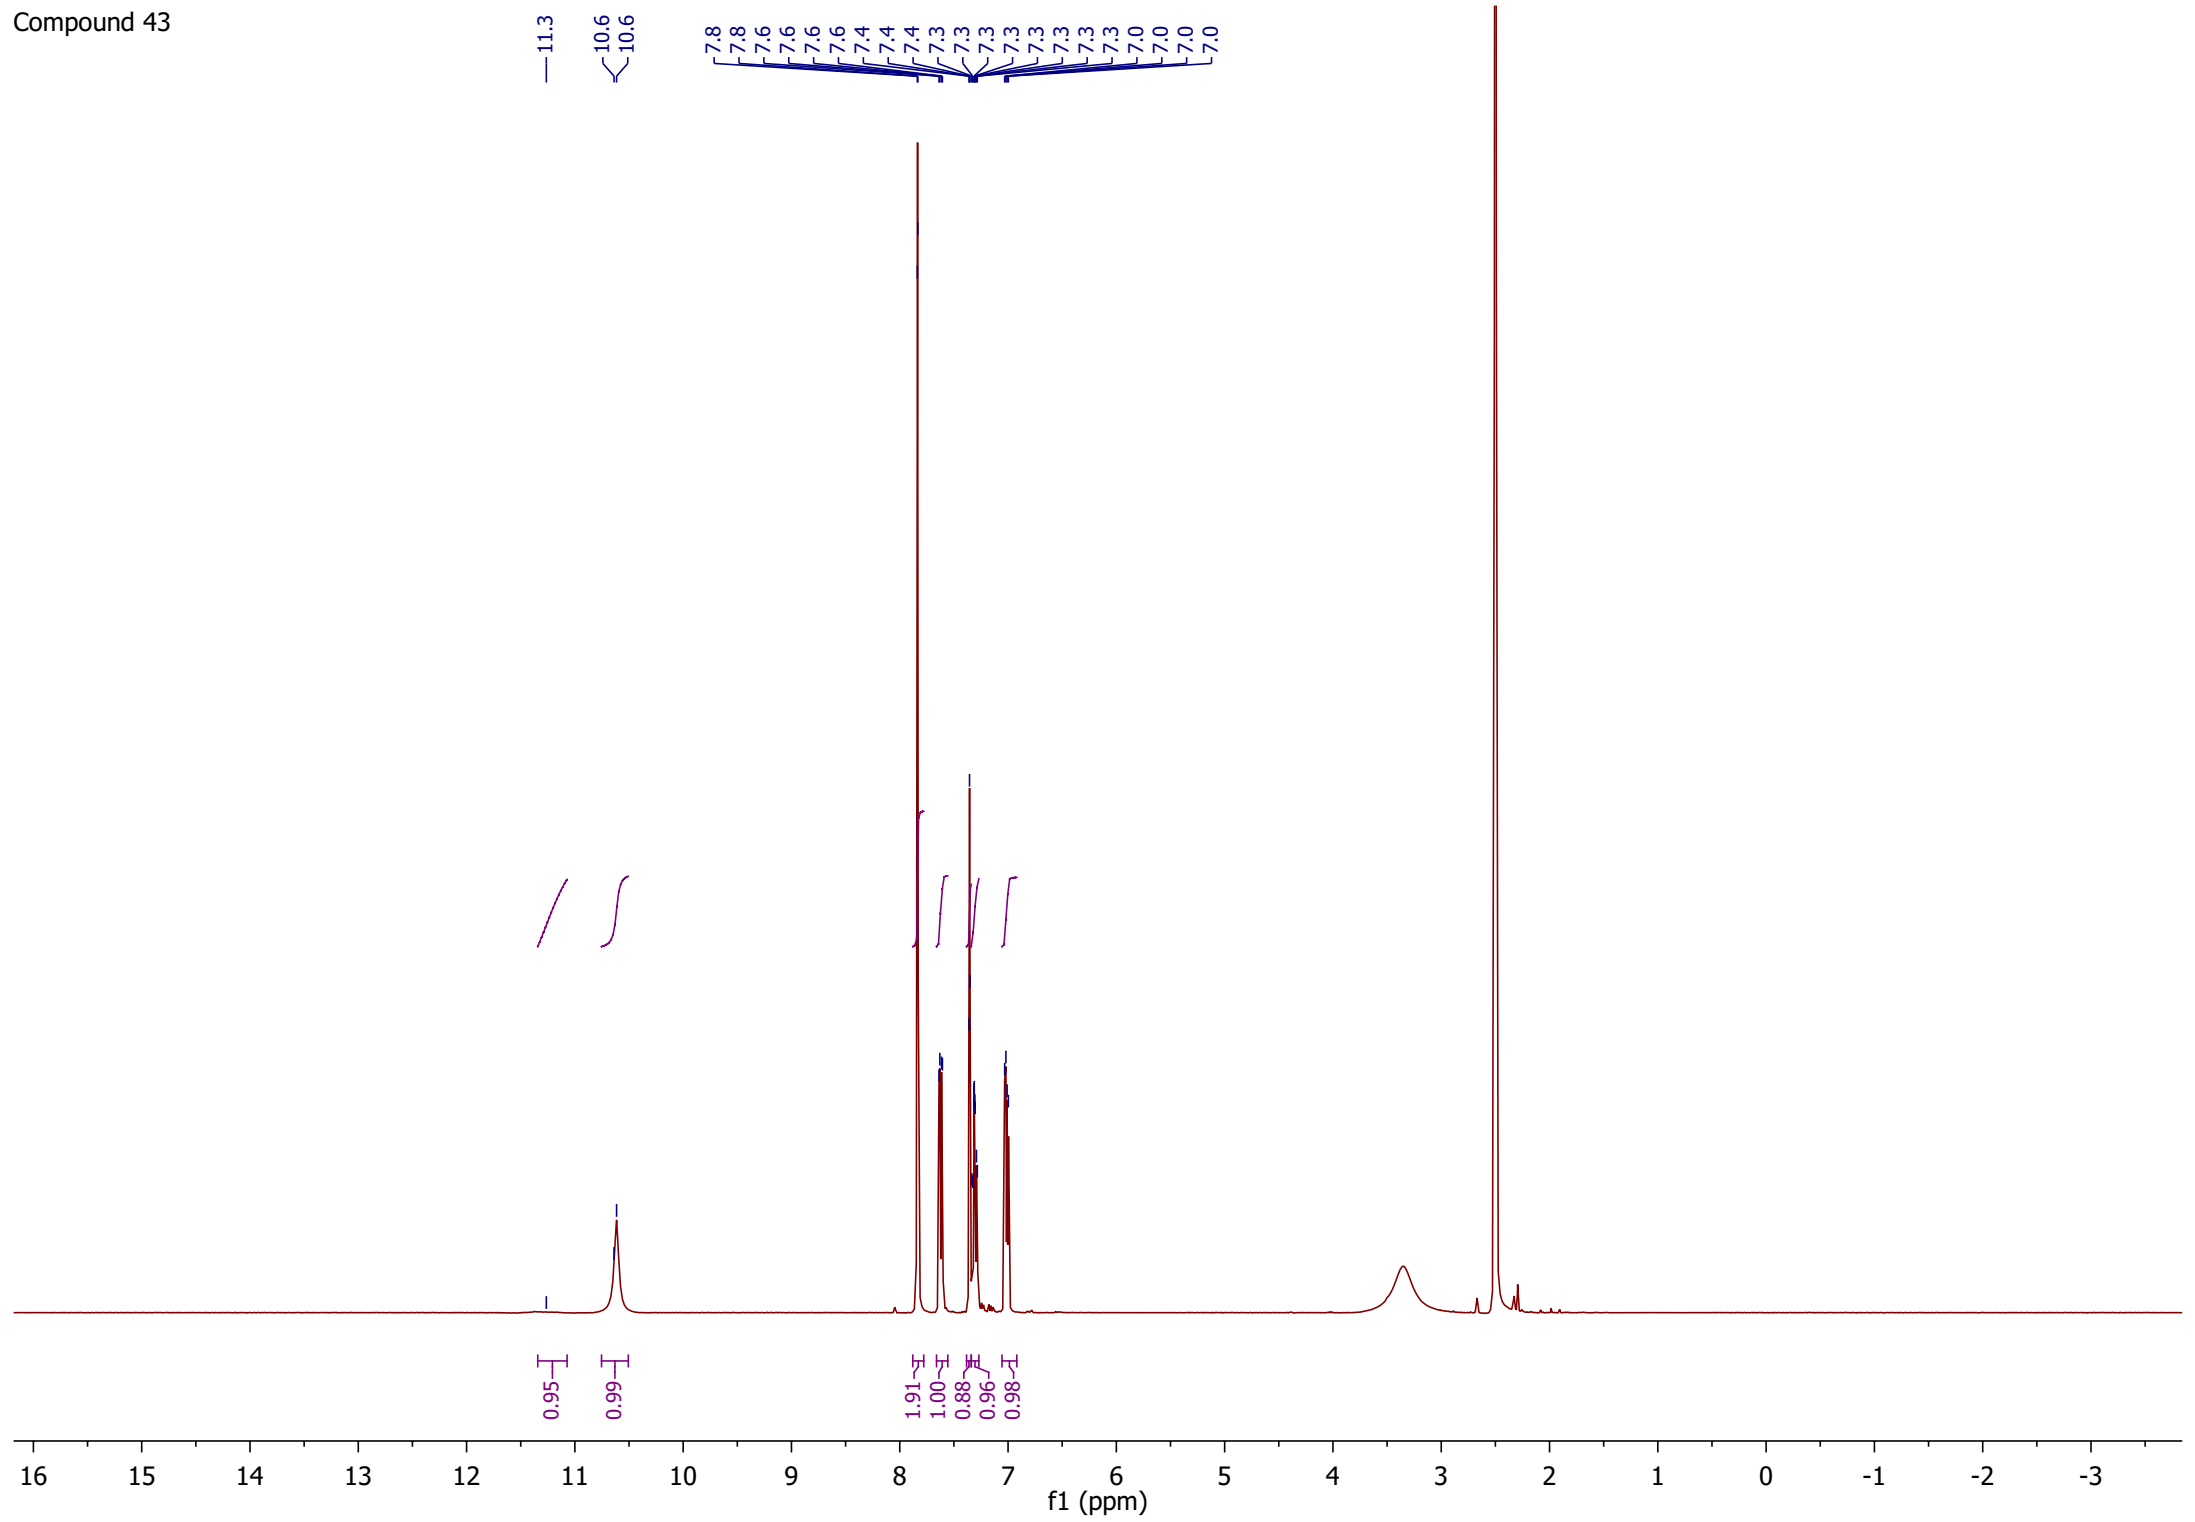

Compound 43

165.5  
165.5  
156.5  
154.2  
154.2  
141.1  
134.5  
123.7  
121.1  
120.9  
119.8  
119.7  
119.0  
119.0  
118.9  
115.6  
115.3

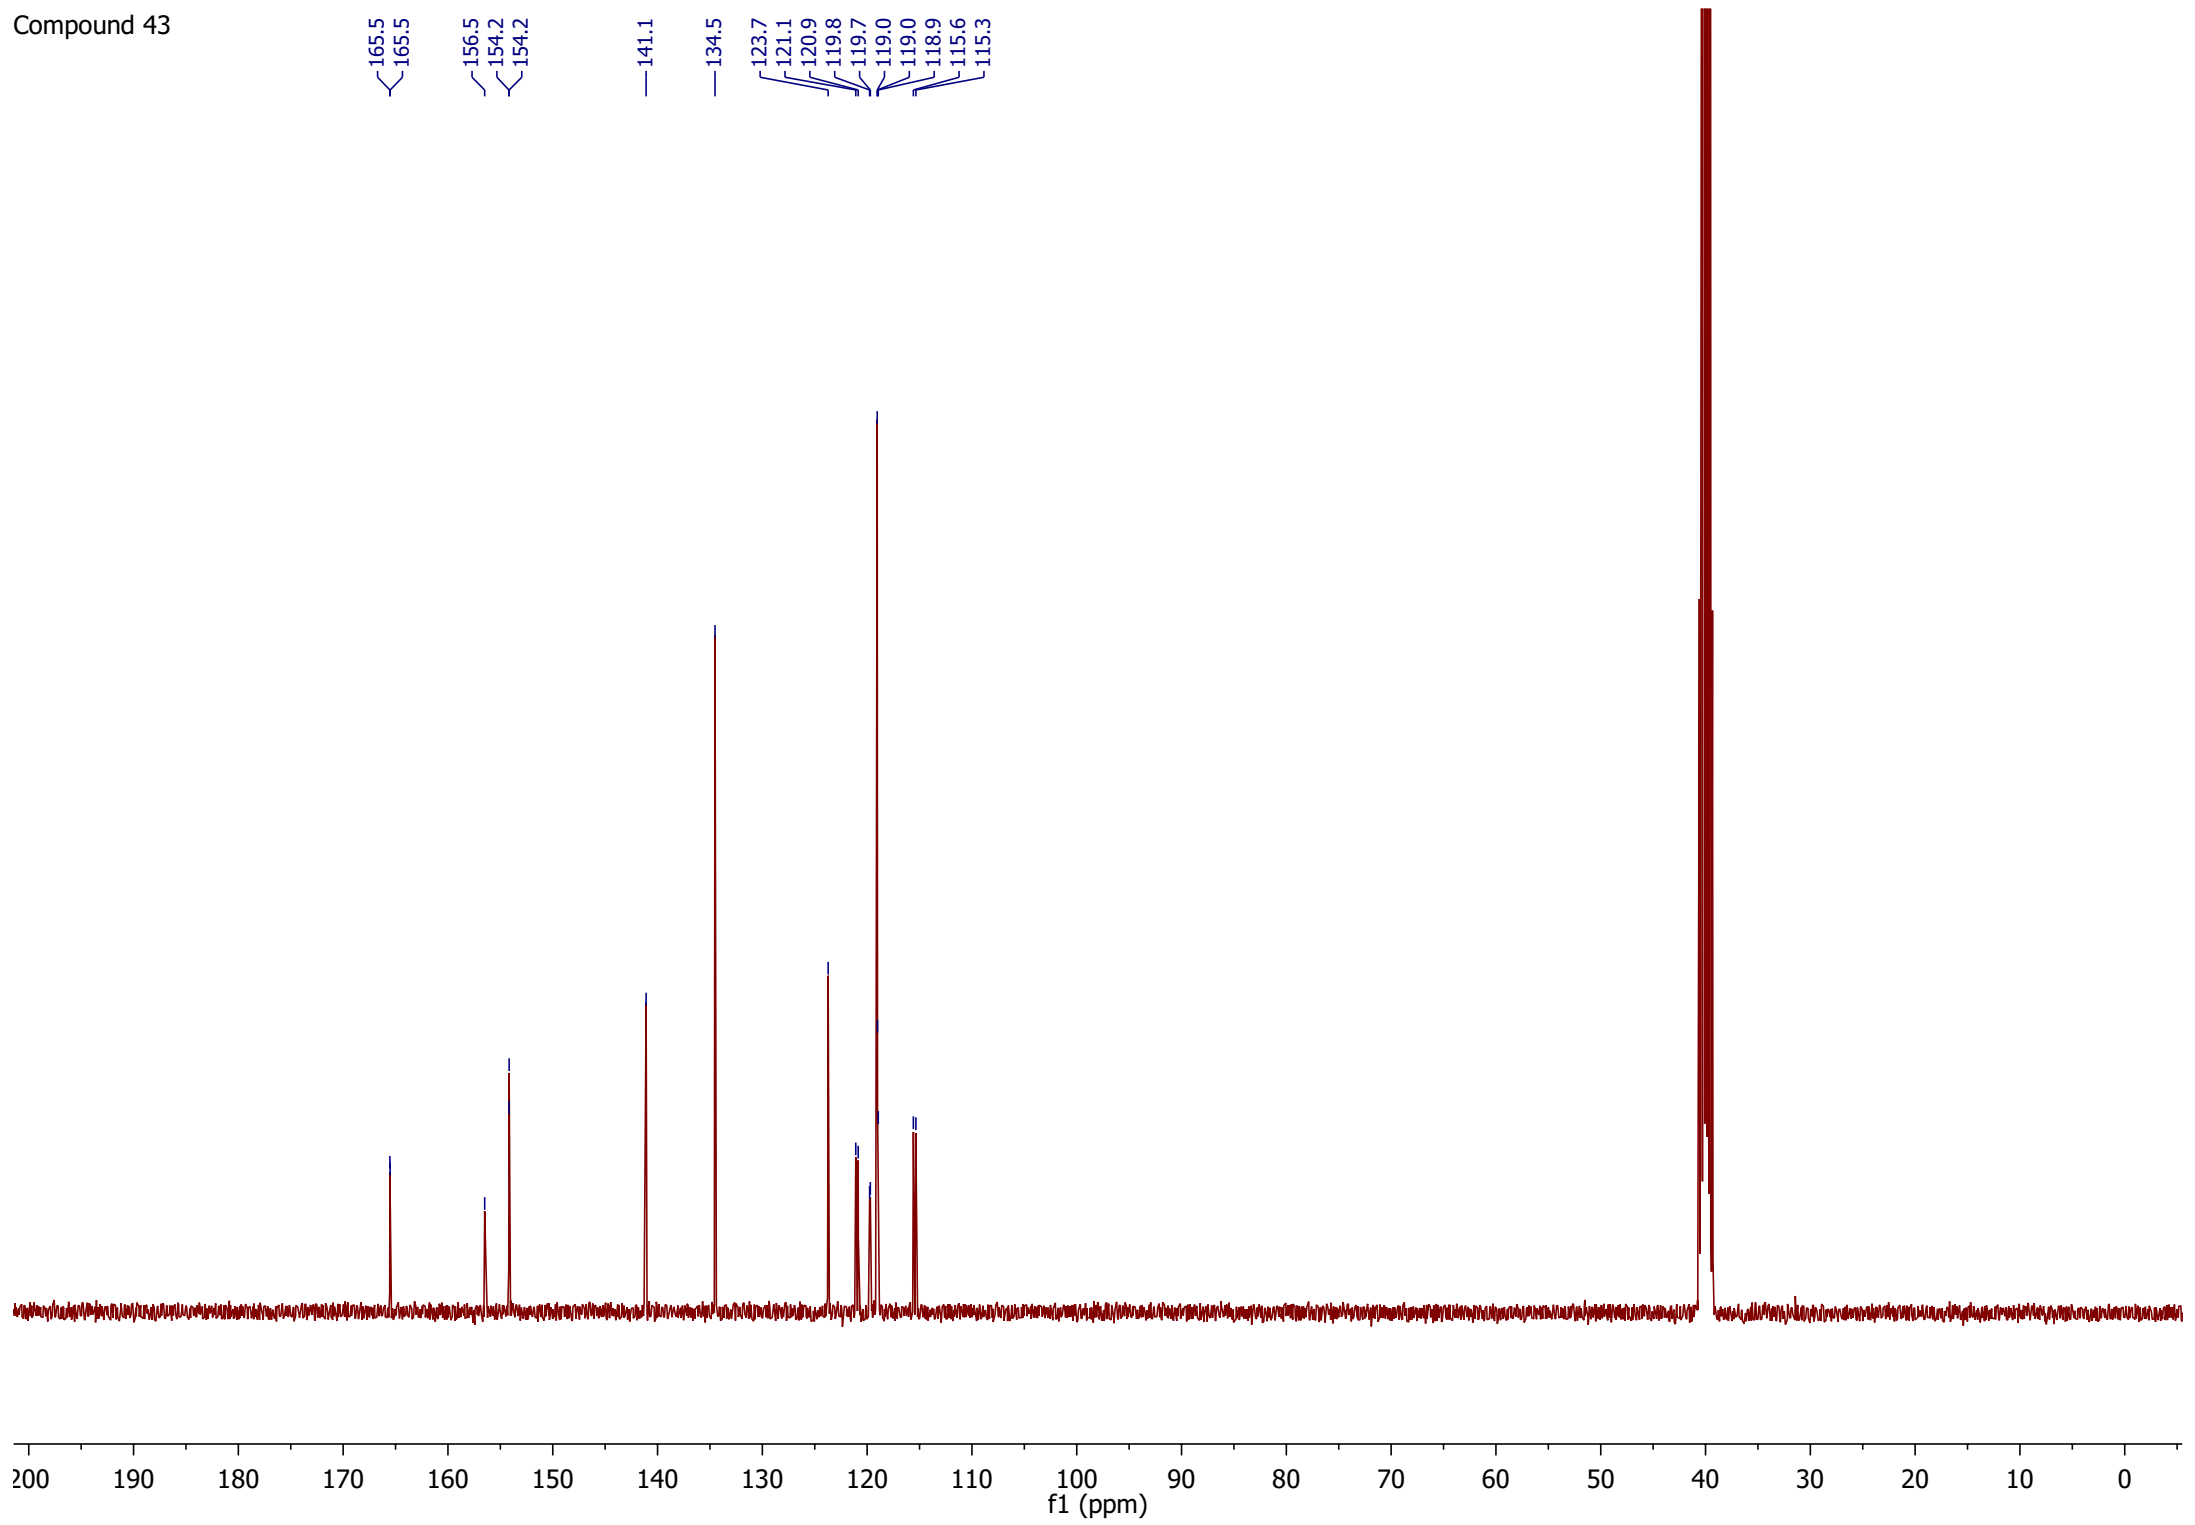





Compound 44

165.3  
165.3  
156.5  
154.9  
154.1  
138.3  
138.3  
126.3  
121.0  
120.8  
119.1  
119.0  
119.0  
118.9  
118.8  
115.3  
115.0

21.5

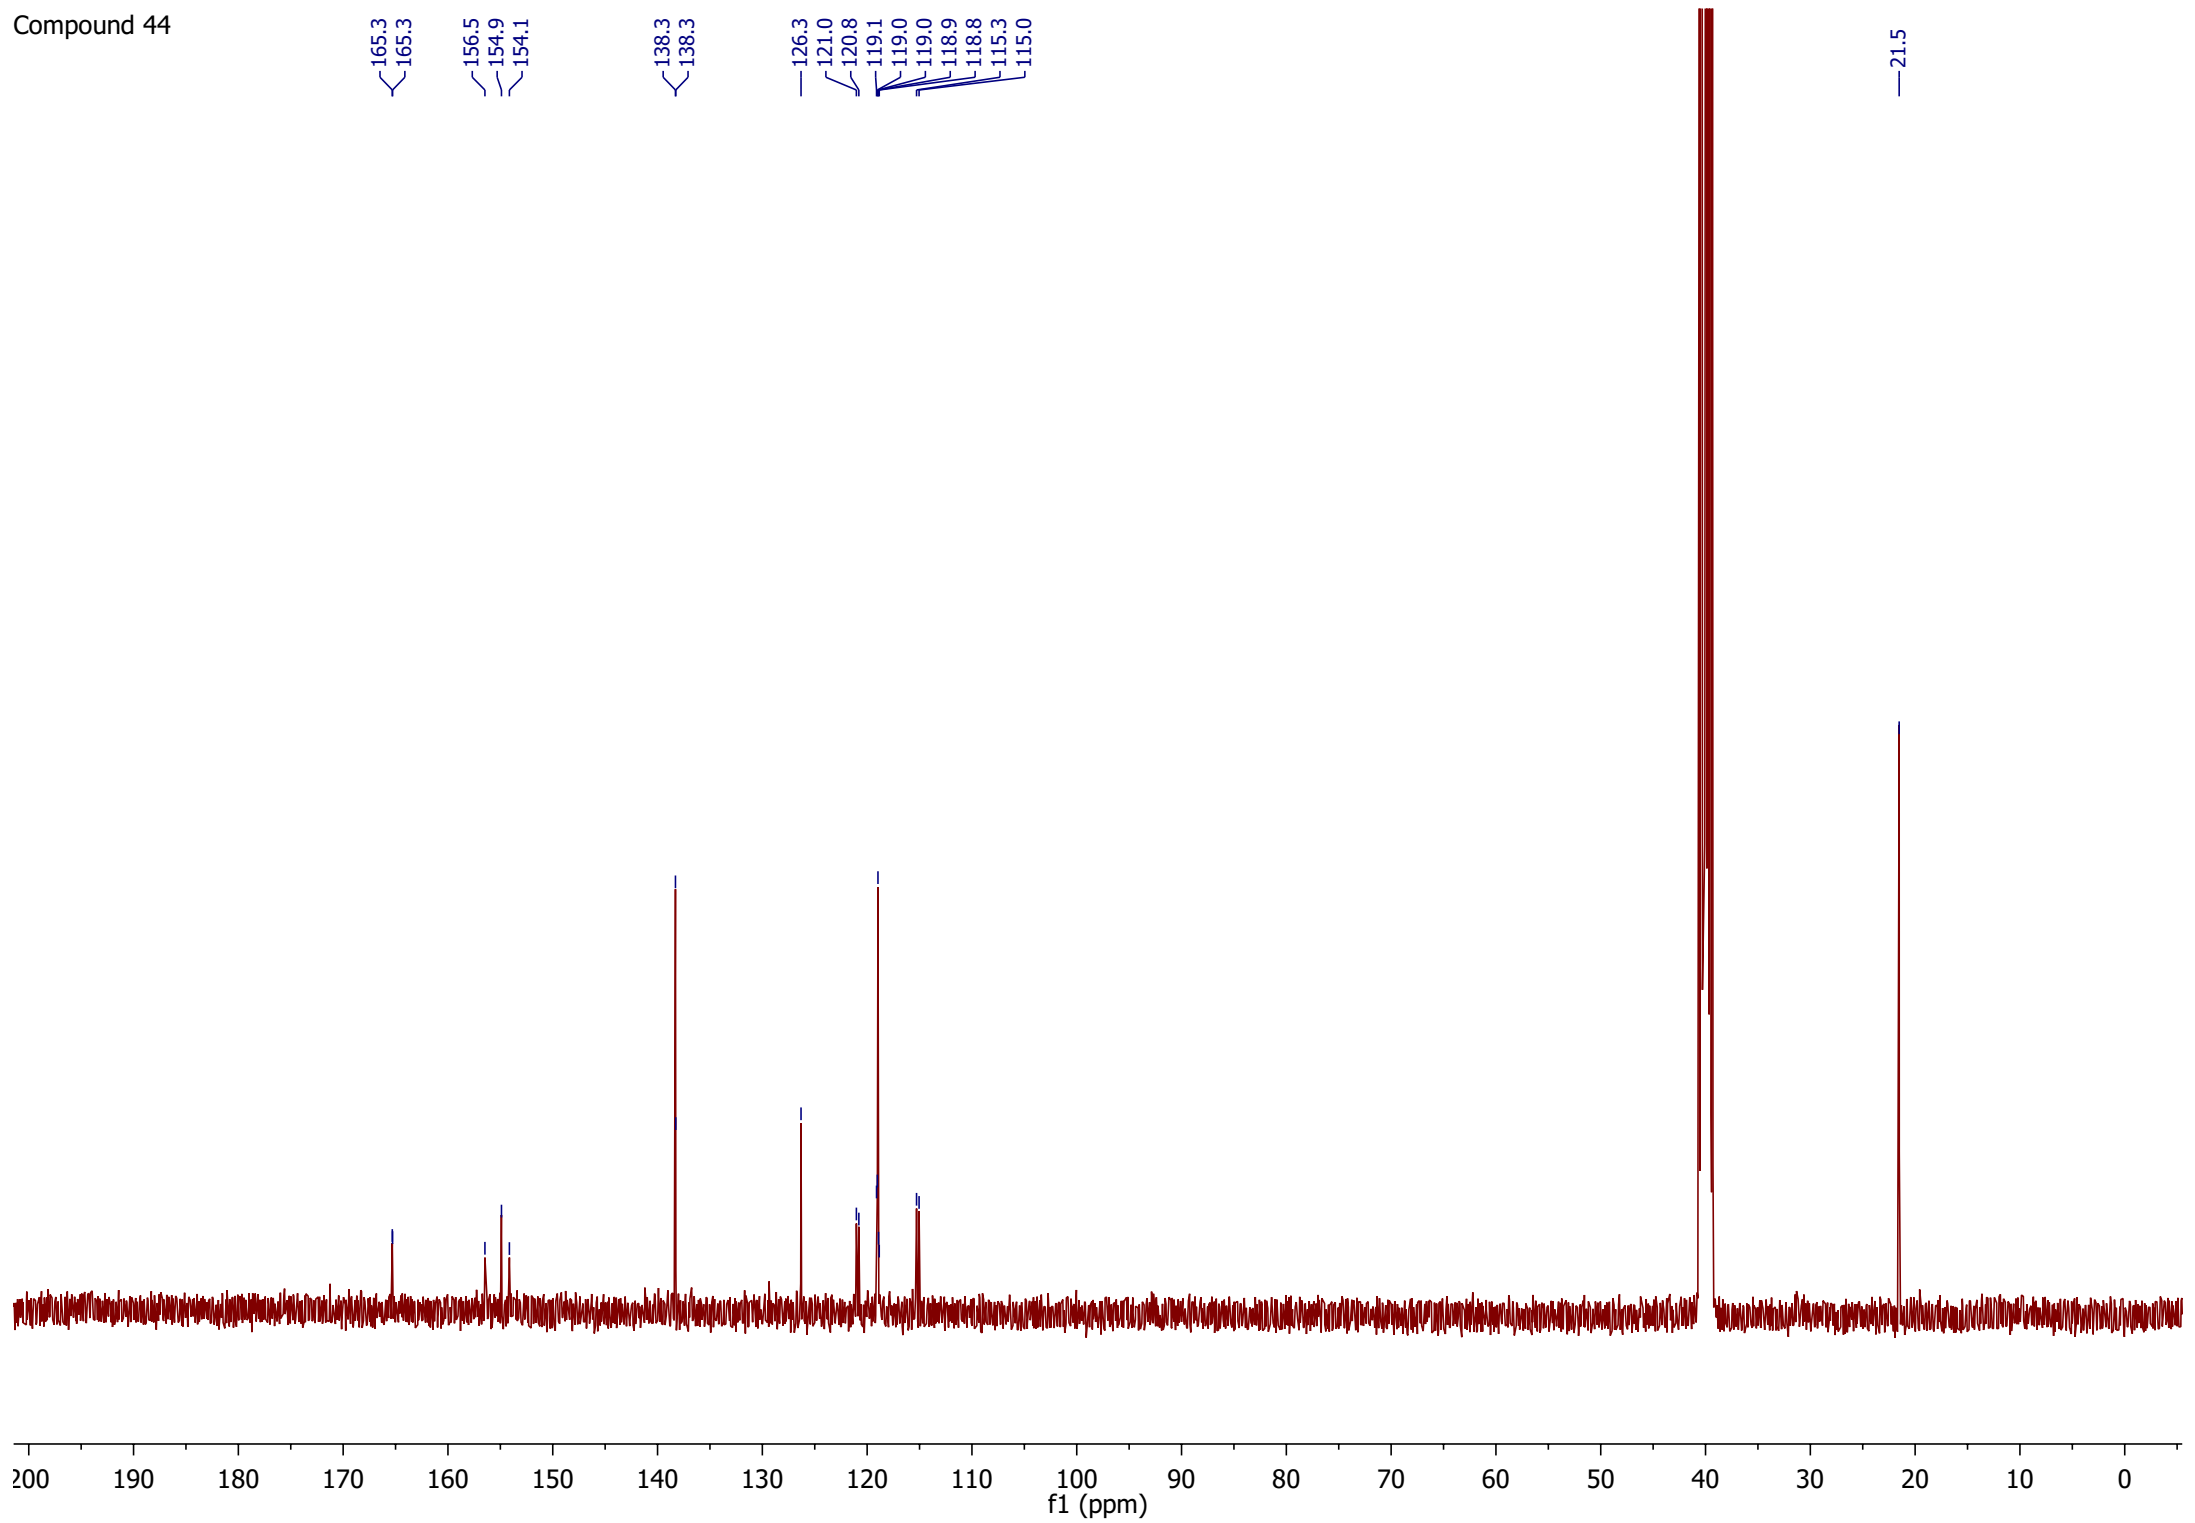

Compound 45

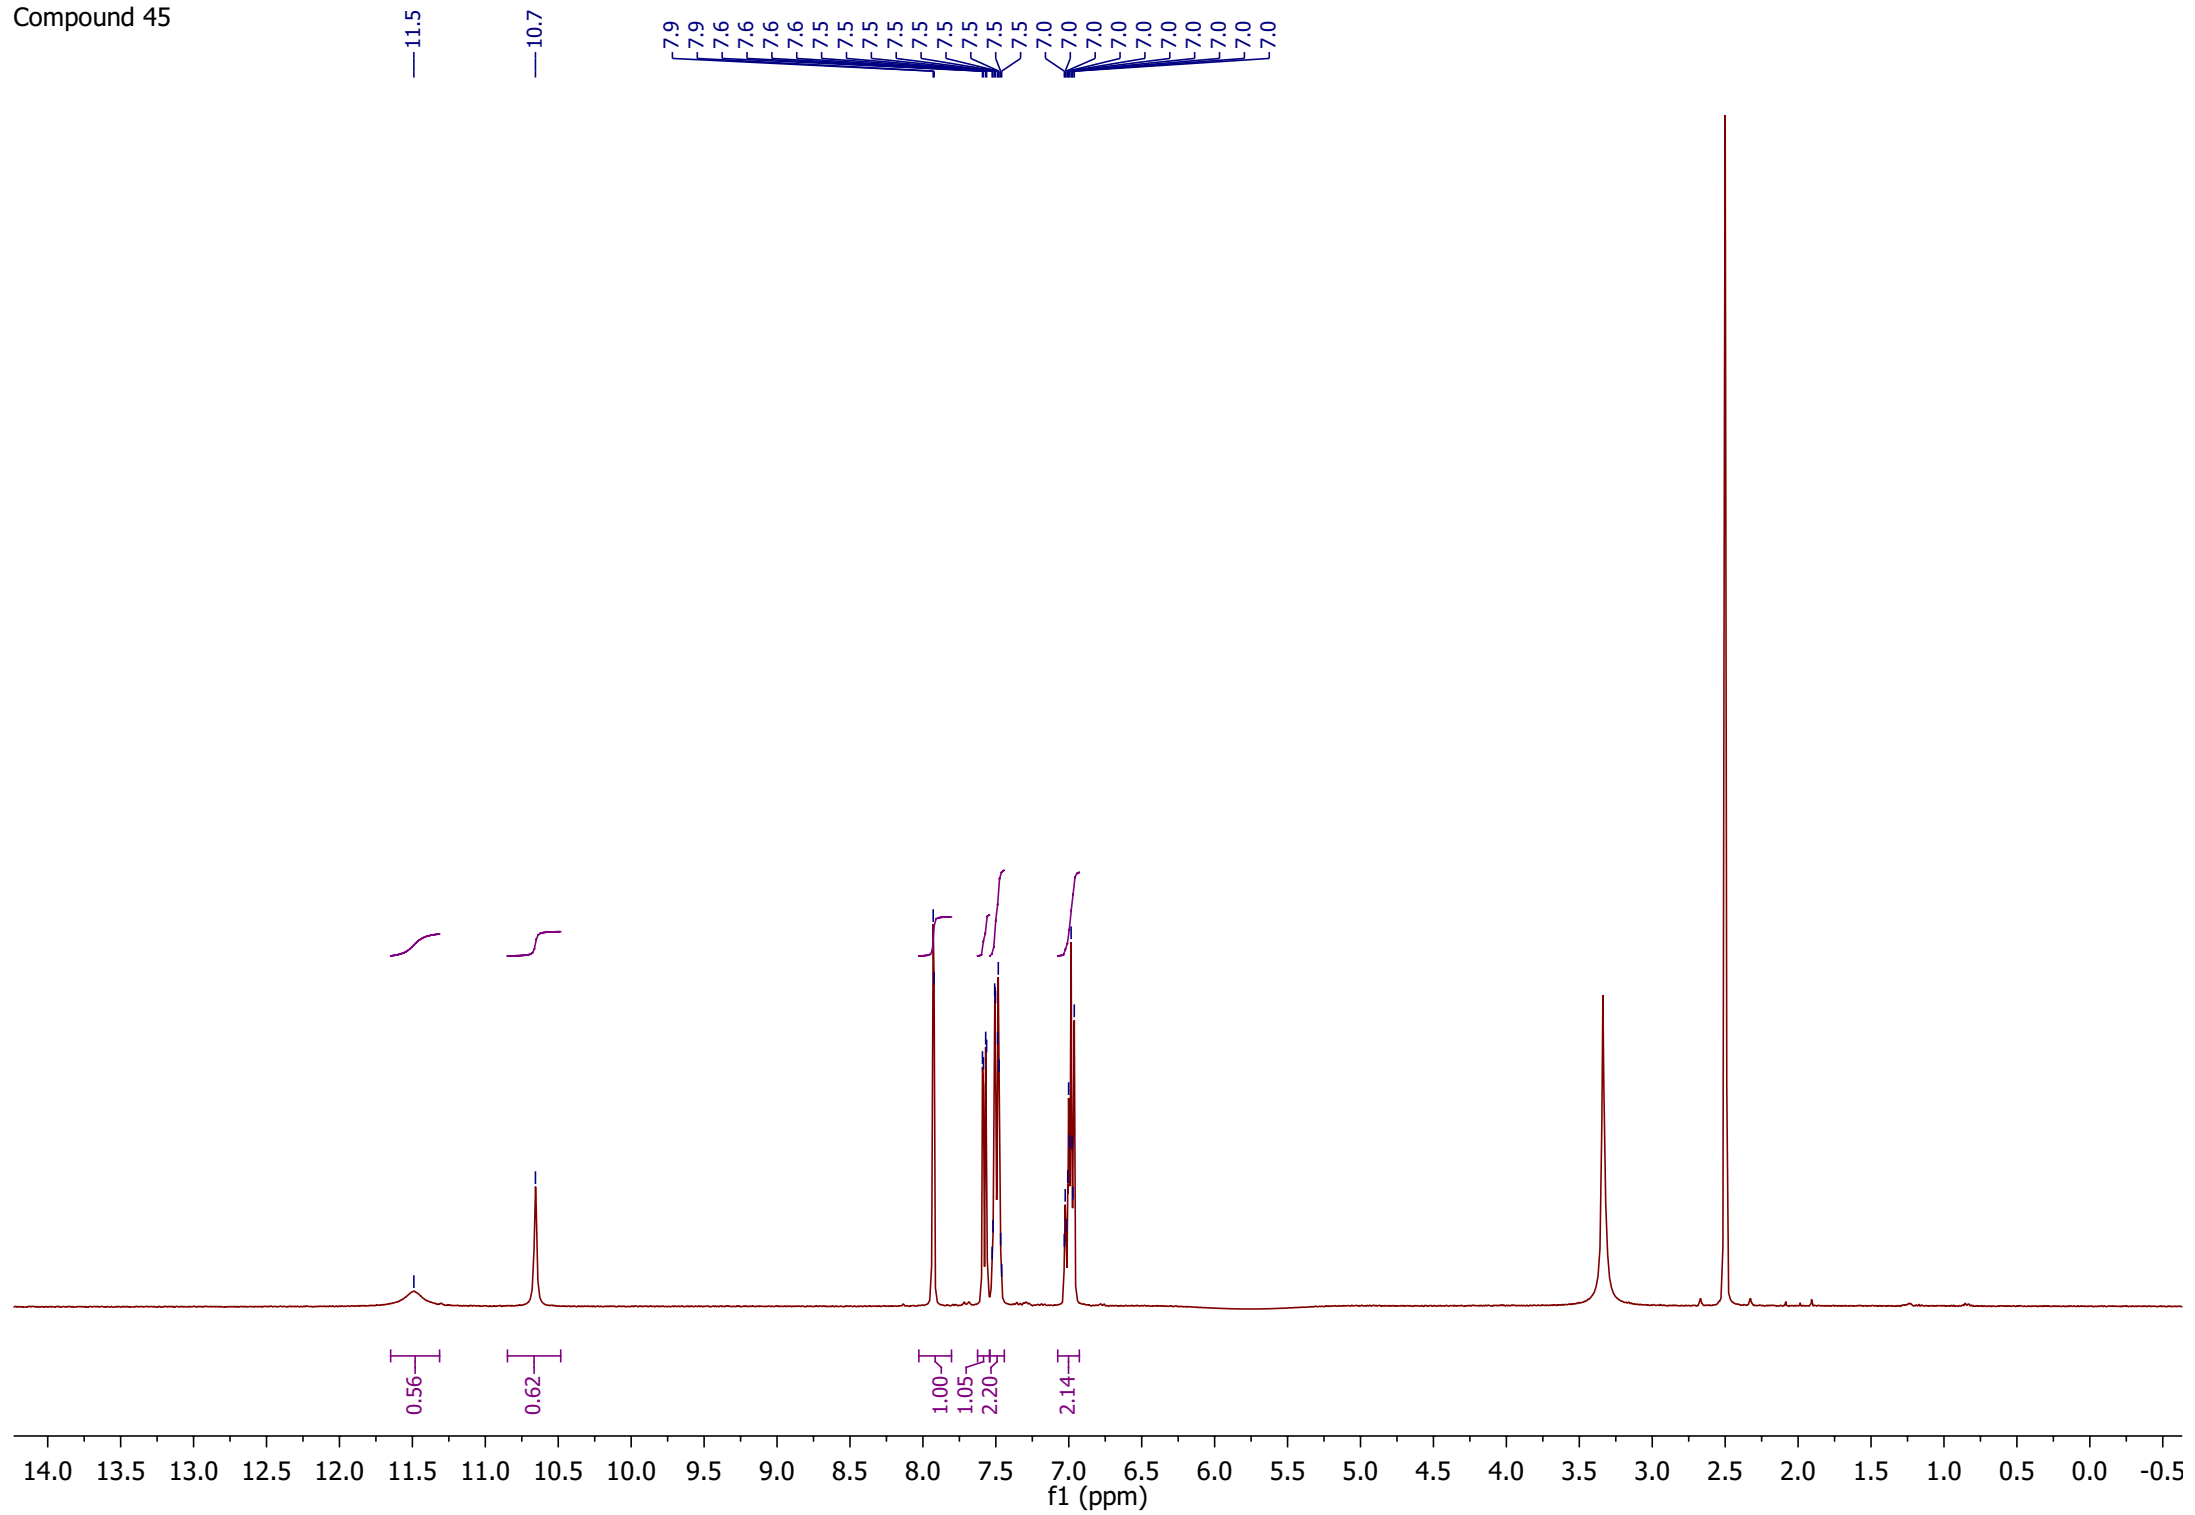

Compound 45

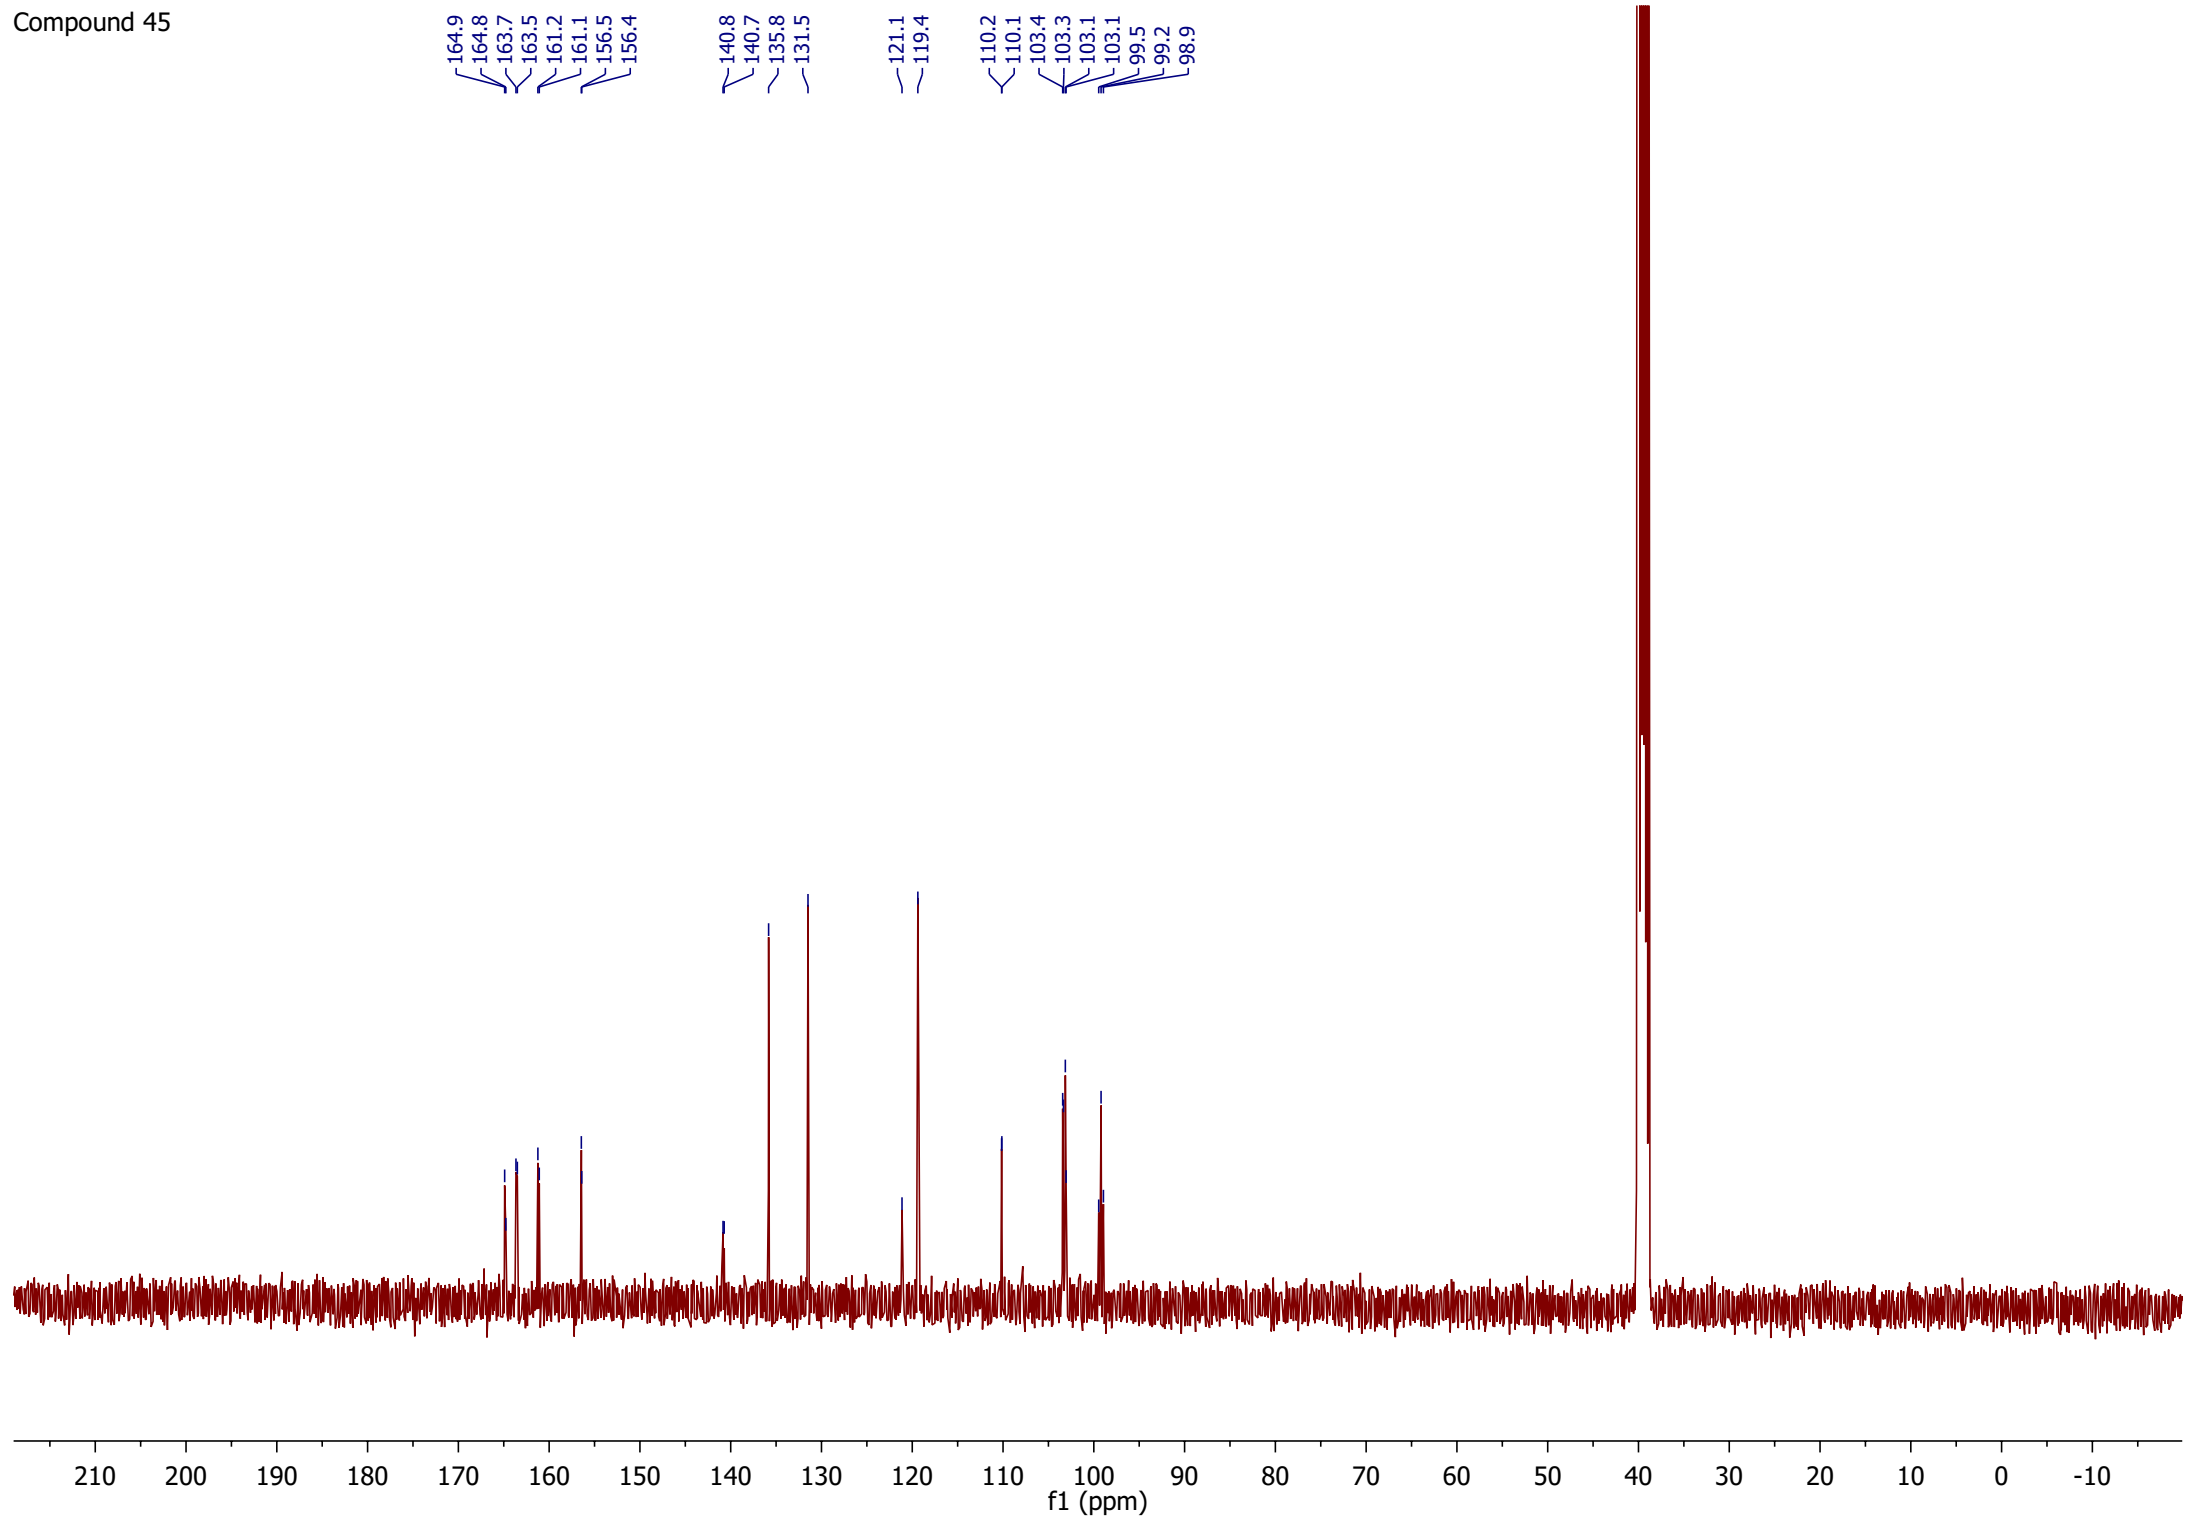

Compound 46

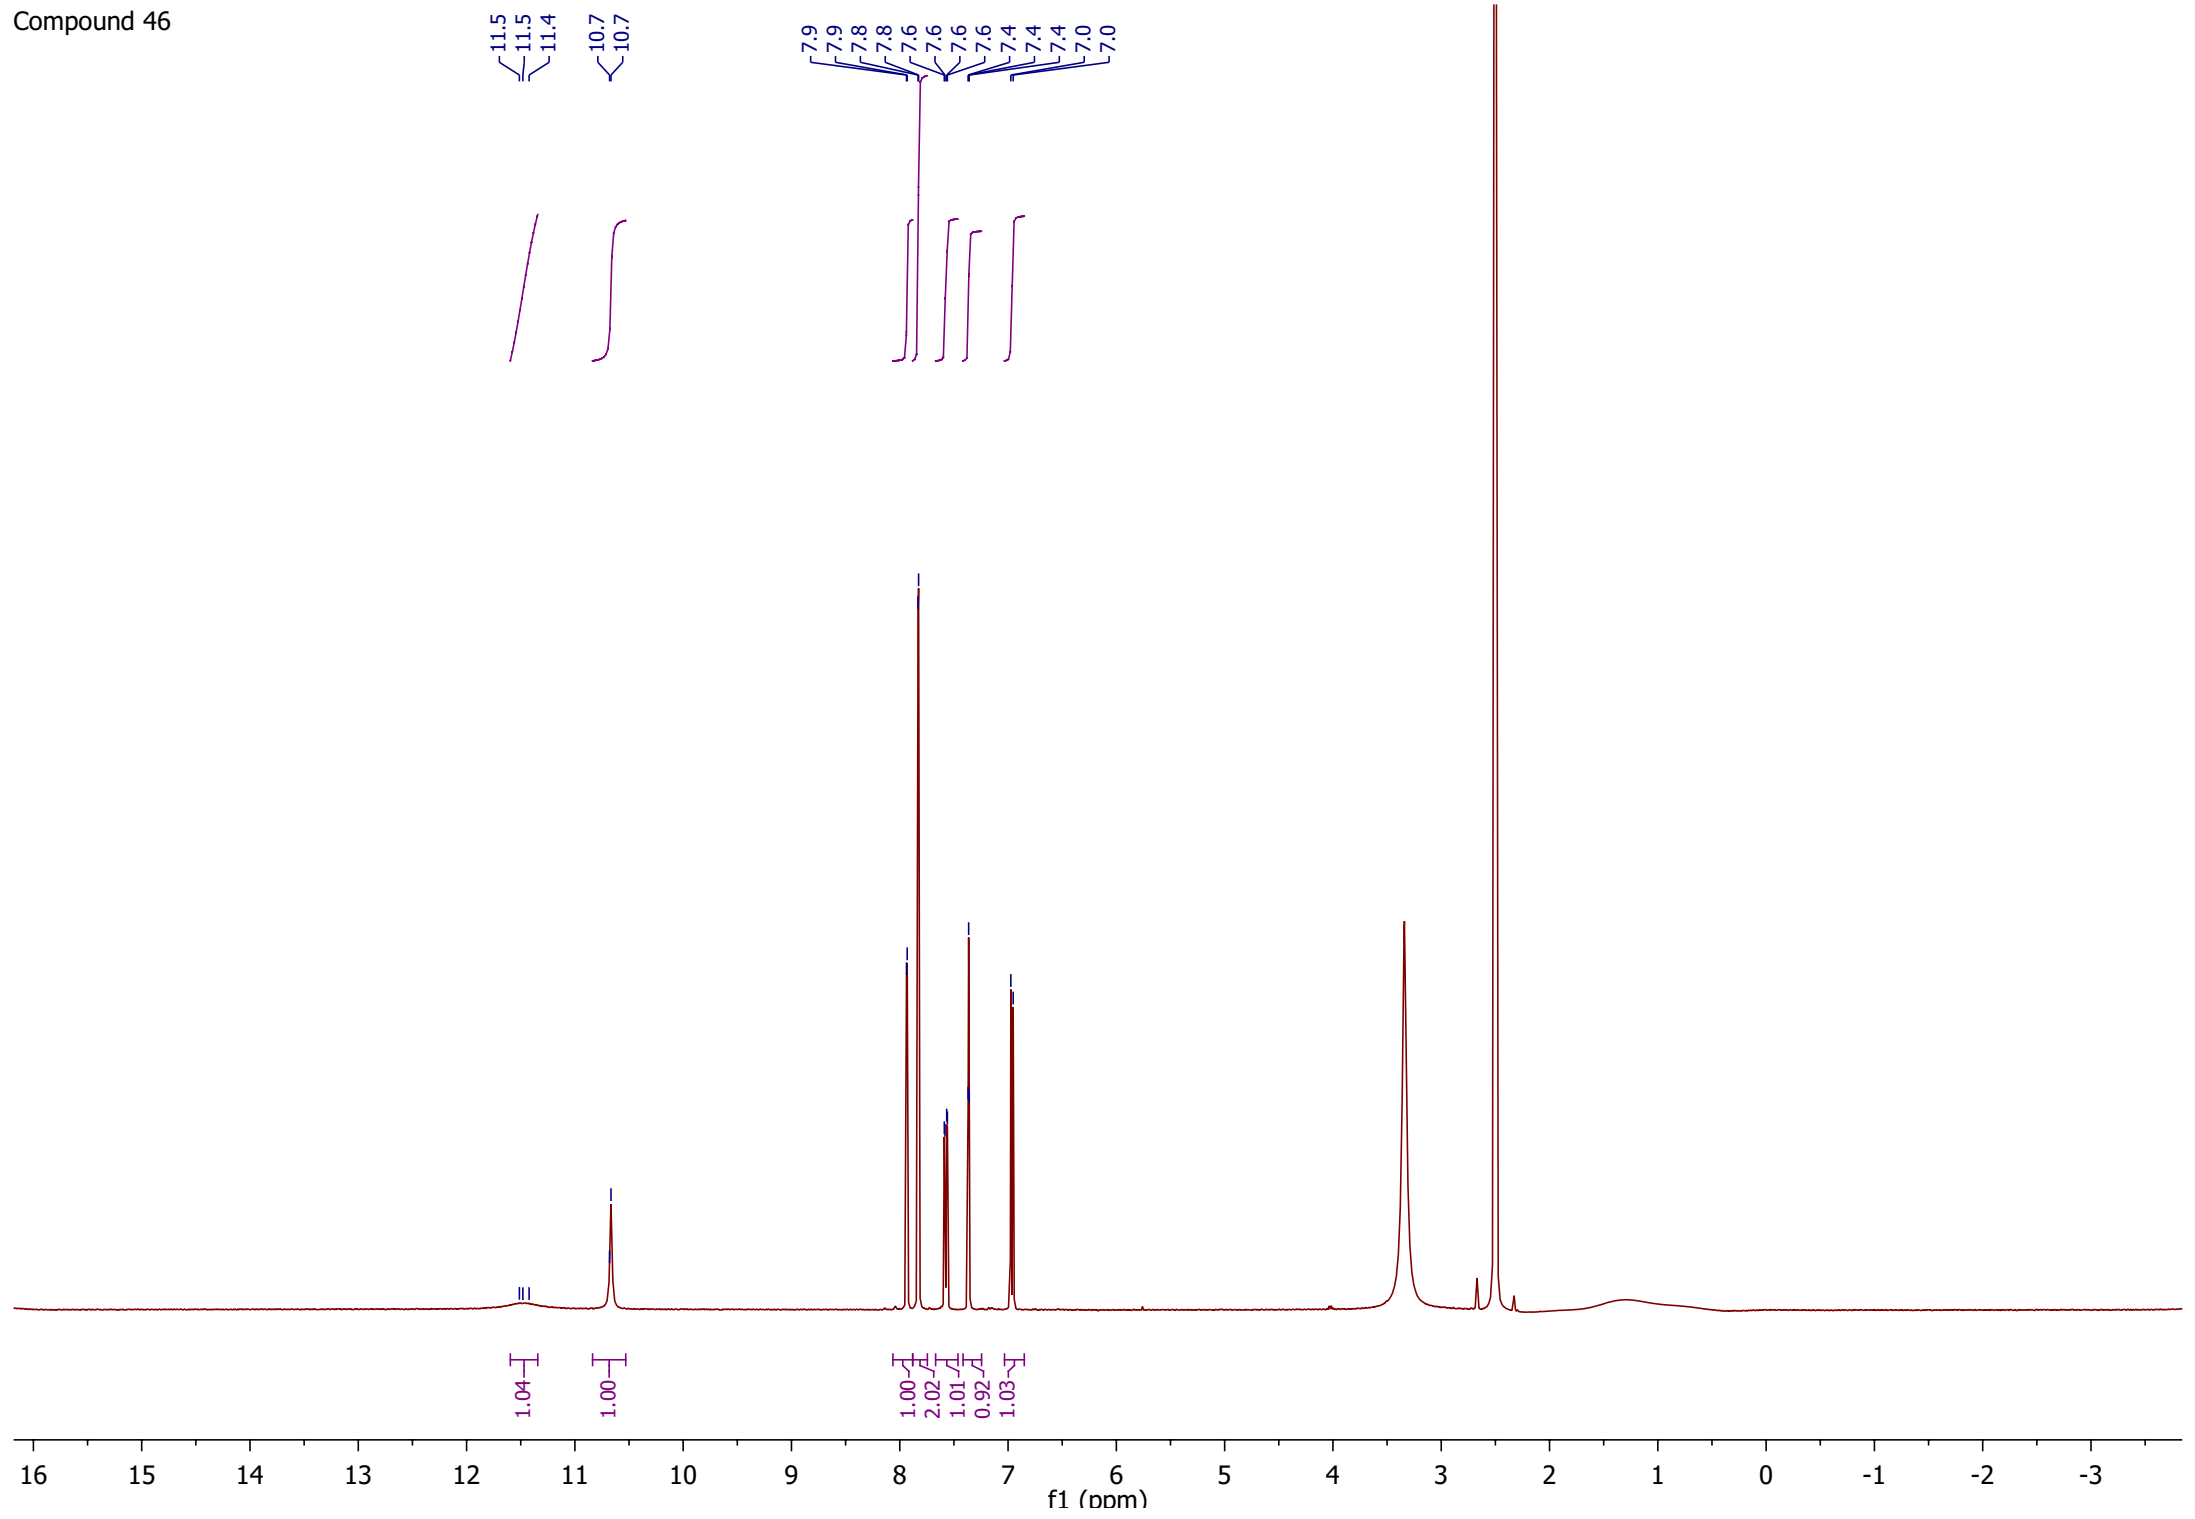

Compound 46

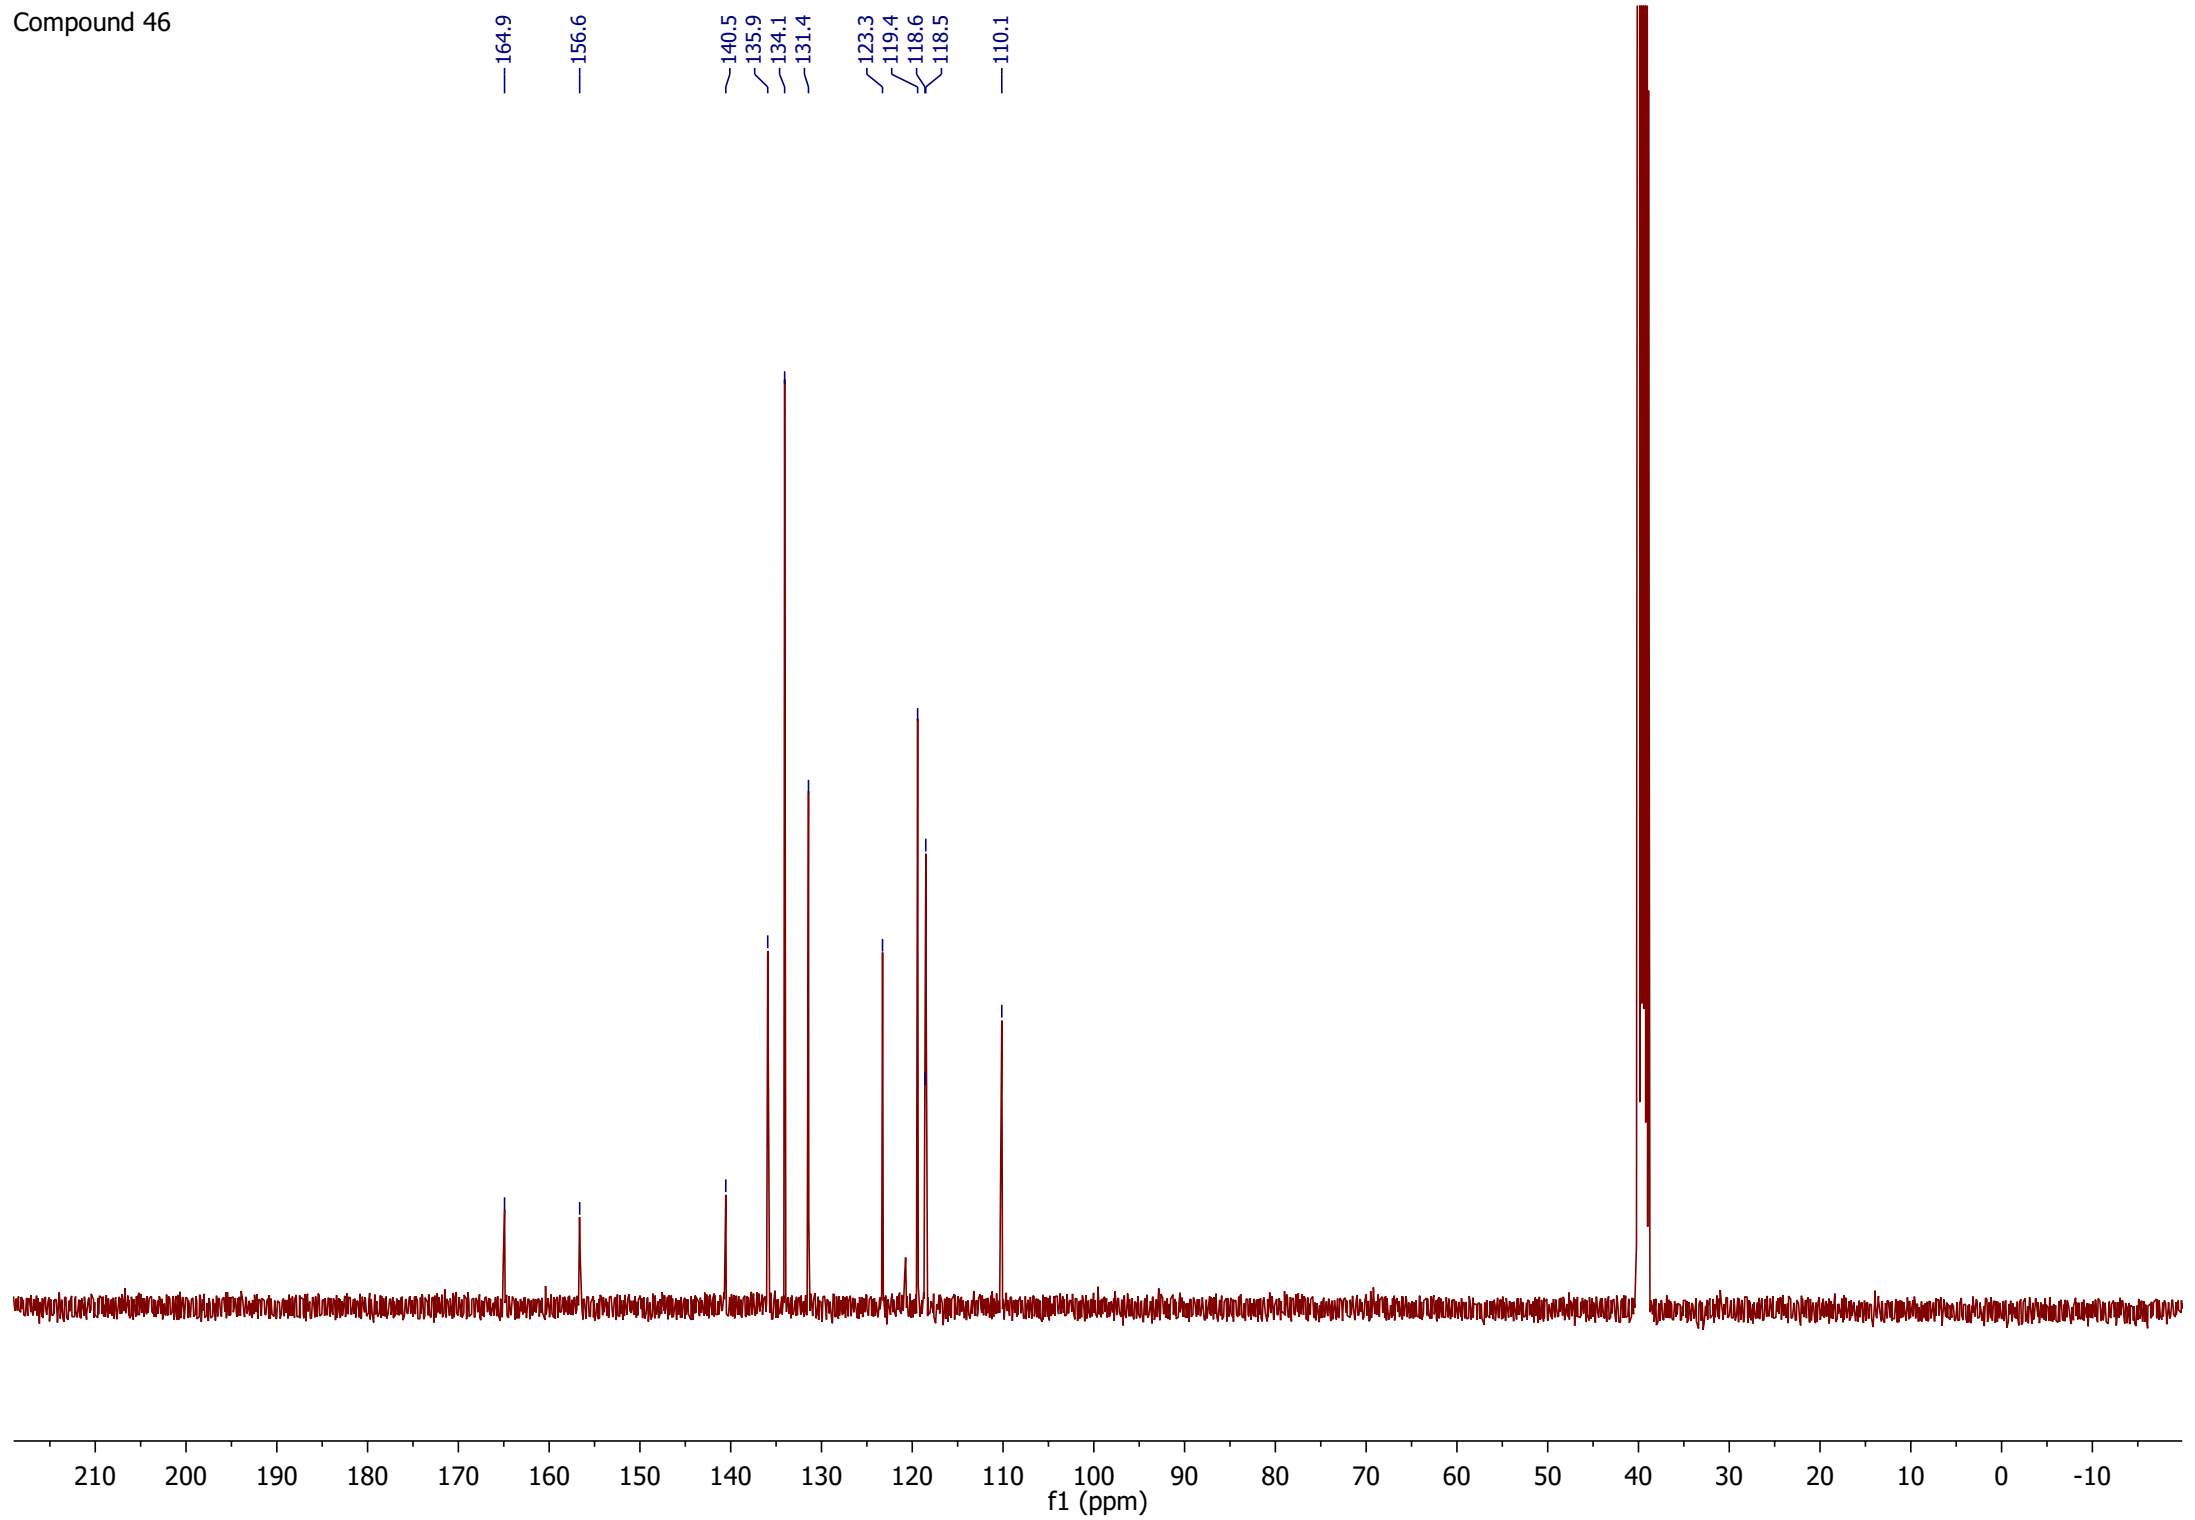

Compound 47

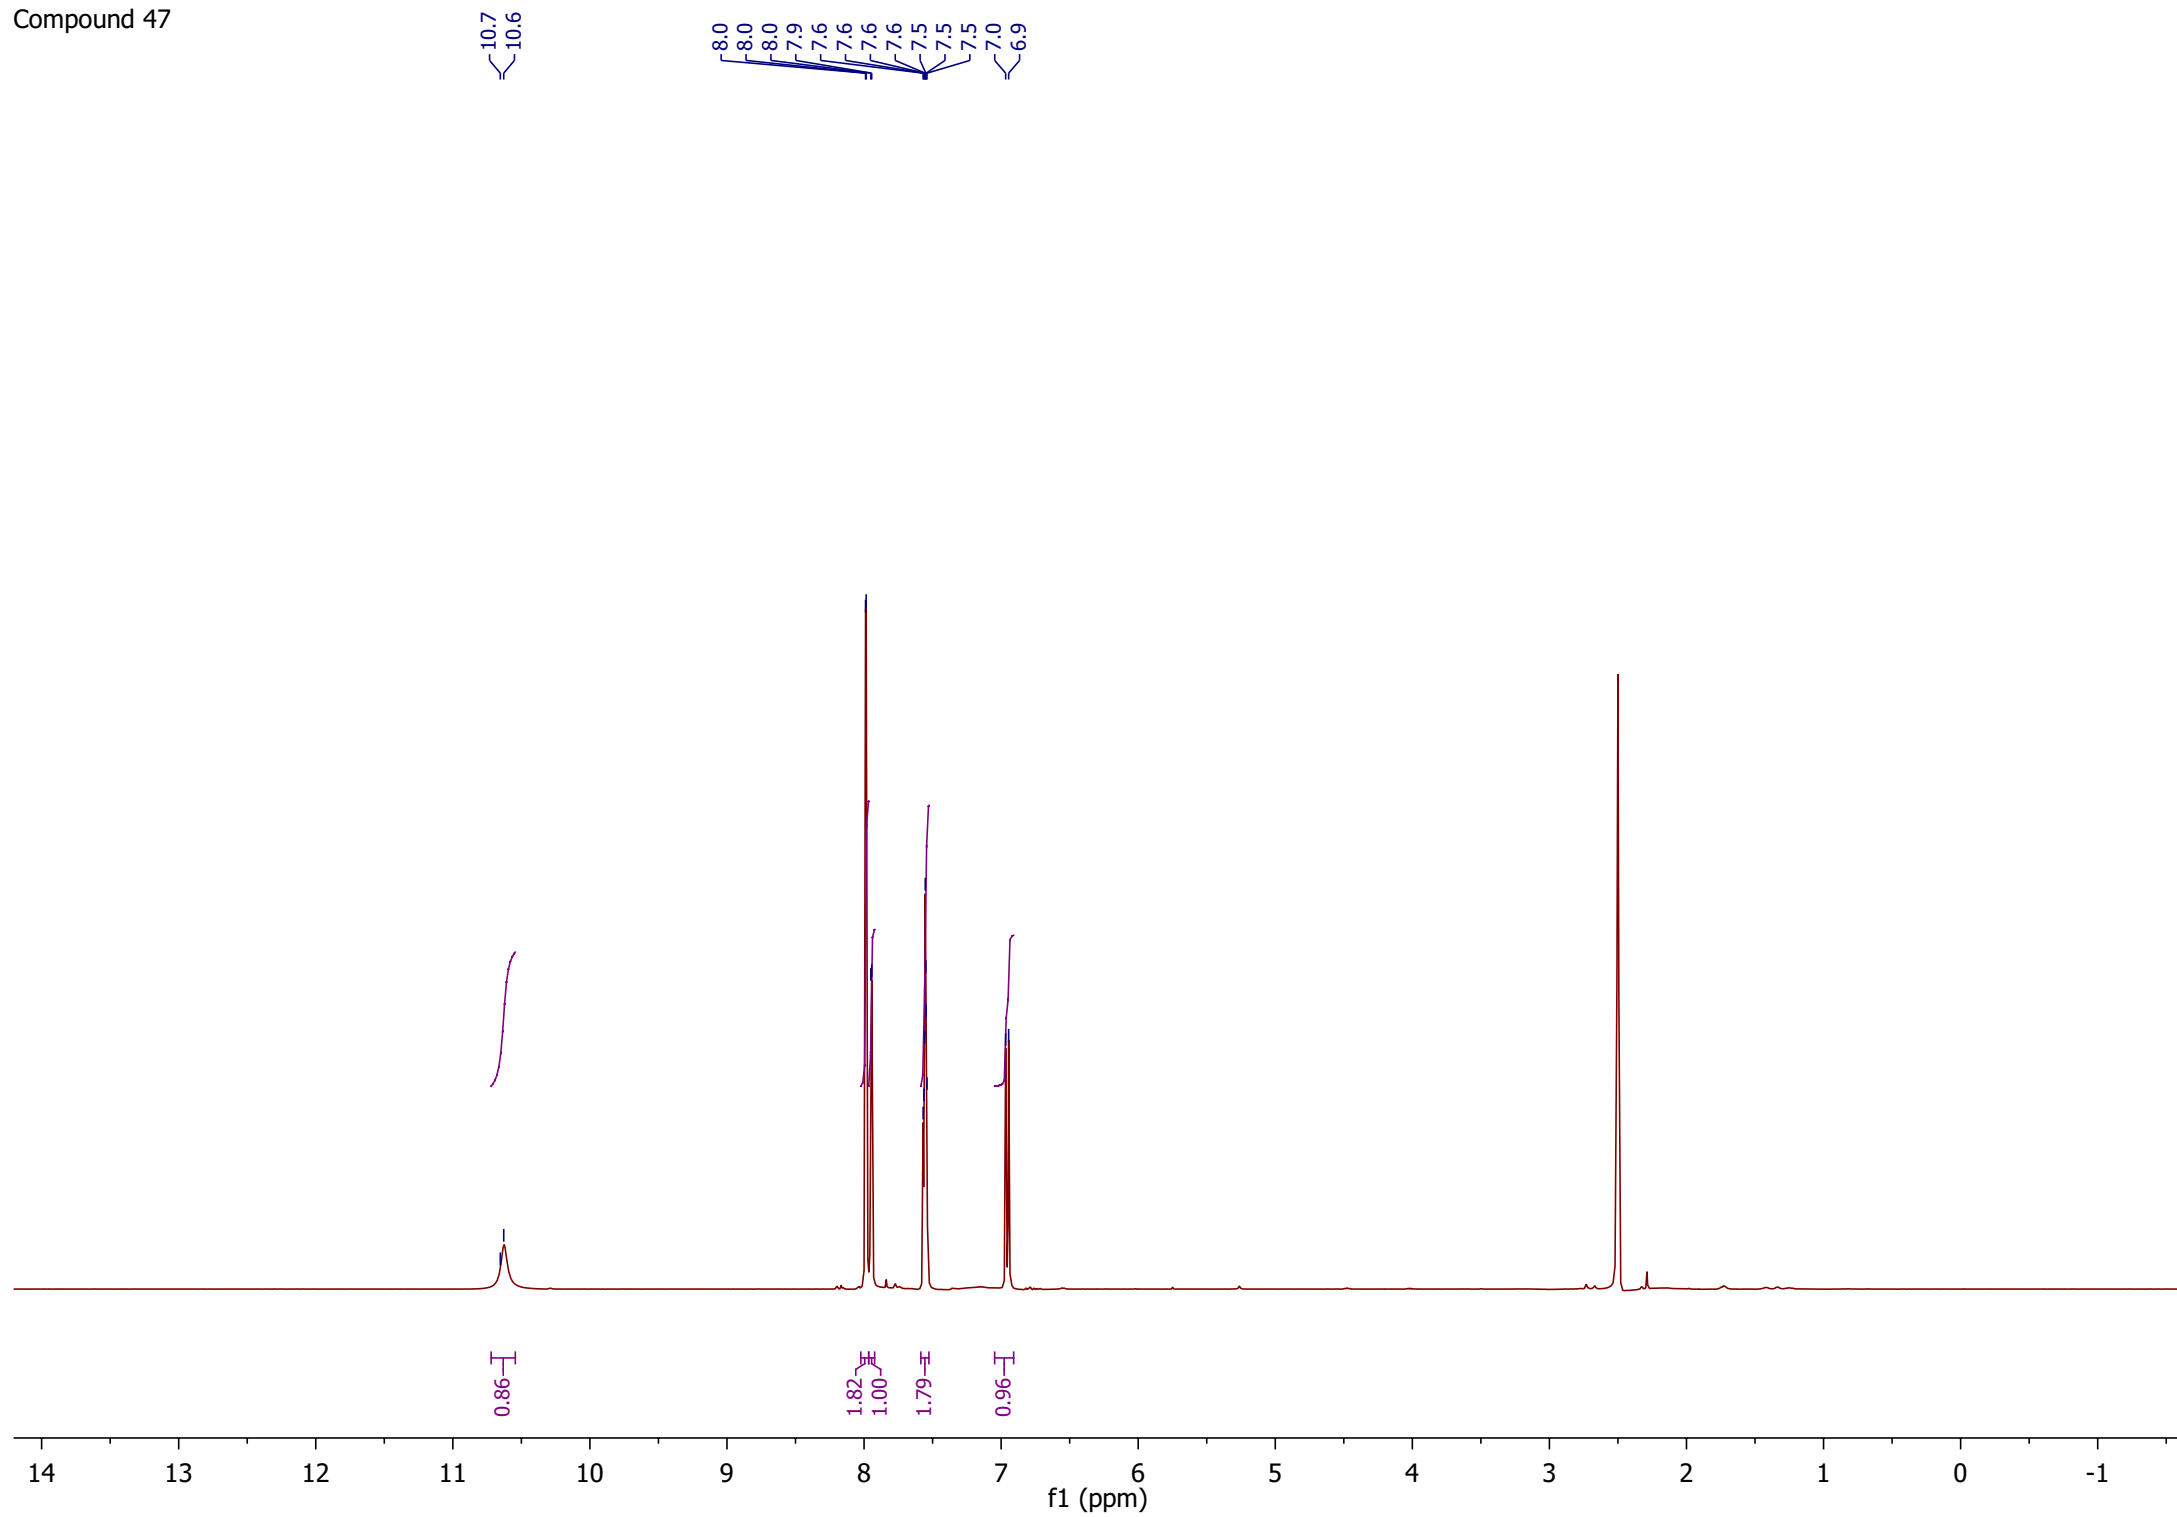

Compound 47

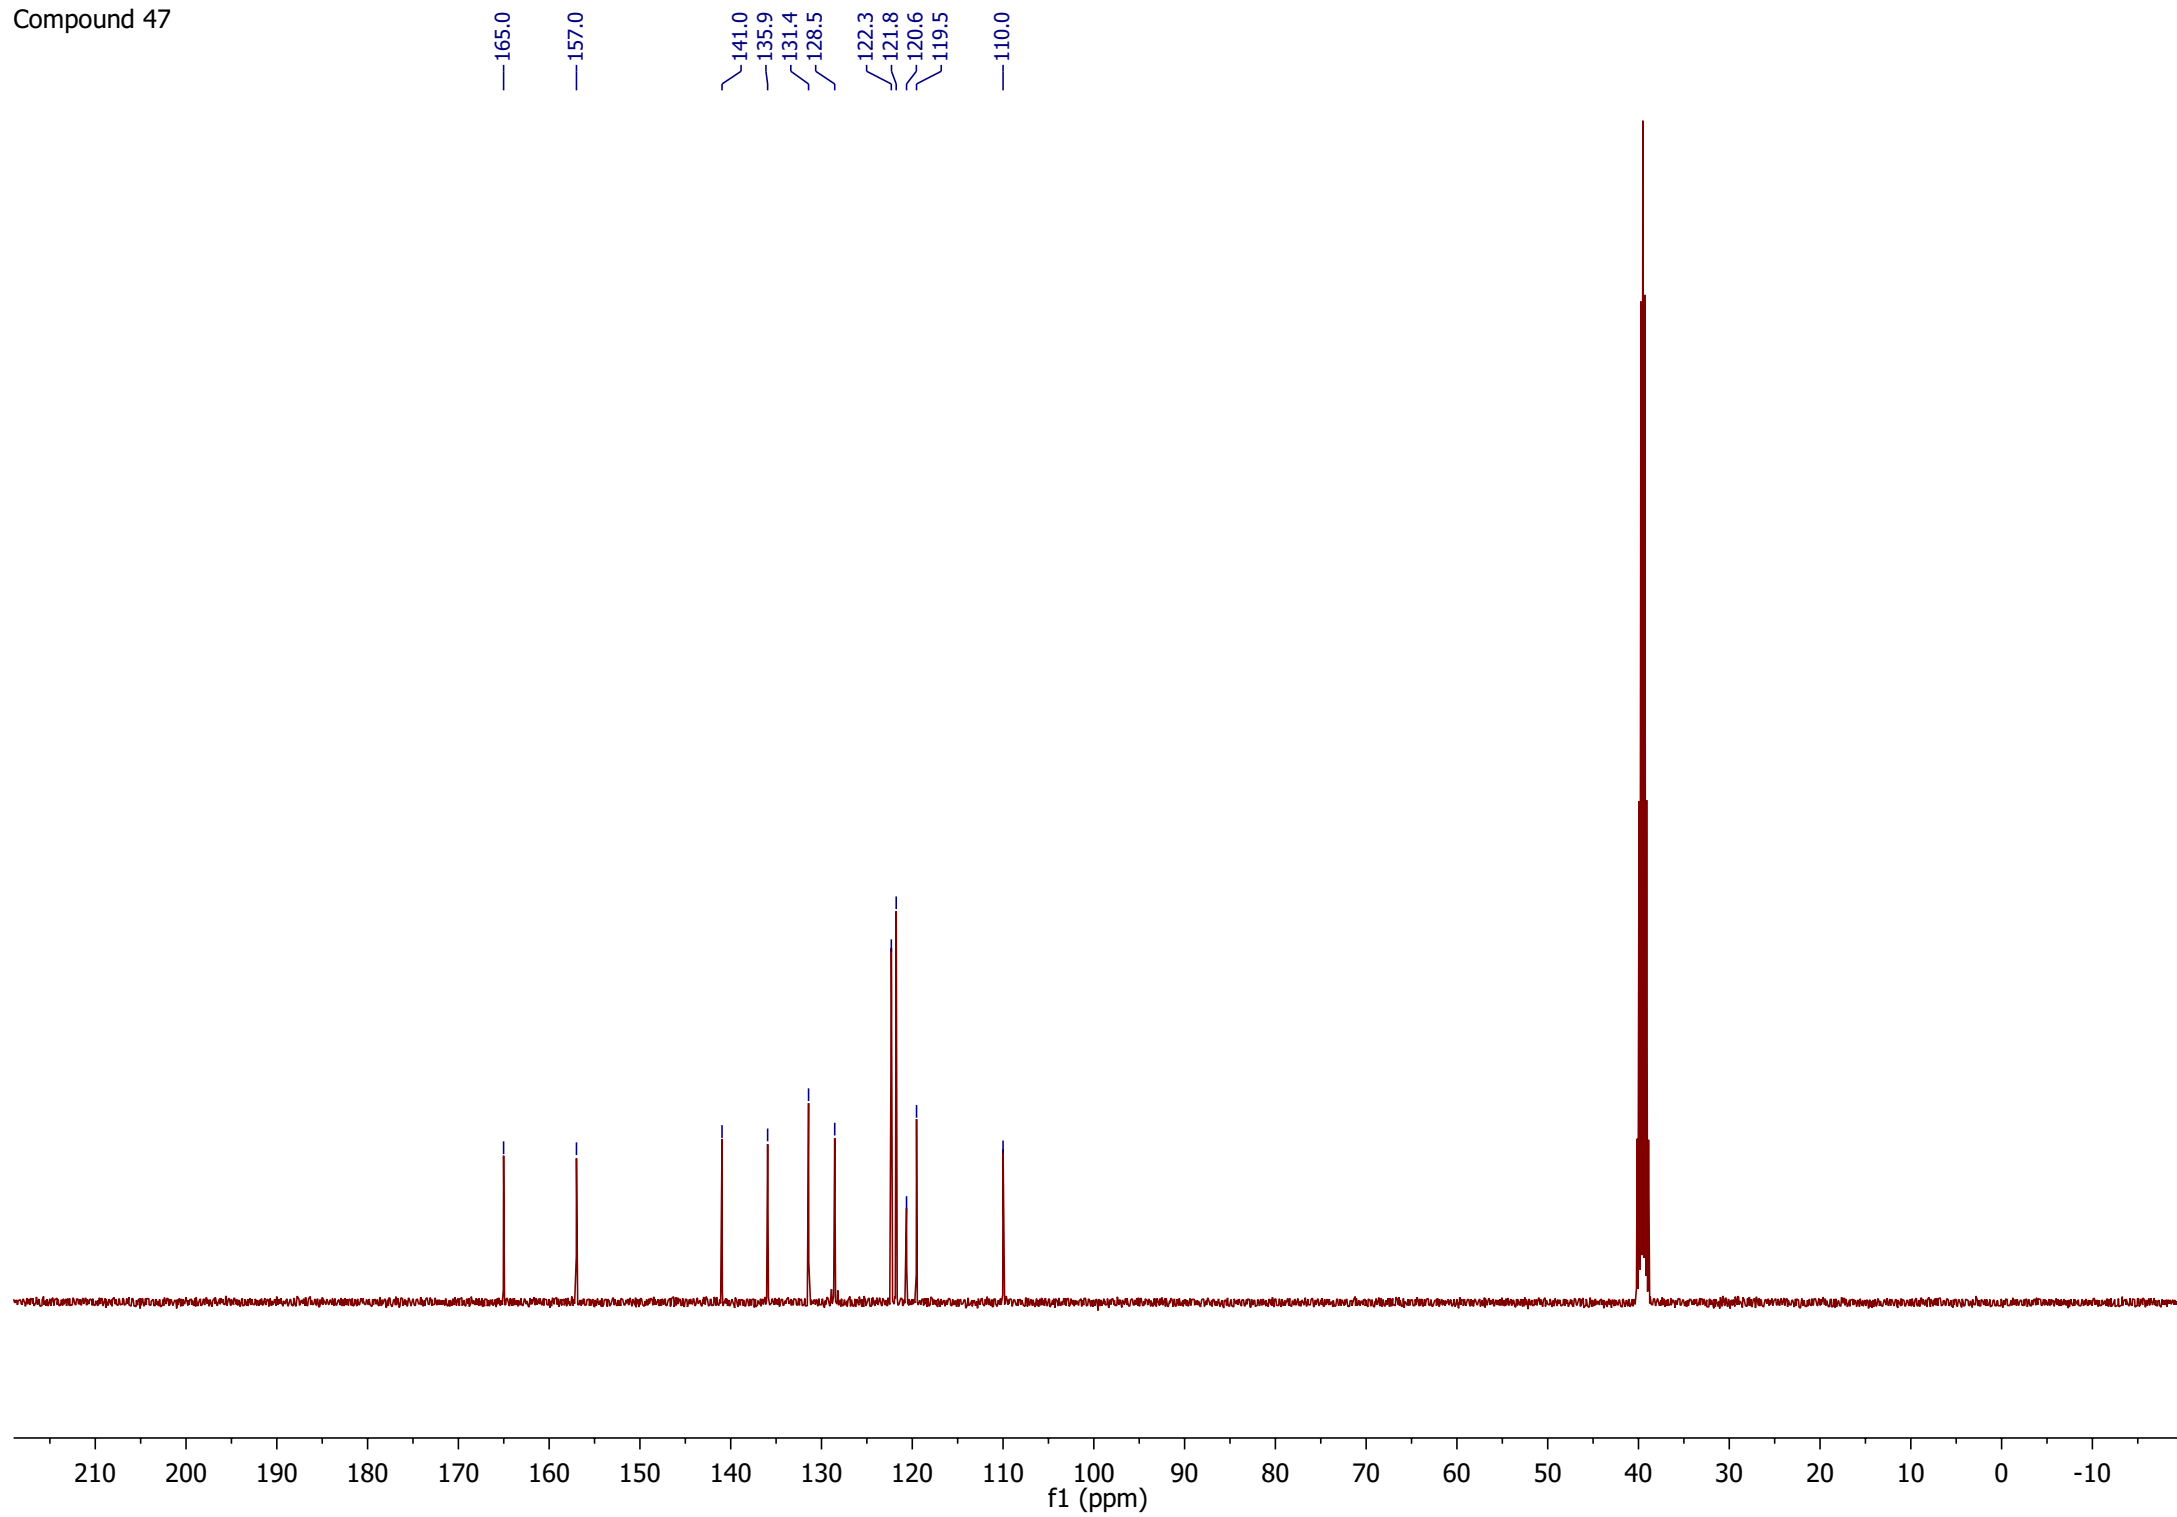

Compound 48

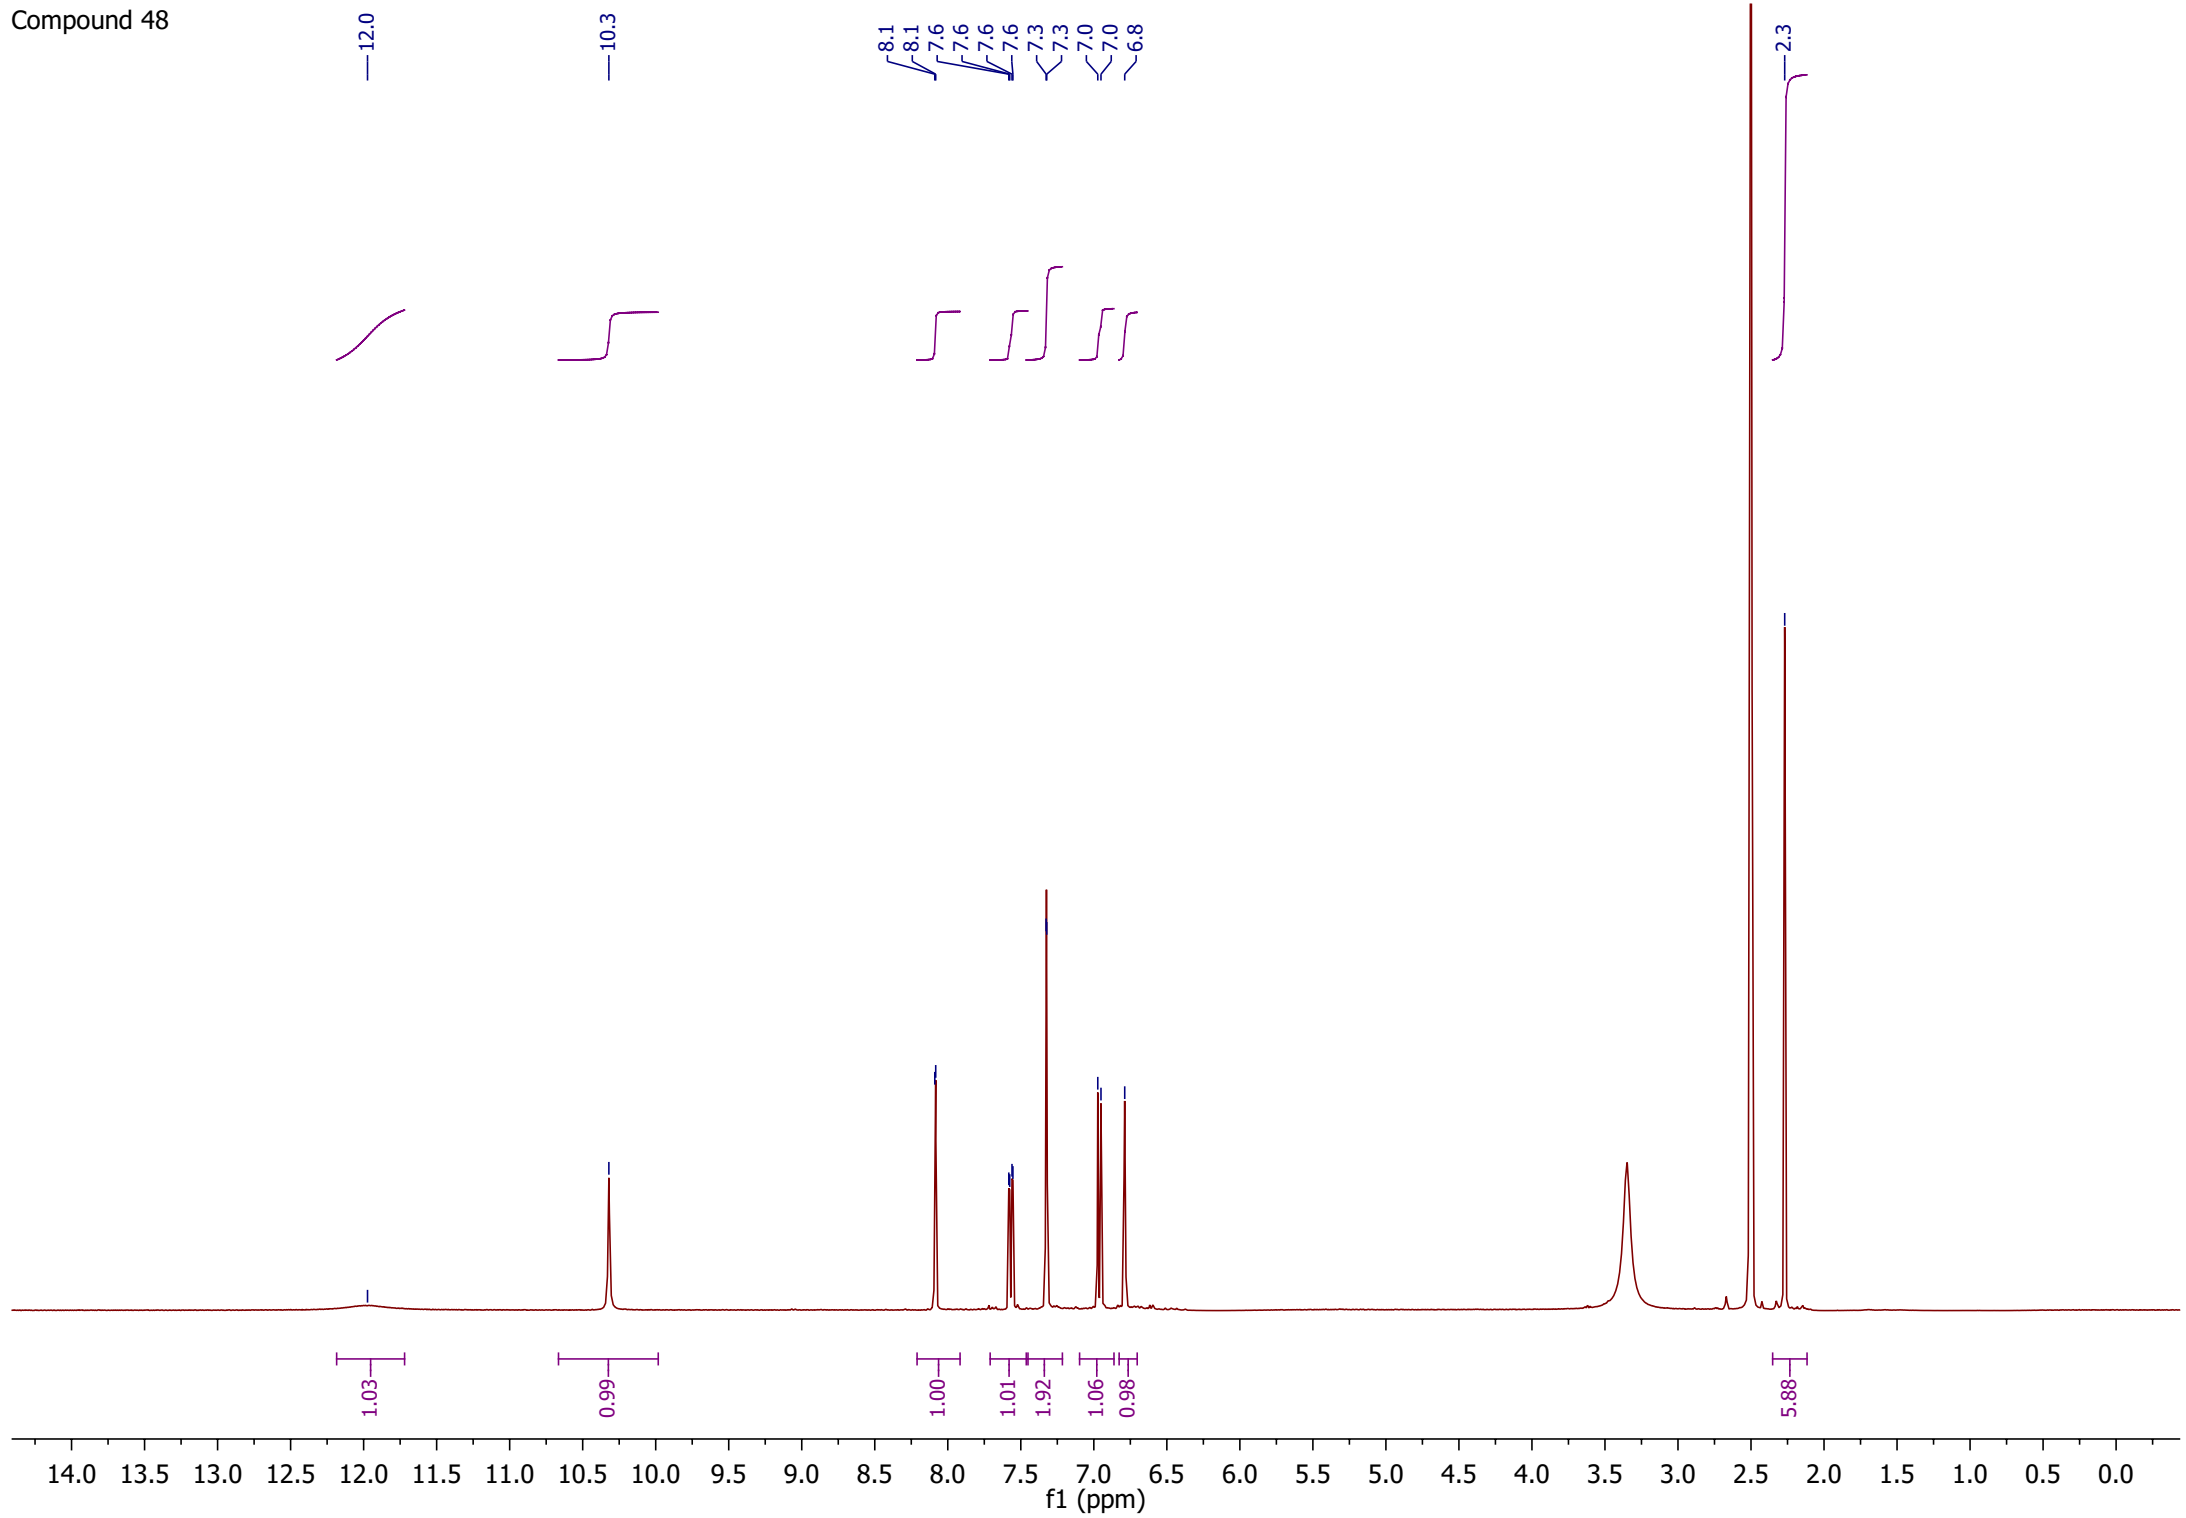



Compound 48

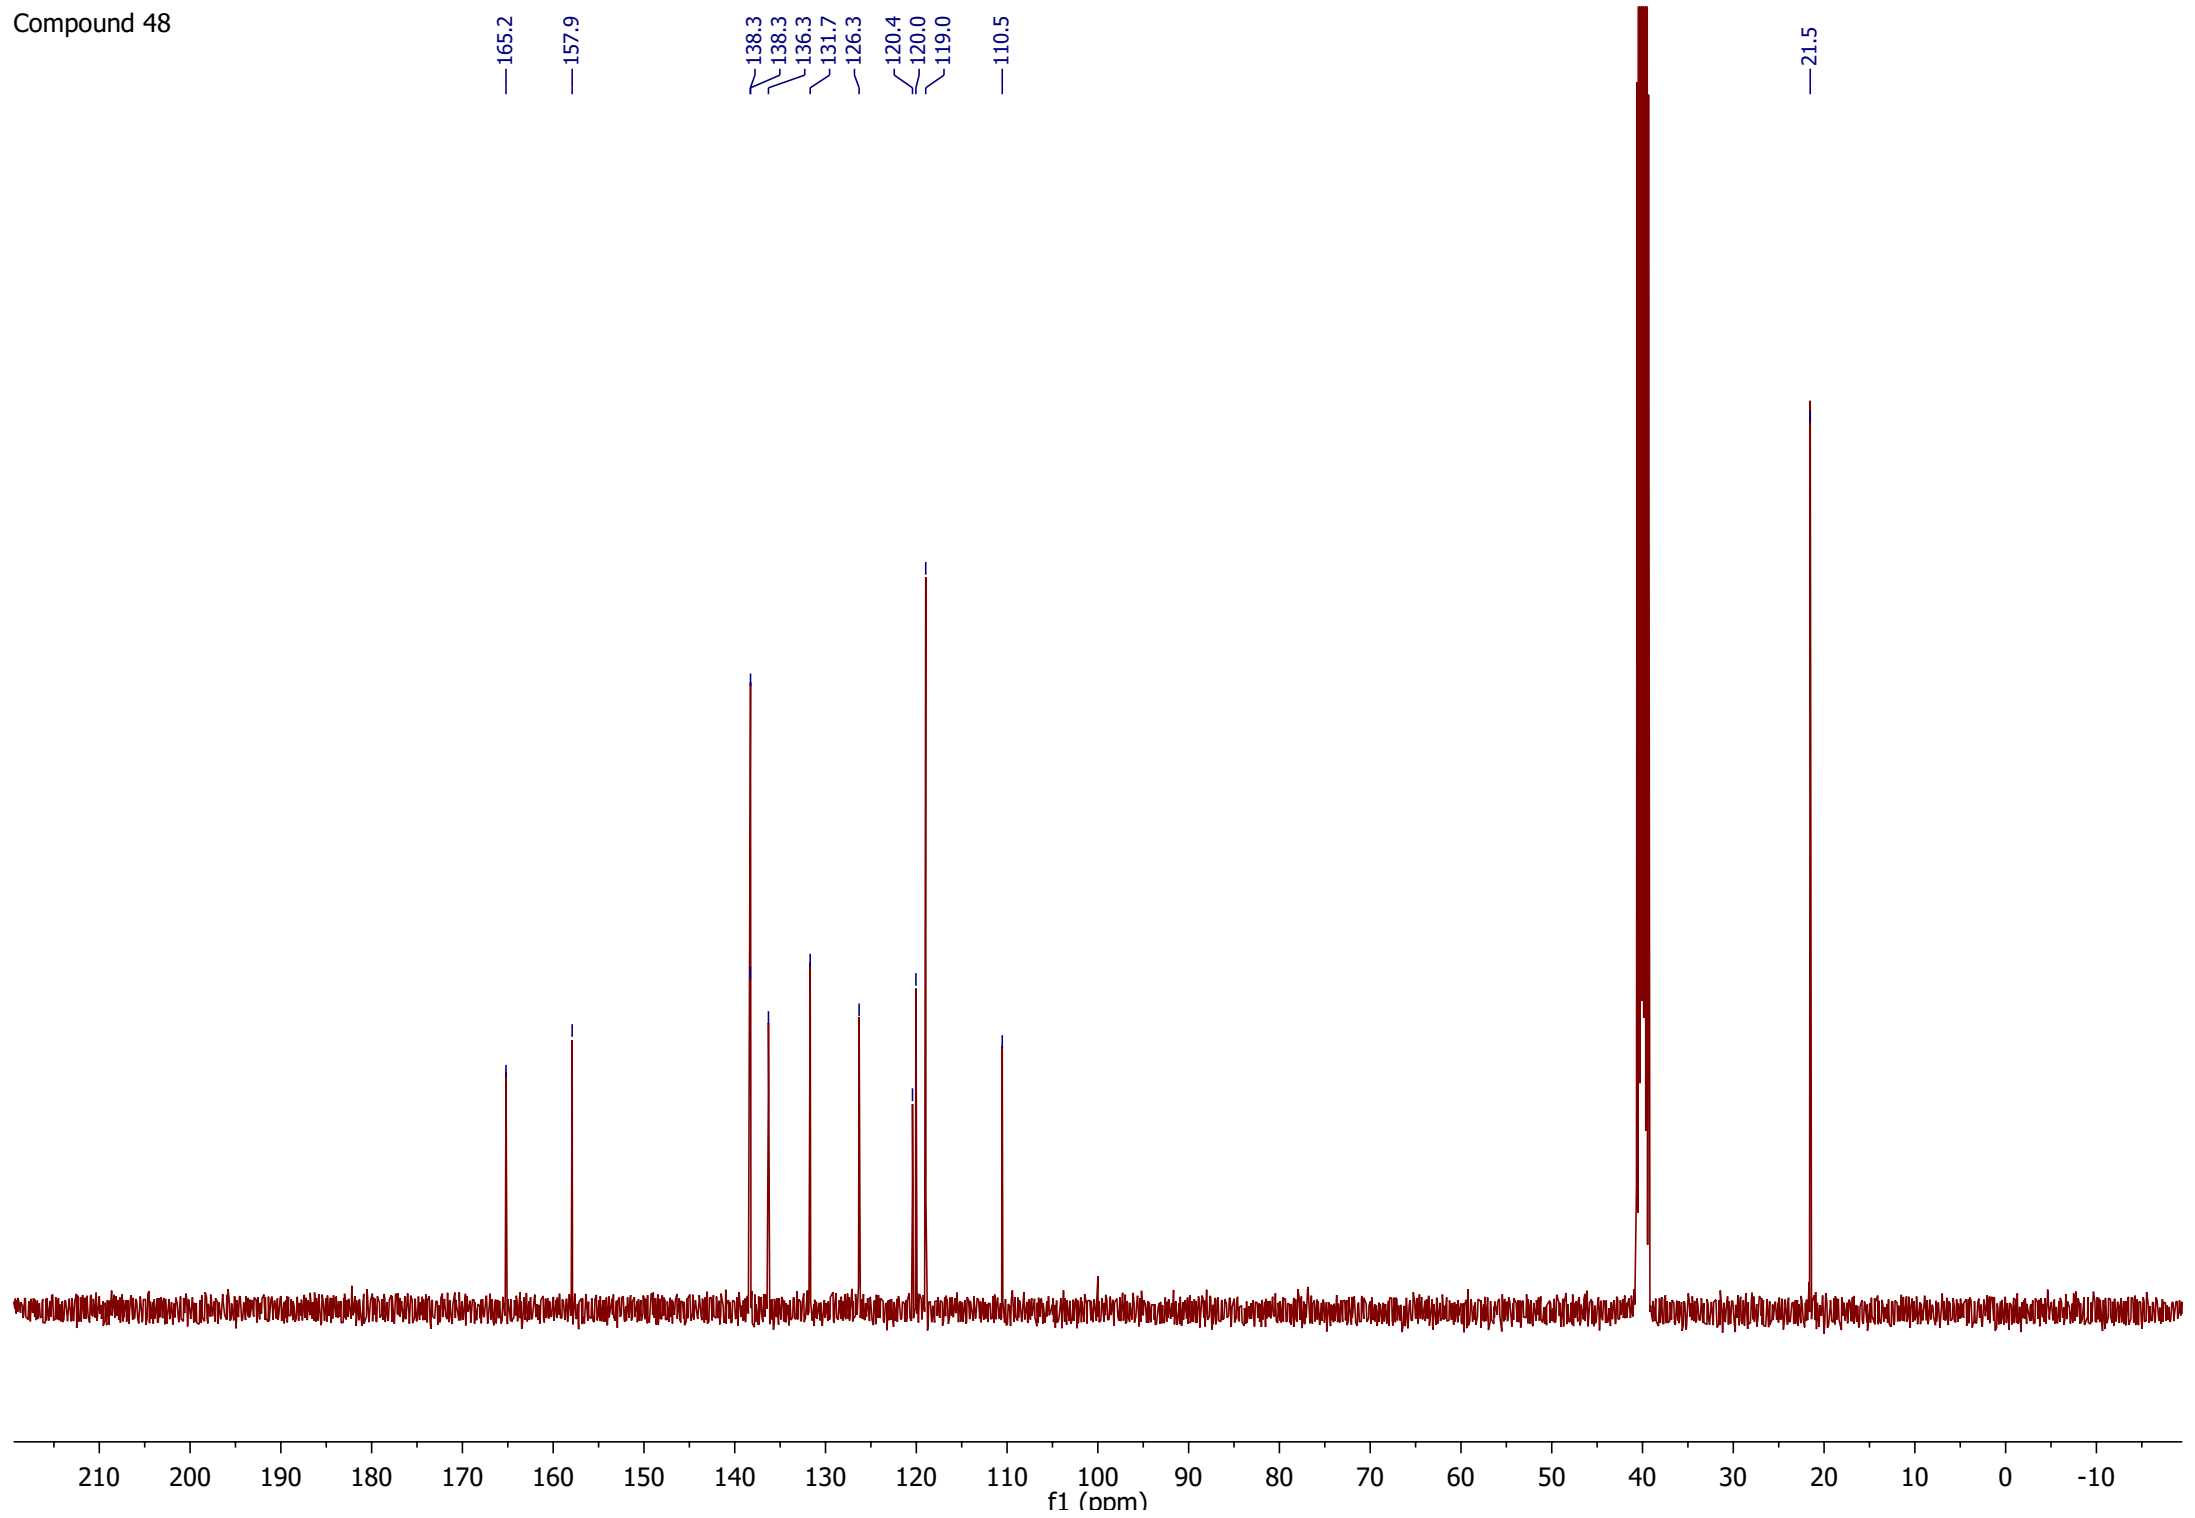

Compound 49

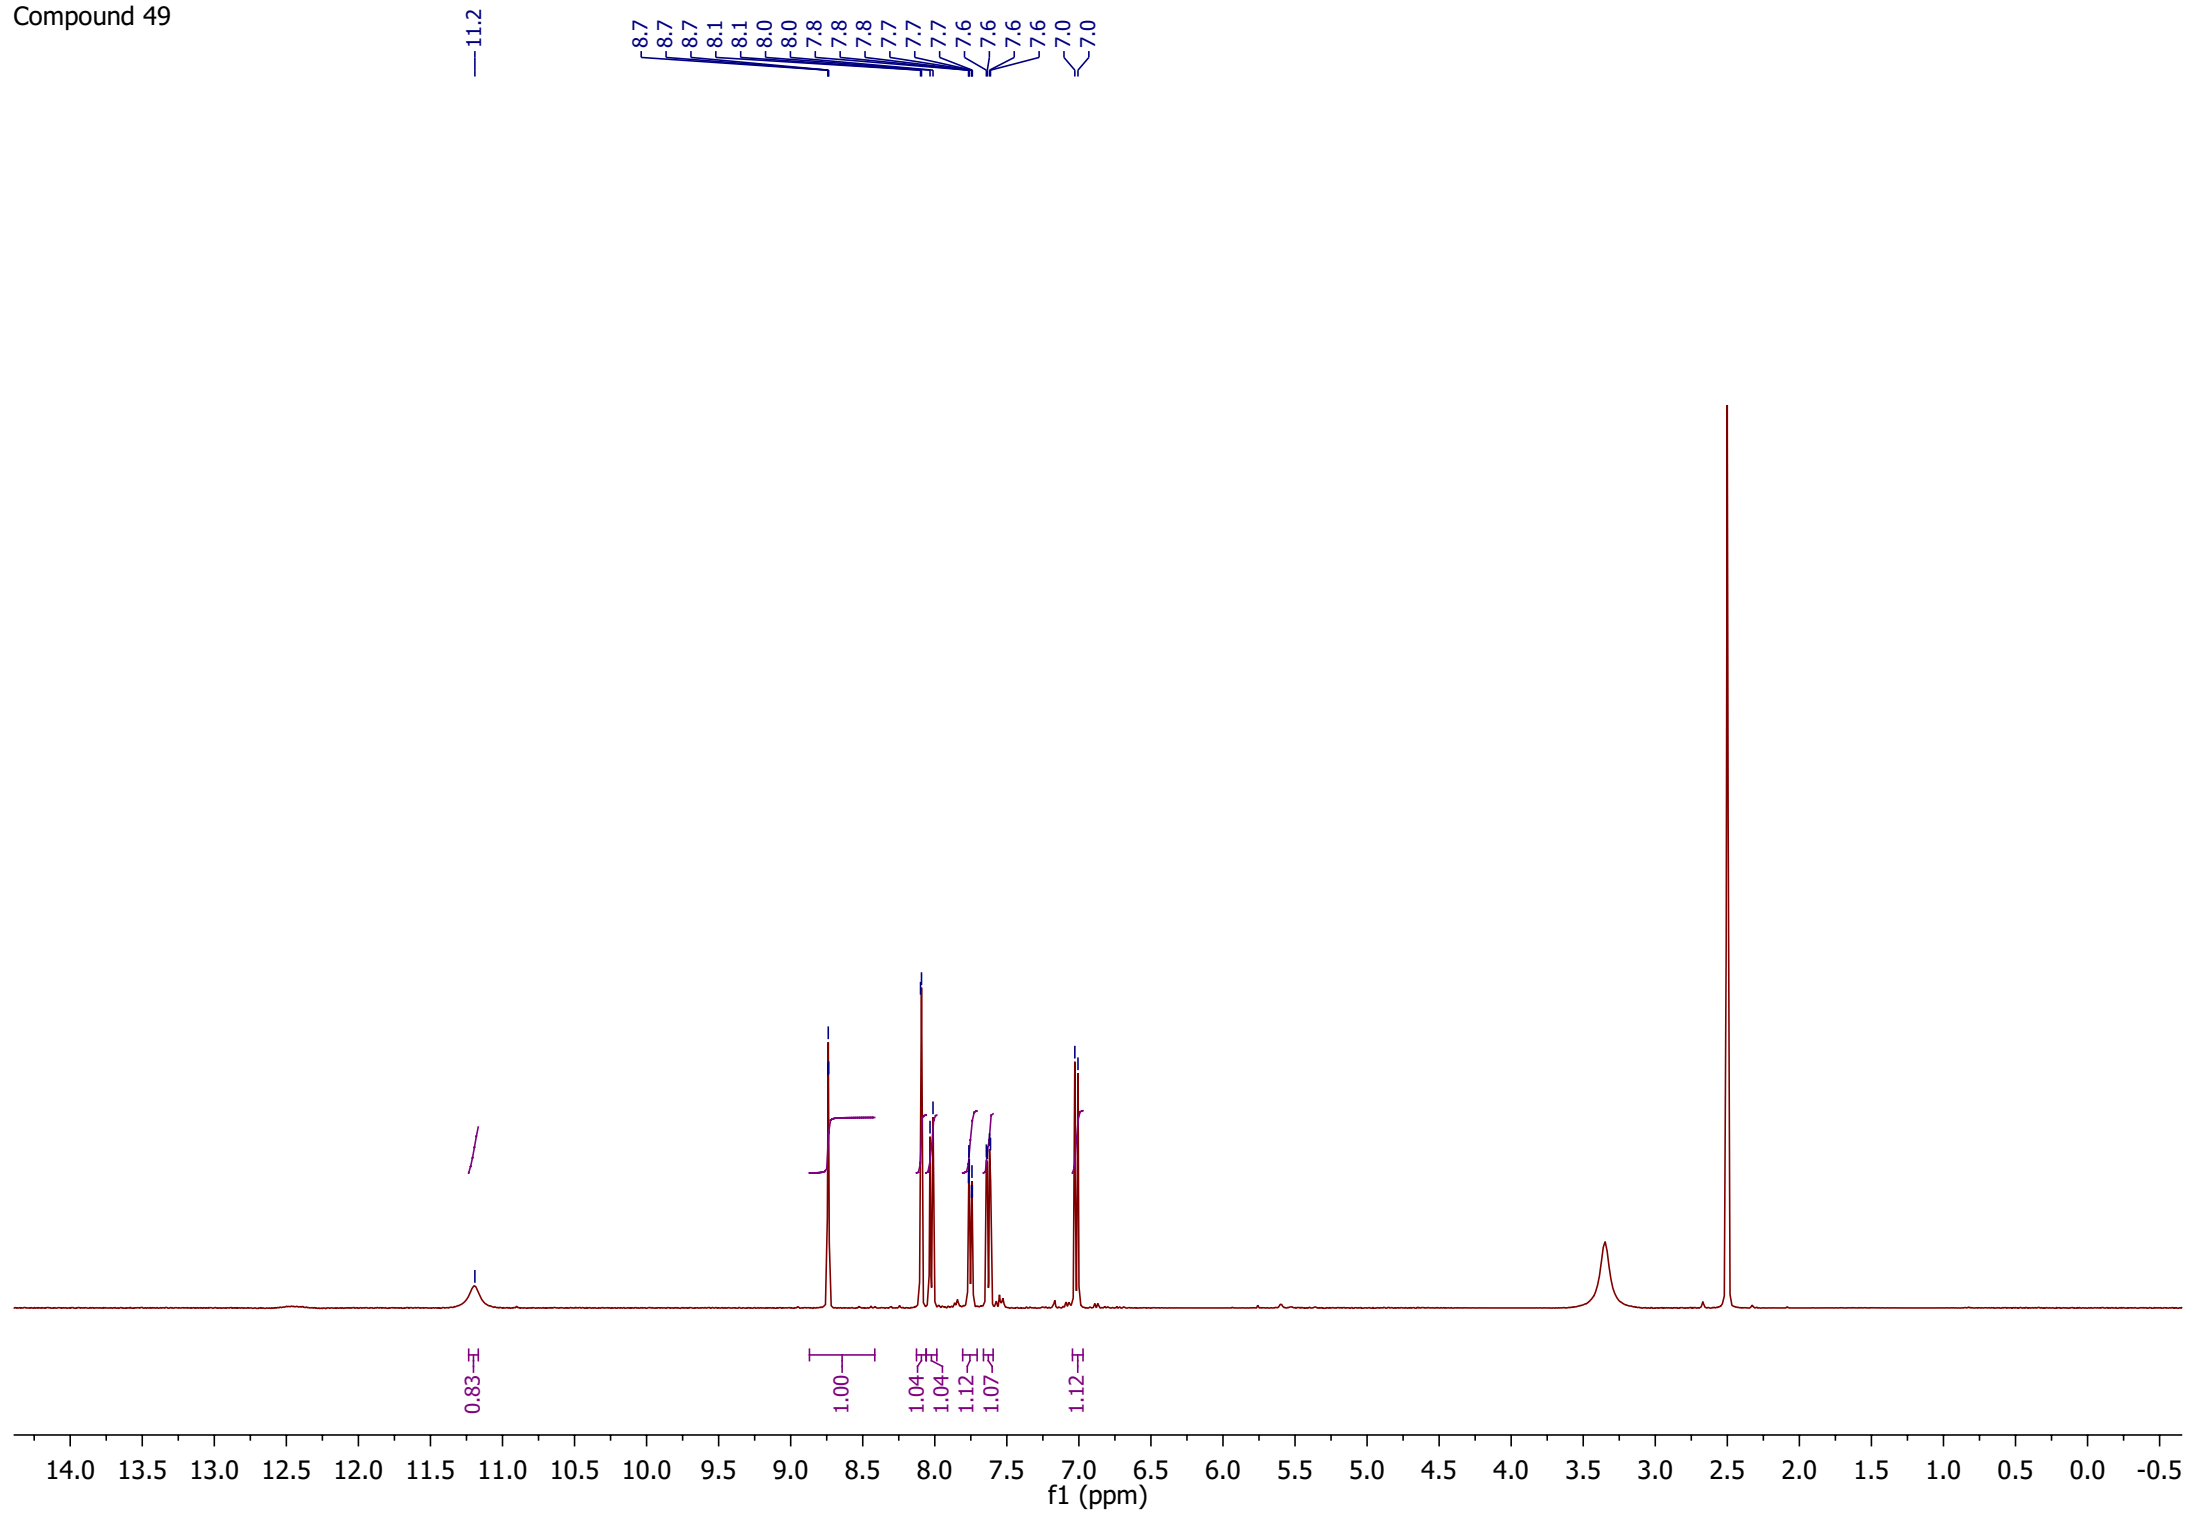

Compound 49

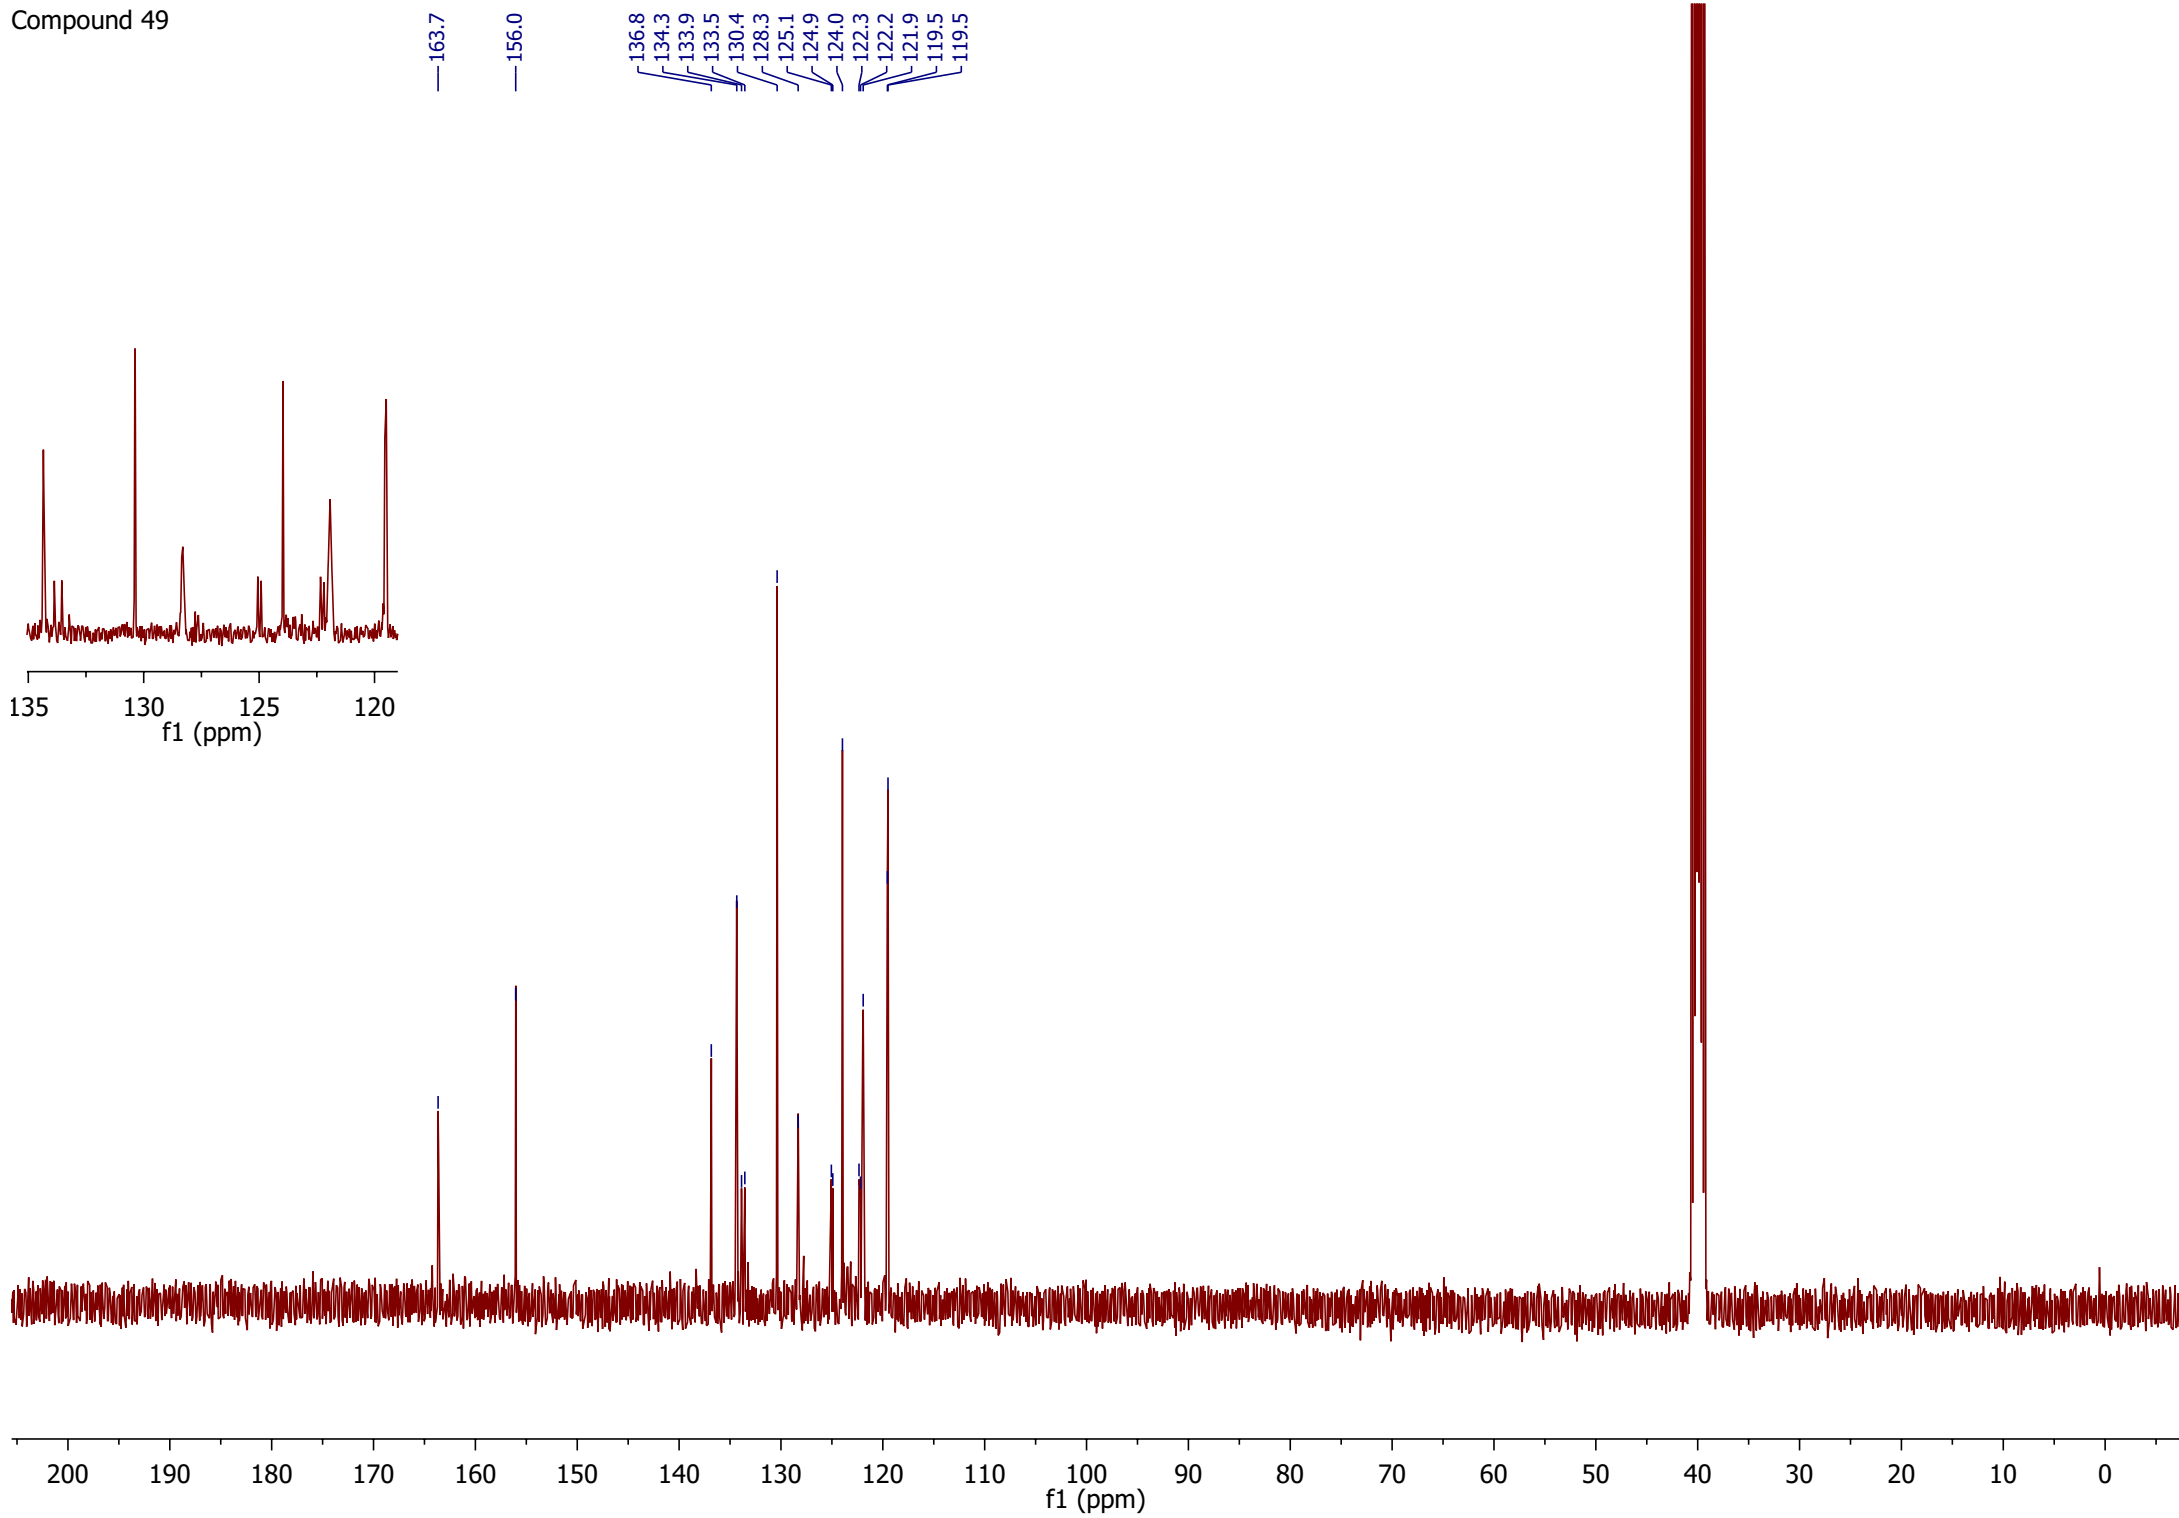

Compound 50

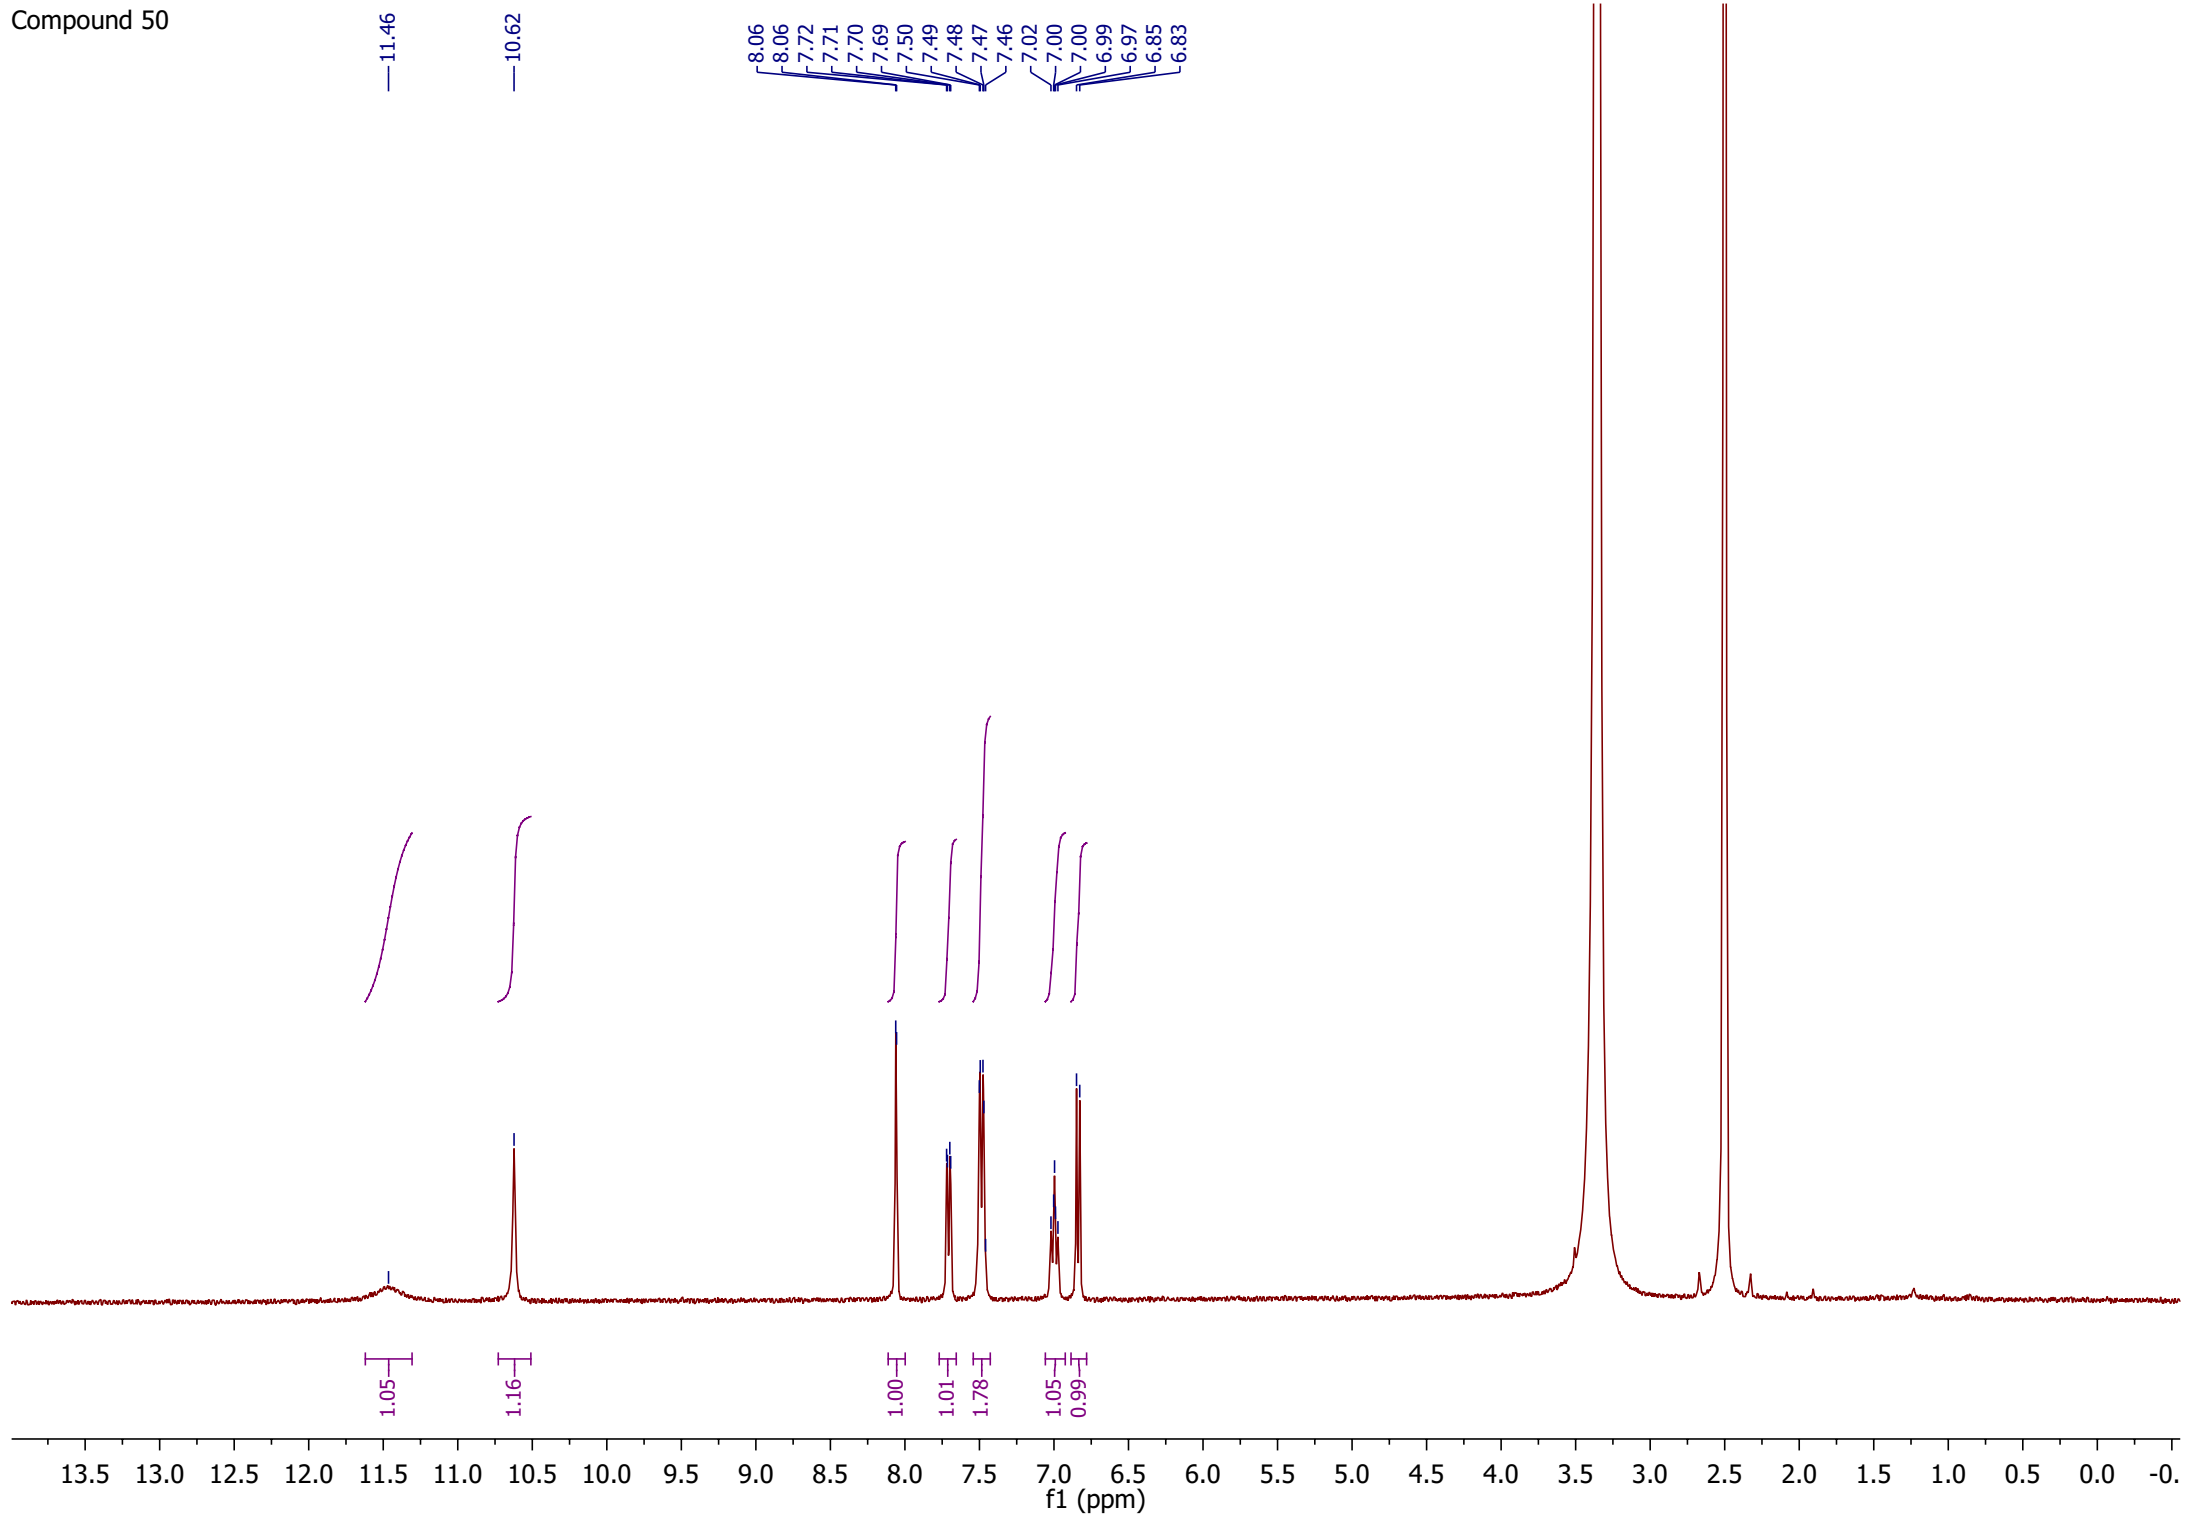

Compound 50

165.0  
163.7  
163.6  
161.3  
161.2  
157.1

141.6  
141.0  
140.9  
140.8  
137.3

121.7  
119.8

103.5  
103.5  
103.3  
103.3  
99.5  
99.3  
99.0

81.1

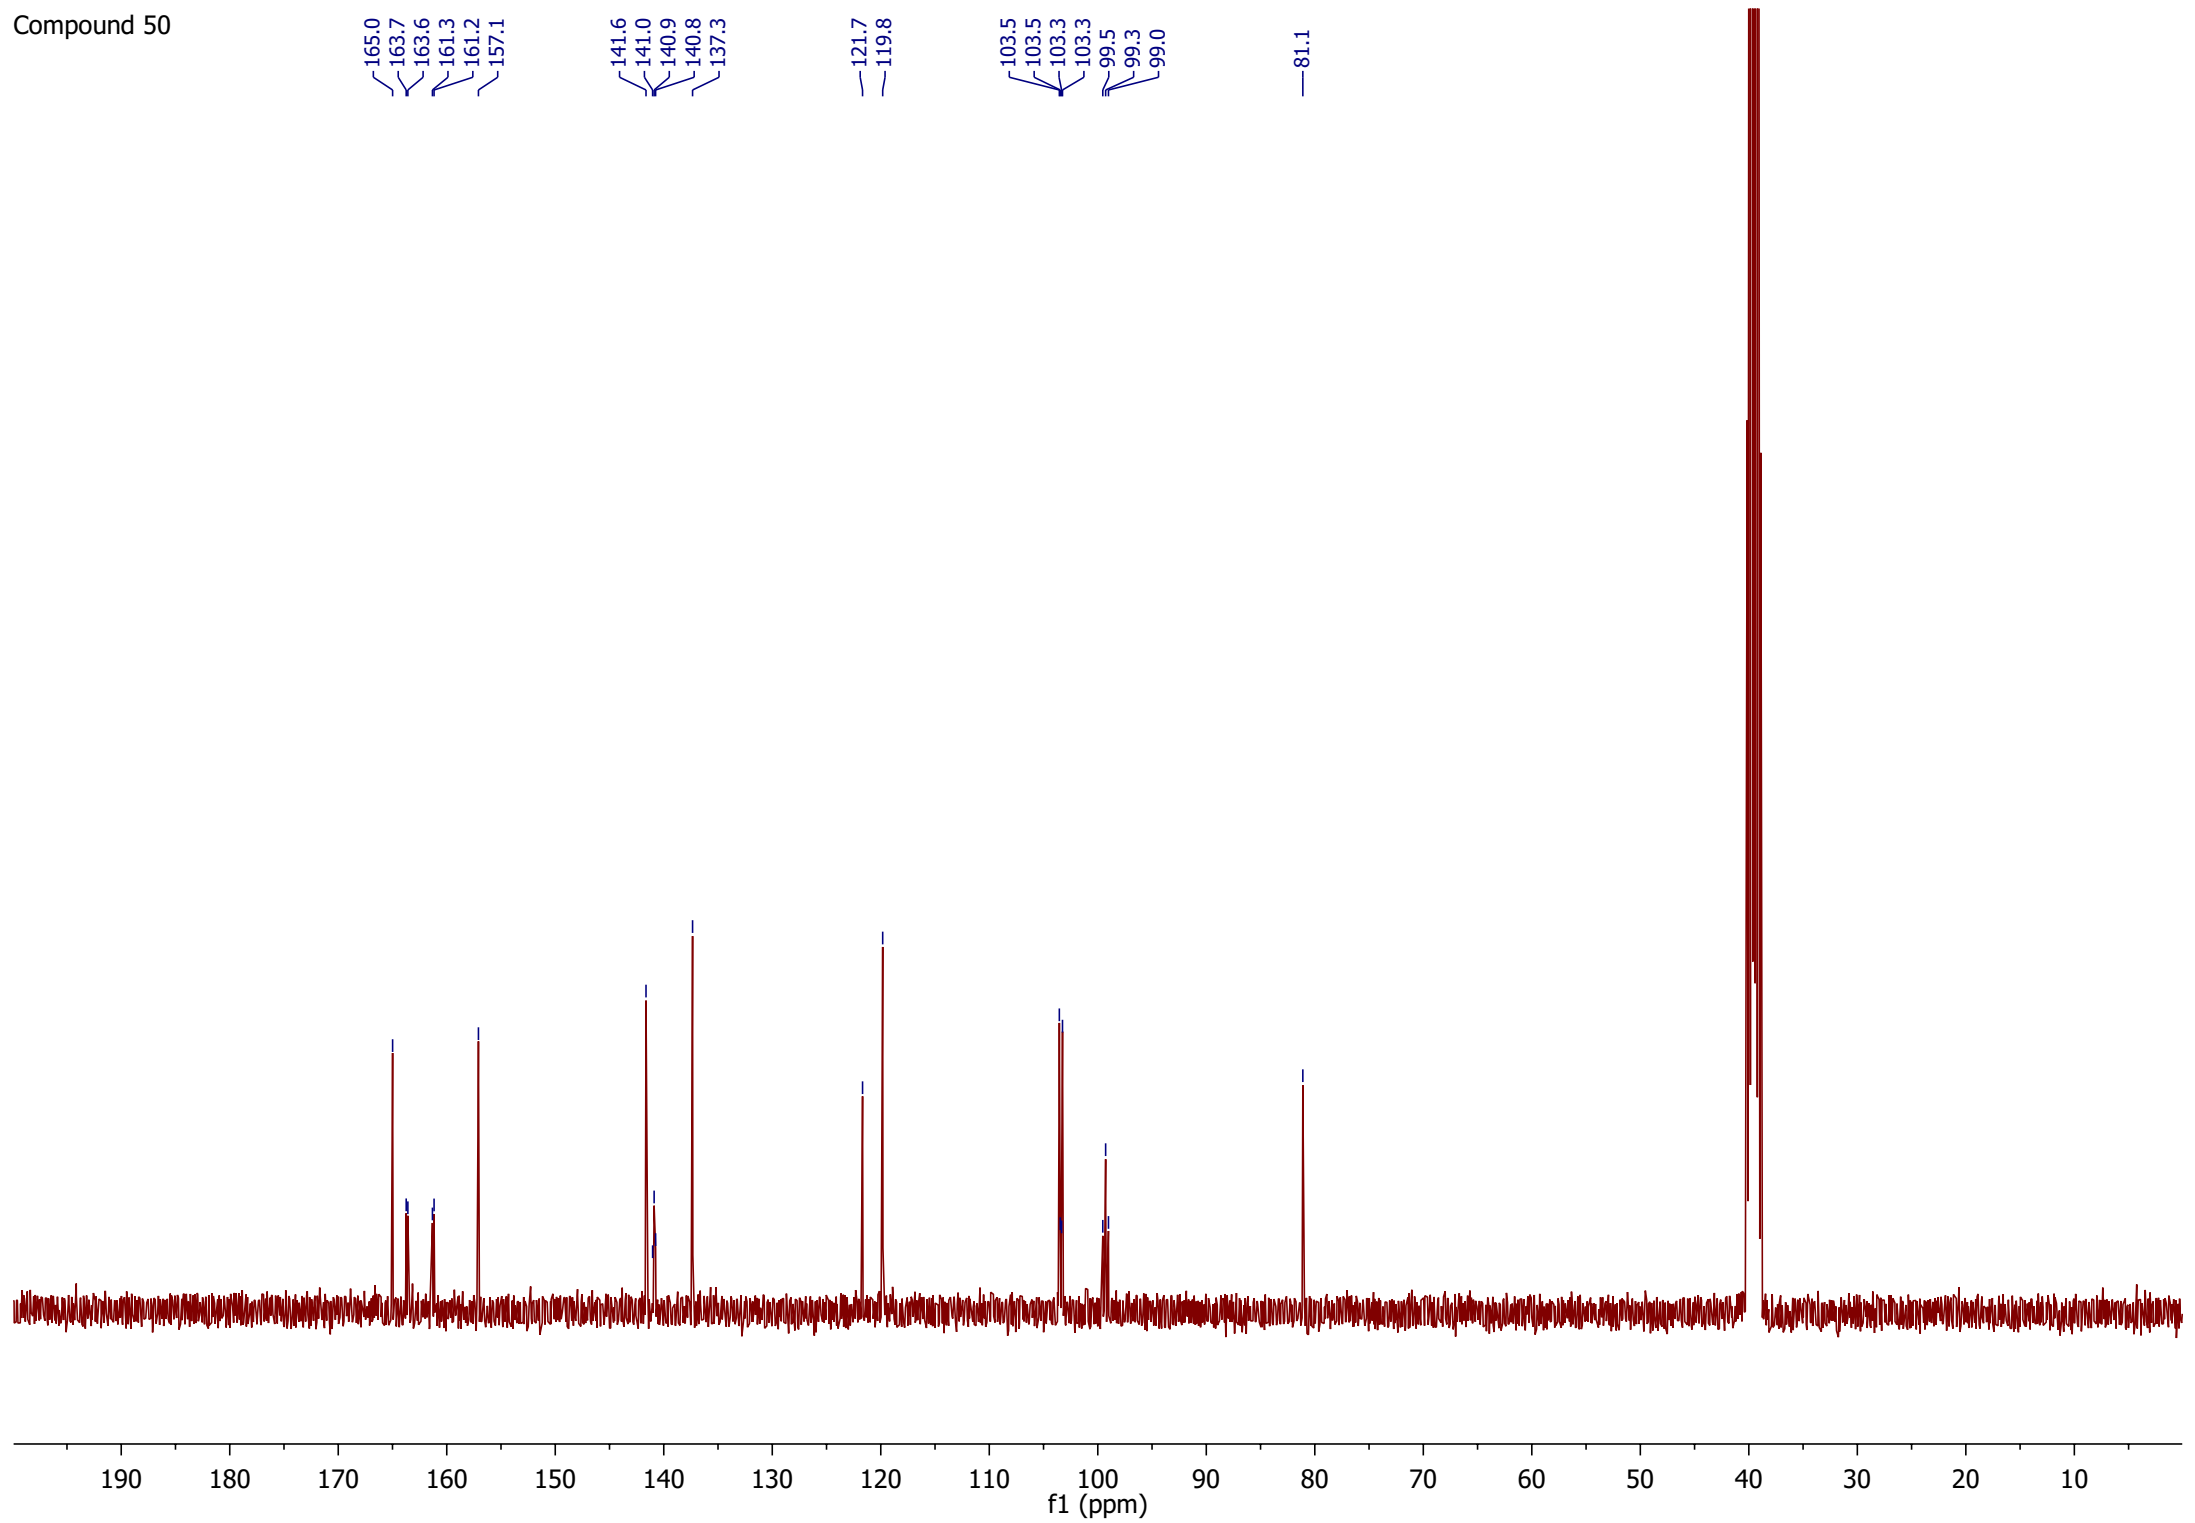

Compound 51

11.47  
11.45

10.64

8.07  
8.07  
7.83  
7.82  
7.72  
7.71  
7.70  
7.69  
7.37  
7.36  
7.36  
6.84  
6.82

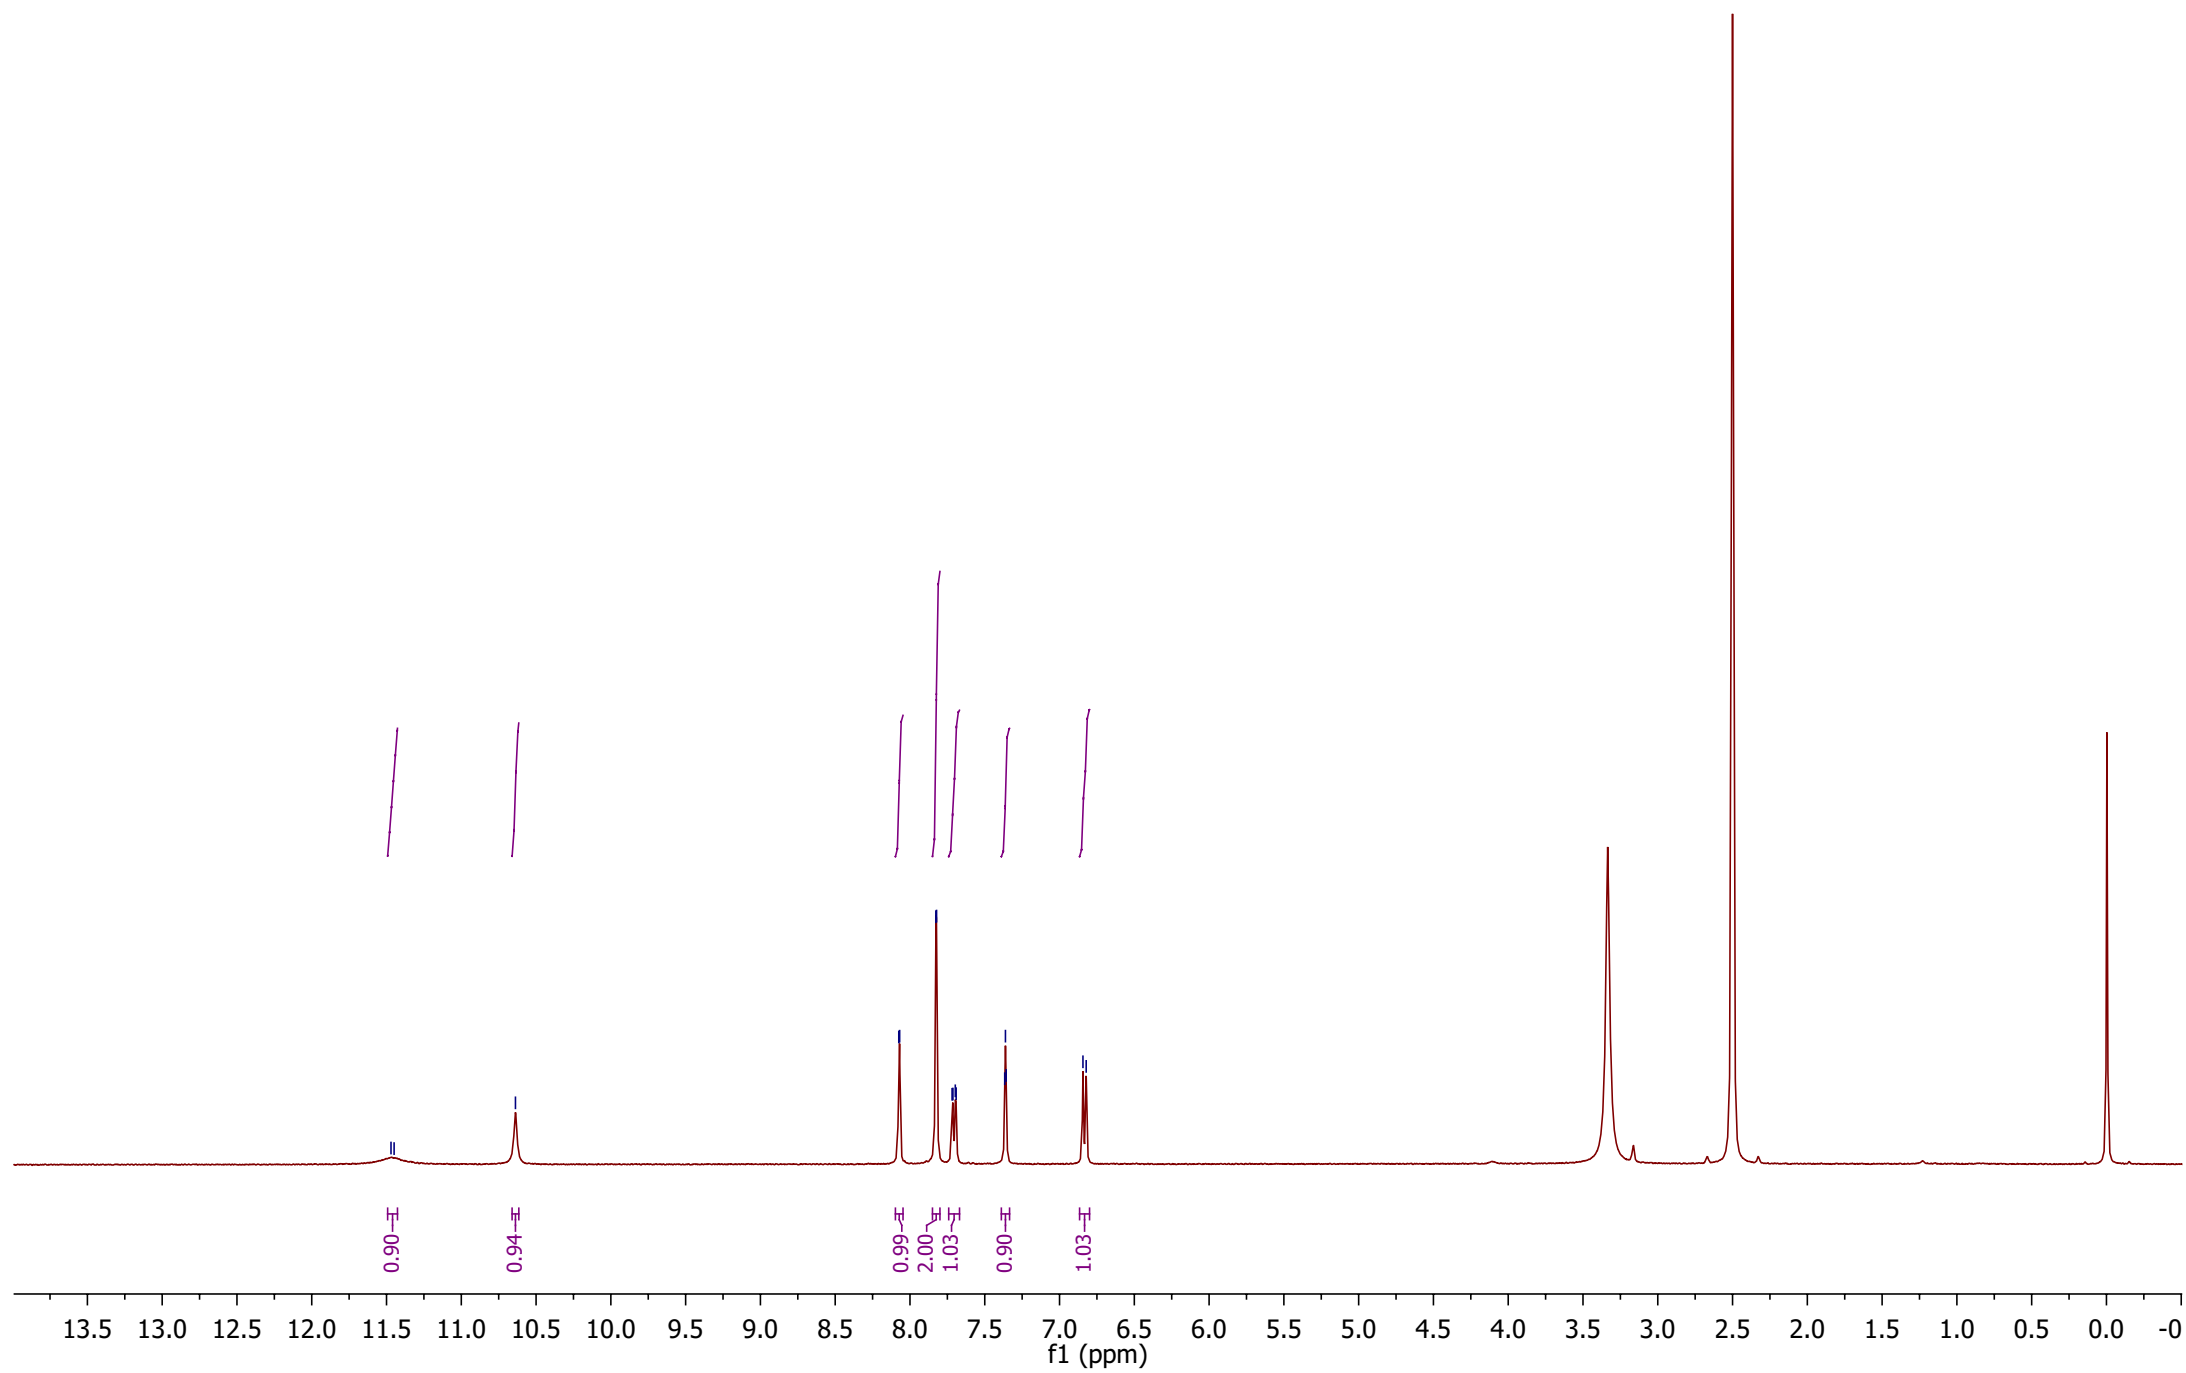

Compound 51

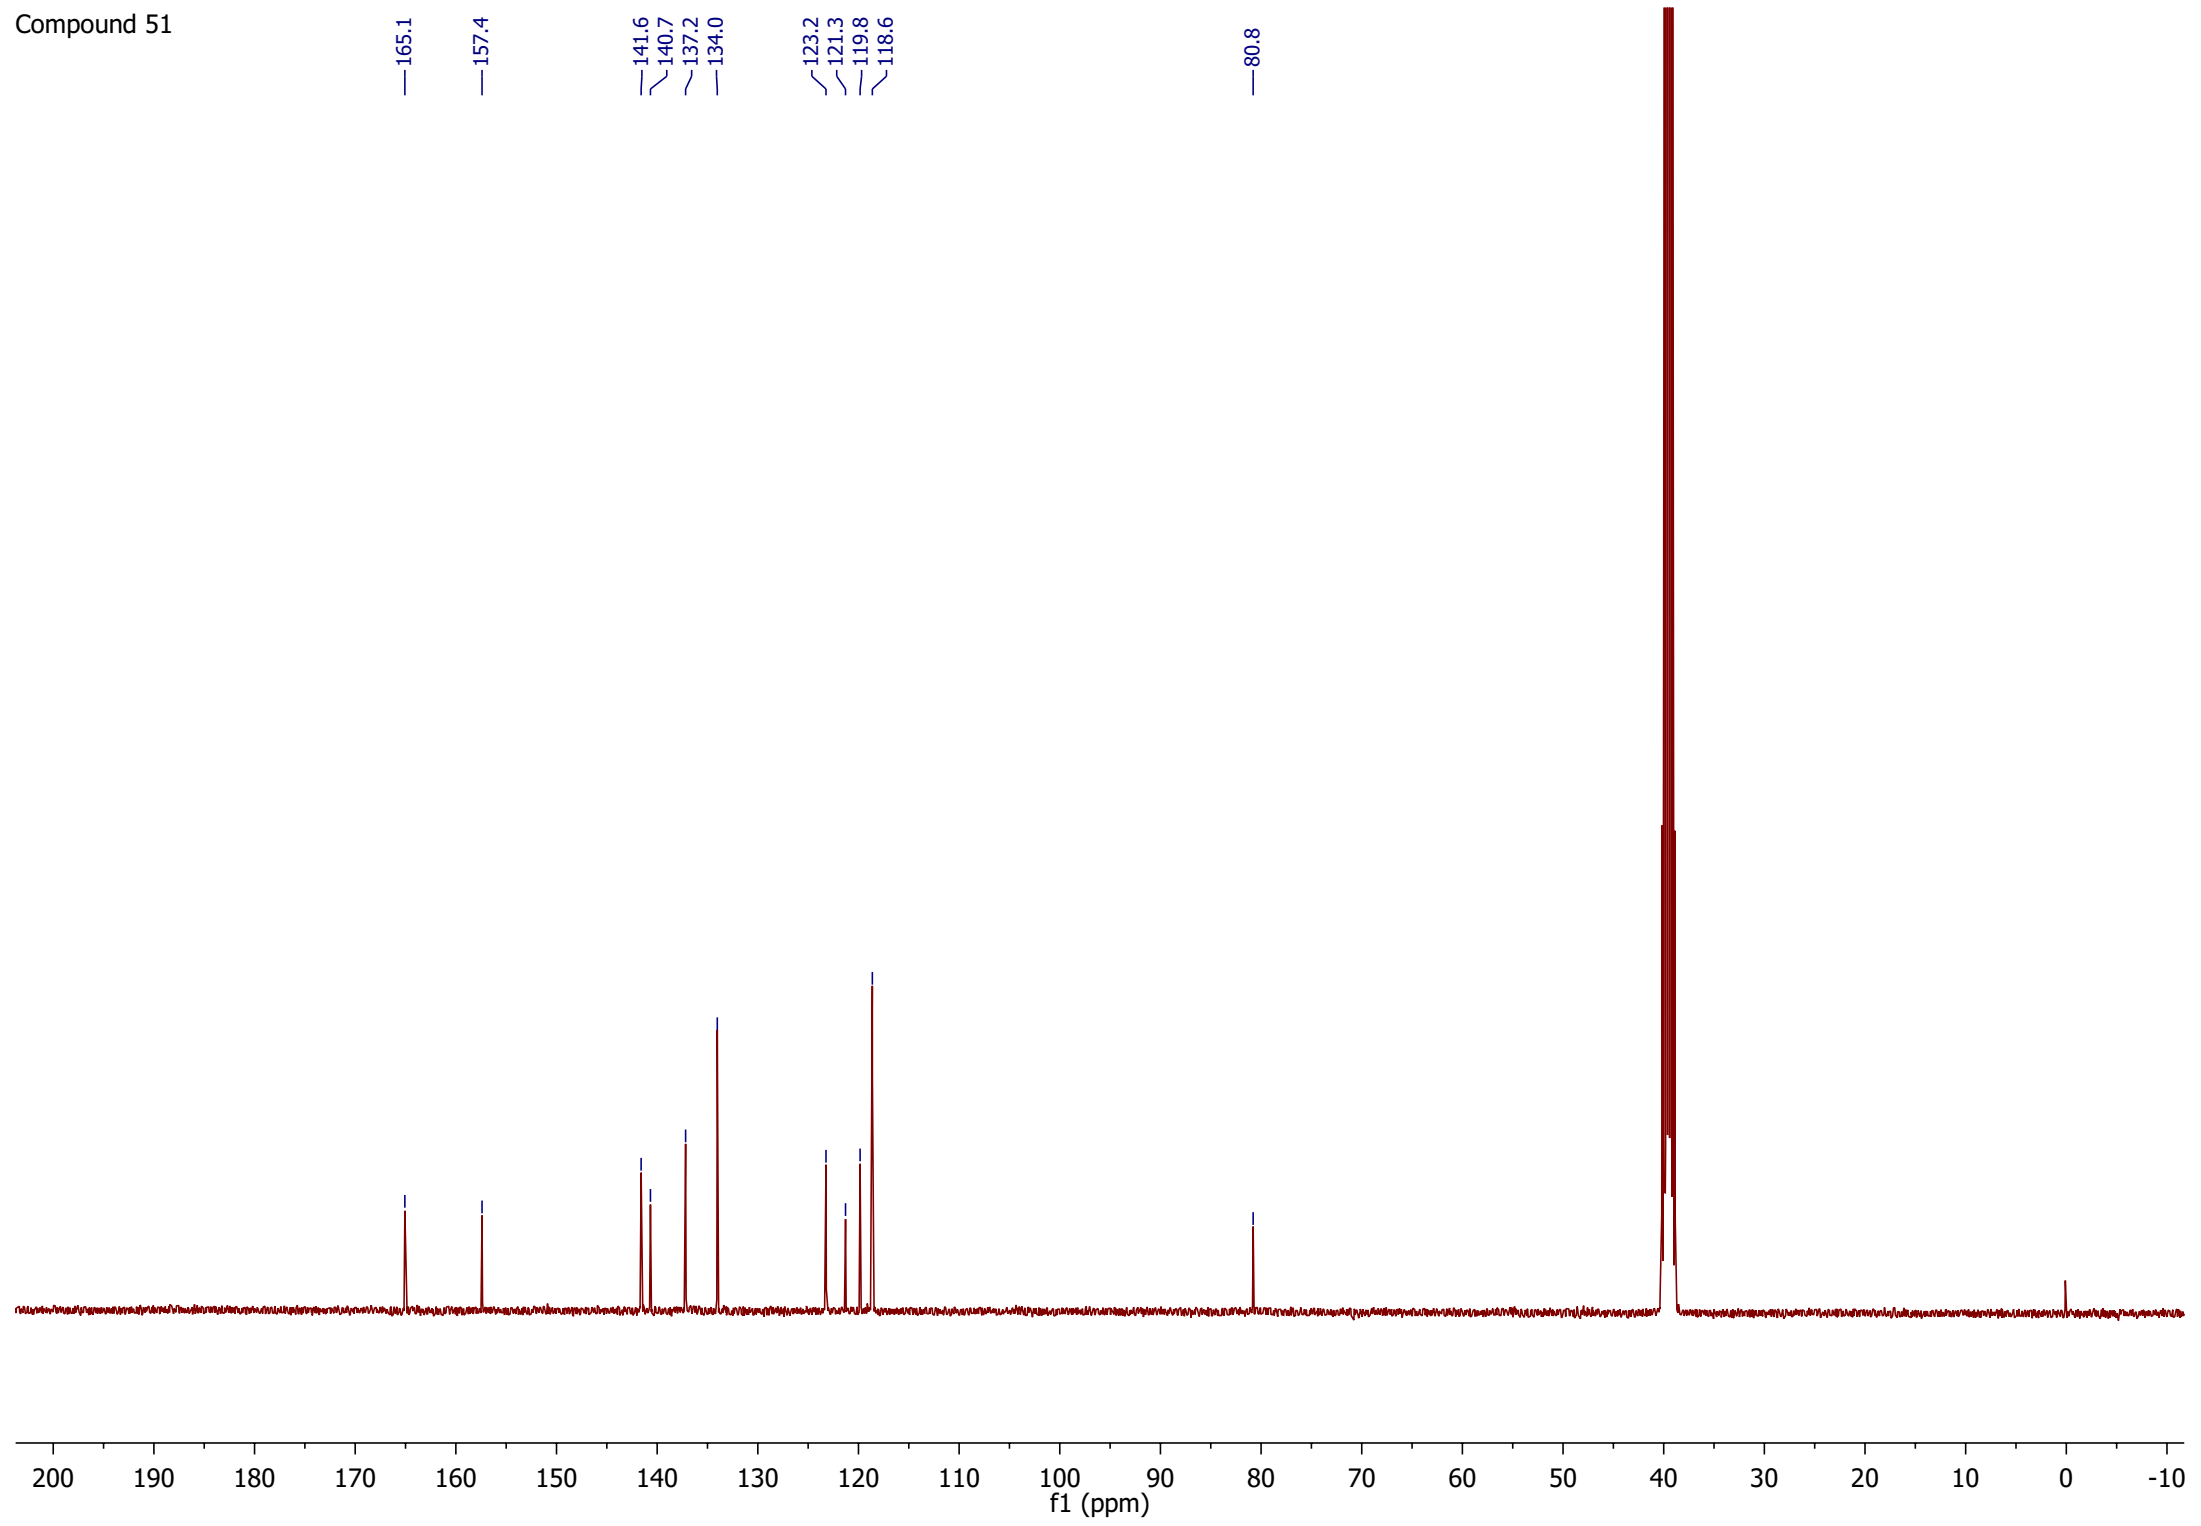

Compound 52

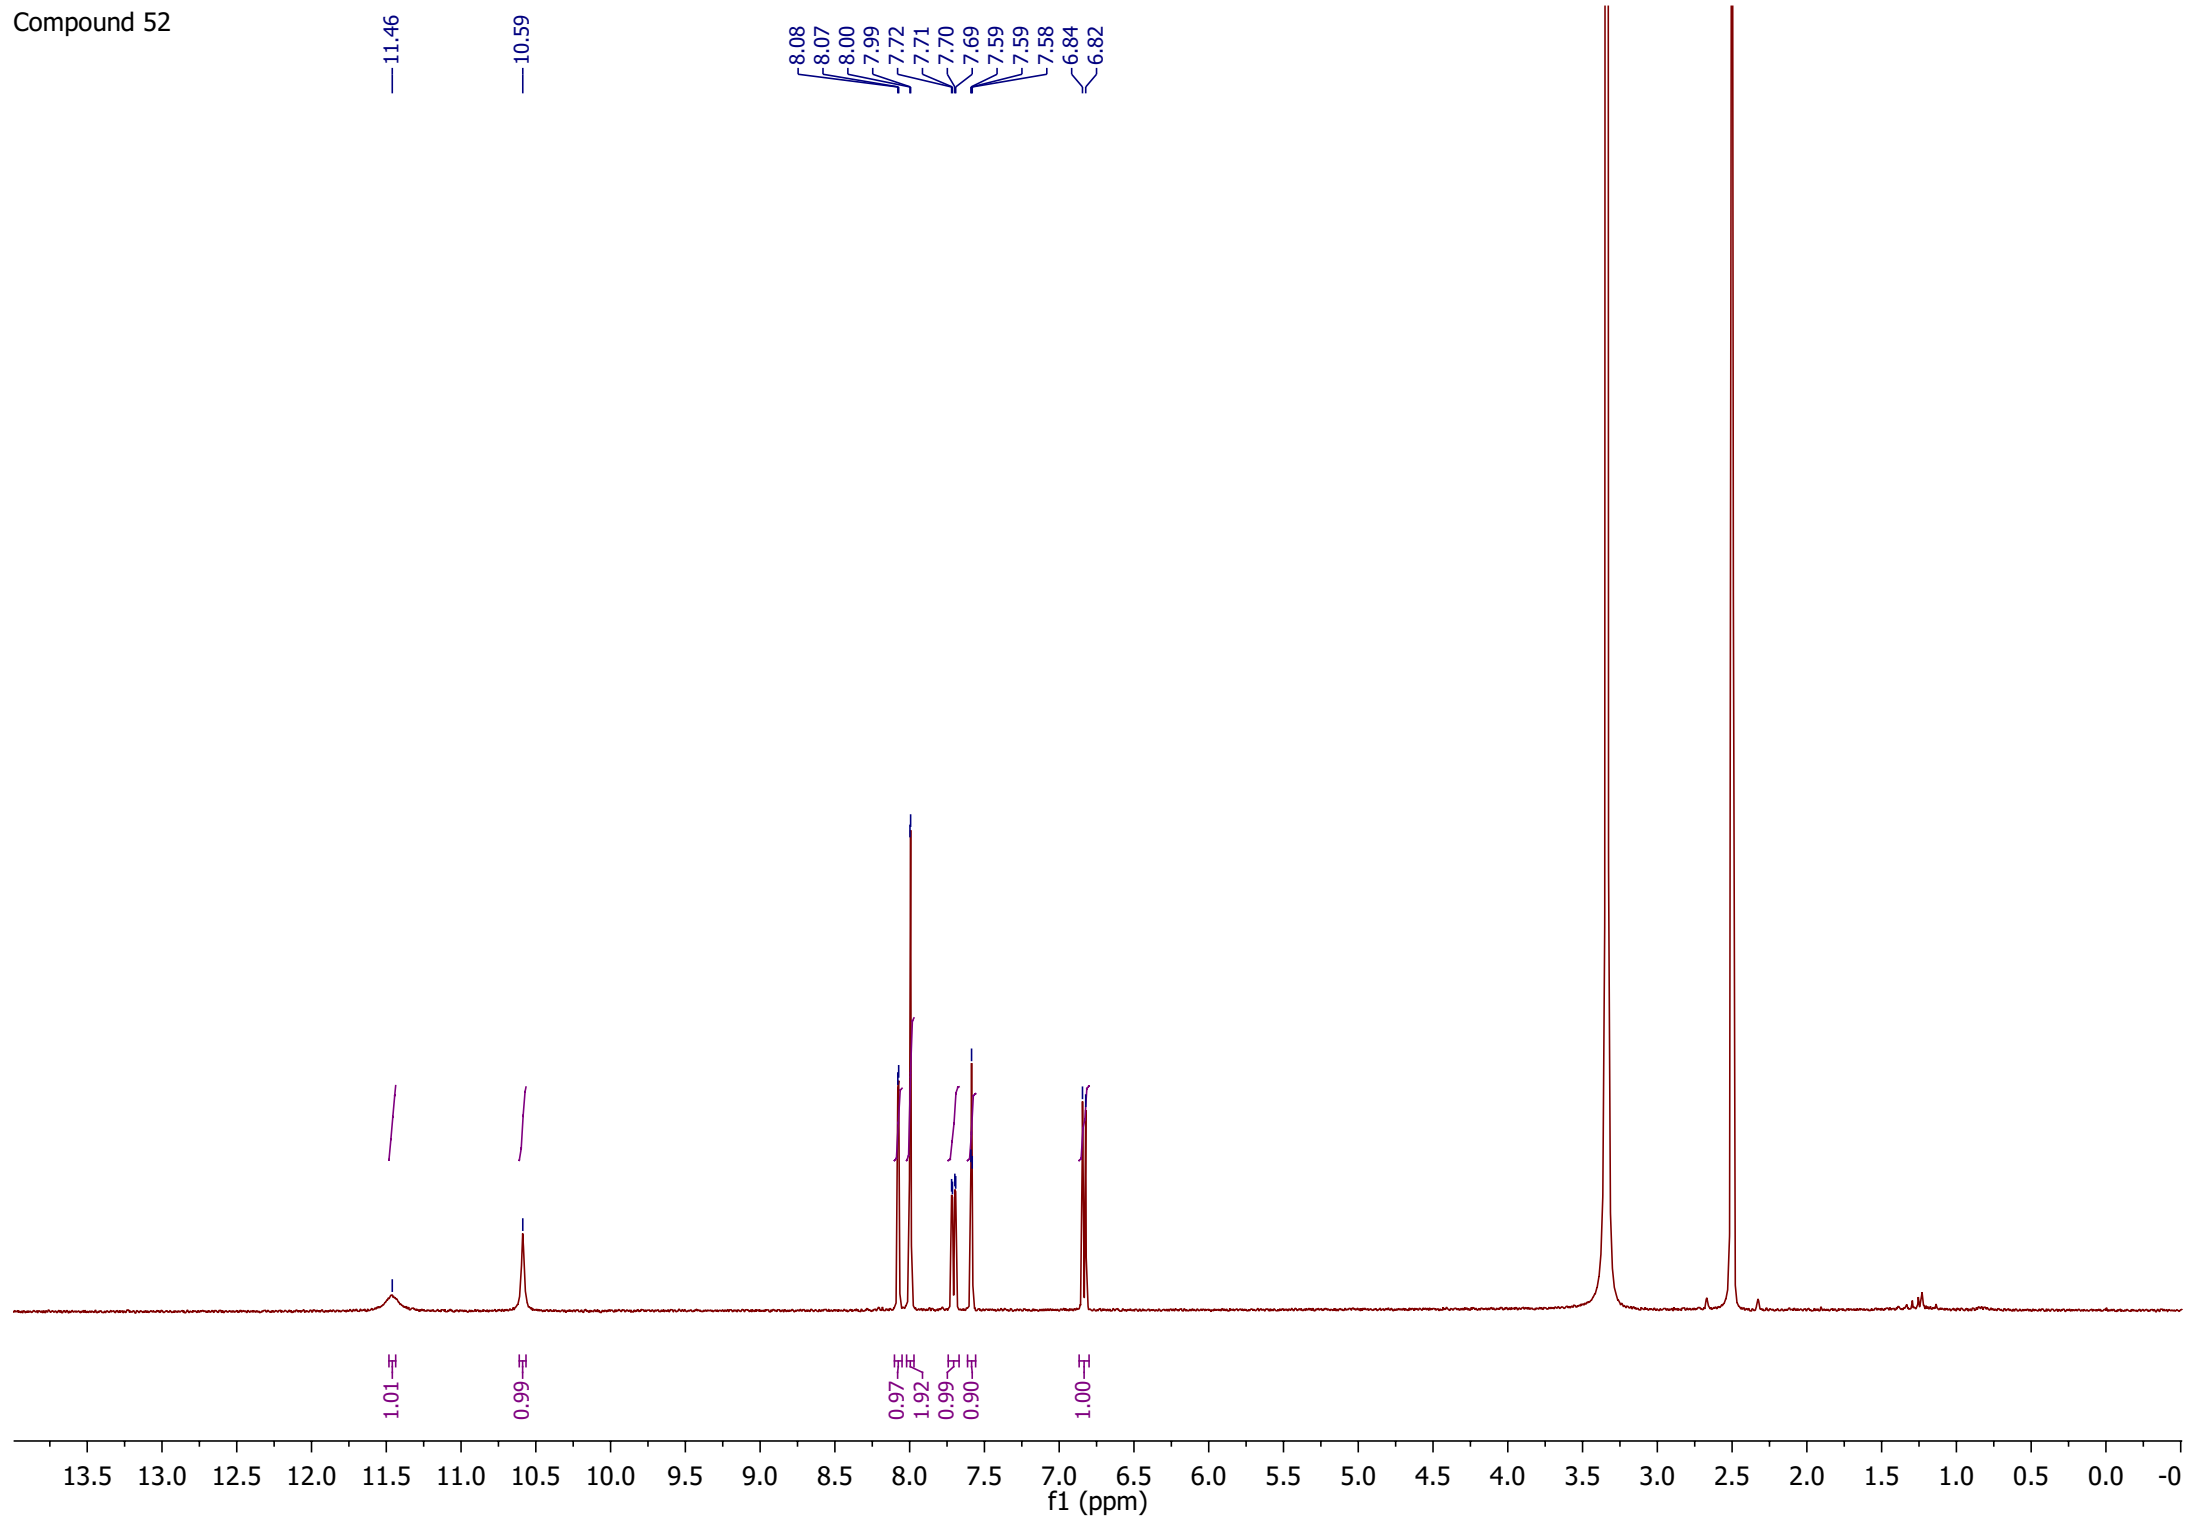



Compound 52

— 165.1

— 158.6

— 141.5

— 141.2

— 137.2

— 128.4

— 122.3

— 121.7

— 121.2

— 120.3

— 79.9

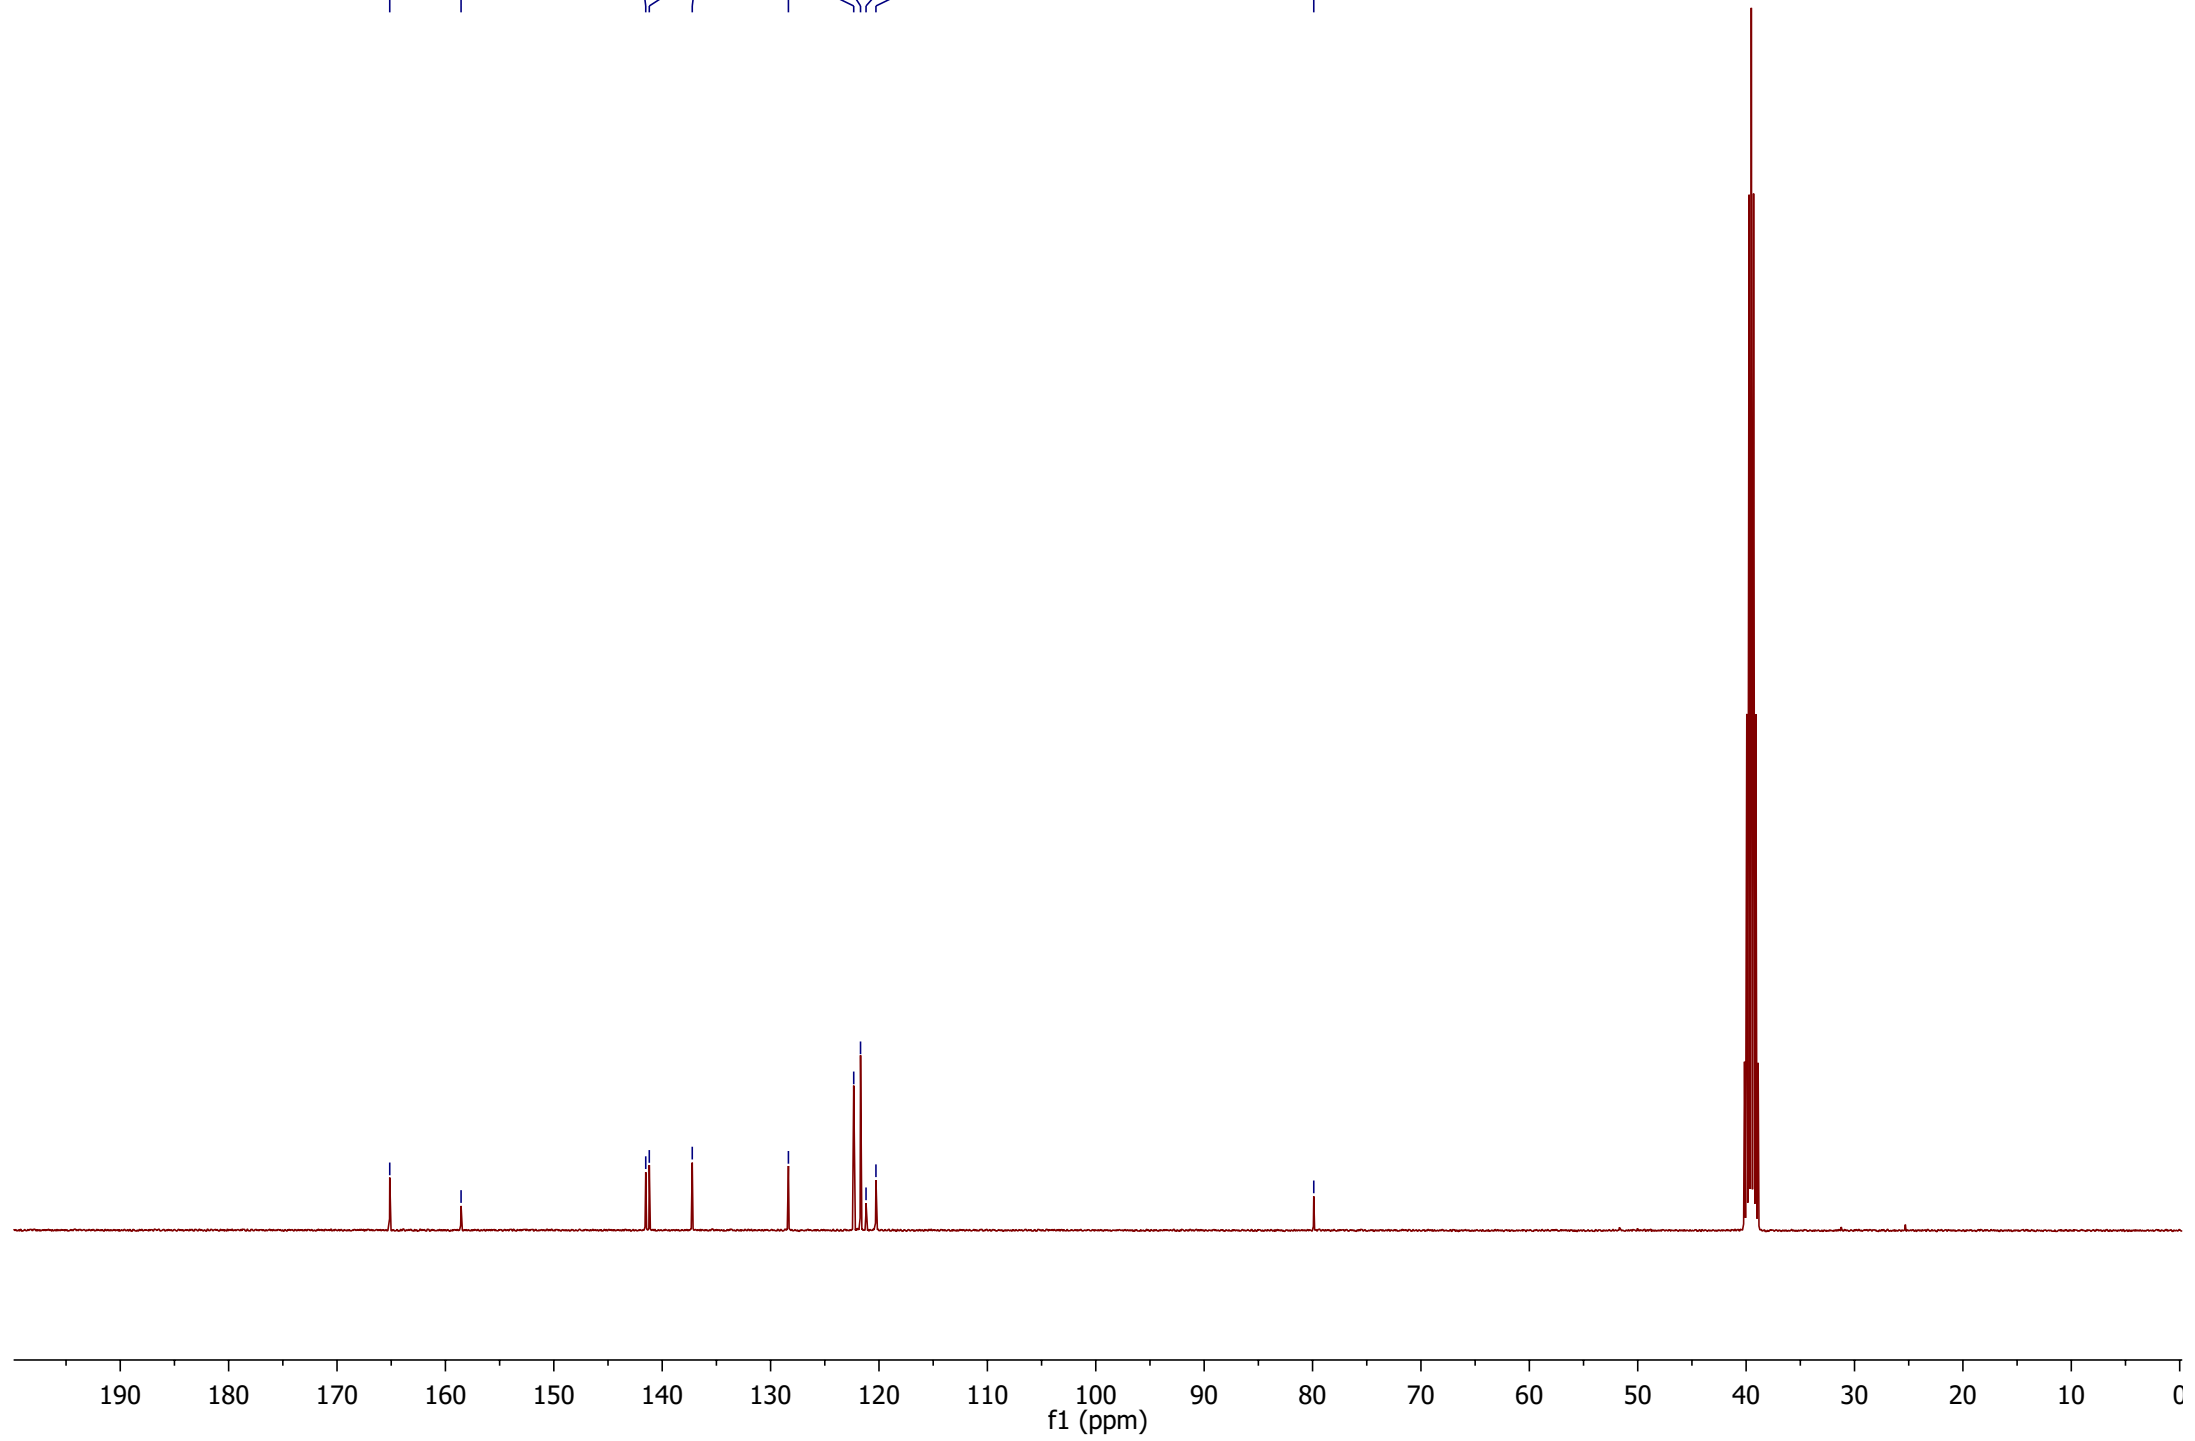

Compound 53

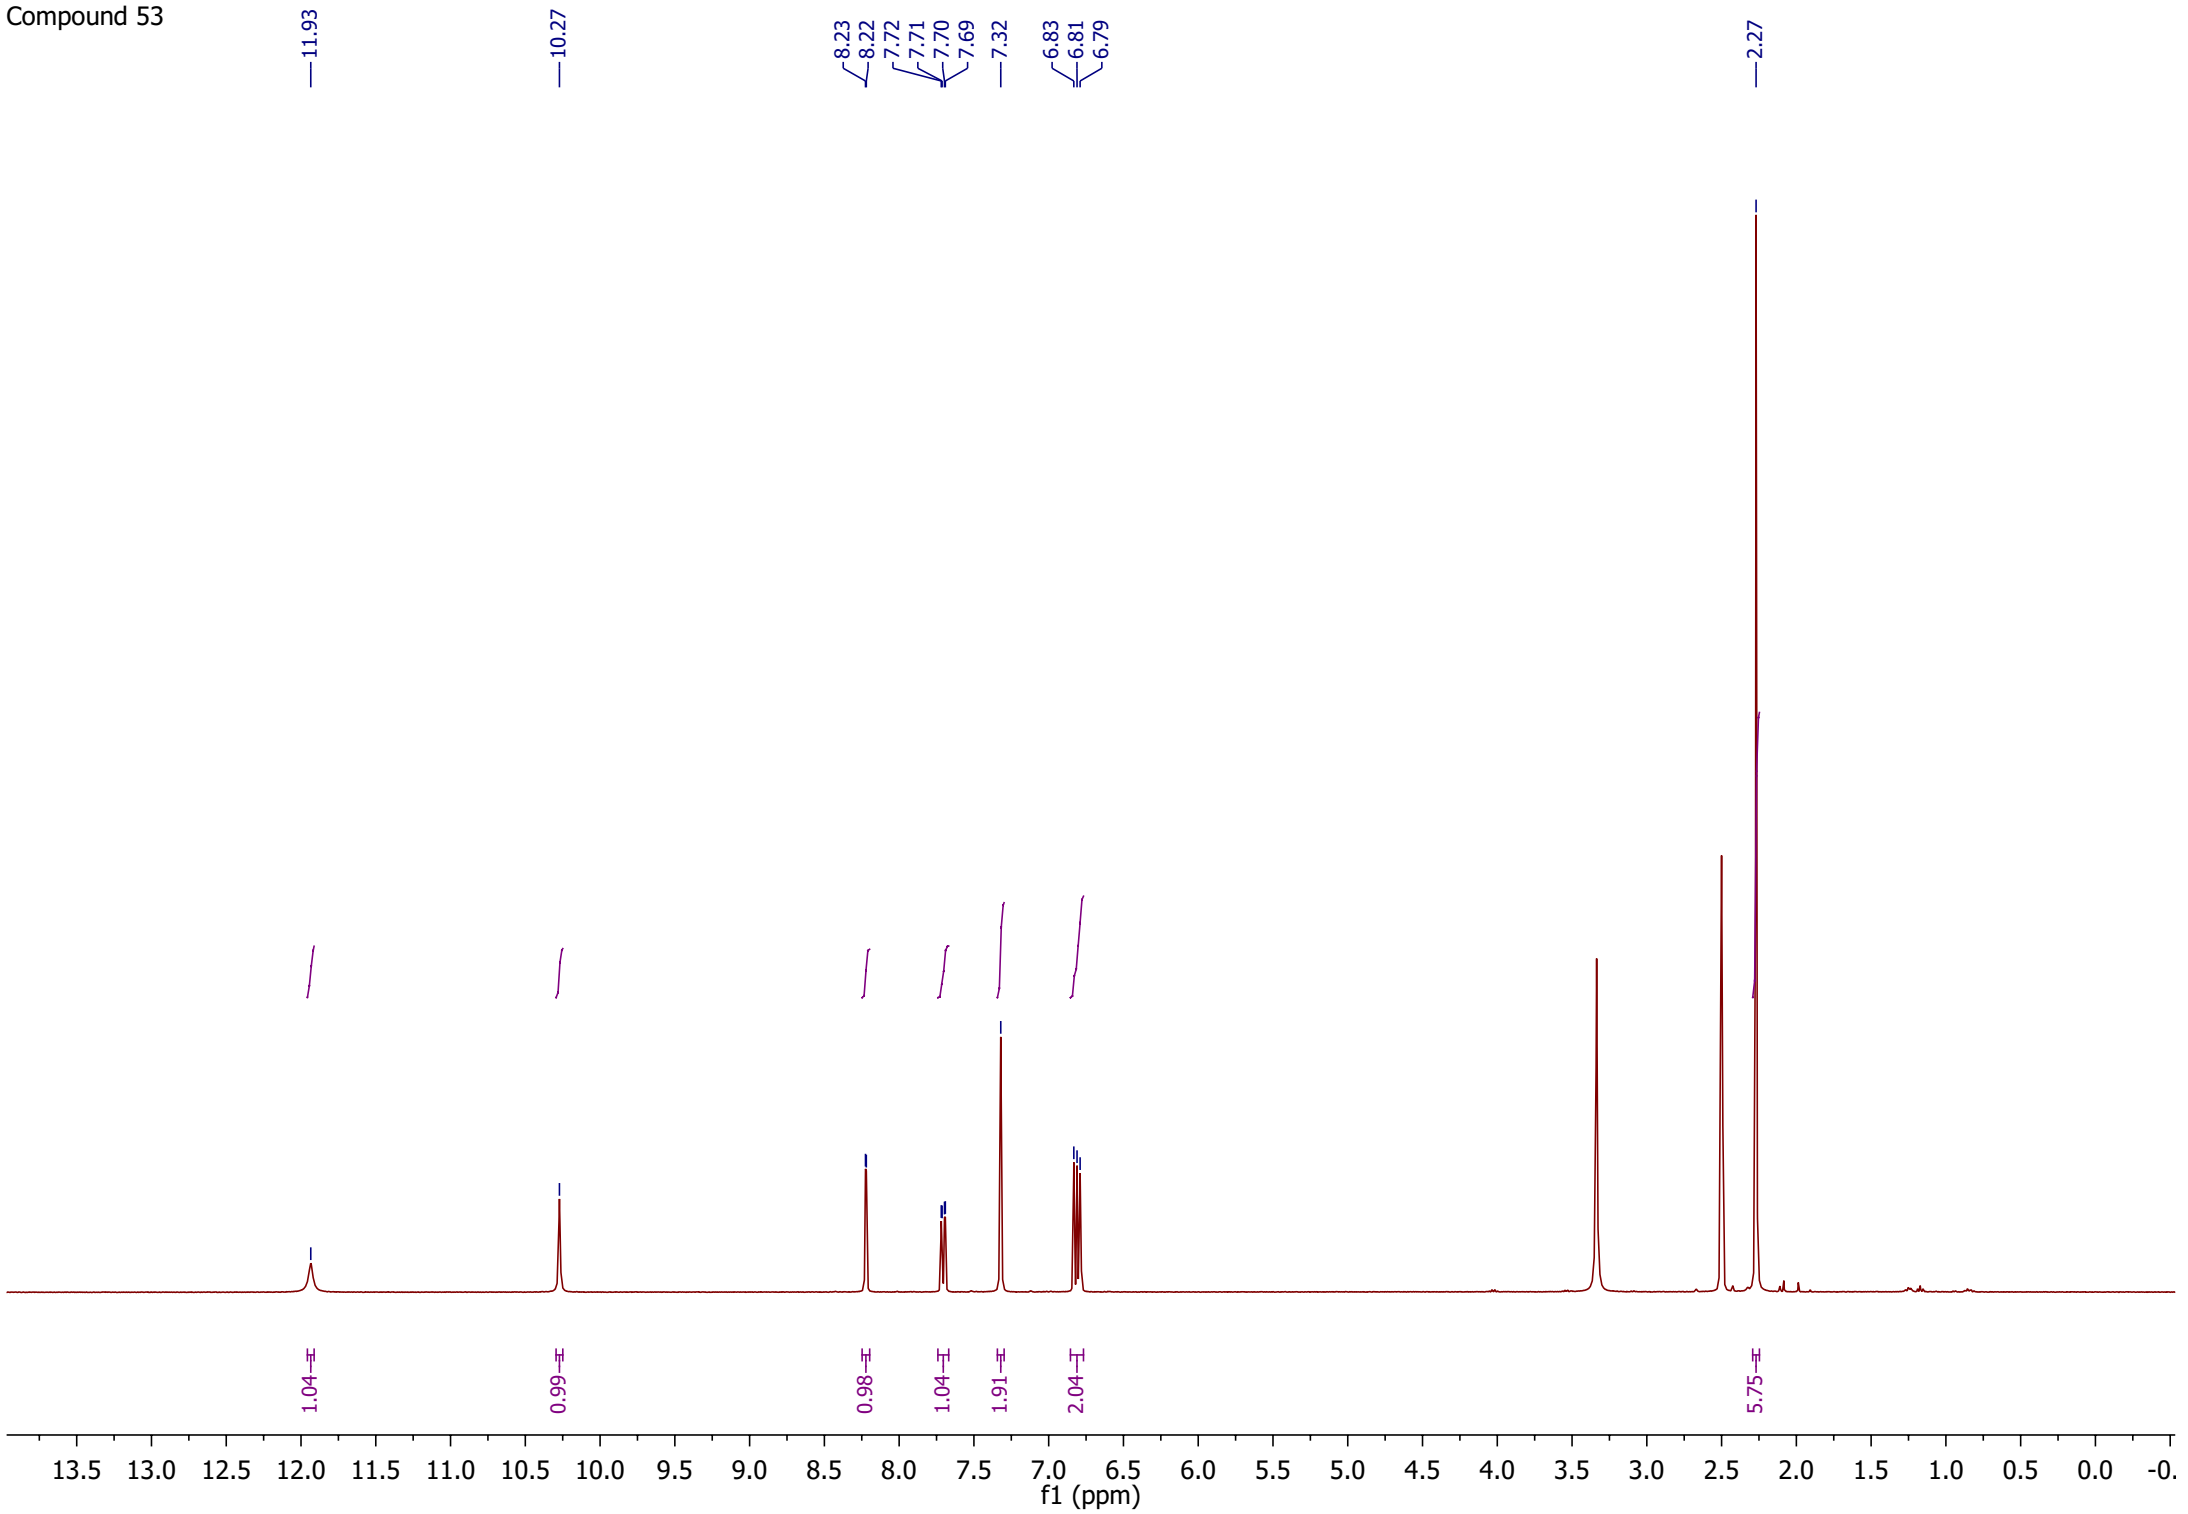

Compound 53

— 164.9

— 158.1

— 141.6

— 137.9

— 137.8

— 137.0

— 125.9

— 120.4

— 120.0

— 118.6

— 81.0

— 21.1

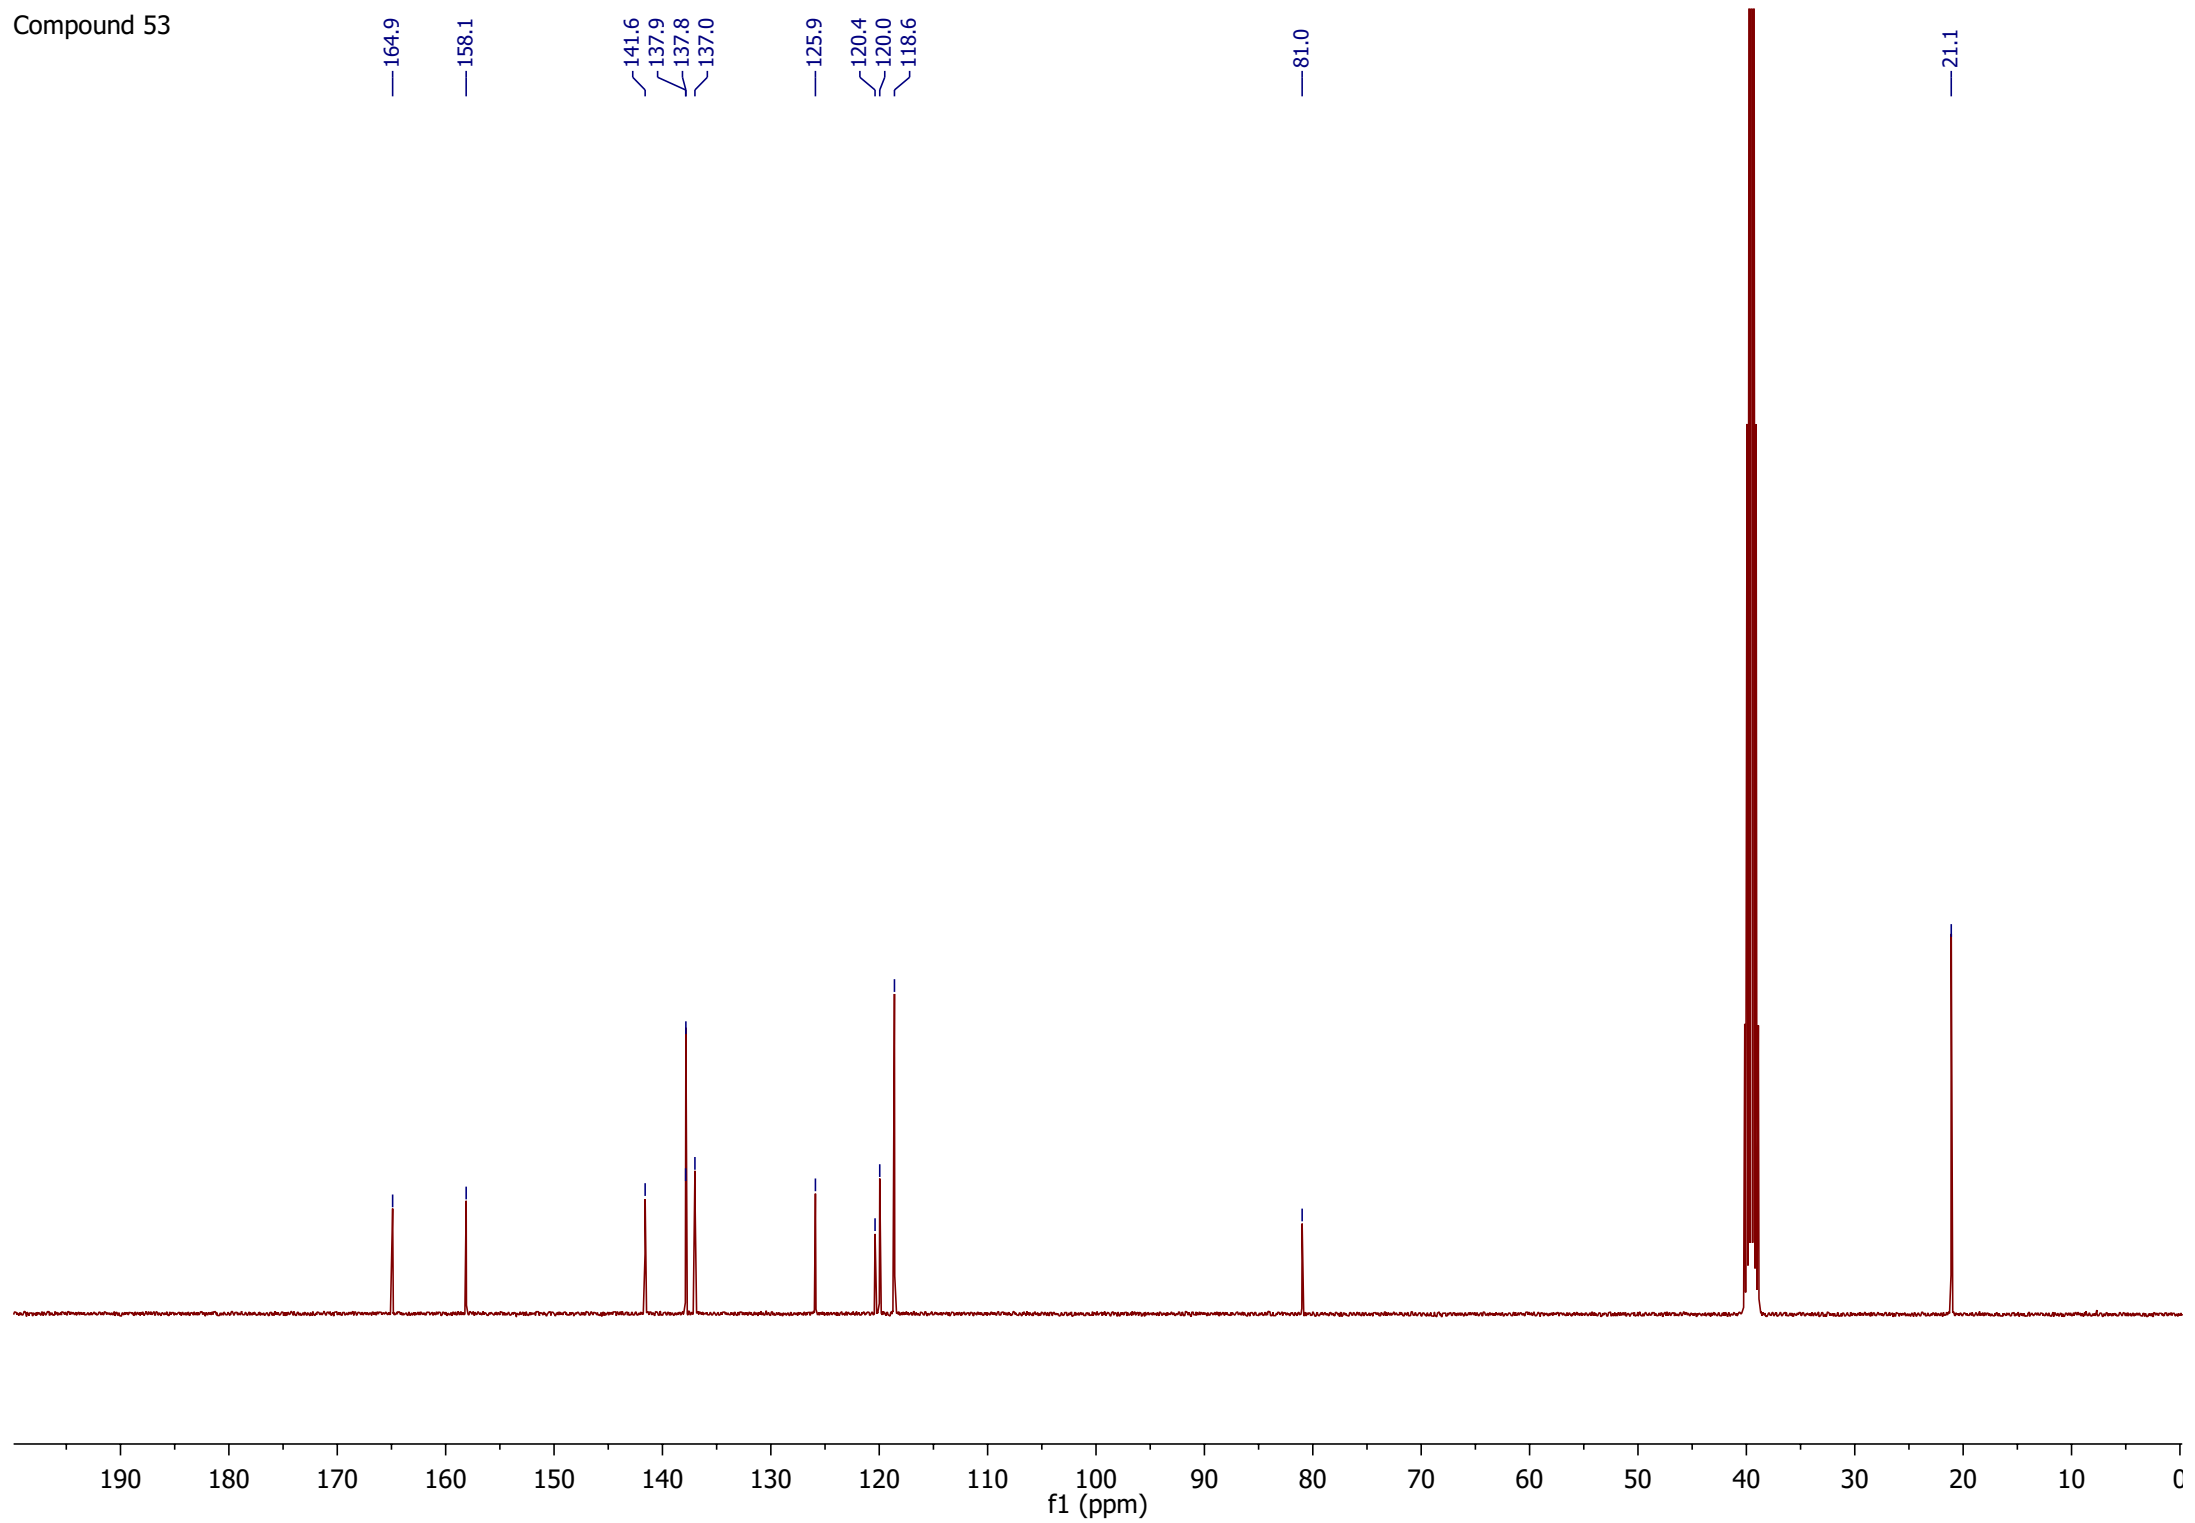

Compound 54

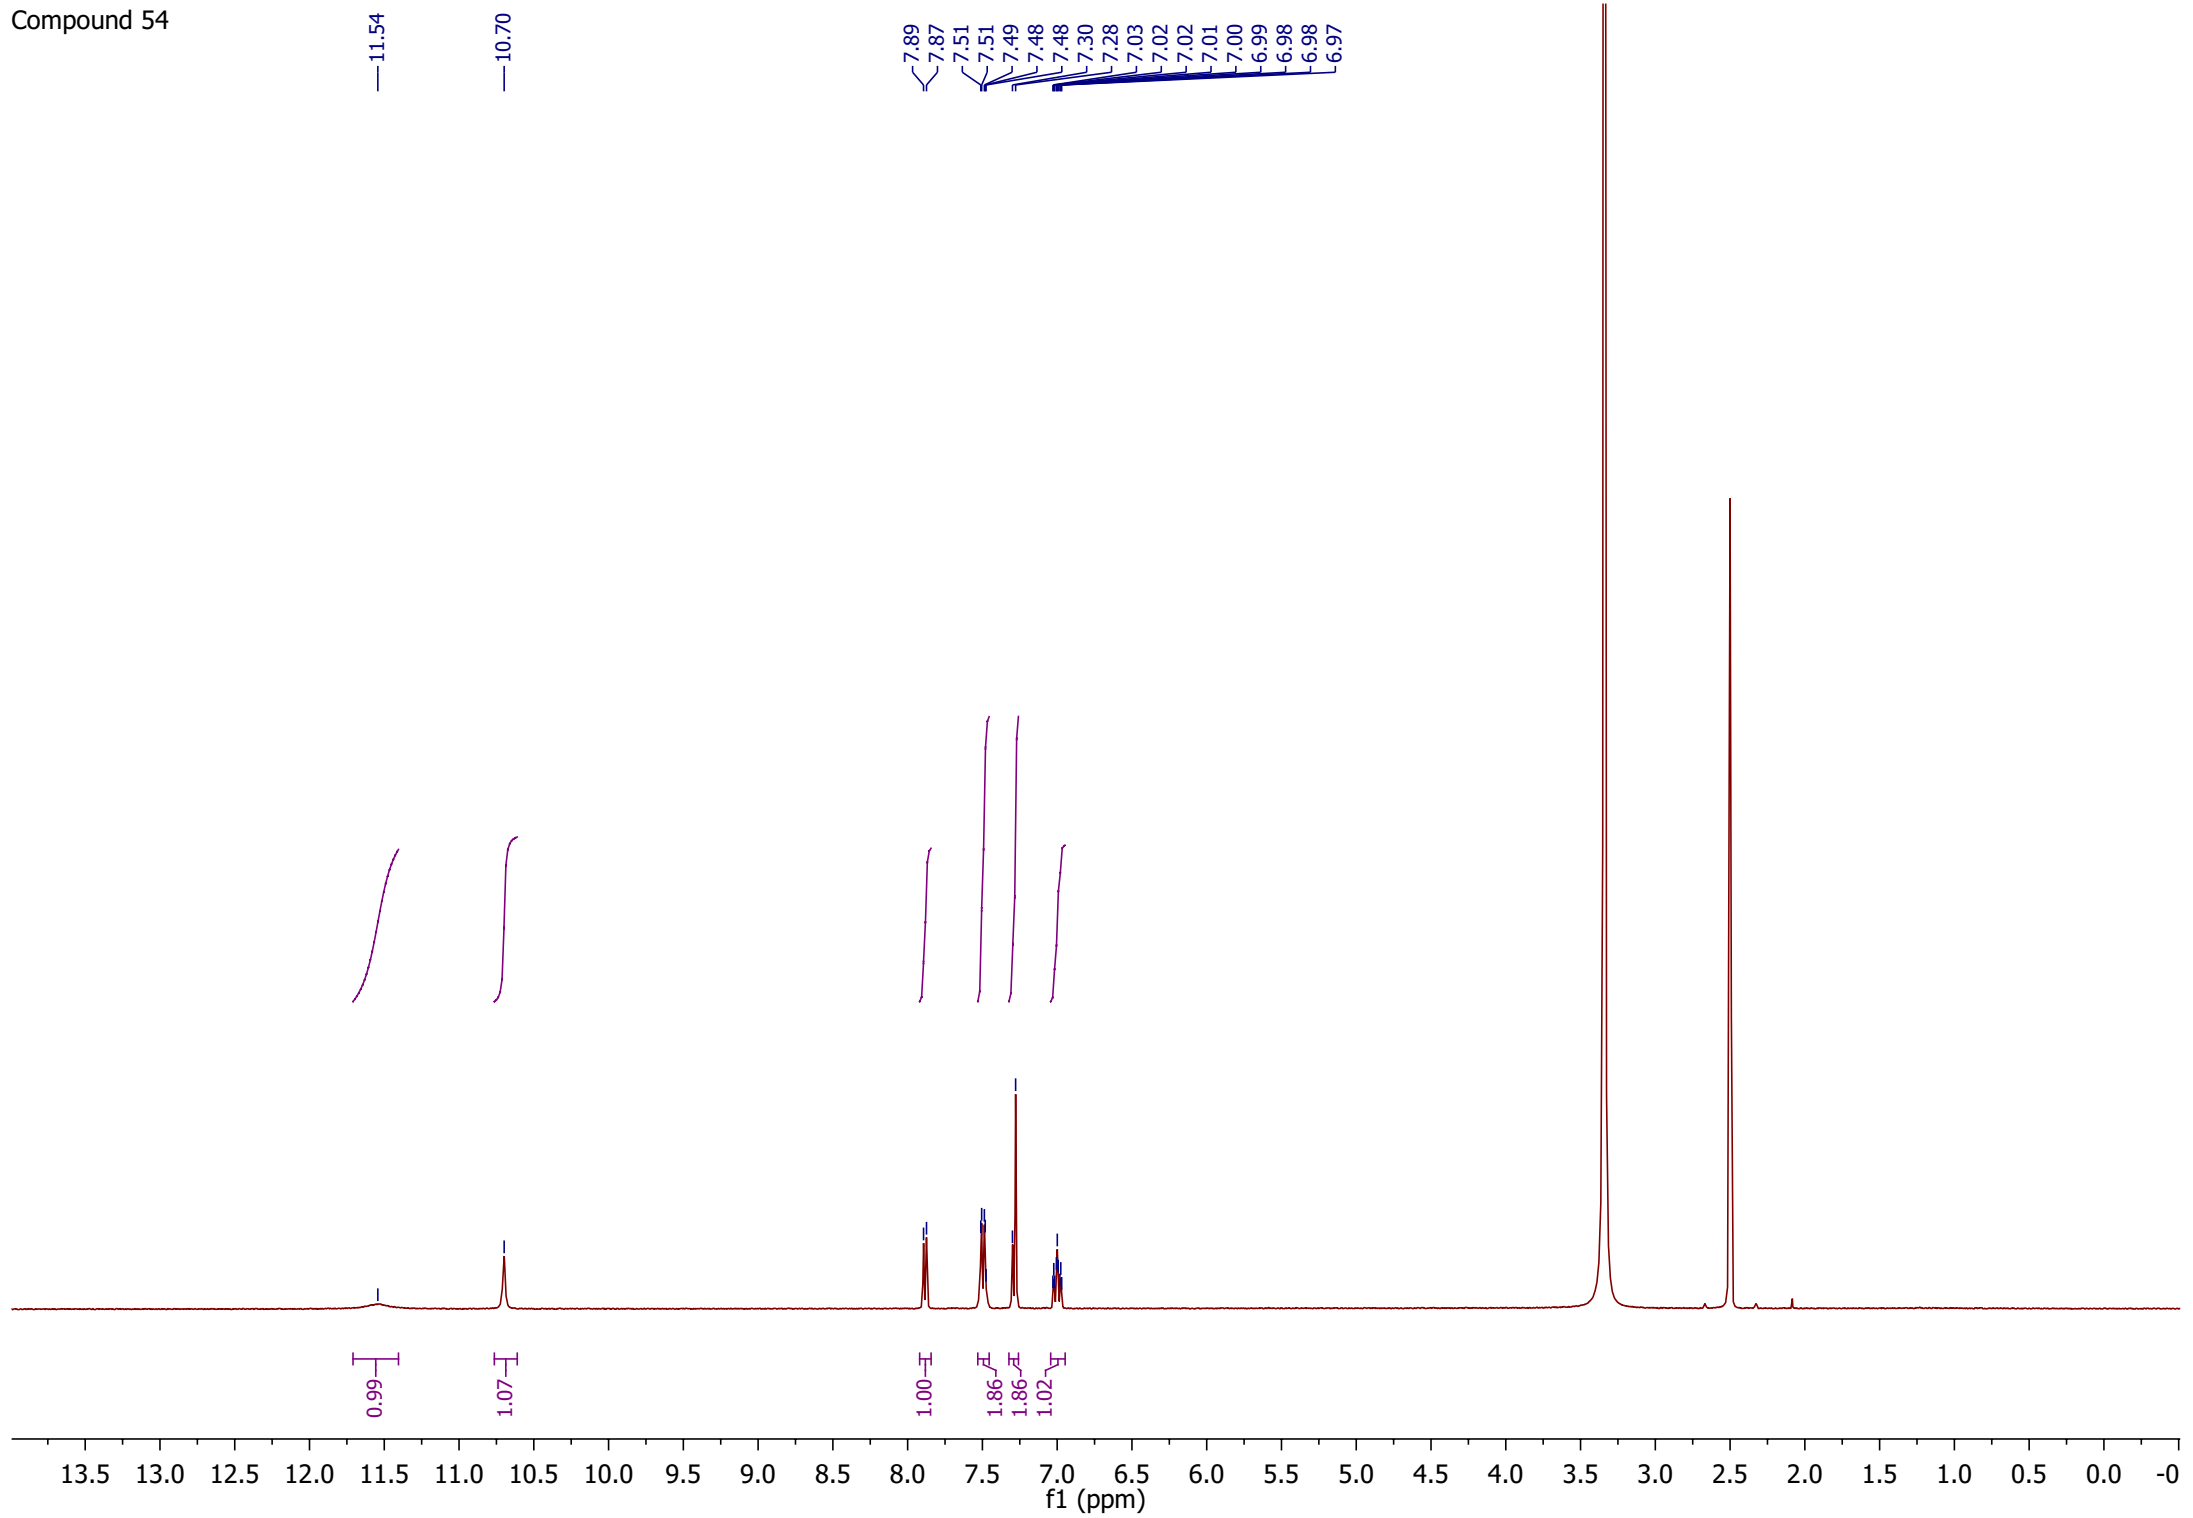

Compound 54

164.9  
163.7  
163.6  
161.3  
161.2  
156.5  
141.1  
141.0  
140.9  
133.0  
132.7  
132.4  
132.1  
130.8  
127.7  
124.9  
124.5  
122.2  
119.5  
115.6  
115.5  
115.5  
115.4  
113.3  
113.3  
113.3  
113.2  
103.2  
103.1  
103.0  
102.9  
99.4  
99.2  
98.9

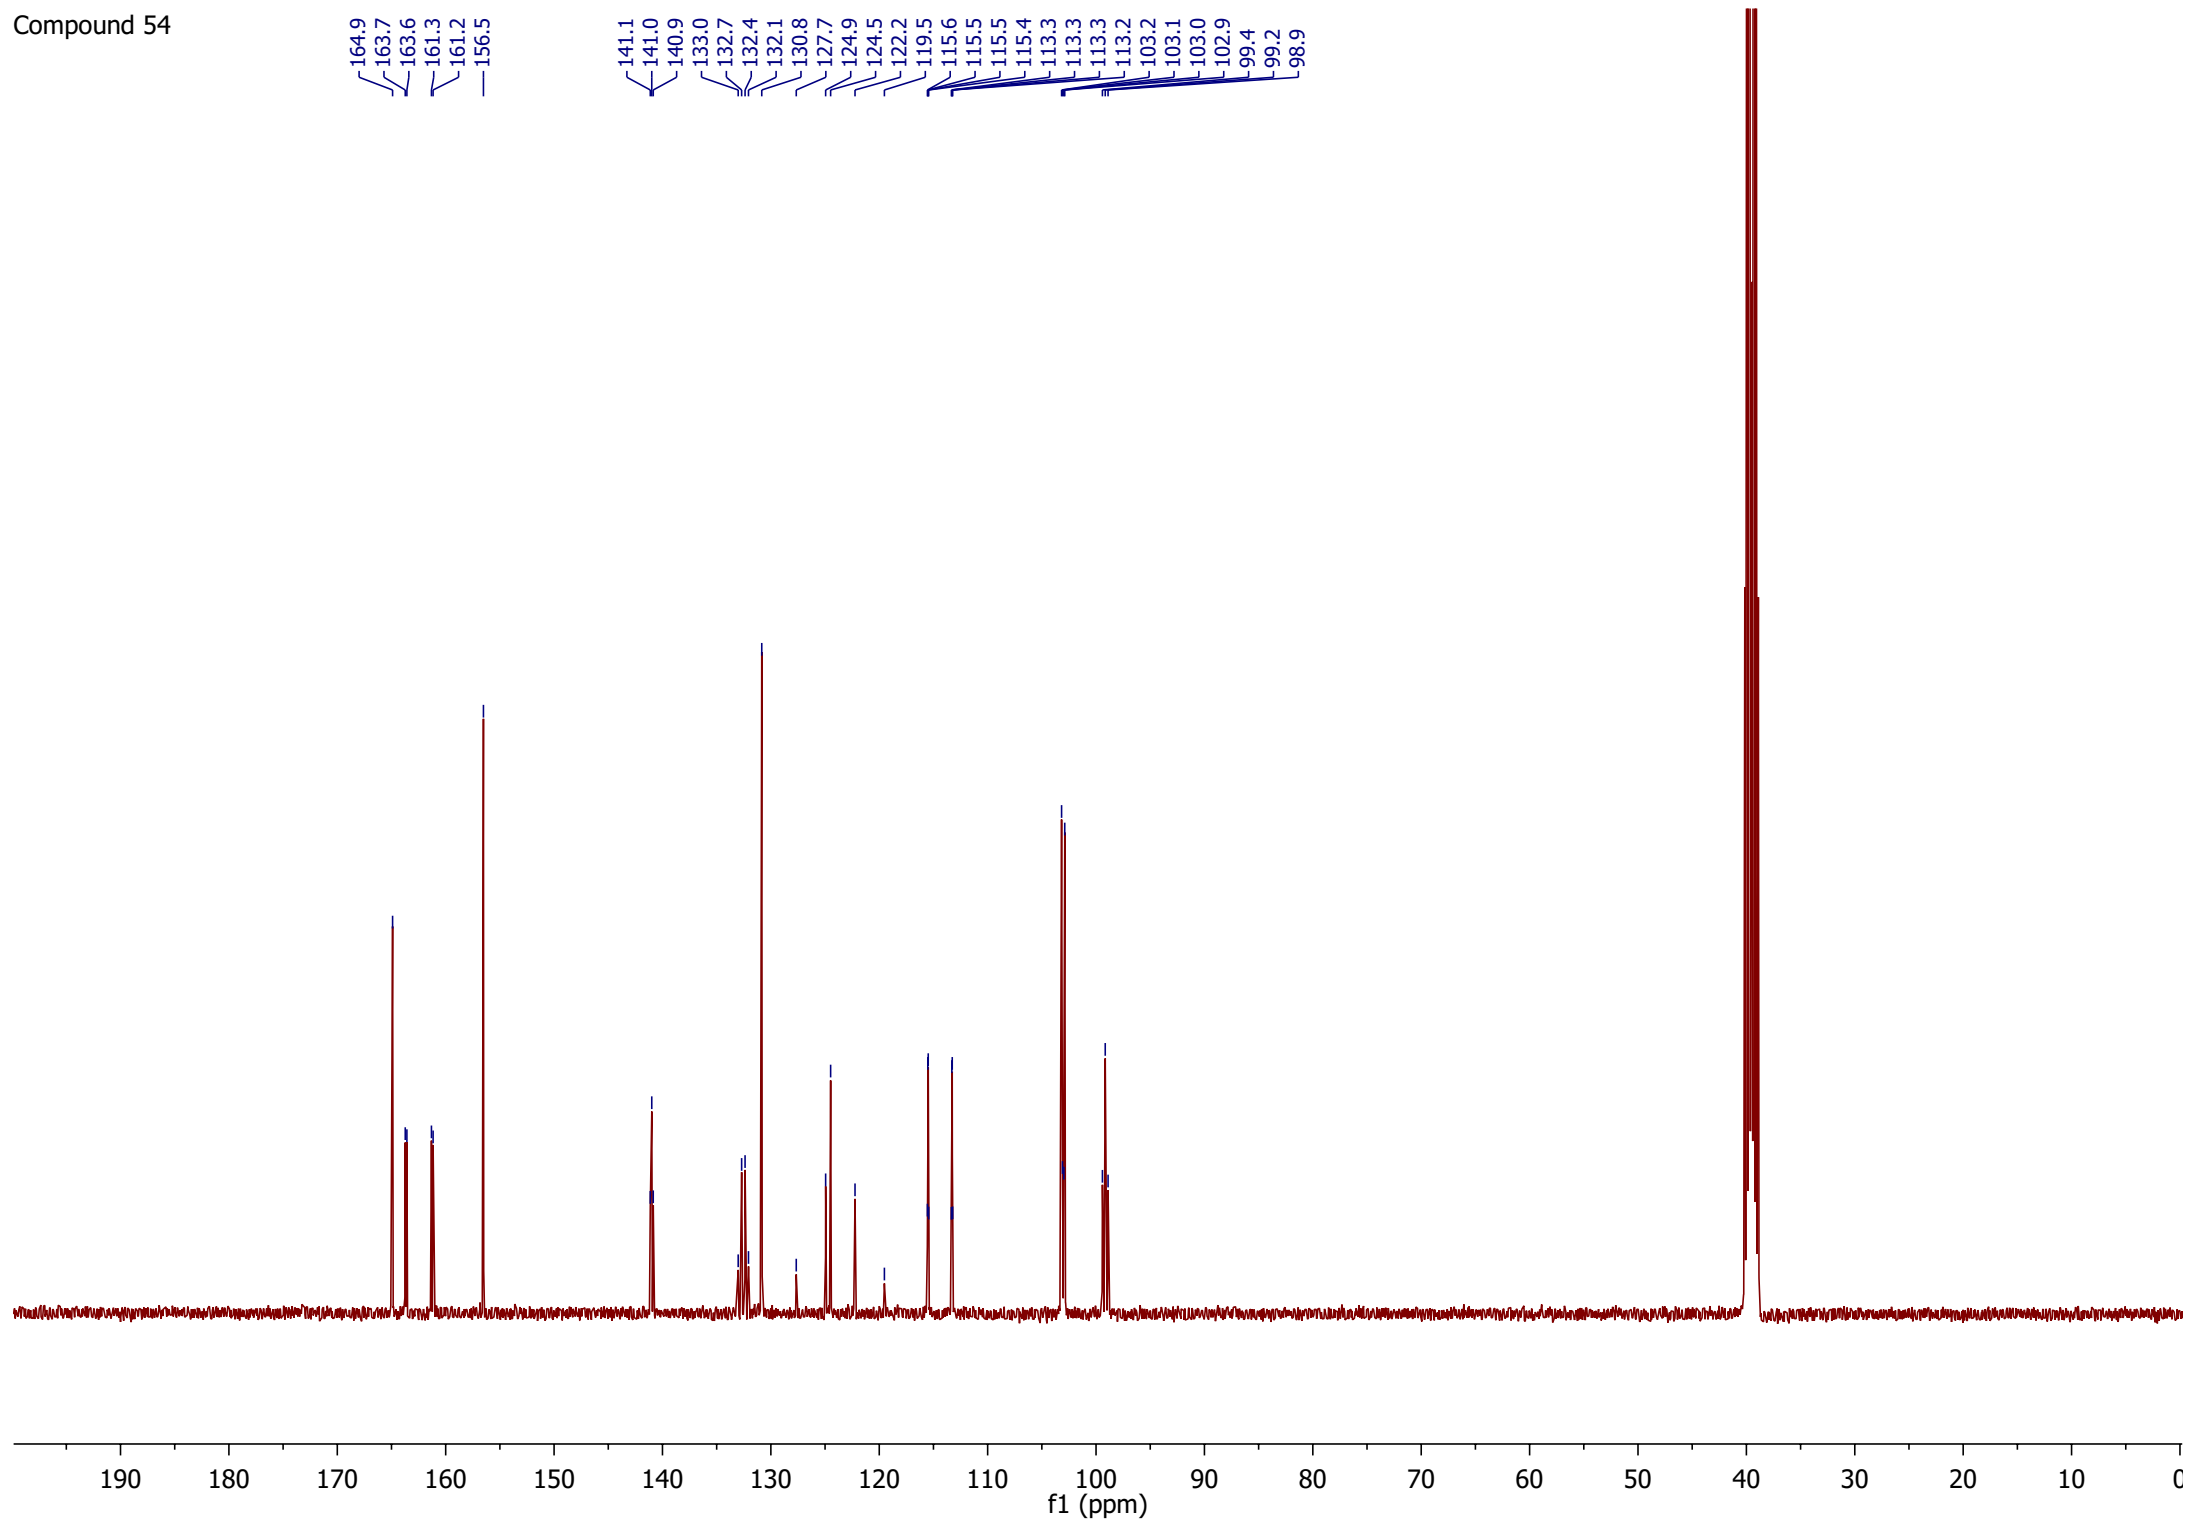

Compound 55

—11.54

—10.65

7.90  
7.88  
7.84  
7.83  
7.37  
7.37  
7.36  
7.30  
7.28

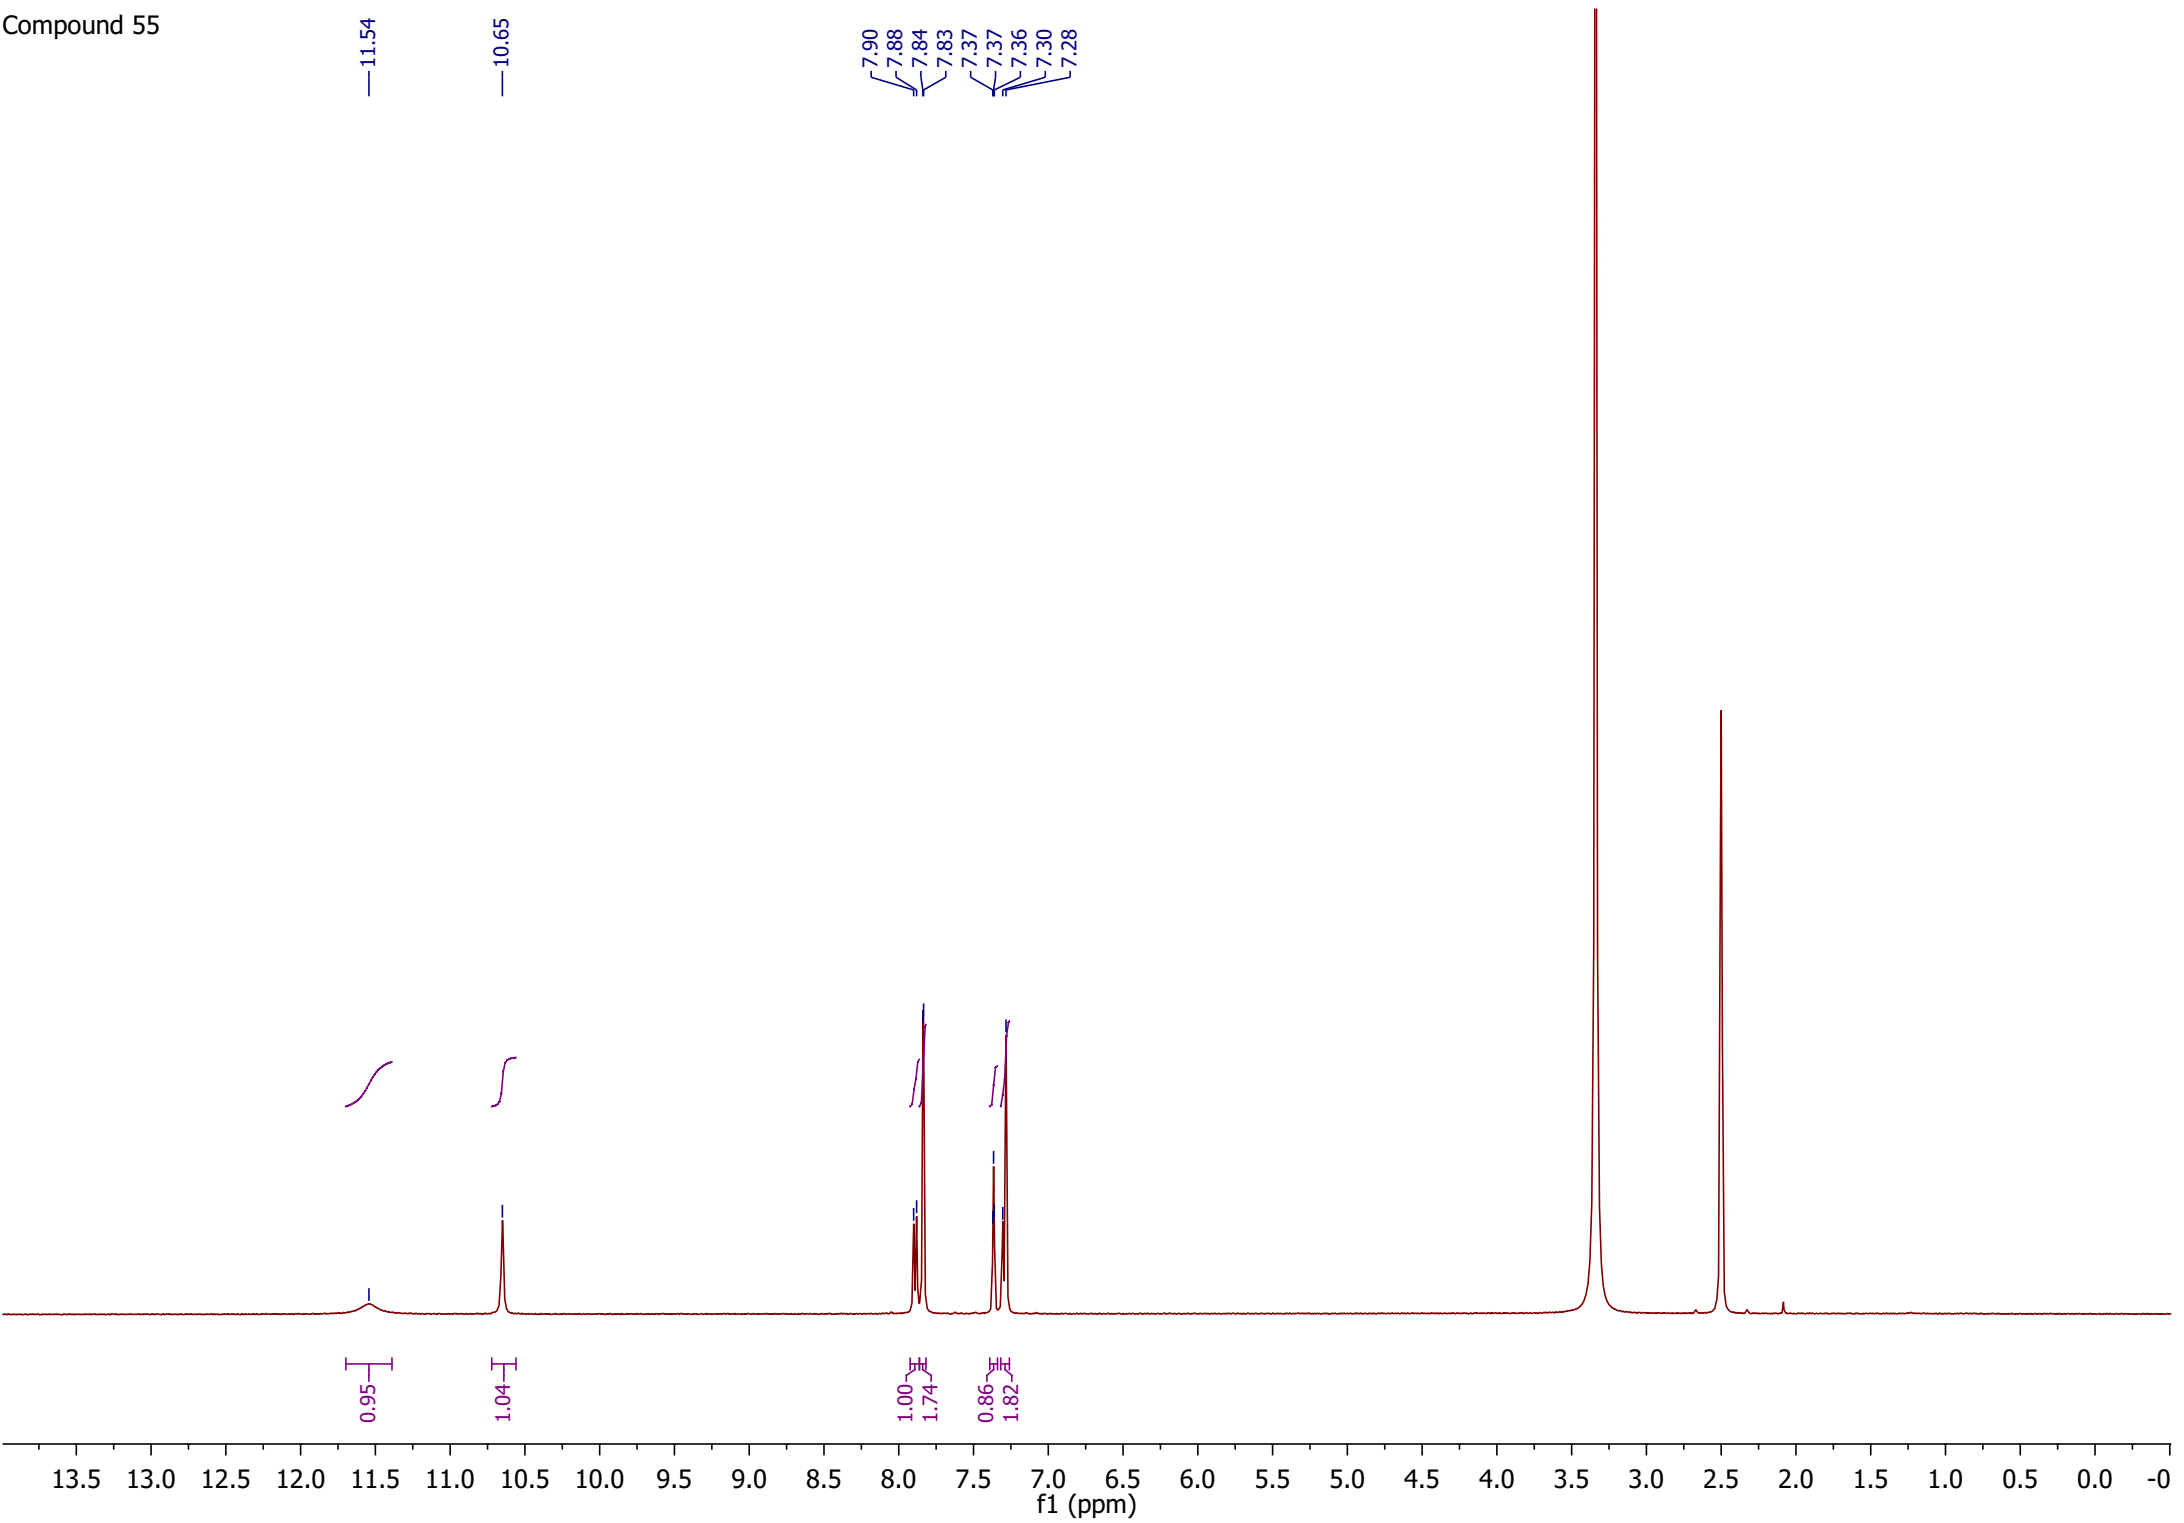

Compound 55

— 165.0  
— 156.6  
— 140.8  
— 134.1  
— 133.0  
— 132.7  
— 132.4  
— 132.1  
— 130.8  
— 127.6  
— 124.9  
— 124.3  
— 123.3  
— 122.2  
— 119.5  
— 118.3  
— 115.6  
— 115.5  
— 115.5  
— 115.4  
— 113.3  
— 113.3  
— 113.2

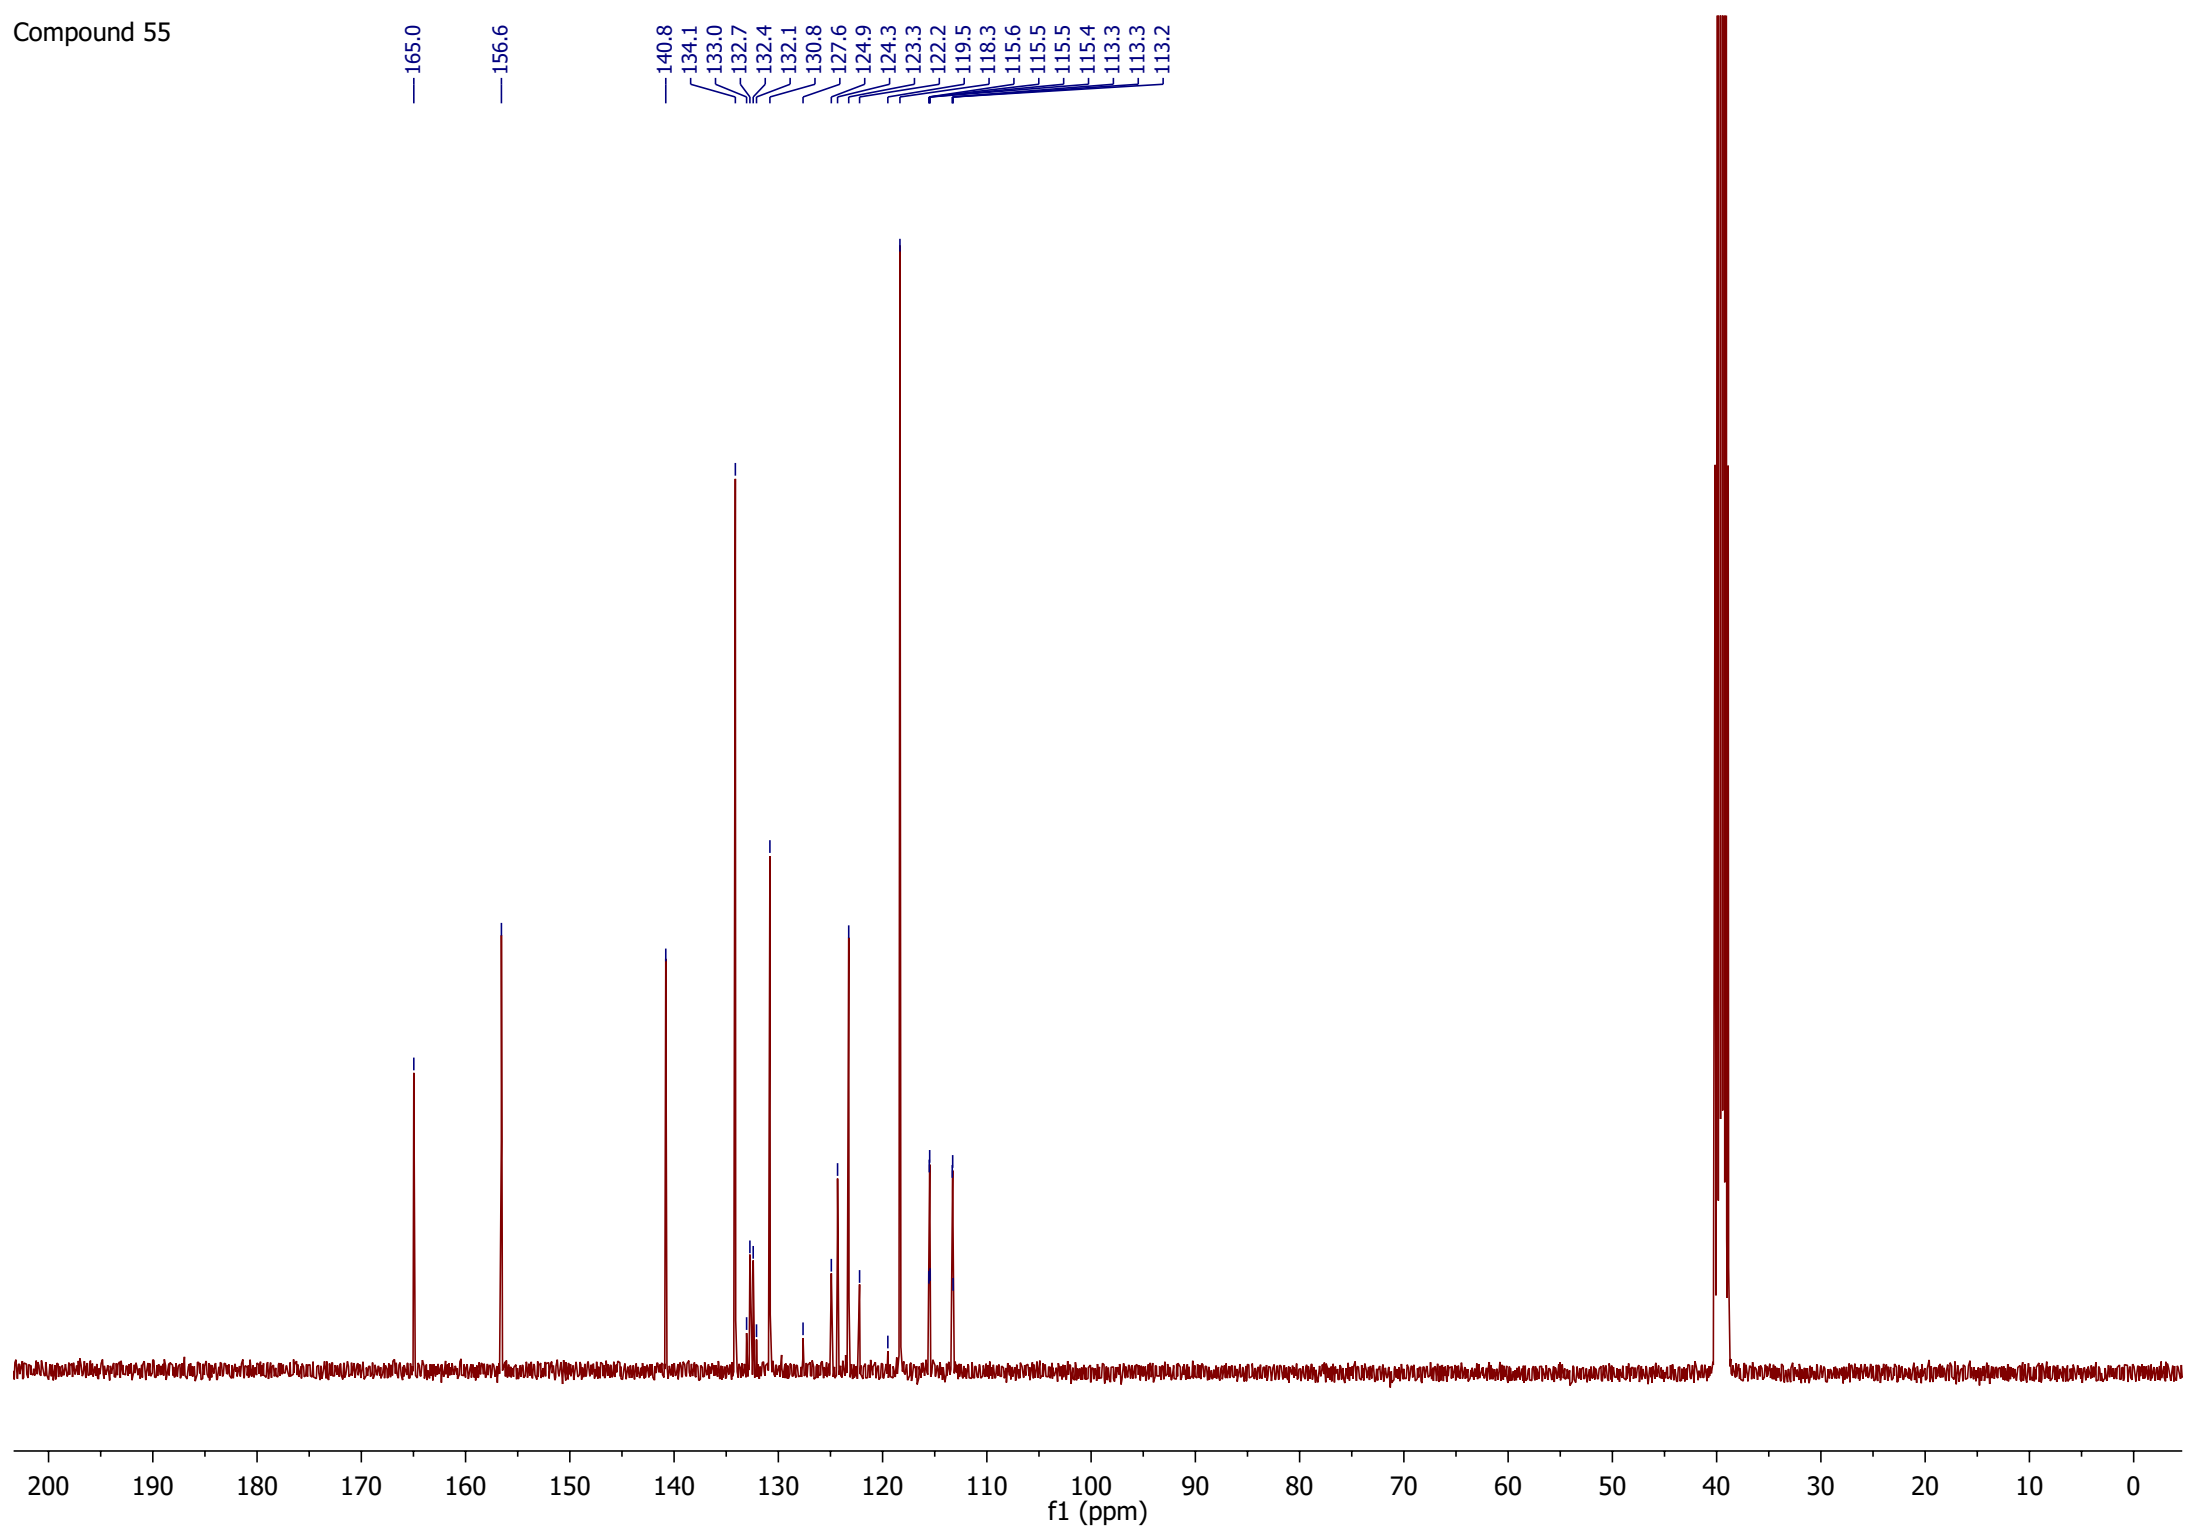

Compound 56

— 11.53

— 10.66

8.01  
8.00  
7.90  
7.88  
7.59  
7.59  
7.30  
7.28

0.97

0.98

2.05  
1.04  
1.00  
1.99

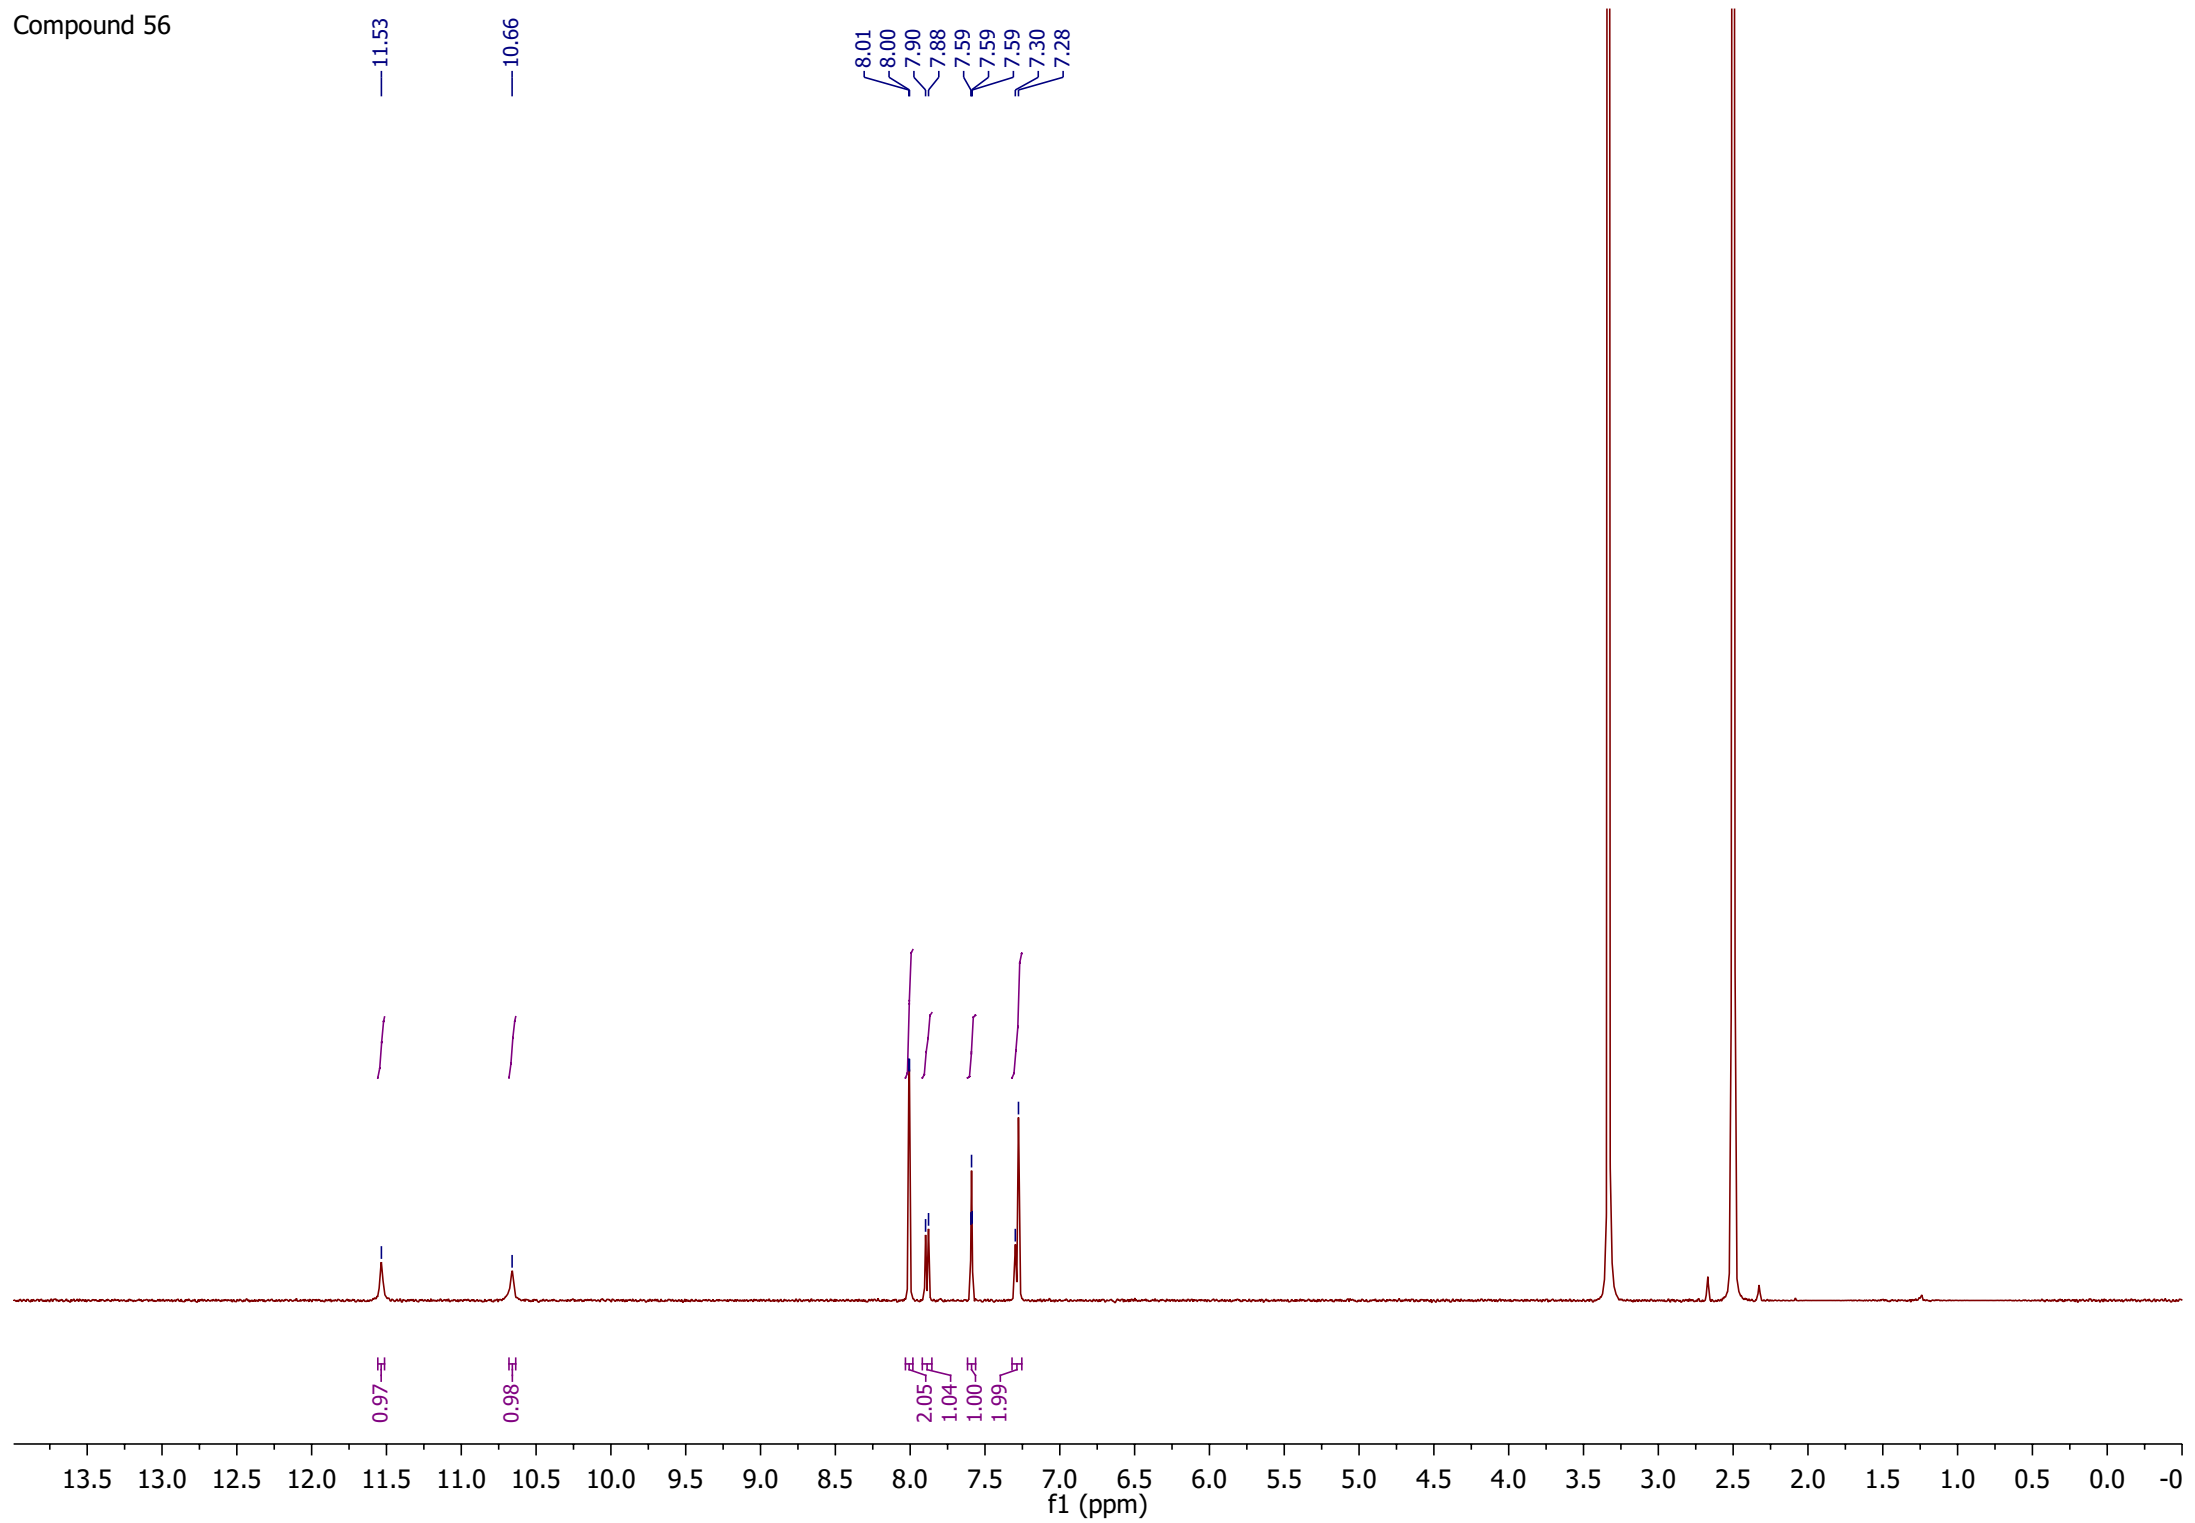



Compound 56

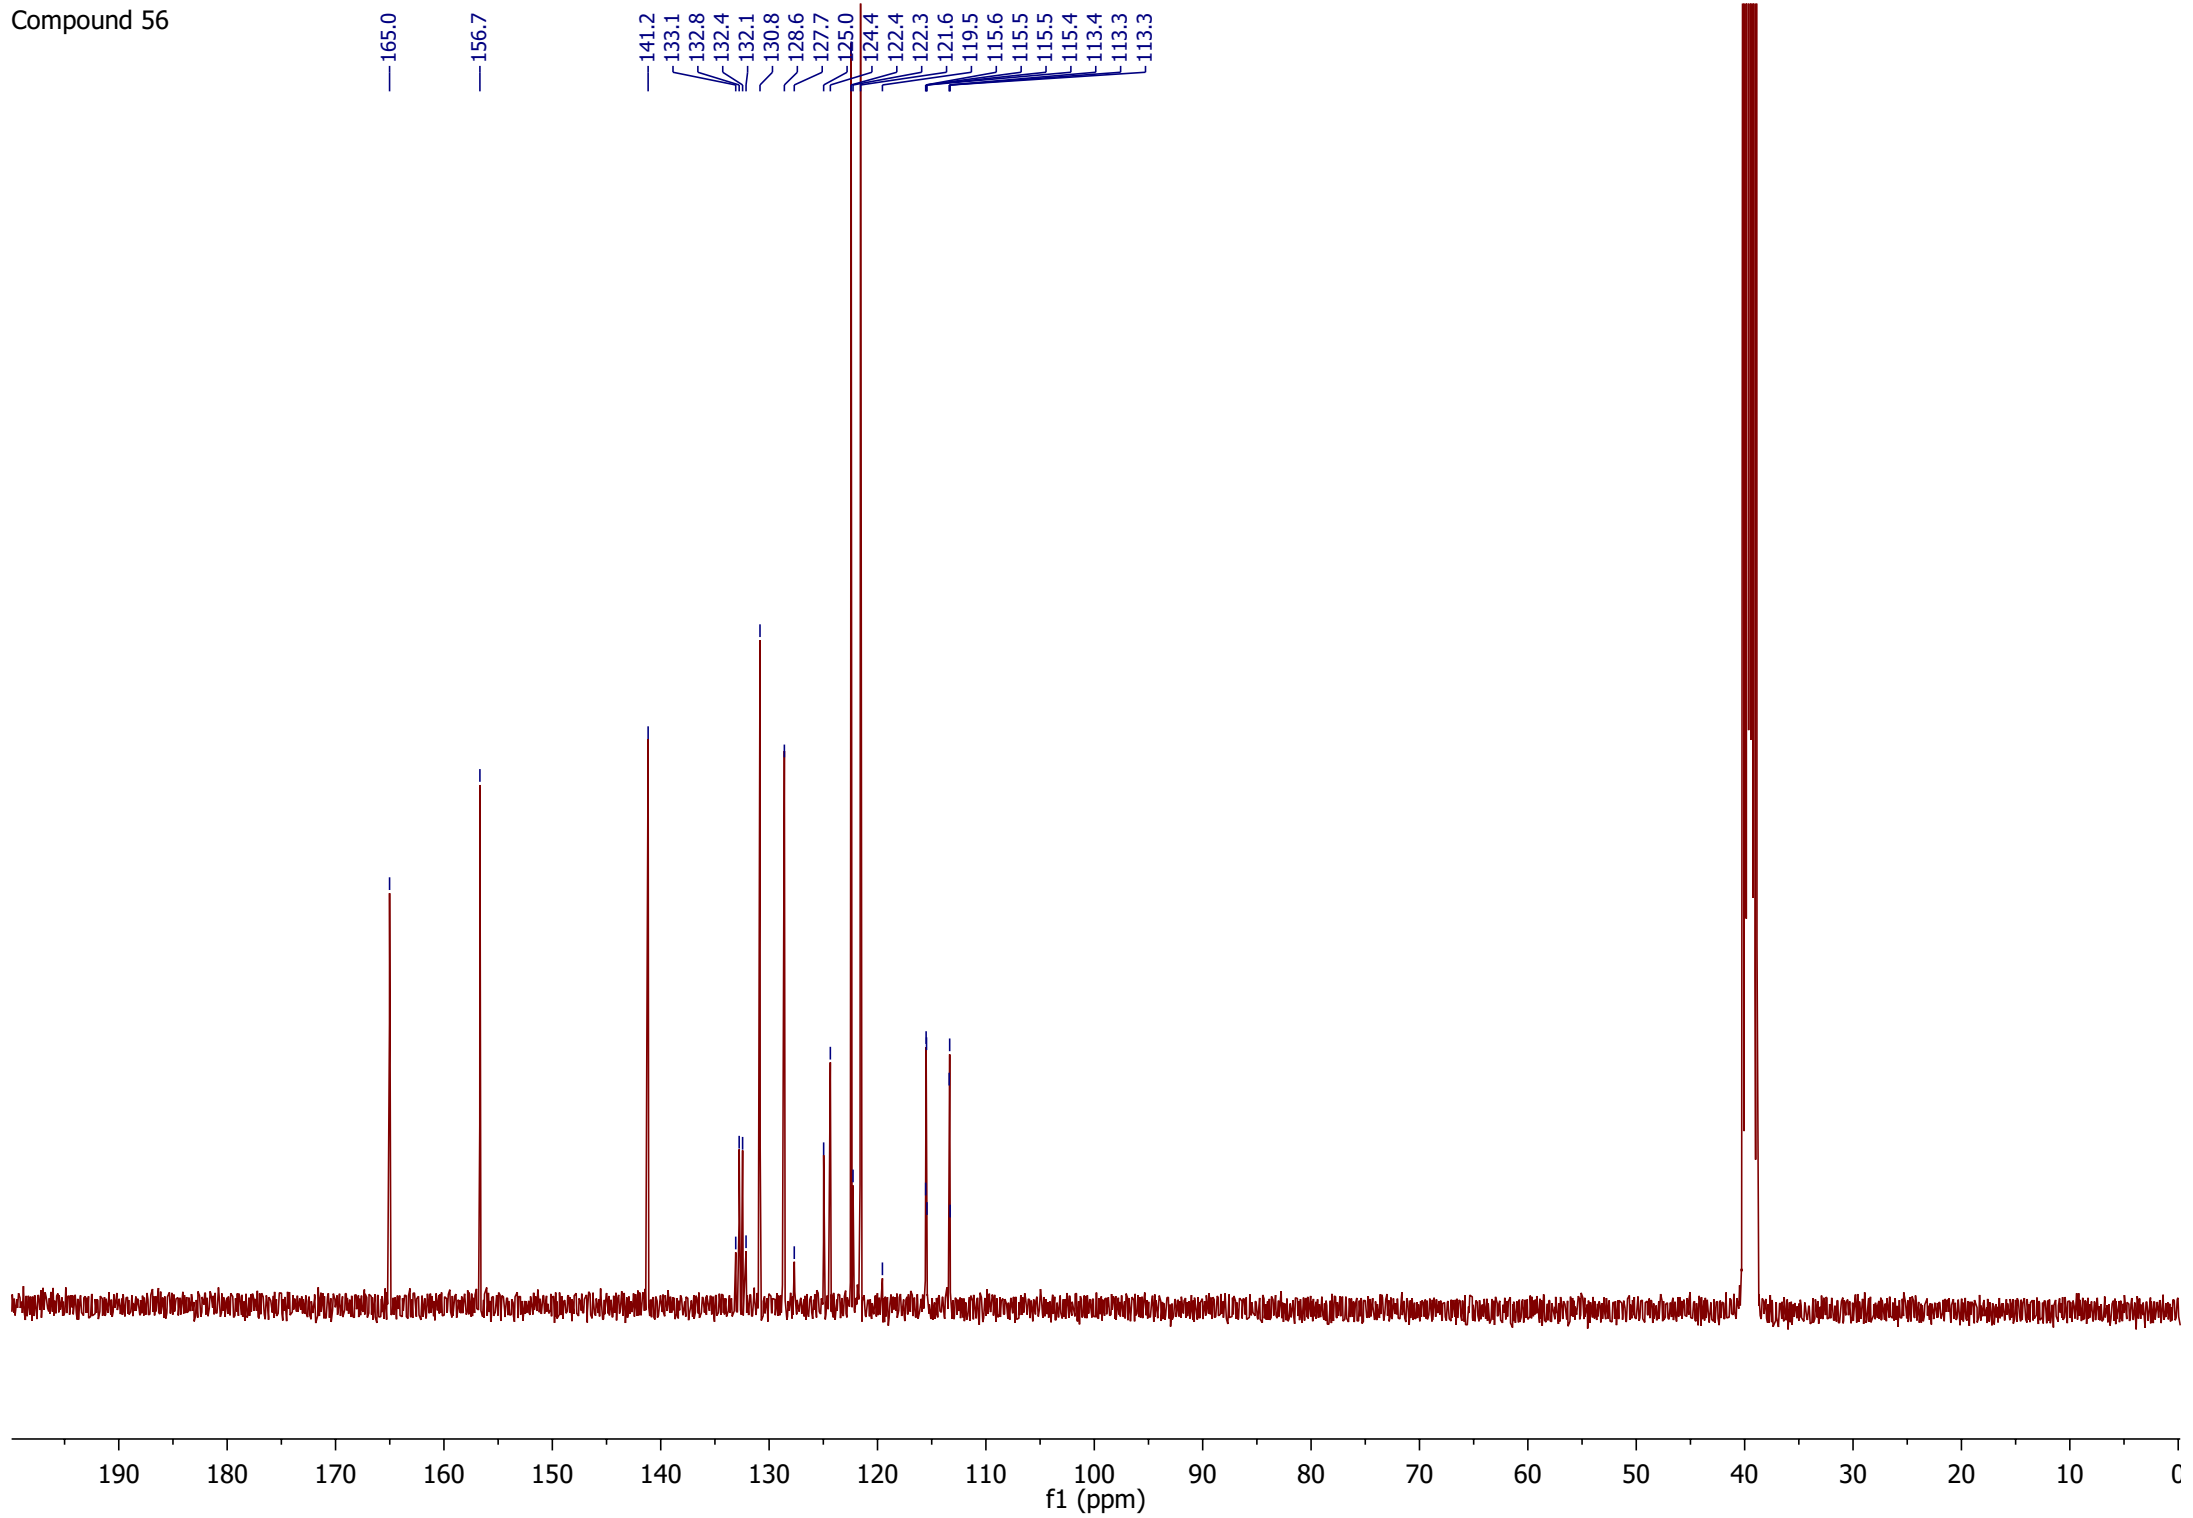

Compound 57

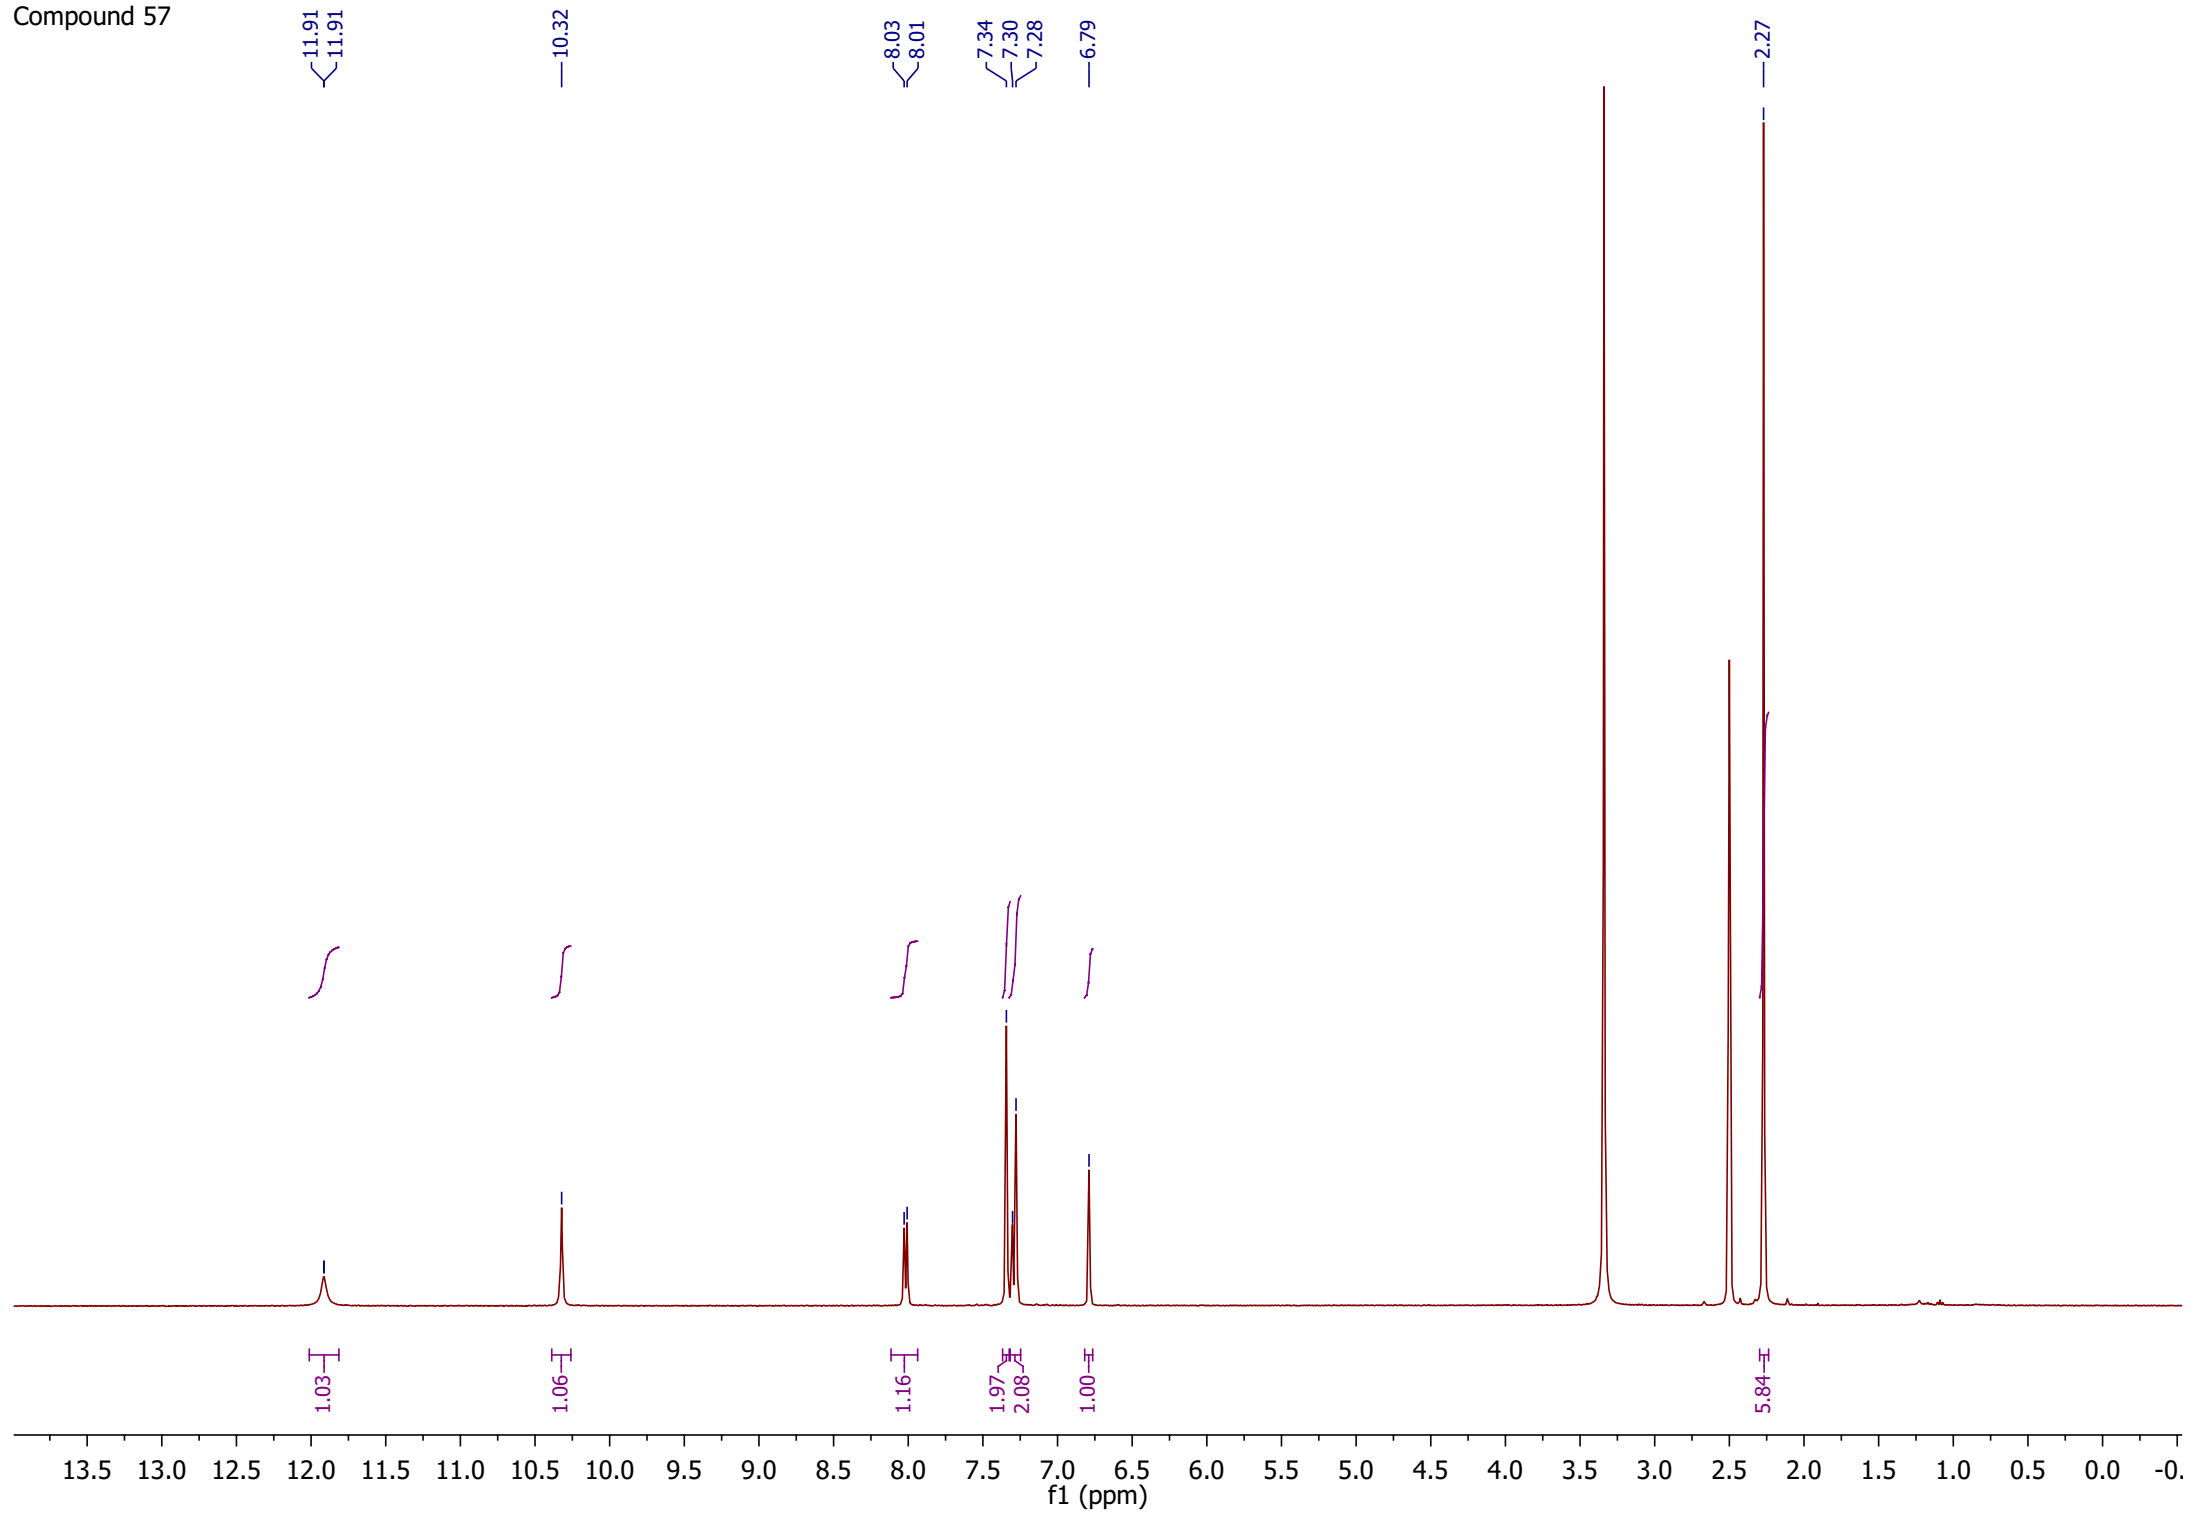

Compound 57

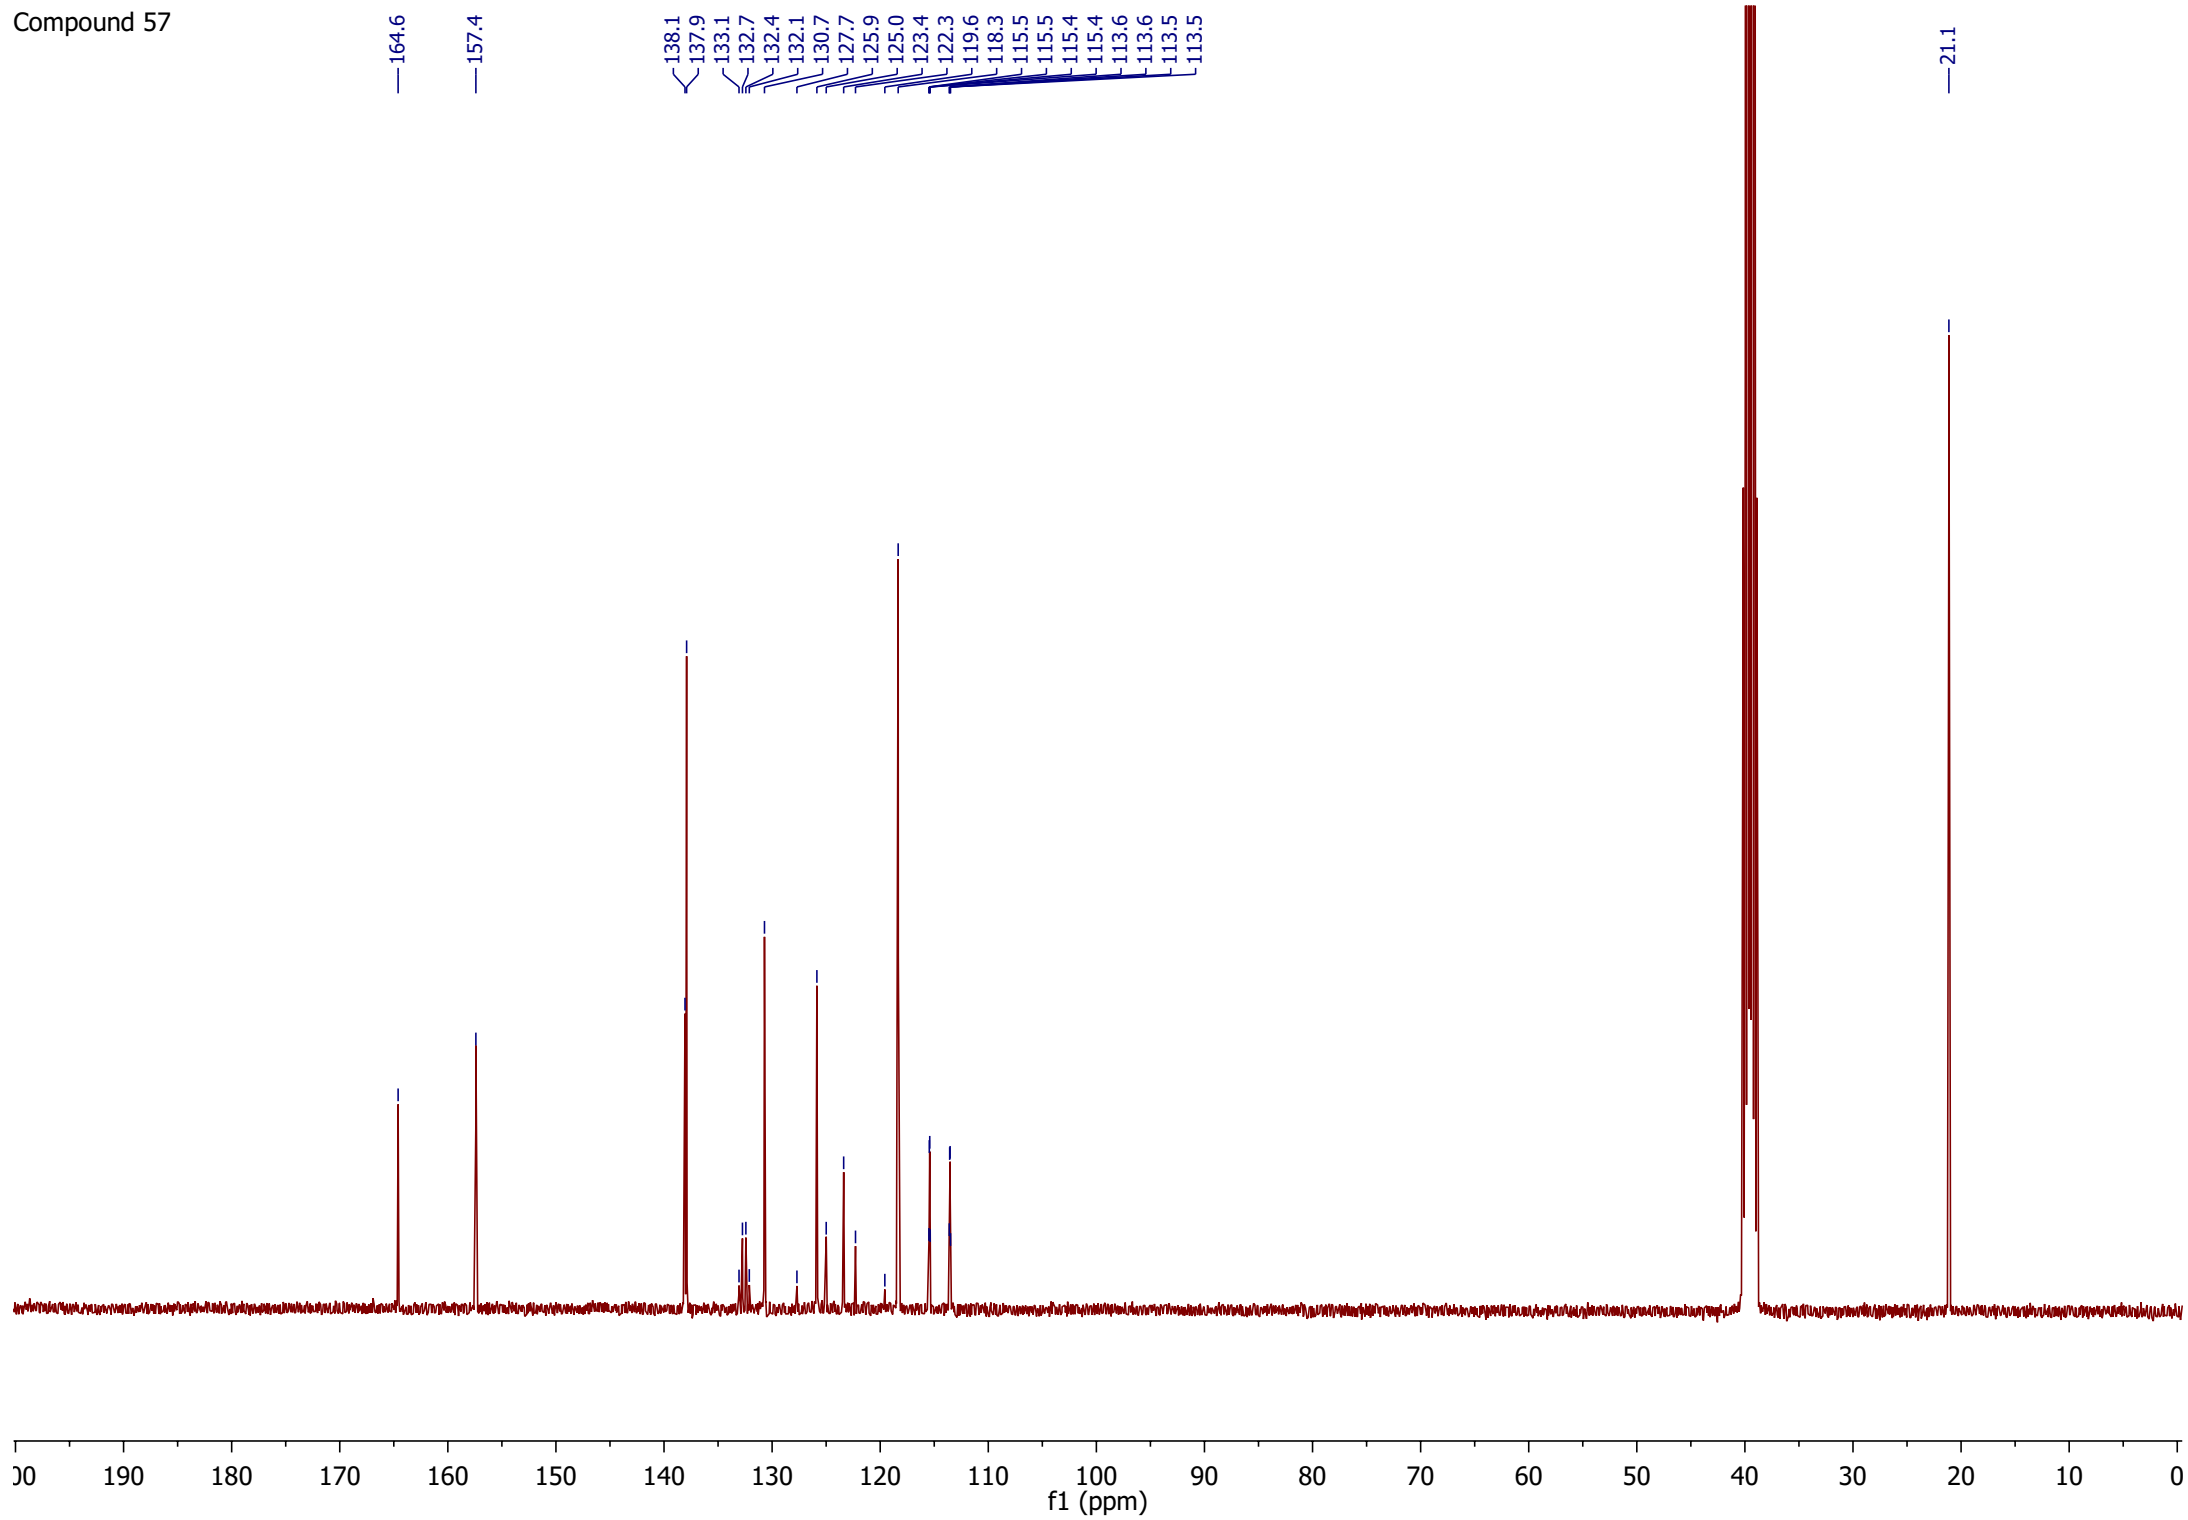

Compound 58

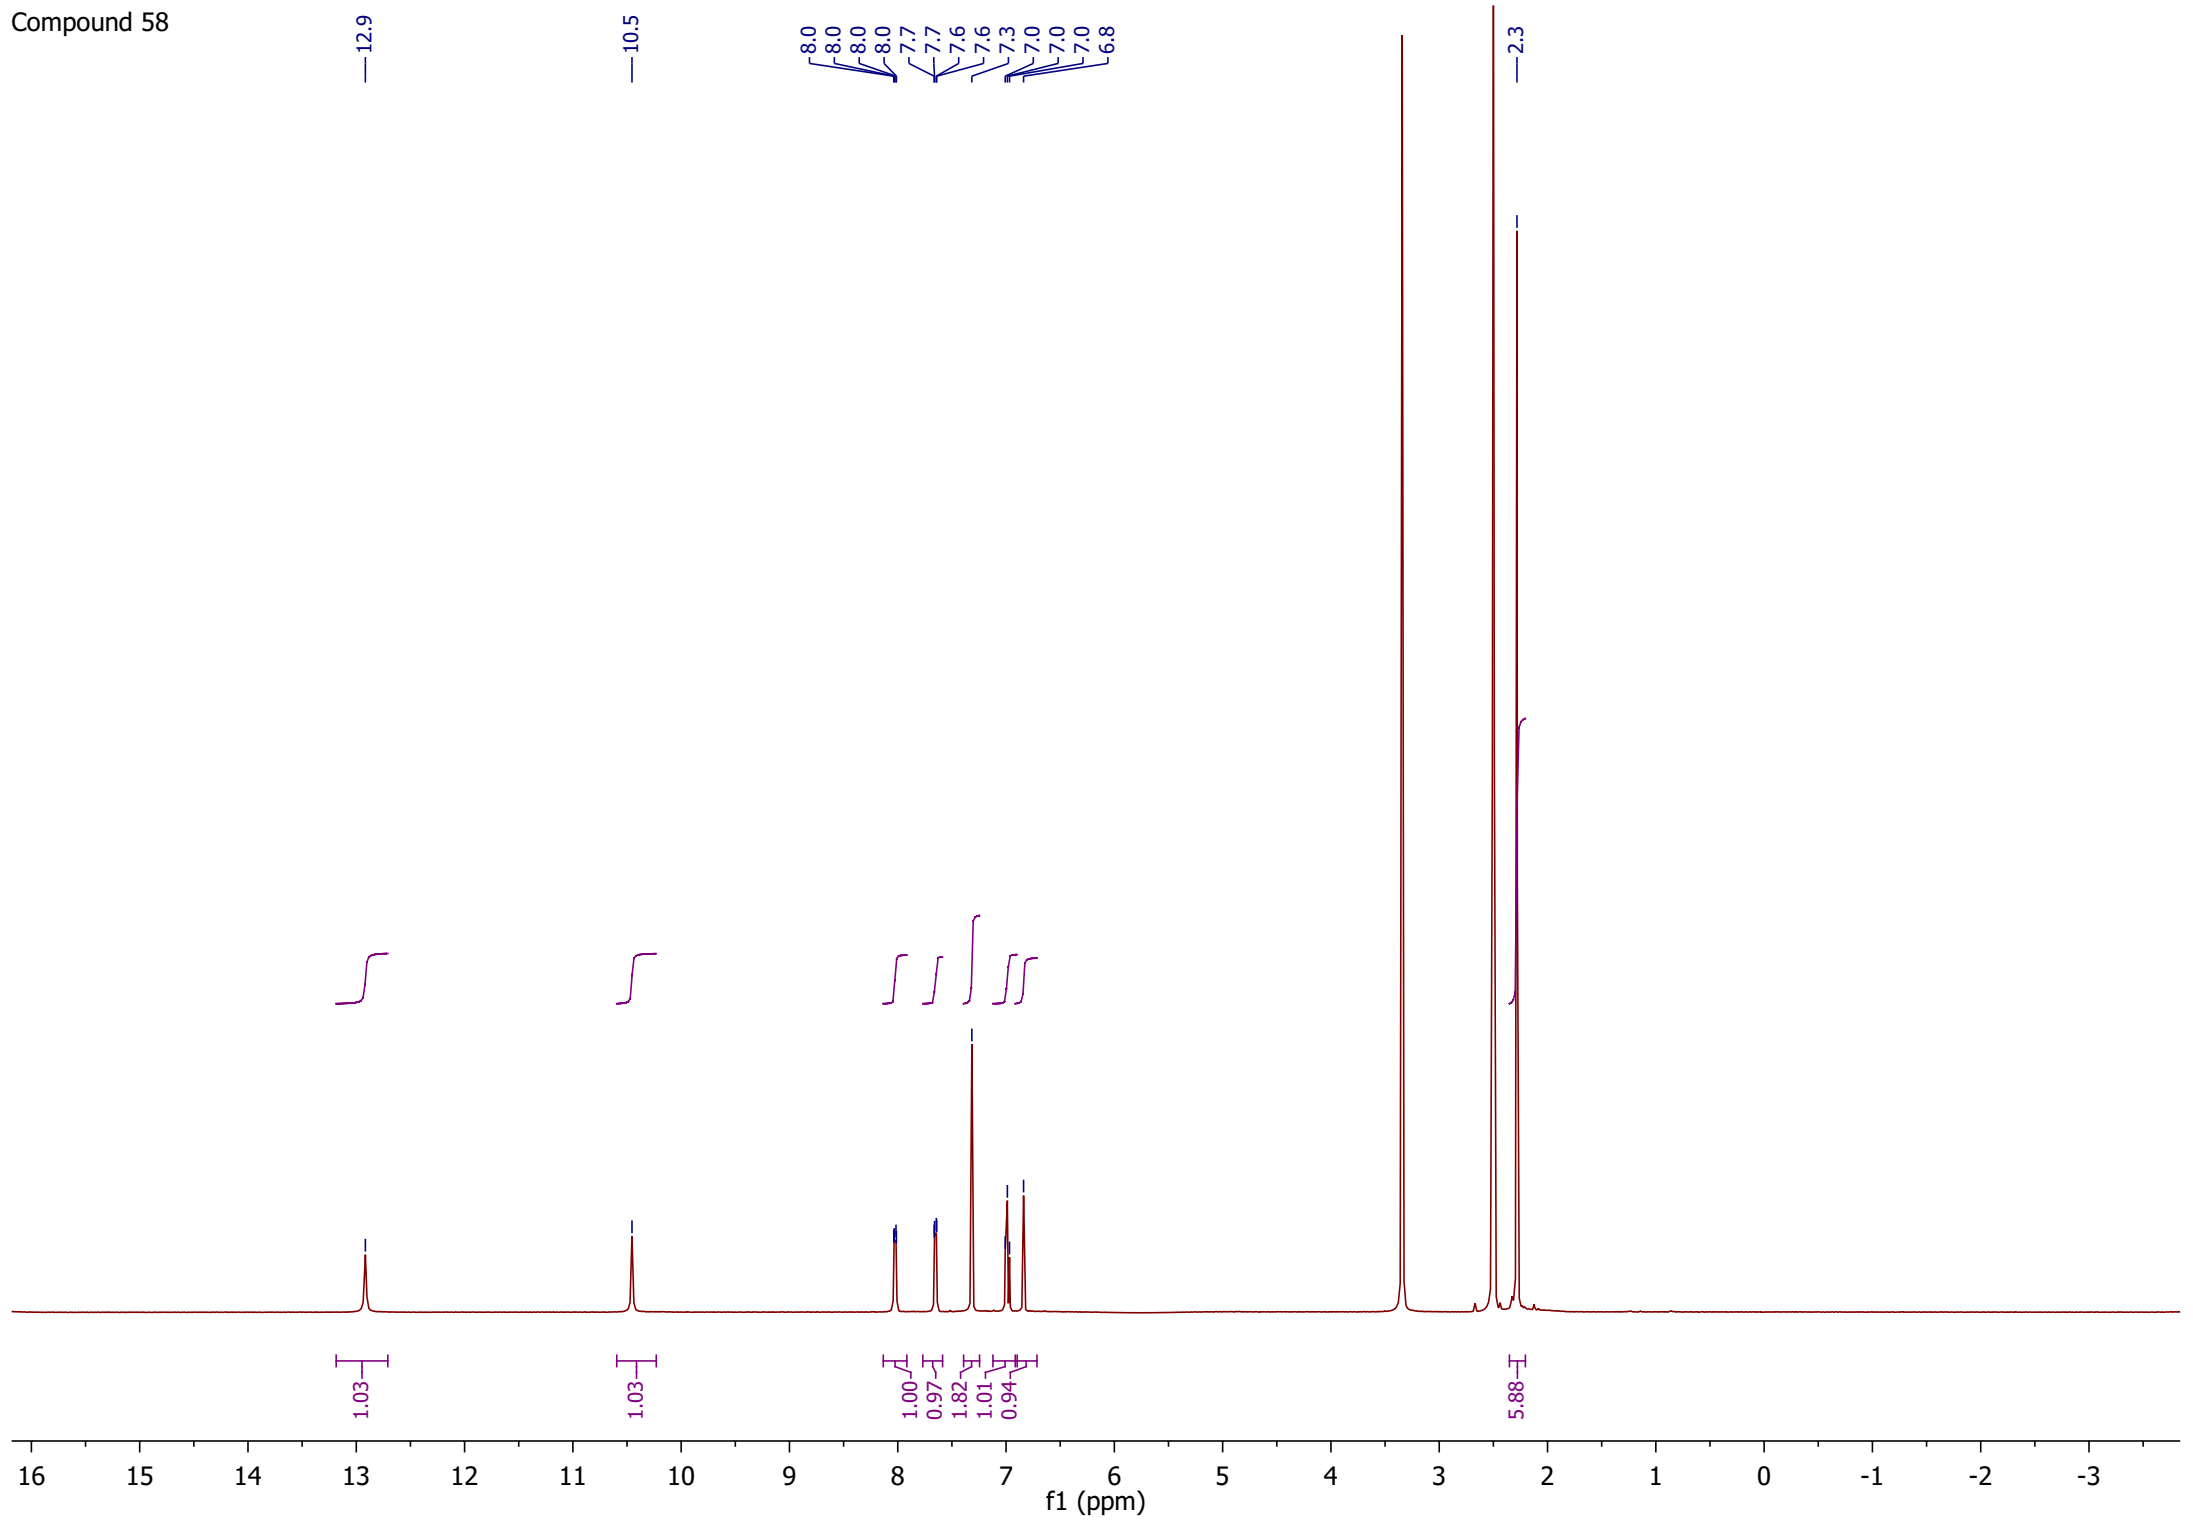

Compound 58

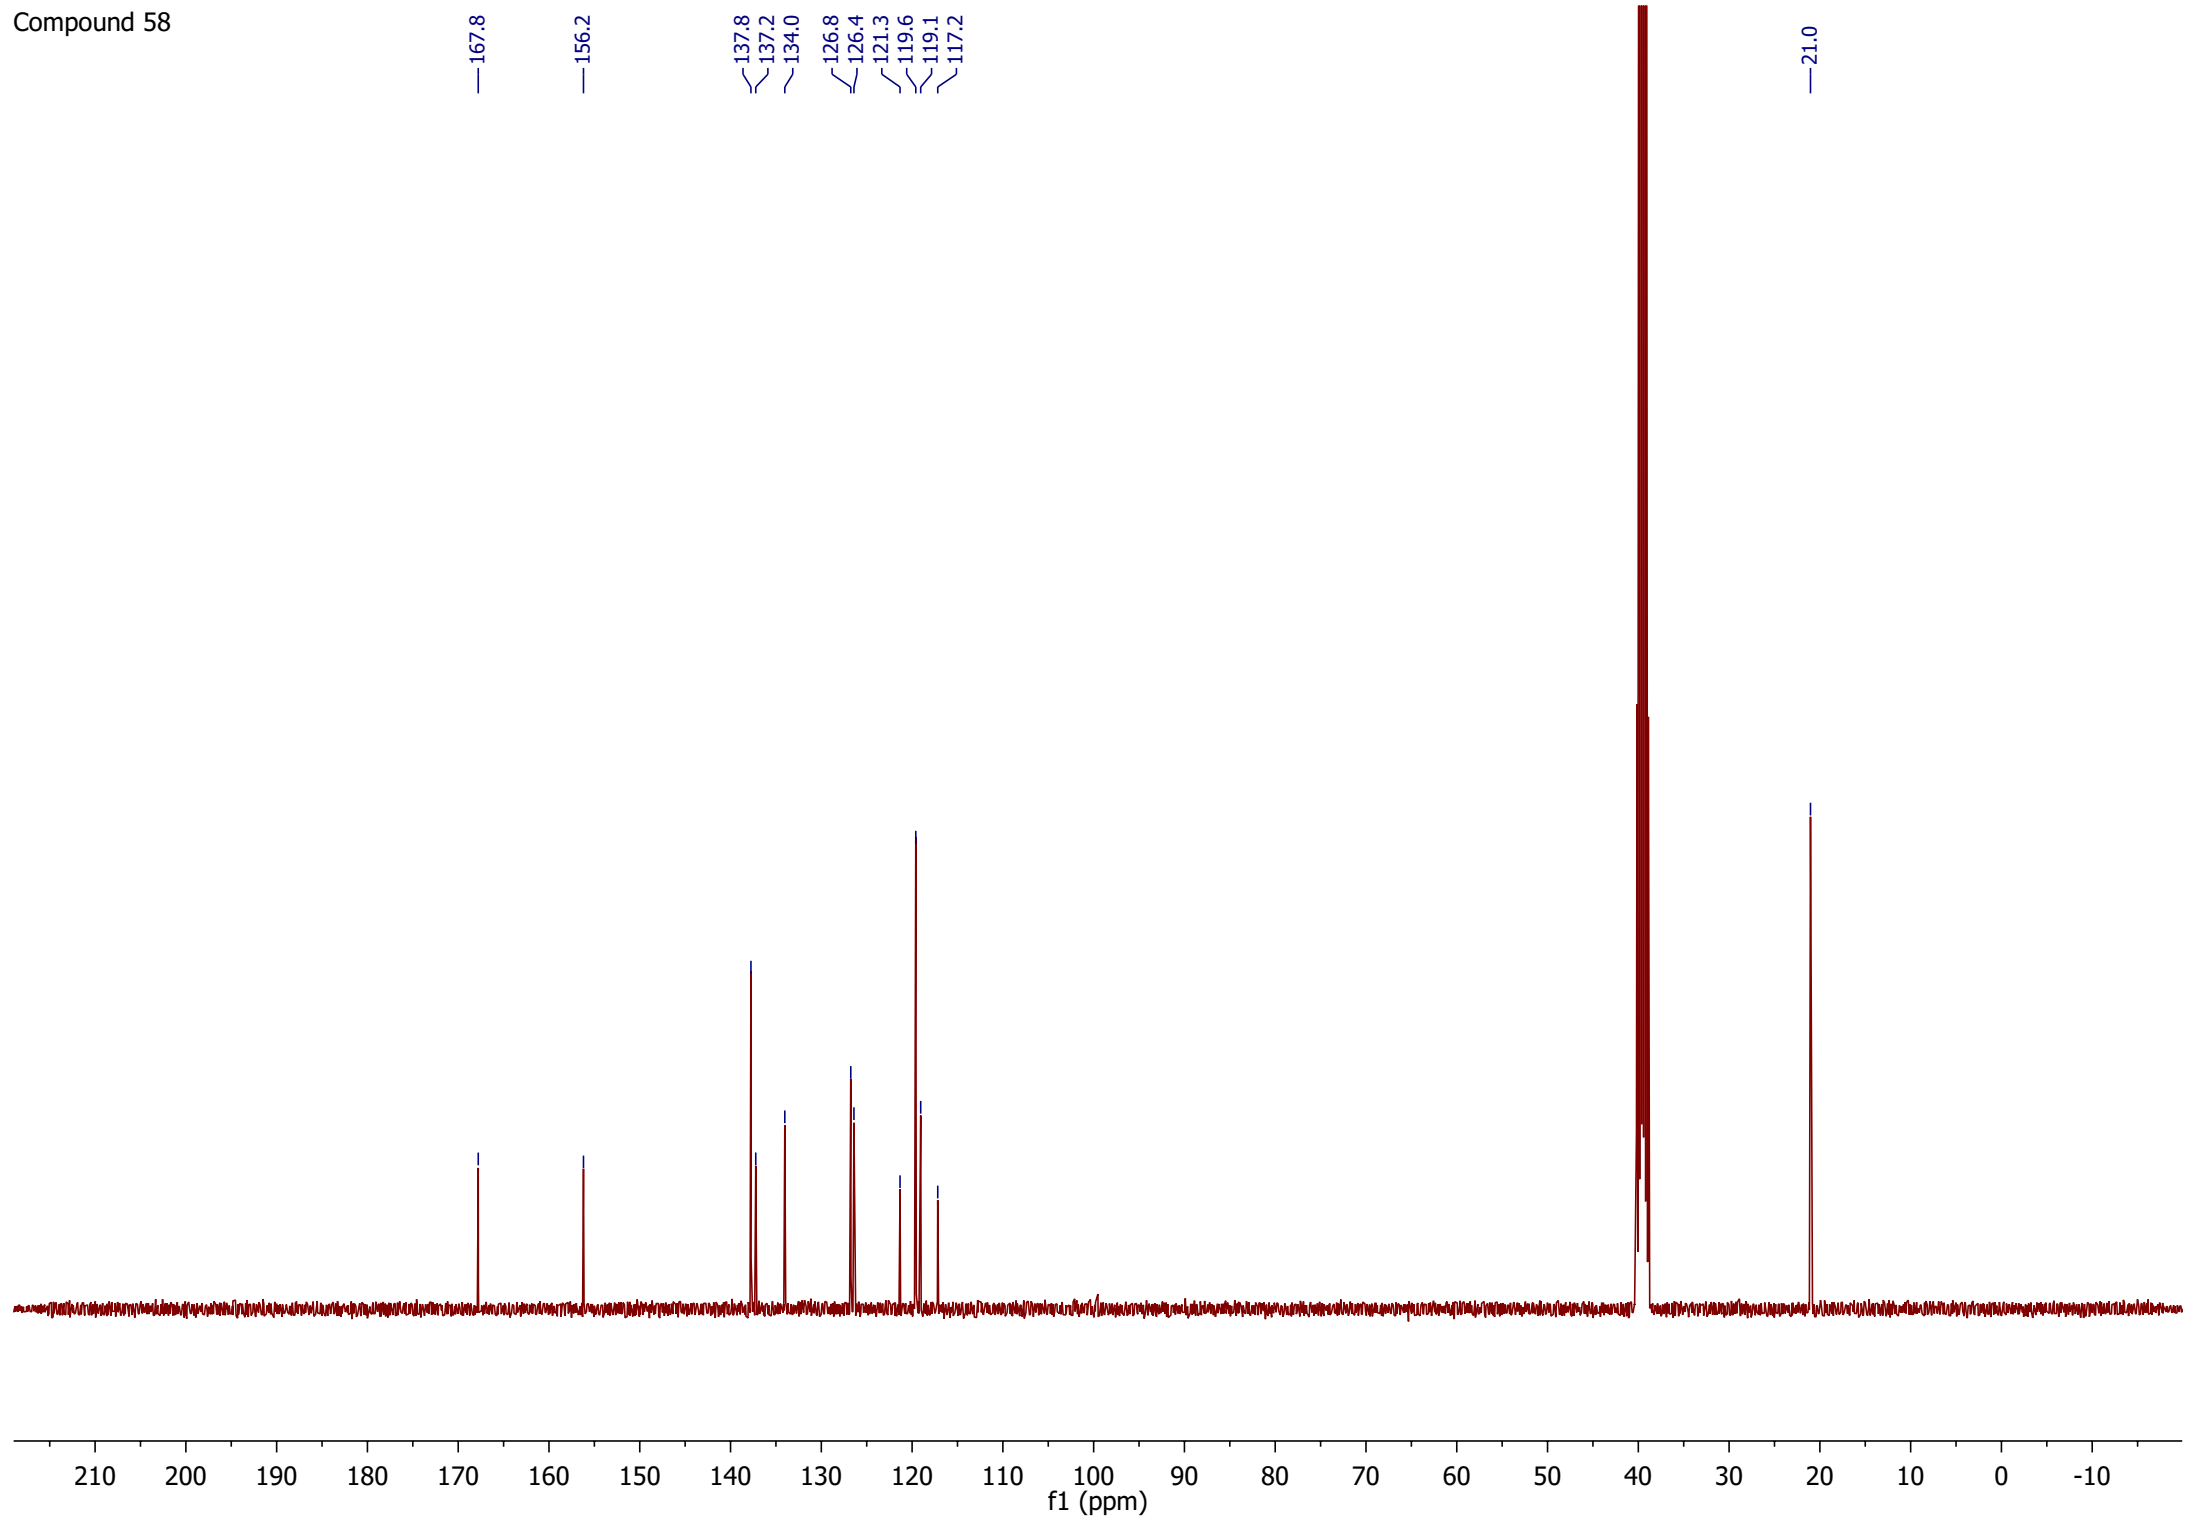

Compound 59

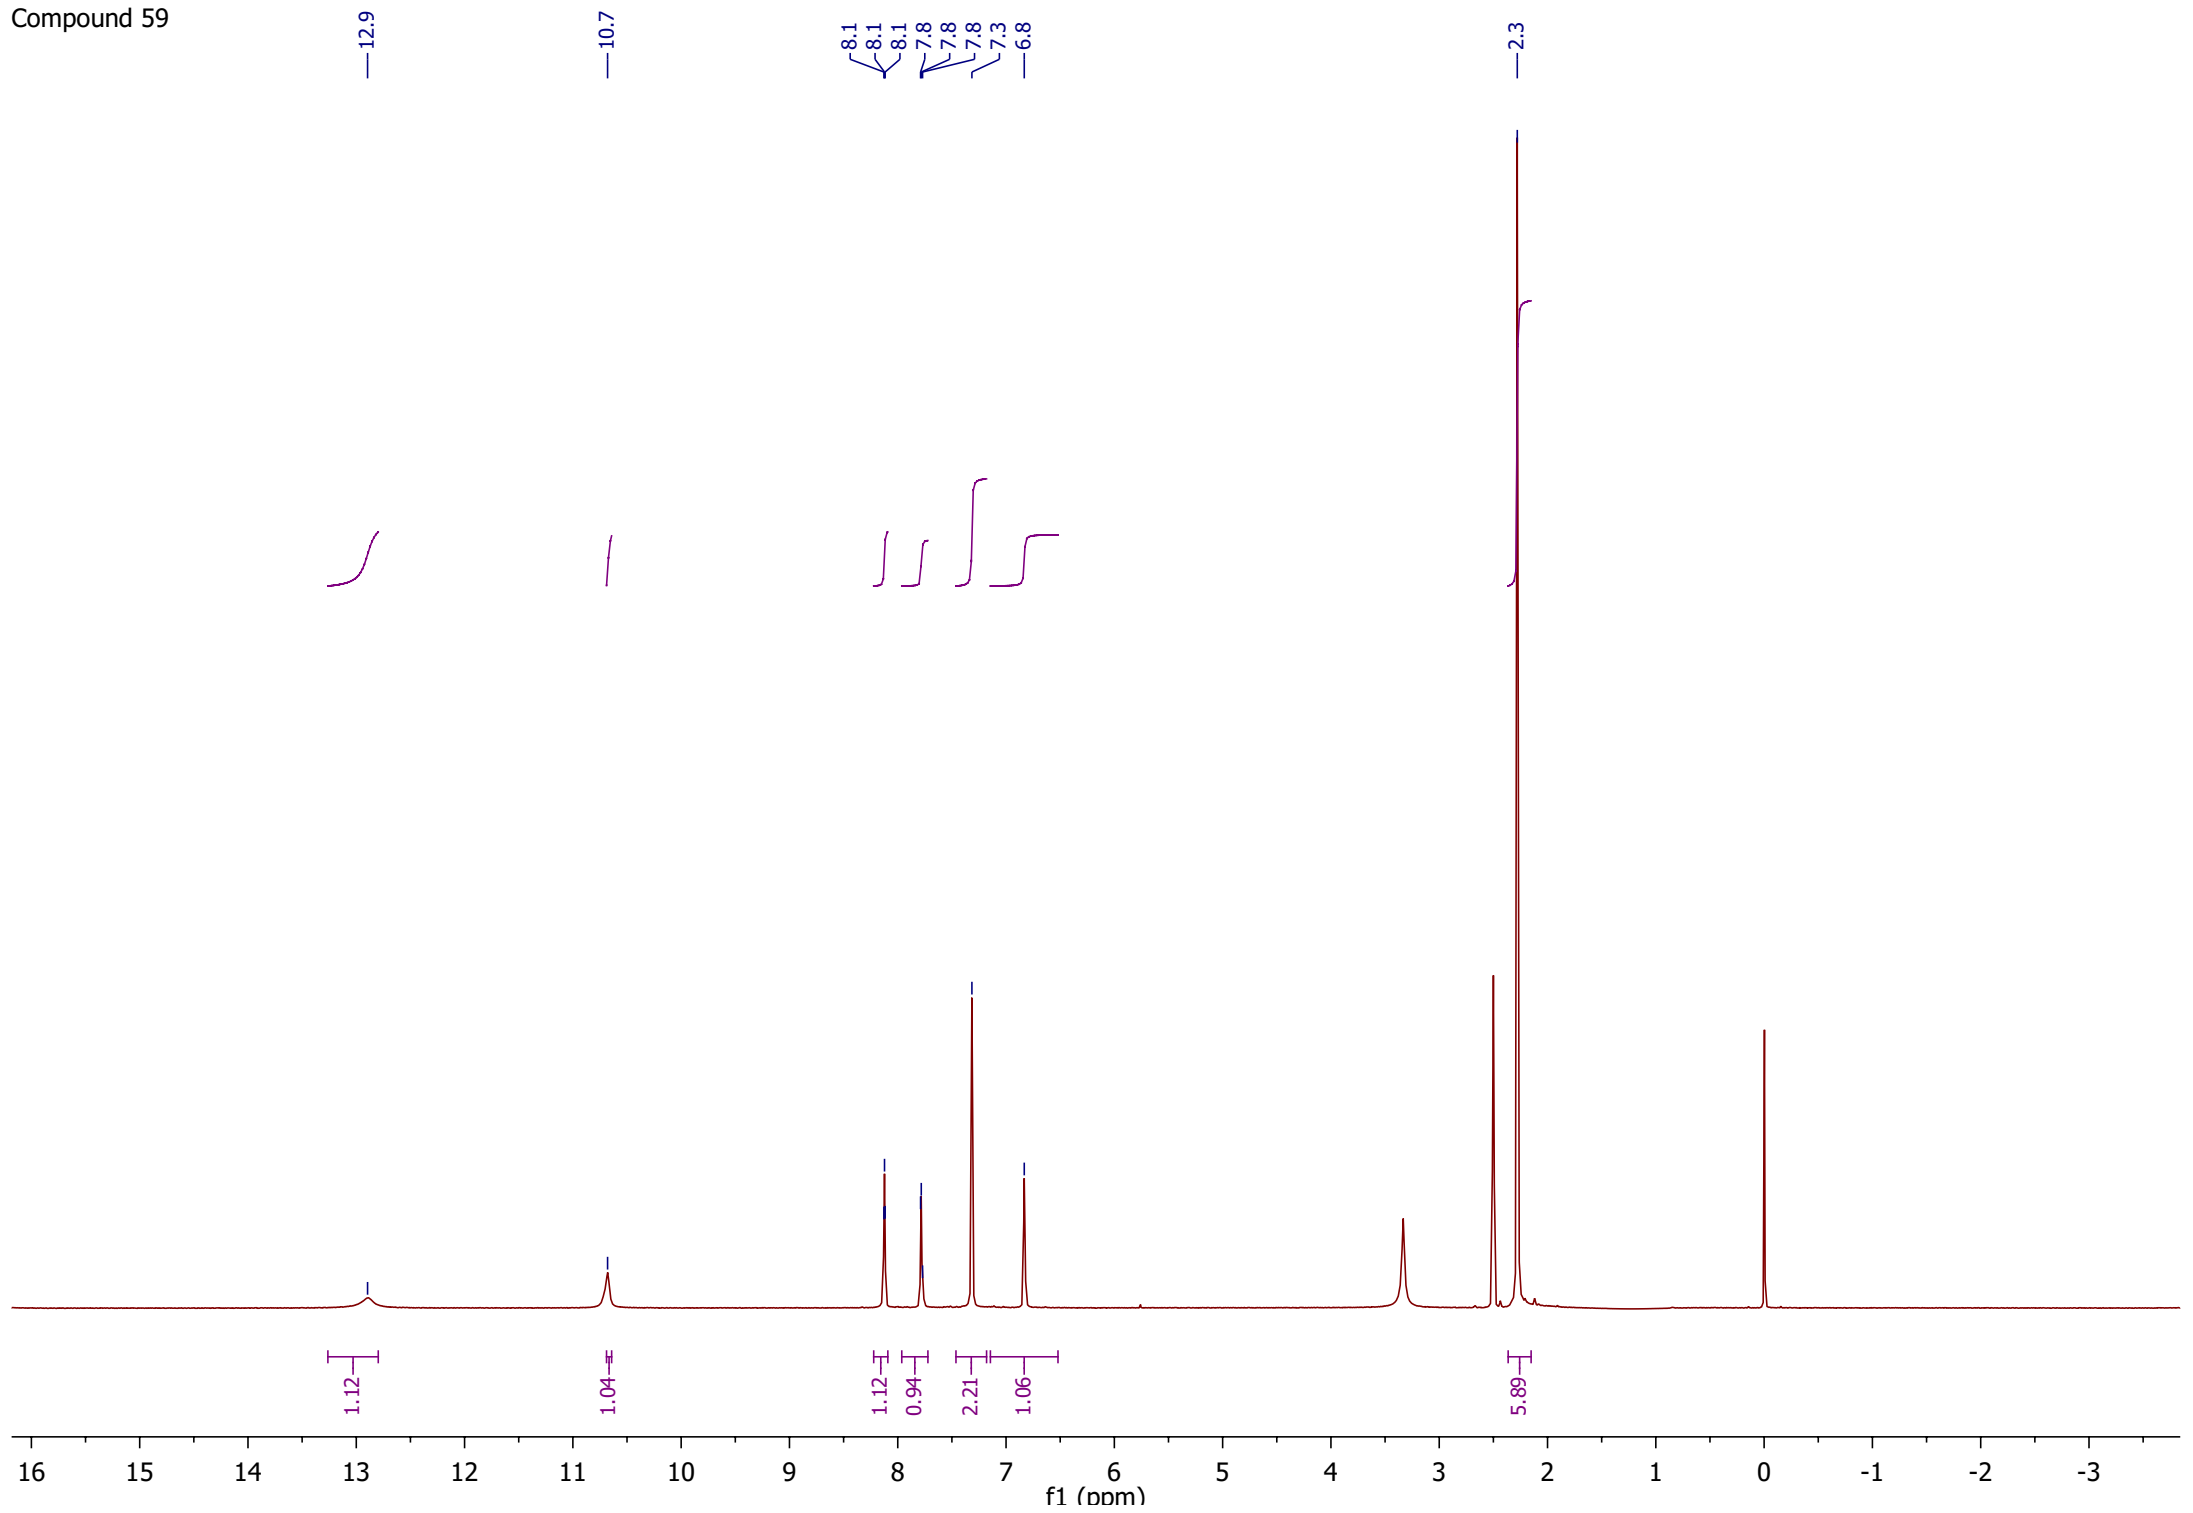

Compound 59

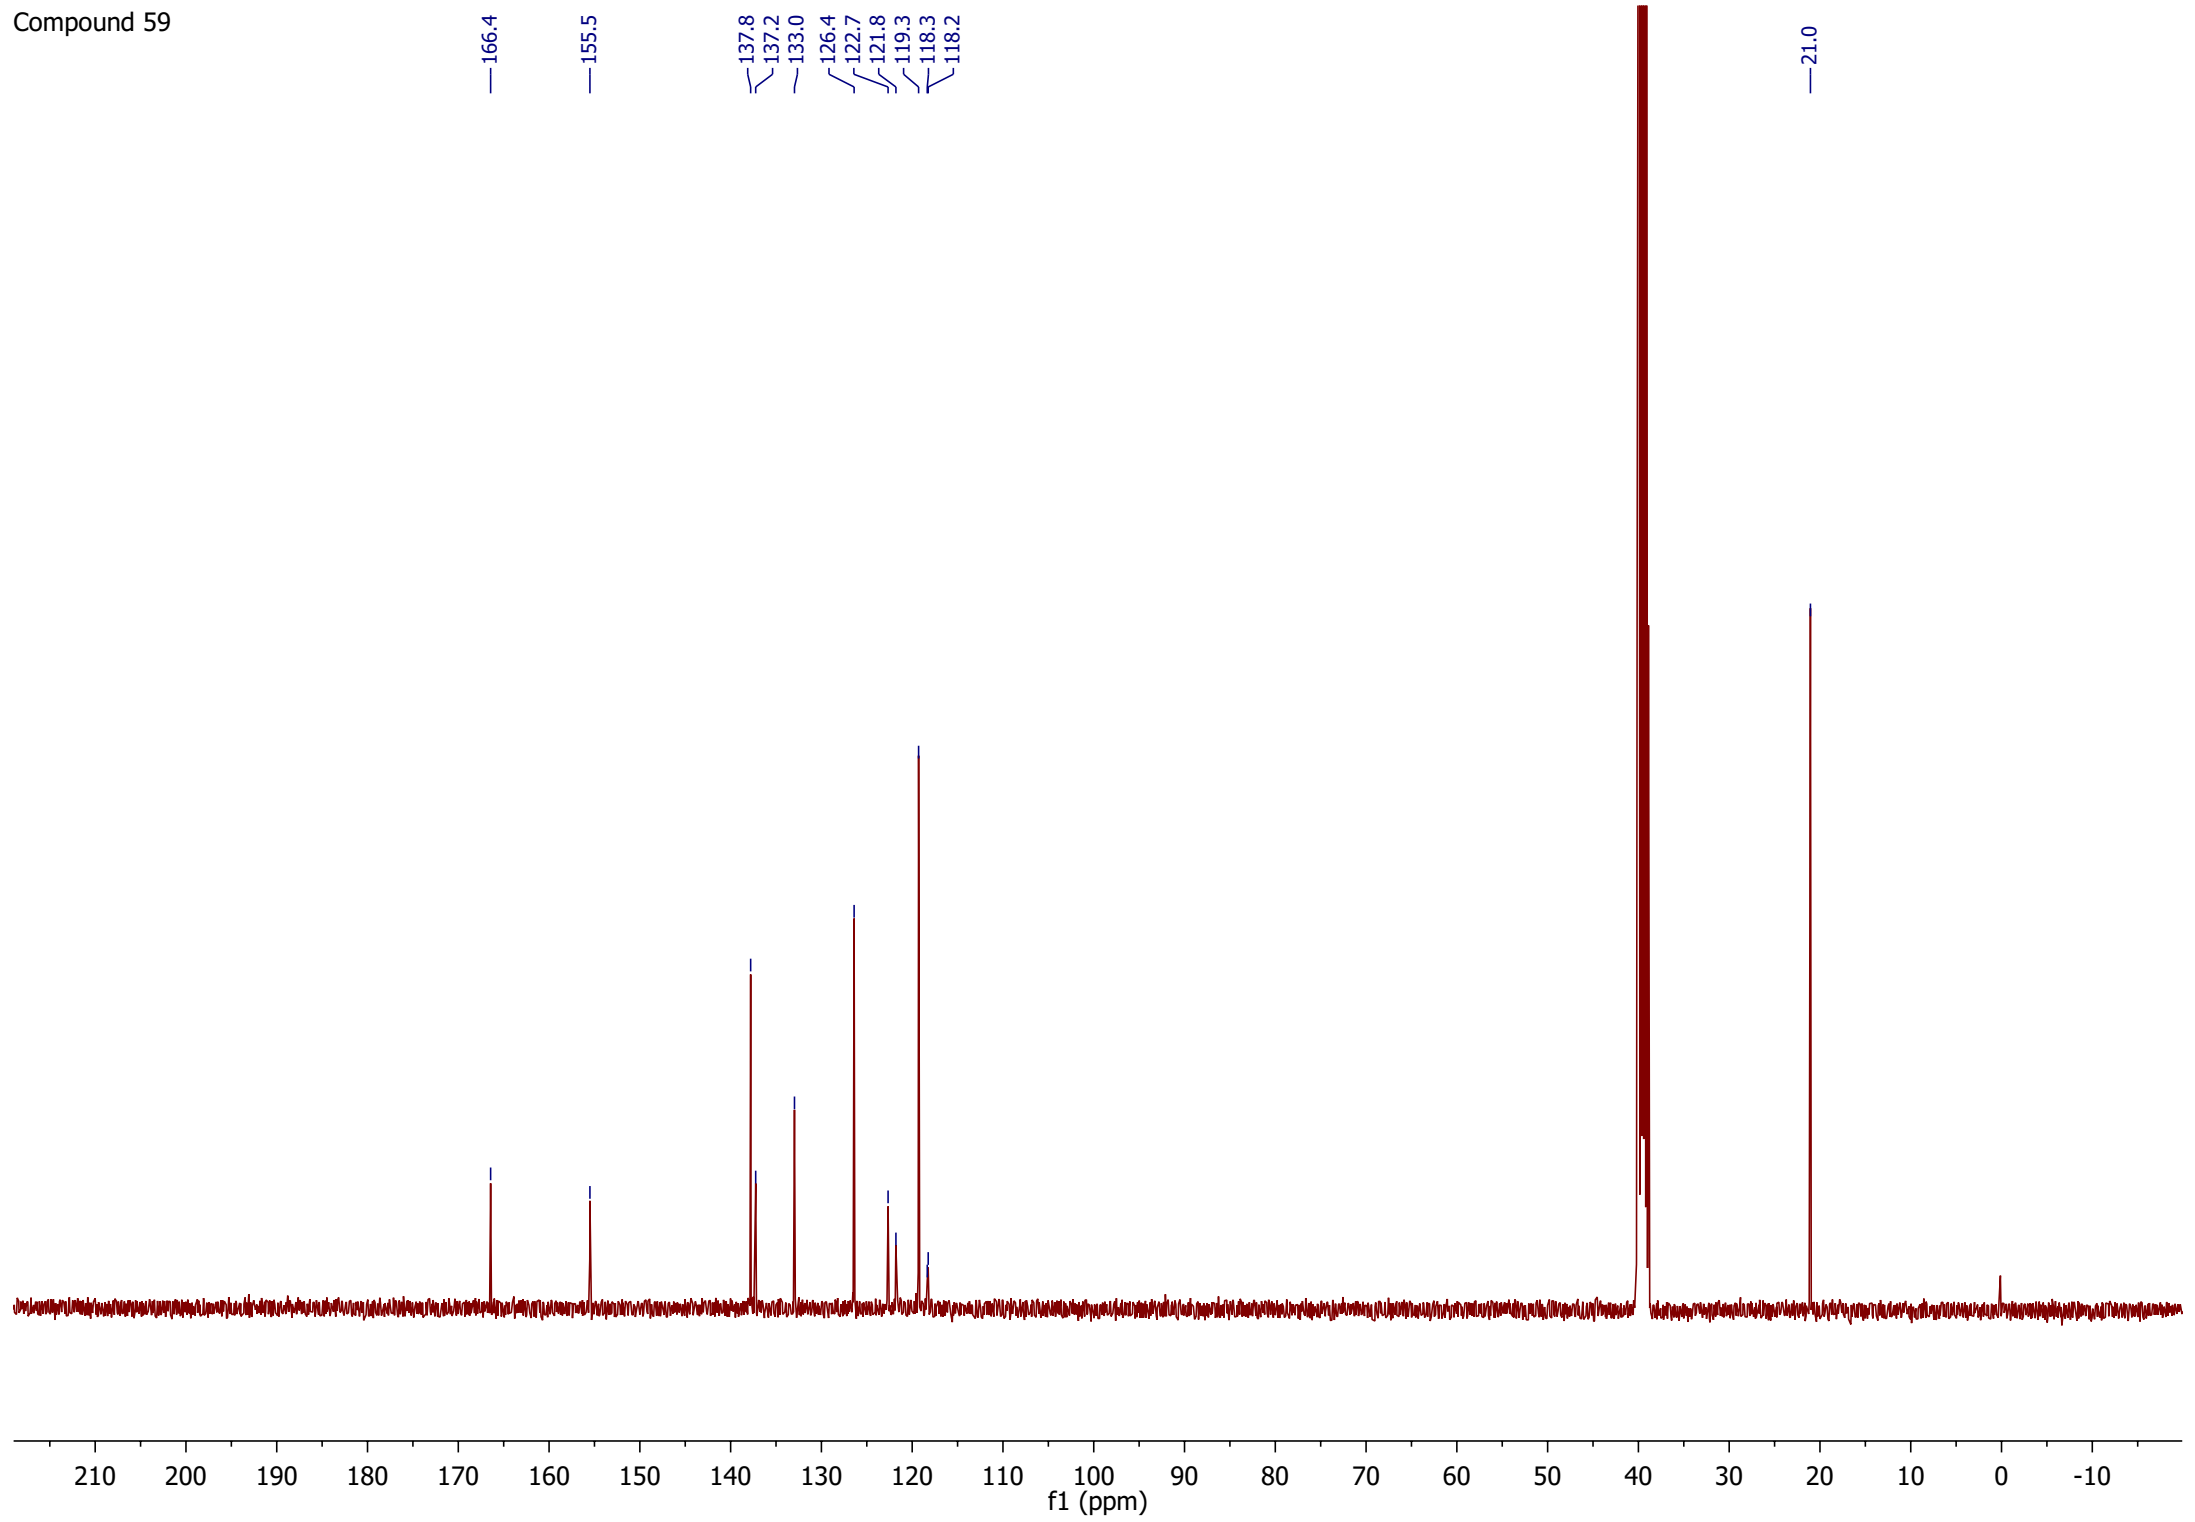

Compound 60  
14.7

7.9  
7.9  
7.6  
7.6  
7.4  
7.4  
7.4  
7.3  
7.3

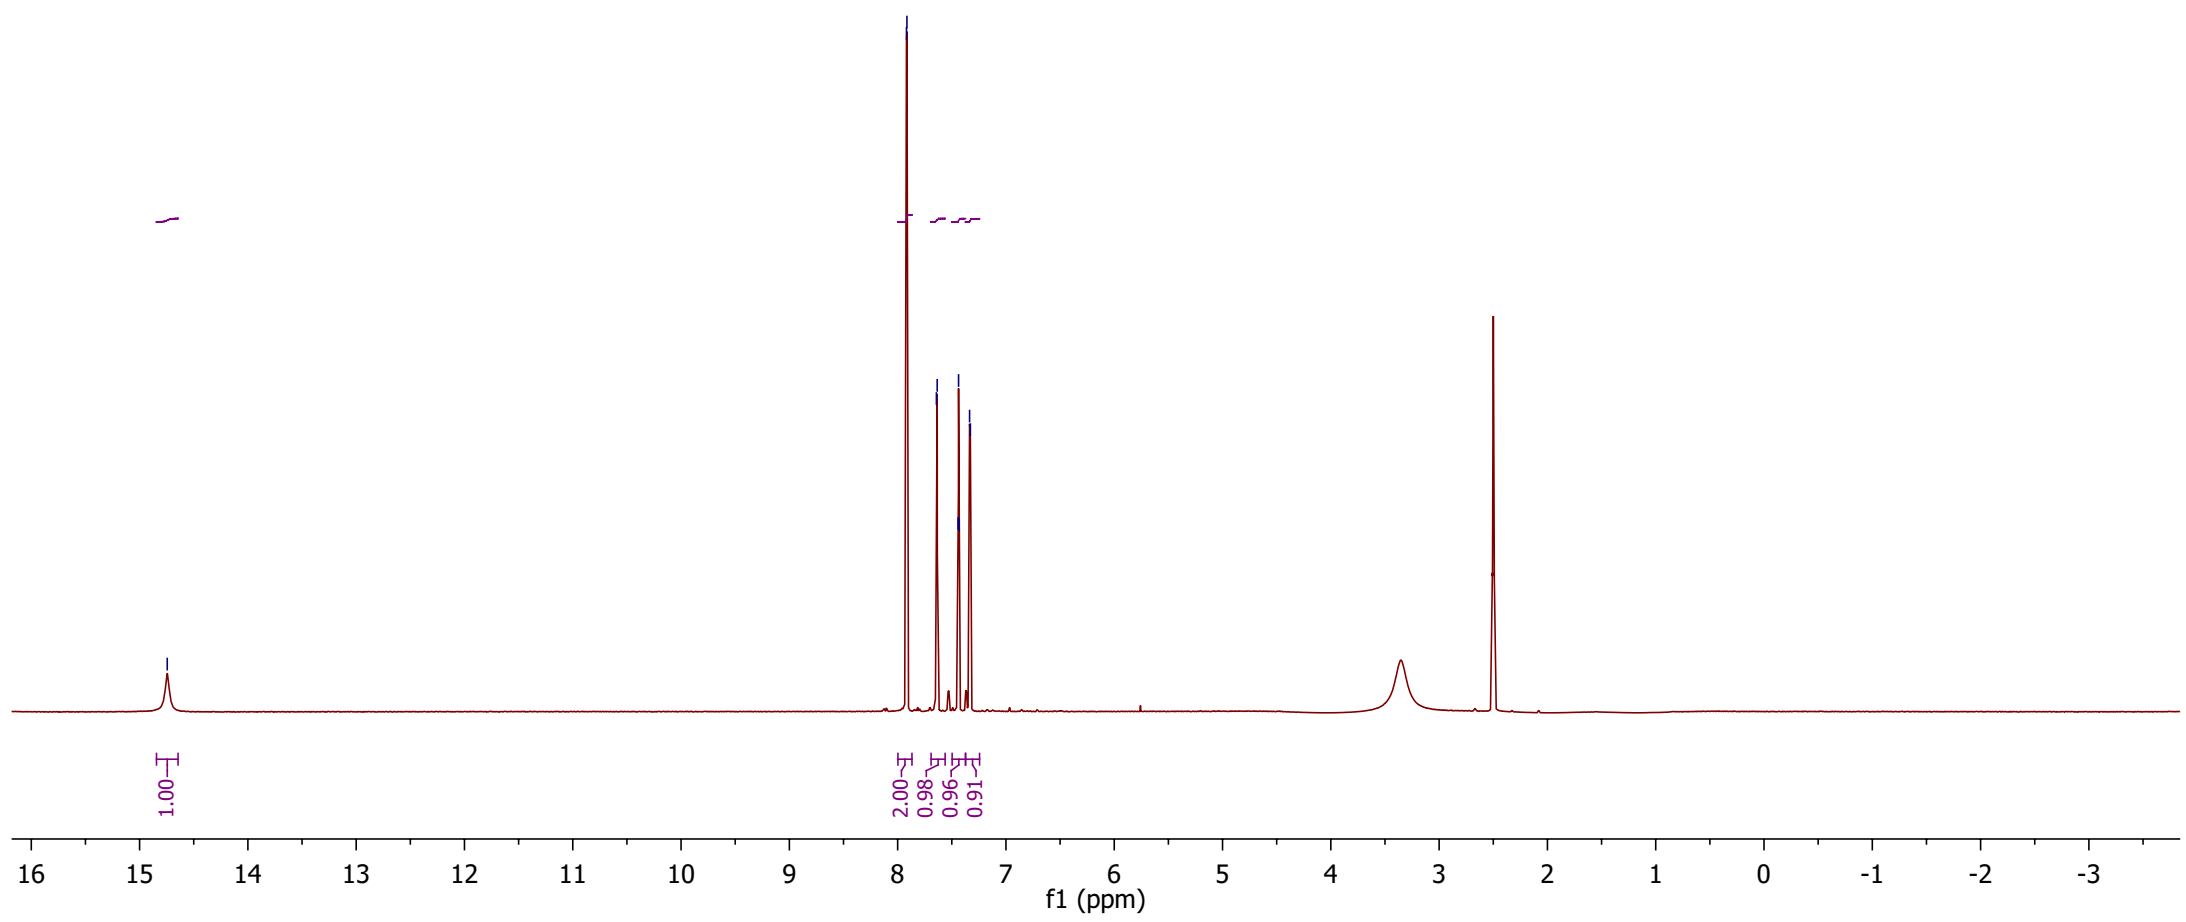



Compound 60

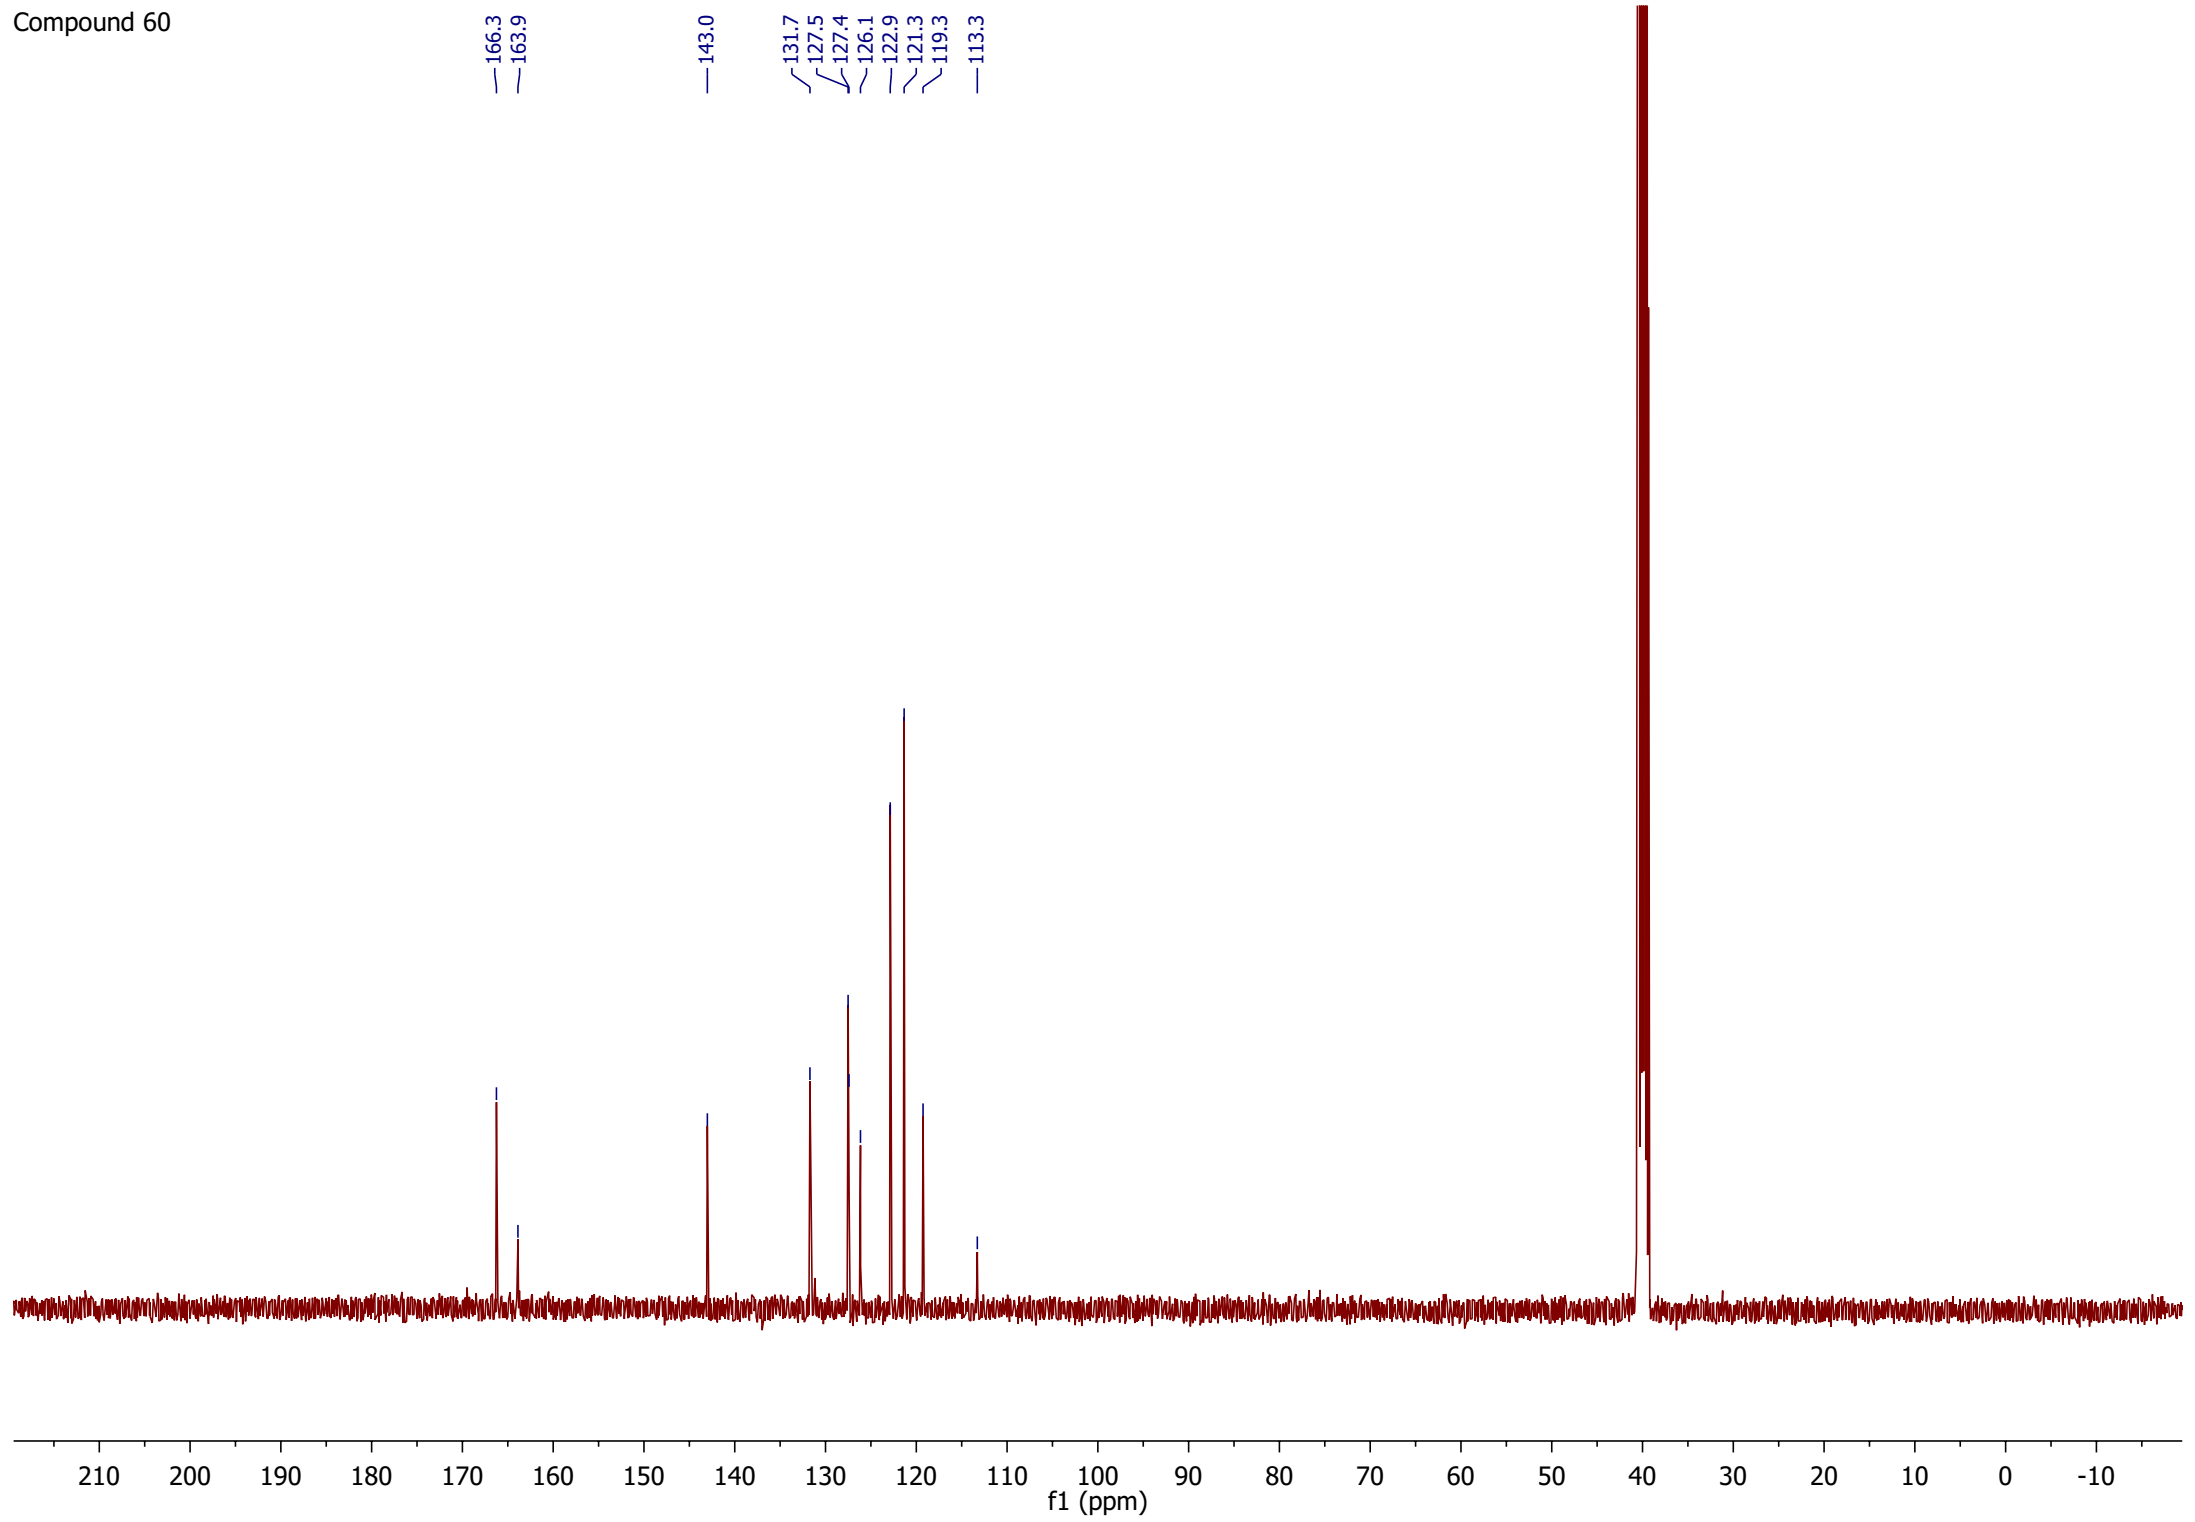

Compound 61

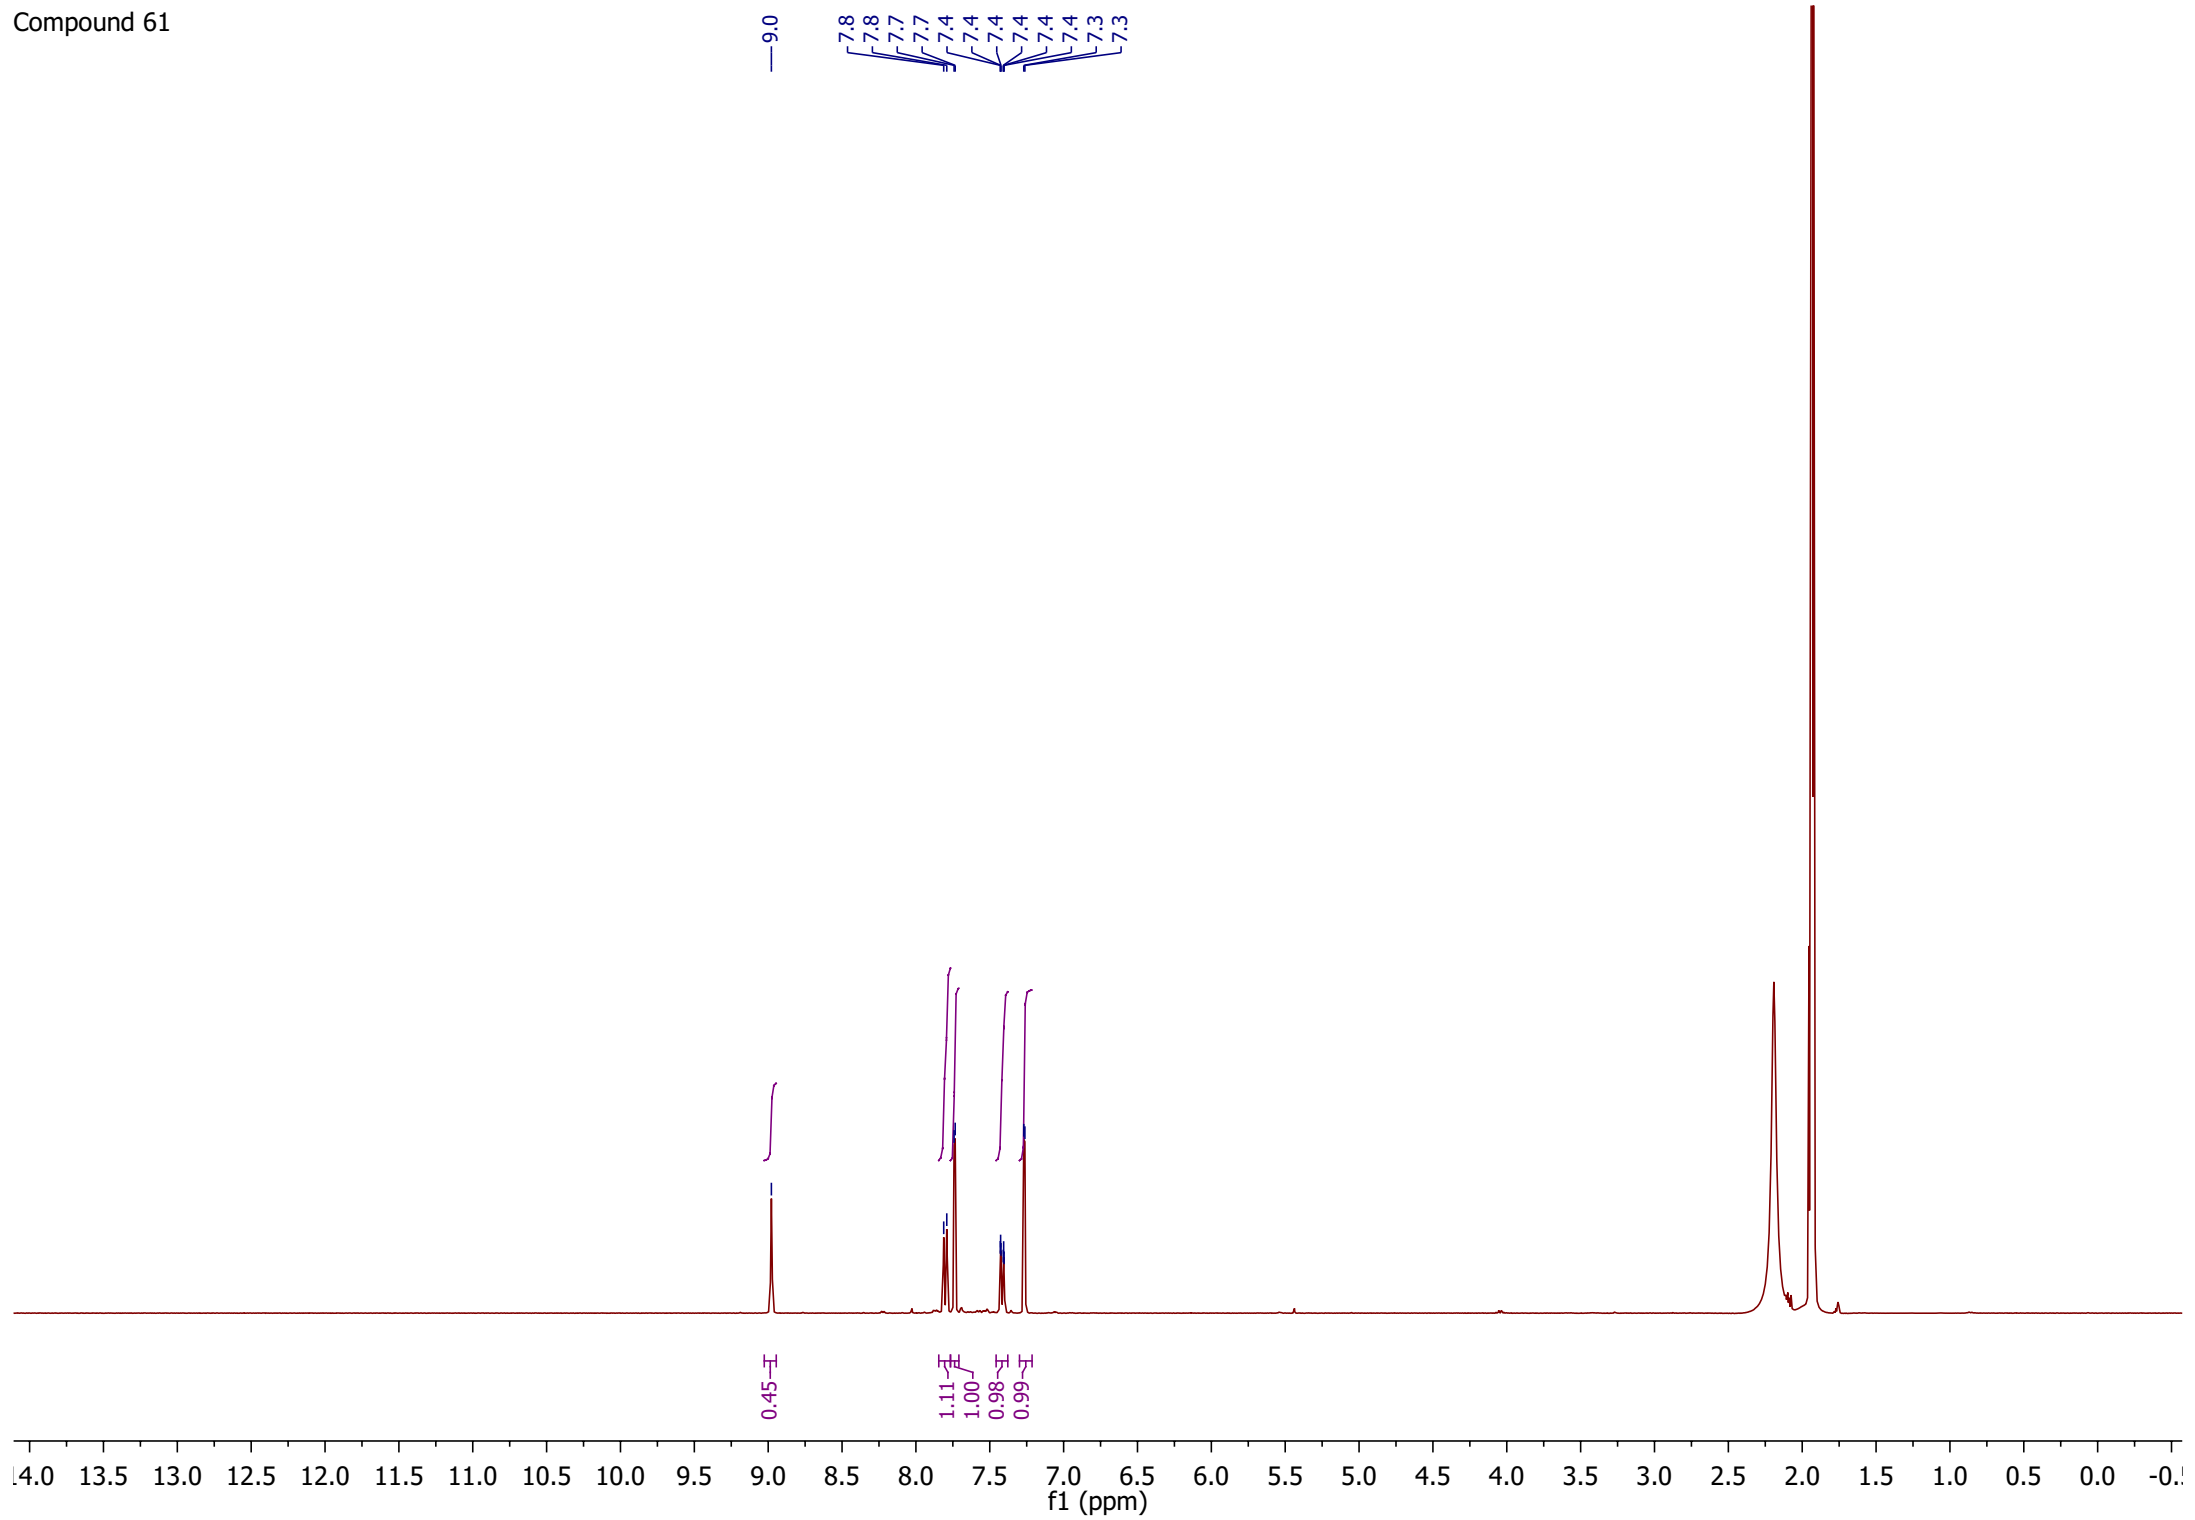

Compound 61

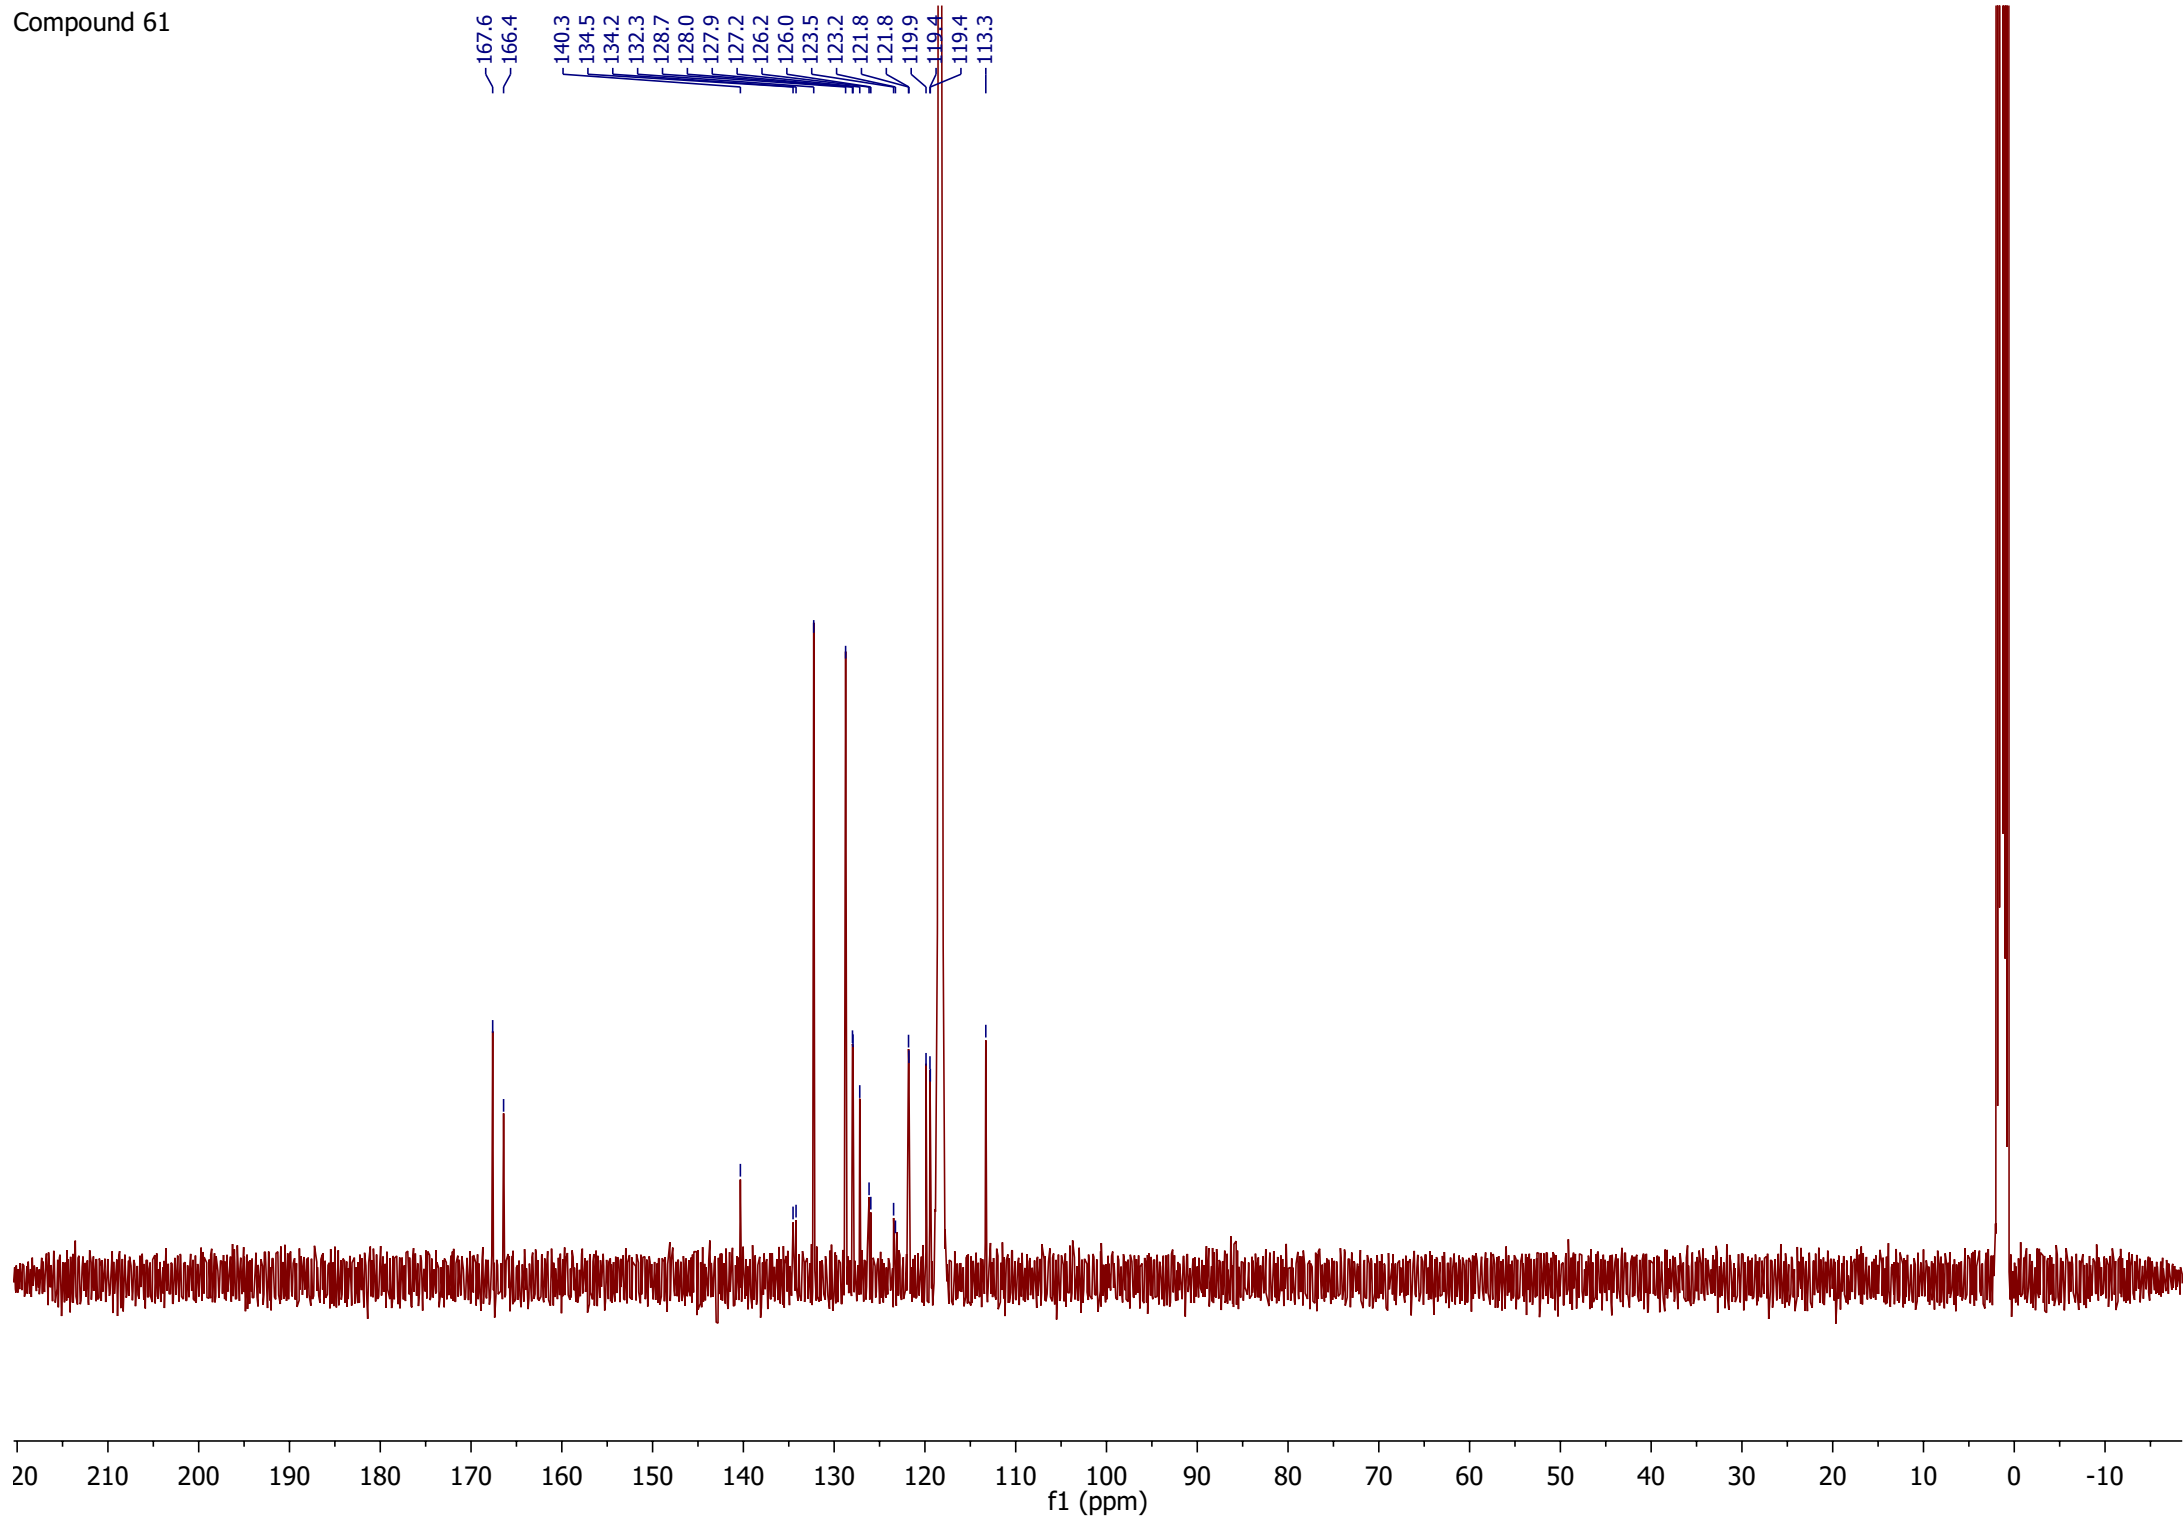

Compound 62

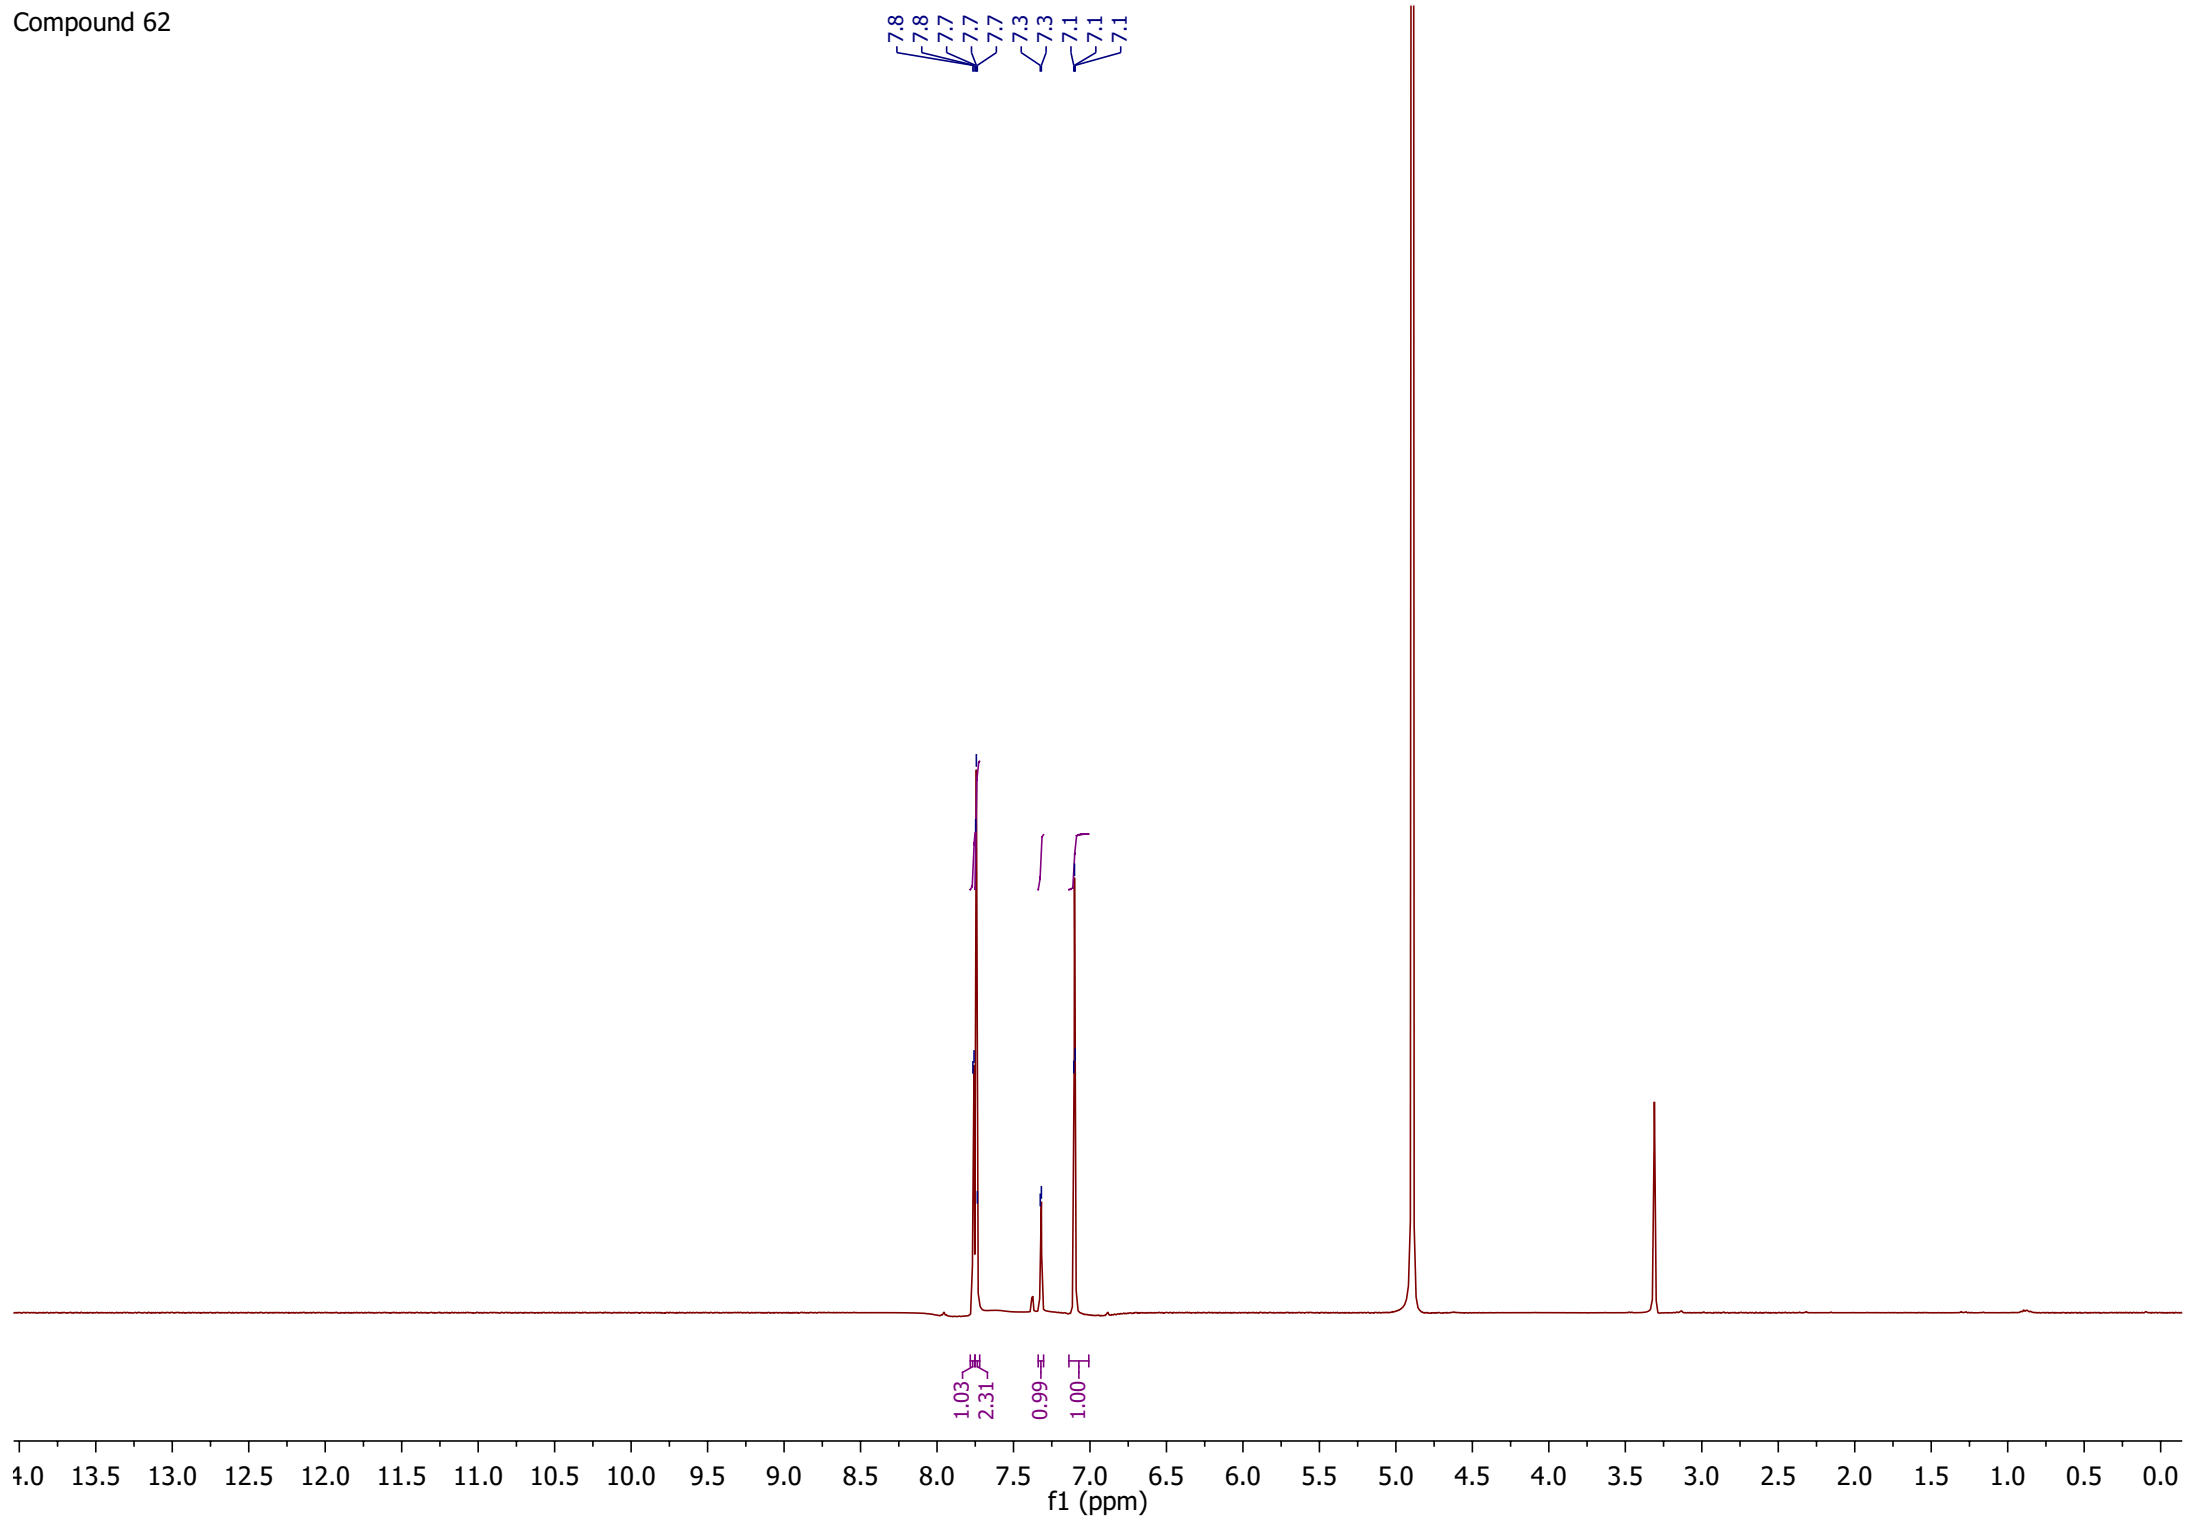

Compound 62

— 166.5  
— 163.6  
  
— 141.4  
— 134.8  
— 131.7  
— 131.5  
— 127.3  
— 126.9  
— 122.4  
— 118.0  
— 115.7

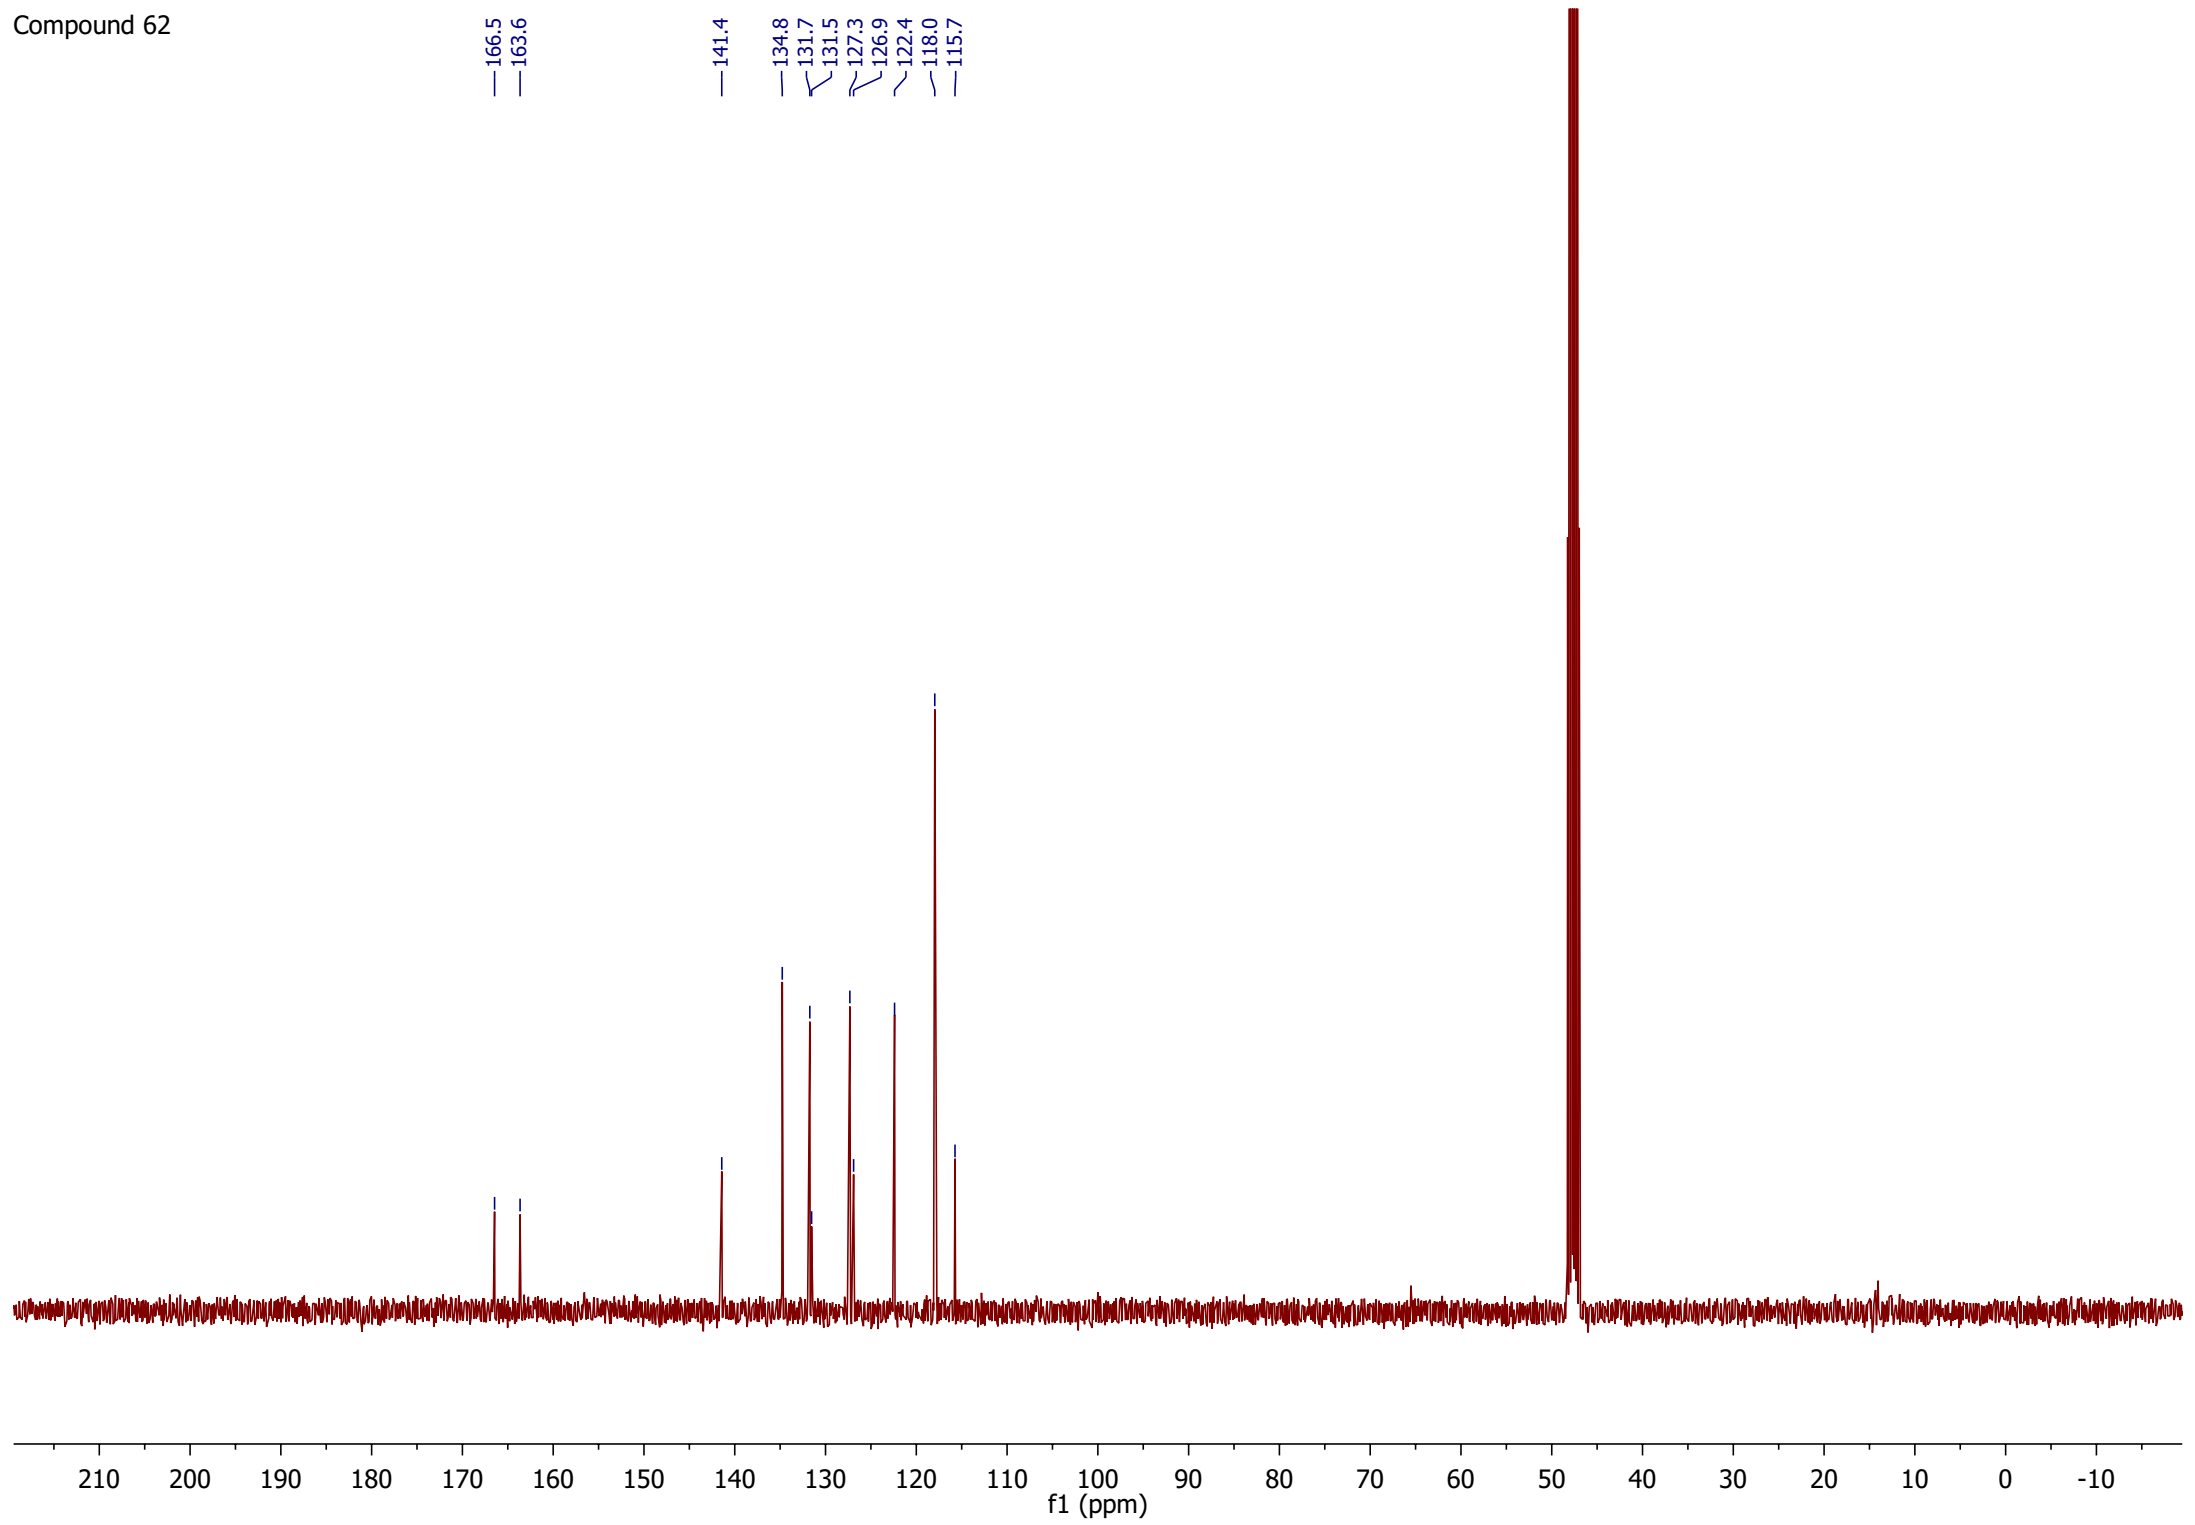

Supplement: NIHMS1061524-supplement-supp_info.pdf [file NIHMS1061524-supplement-supp_info.pdf]
